# Supplementary material for: Perfluoroalkylative pyridylation of alkenes via 4-cyanopyridine-boryl radicals
Source: PubMed Central journal article supplement — Chem Sci. 2019 Jan 16;10(9):2767–72. doi: 10.1039/c8sc05237a (PMC6419949; doi:10.1039/c8sc05237a), 2019-01-16
Supplement: SC-010-C8SC05237A-s001.pdf [file SC-010-C8SC05237A-s001.pdf]

## Supporting Information for

# Perfluoroalkylative Pyridylation of Alkenes *via* 4-Cyanopyridine-Boryl Radicals

Jia Cao, Guoqiang Wang, Liuzhou Gao, Hui Chen, Xueting Liu, Xu Cheng, Shuhua Li\*

[\*] J. Cao, G. Wang, L. Gao, H. Chen, X. Liu, Prof. Dr. X. Cheng, Prof. Dr. S. Li\*

*Key Laboratory of Mesoscopic Chemistry of Ministry of Education, Institute of Theoretical and Computational Chemistry, School of Chemistry and Chemical Engineering, Nanjing University, Nanjing, 210093, P. R. China*

Prof. Dr. X. Cheng

*Institute of Chemistry and Biomedical Sciences, Jiangsu Key Laboratory of Advanced Organic Material, School of Chemistry and Chemical Engineering, Nanjing University, Nanjing, 210093, P. R. China*

J. Cao

*Shaanxi Key Laboratory of Chemical Reaction Engineering, School of Chemistry and Chemical Engineering, Yan'an University, Yan'an 716000, P. R. China*

E-mail: shuhua@nju.edu.cn

|                                                                  |             |
|------------------------------------------------------------------|-------------|
| <b>1. Computational Investigations.....</b>                      | <b>S2</b>   |
| <b>2. Experiment studies on the Substrate Scope.....</b>         | <b>S5</b>   |
| <b>3. Experiment studies on the Reaction mechanism.....</b>      | <b>S10</b>  |
| <b>4. Spectroscopic Characterization of the Products.....</b>    | <b>S16</b>  |
| <b>5. NMR Spectra.....</b>                                       | <b>S47</b>  |
| <b>6. Cartesian Coordinates of the Optimized Structures.....</b> | <b>S126</b> |
| <b>7. References.....</b>                                        | <b>S152</b> |

# 1. Computational Investigations

## 1.1 Computational Details

All calculations were performed with the Gaussian 16 package.<sup>[1]</sup> A “broken-symmetry” guess was used for calculations on open-shell systems. Geometry structures of all the stationary points were optimized by using the M06-2X<sup>[2]</sup> method. The LANL2DZ basis set is employed for the iodine atom, and the 6-31G(d,p) basis set is used for all the other atoms. At the same level of theory, vibrational frequencies of all the stationary points were further calculated to check the nature of the minima and the transition states. To confirm that each transition state connects the desired reactants and products along the reaction path, we performed intrinsic reaction coordinate (IRC)<sup>[3]</sup> calculations at the same level. In order to obtain reliable energies, single point energies (Esol) were computed using M06-2X method with a larger basis set. The cc-PVTZ basis set is used for all the other atoms (the LANL2DZ basis set for the iodine atom). The solvent effect was treated with the polarizable continuum model (PCM) with benzene as the solvent.<sup>[4]</sup> The 3D structures were generated with CLY view.<sup>[5]</sup>

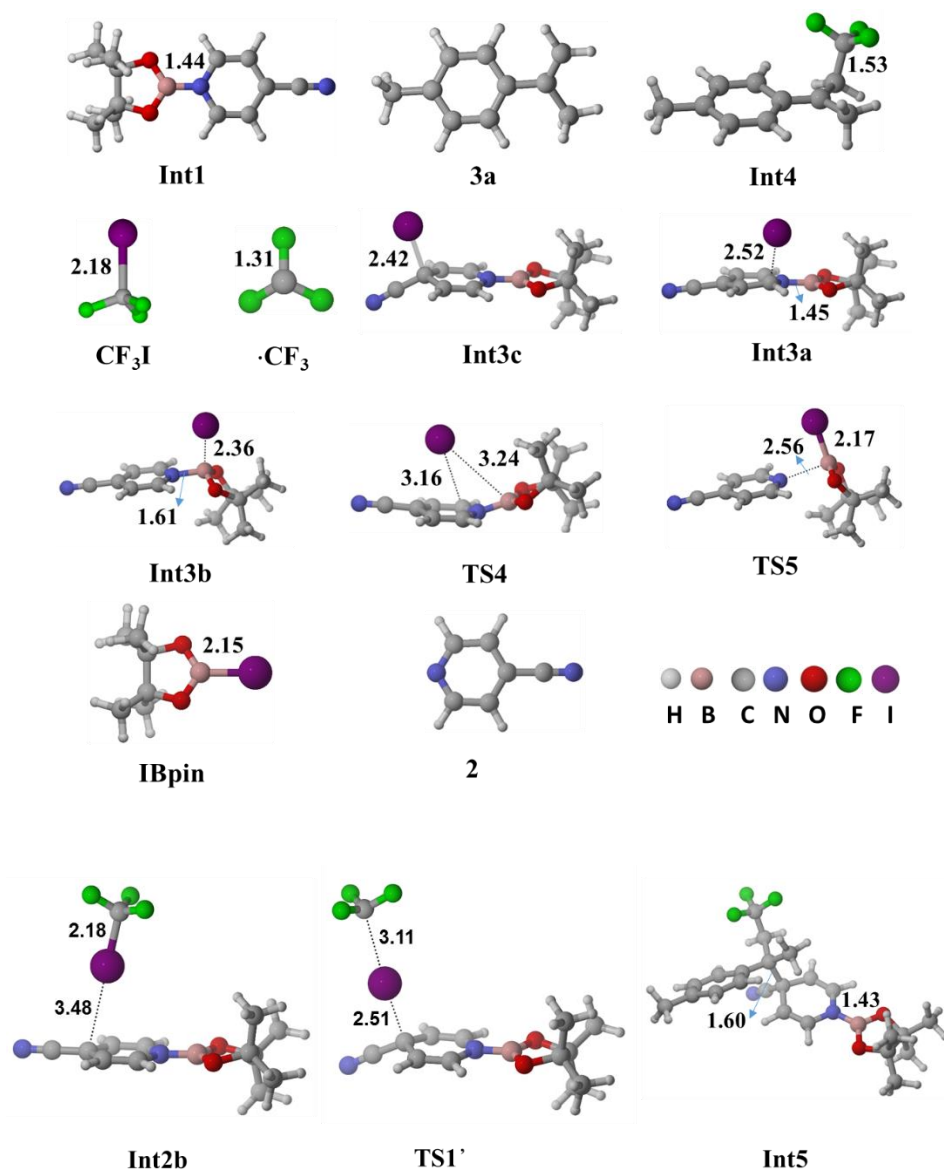

**Figure S1.** Optimized structures of all minimum species and some transition states in the alkene difunctionalization. Interatomic distances are in Å.

## 1.2 Theoretical studies on the C-I bond homolysis of CF<sub>3</sub>I mediated by 4-cyanopyridine-boryl radical at the C4 position

The C-I bond homolysis by the 4-cyanopyridine-boryl radicals at the C4 position is also investigated (shown in Figure S2). This process is endergonic by 31.0 kcal/mol, with a barrier of 37.7 kcal/mol (relative to **Int1** and **1b**), suggesting that the pathway is less favorable.

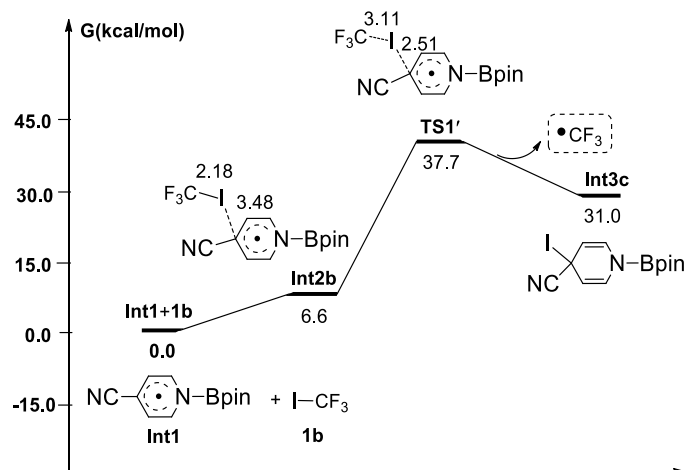

**Figure S2.** Calculated Gibbs free energy (in kcal/mol) profile for the C-I bond homolysis by the 4-cyanopyridine-boryl radicals at the C4 position. Interatomic distances are in Å.

### 1.3 Theoretical studies on the isomerization of the intermediate **Int3a**

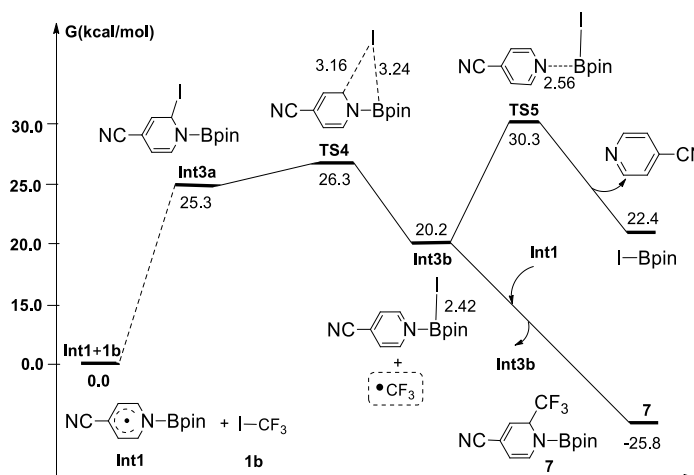

**Figure S3.** Computed Gibbs free energy (in kcal/mol) profile for the isomerization of **Int3**; Interatomic distances are in Å.

We calculate the isomerization reaction of **Int3a** (see Figure S3). Starting from **Int3a**, the intramolecular migration of the iodine atom from C2 atom to B atom *via* **TS4**, could yield another isomer **Int3b**, which further proceeds through the breaking of the B-N bond (*via* **TS5**) to regenerate 4-cyanopyridine. Overall, the rate-determining barrier height of this process is 10.1 kcal/mol and endergonic by 2.9 kcal/mol (relative to **Int3a**), indicating that the C-I bond homolysis is a catalytic process by 4-

cyanopyridine. In addition, the generated trifluoromethyl radical can react with **Int1** to produce the compound **7**, which is exothermic by 25.8 kcal/mol.

#### 1.4 The calculated results for a single electron transfer (SET) process

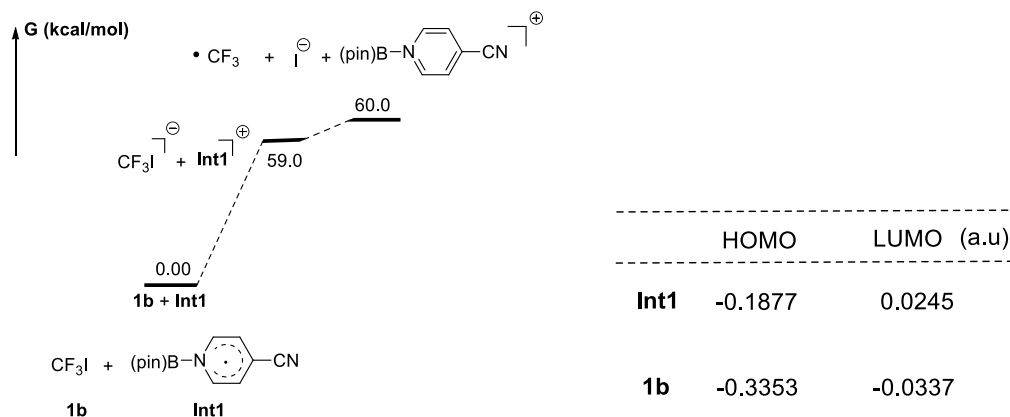

**Figure S4.** SET process between CF<sub>3</sub>I (**1b**) and **Int1**

Moreover, our calculations suggest that the direct single electron transfer (SET) process from the 4-cyanopyridine-boryl radical to CF<sub>3</sub>I is highly endergonic by 60.0 kcal/mol (see Figure S4). Thus, the SET mechanism is unlikely responsible for the generation of the perfluoroalkyl radicals in the reaction.

#### 1.5 Theoretical Investigations on the reactivity of various alkenes

Our calculations suggest that the barrier heights of the addition of trifluoromethyl radical to internal alkene or terminal monosubstituted styrene is higher than that of terminal disubstituted styrene by 1.1~3.4 kcal/mol (see Table S1). Thus, internal alkenes or terminal monodisubstituted styrenes are not suitable for the present transformation.

**Table S1** The calculated activation barrier ( $\Delta G^\ddagger$ ) and reaction energies ( $\Delta G$ ) for the reaction of the trifluoromethyl radical with various alkenes

| Alkenes                                                                             | CF <sub>3</sub> radical addition |            | cross-coupling      |            |
|-------------------------------------------------------------------------------------|----------------------------------|------------|---------------------|------------|
|                                                                                     | $\Delta G^\ddagger$              | $\Delta G$ | $\Delta G^\ddagger$ | $\Delta G$ |
| 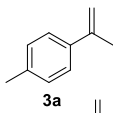   | 9.0                              | -31.2      | -24.7               | -50.3      |
|    | 9.3                              | -32.7      | -24.8               | -50.5      |
|    | 10.4                             | -31.9      | -23.4               | -55.3      |
|   | 10.2                             | -29.6      | -20.0               | -48.2      |
|  | 12.4                             | -22.5      | -10.1               | -46.6      |

## 2. Experiment studies on the Substrate Scope

### 2.1 General information

All reactions were carried out under argon atmosphere. All commercially available reagents were used without further purification. Dry CH<sub>3</sub>CN, CH<sub>2</sub>Cl<sub>2</sub>, methyl tert-butyl ether (MTBE) and THF were purchased from Acros and used as received. All NMR spectra were recorded on a Bruker AVANCE III-400 spectrometer at room temperature with CDCl<sub>3</sub> as the solvent and TMS as the internal standard. Chemical shifts ( $\delta$ ) were reported in ppm with respect to the residue solvent peak. Coupling constant ( $J$ ) were reported in Hert (Hz), abbreviations for signal couplings are indicated as follows: s, singlet; d, doublet; t, triplet; m, multiplet; br, broad. Infrared spectra were recorded on a ThermoFisher Nicolet iS5 FTIR using neat thin film technique. The electron paramagnetic resonance (EPR) spectra were obtained using a Bruker EMX-10/2 EPR spectrometer at 298.15 K. High-resolution mass spectra (HRMS) were recorded on

Thermo Quest Finnigan LCQDECA system equipped with electrospray ionization (ESI).

## 2.2 Synthesis of alkenes

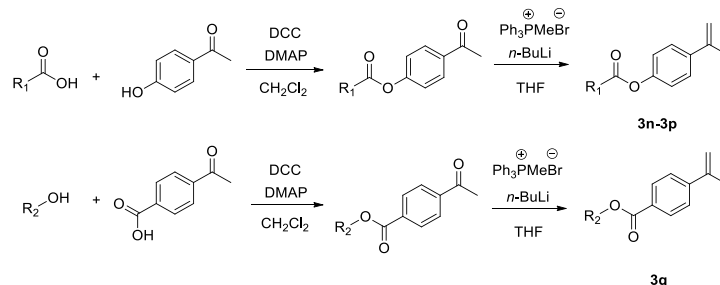

**Scheme S1** Synthesis of substrates (**3n-3q**)

Alkenes **3n-3q** were synthesized according to the reported procedure (see Scheme S1).<sup>[6-8]</sup> At first, a sealed reaction bottle charged with a magnetic stir bar, carboxylic acid (10.0 mmol, 1.0 equiv), DCC (dicyclohexylcarbodiimide) (12.0 mmol, 1.2 equiv), DMAP (4-dimethylaminepyridine) (1.5 mmol, 0.15 equiv) and 4-hydroxyacetophenone (12.0 mmol, 1.2 equiv) in CH<sub>2</sub>Cl<sub>2</sub> (20 mL). The reaction mixtures were stirred at room temperature for 24 h. Then it was filtered through a plug of silica gel (washed with EA, ethyl acetate). The filtrate was concentrated in *vacuo* and the residue was purified by chromatography on silica gel, eluting with PE/EA=10:1 (v/v) to afford the corresponding product.<sup>[6-7]</sup> Second, under argon atmosphere, a stirred solution of methyltriphenylphosphonium bromide (5 mmol, 1.8 g) in THF (10 mmol), *n*-butyl lithium (5.0 mmol) in hexane was added dropwise at 0 °C for 30 min. After the addition, the reaction mixture was further stirred 30 min. Subsequently, a THF solution of ketone was added dropwise for 30 min. The reaction mixture was stirred for 12 h at room temperature. Then reaction mixture was quenched with saturated ammonium chloride solution and was extracted with EtOAc. The combined organic layer was dried over Na<sub>2</sub>SO<sub>4</sub> and then concentrated in *vacuo*. The crude reaction mixture was purified by flash column chromatography on silica gel to give the corresponding product.<sup>[8]</sup>

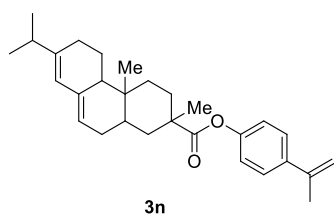

**3n**, Colorless oil, 40% yield.  $^1\text{H}$  NMR (400 MHz,  $\text{CDCl}_3$ )  $\delta$  7.46 (d,  $J = 8.7$  Hz, 2H), 6.99 (d,  $J = 8.7$  Hz, 2H), 5.83 (s, 1H), 5.44 (s, 1H), 5.35 (s, 1H), 5.09 (t,  $J = 1.6$  Hz, 1H), 2.30 – 2.24 (m, 2H), 2.15 (d,  $J = 1.3$  Hz, 3H), 2.13 – 2.10 (m, 2H), 2.06 – 1.94 (m, 4H), 1.88 – 1.80 (m, 2H), 1.60 (s, 3H), 1.41 (s, 3H), 1.29 – 1.24 (m, 2H), 1.07 – 1.03 (m, 6H), 0.91 (s, 3H).  $^{13}\text{C}$  NMR (100 MHz,  $\text{CDCl}_3$ )  $\delta$  177.0, 150.5, 145.3, 142.4, 138.6, 135.6, 126.4, 122.4, 121.2, 120.4, 112.5, 46.9, 45.1, 38.3, 37.1, 34.9, 34.6, 27.5, 25.8, 22.5, 21.9, 21.4, 20.9, 18.2, 17.1, 14.1. IR (film): 2924, 2870, 1750, 1728, 1584, 1508, 1472, 1264, 1205, 1123, 1047, 803. HRMS (ESI-TOF) exact mass calculated for  $\text{C}_{27}\text{H}_{39}\text{O}_2$   $[\text{M}+\text{H}]^+$  419.2945, found 419.2943.

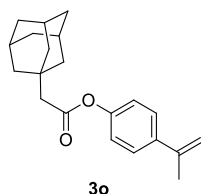

**3o**, Colorless oil, 30% yield.  $^1\text{H}$  NMR (400 MHz,  $\text{CDCl}_3$ )  $\delta$  7.48 – 7.44 (m, 2H), 7.07 – 7.01 (m, 2H), 5.33 – 5.32 (m, 1H), 5.07 – 5.05 (m, 1H), 2.30 (s, 2H), 2.13 (s, 3H), 2.04 – 1.99 (m, 2H), 1.77 – 1.70 (m, 13H).  $^{13}\text{C}$  NMR (100 MHz,  $\text{CDCl}_3$ )  $\delta$  170.2, 150.0, 142.4, 138.8, 126.5, 121.3, 112.5, 63.8, 48.7, 42.4, 36.7, 28.6, 21.9; IR (film): 2902, 2848, 1755, 1629, 1601, 1507, 1452, 1372, 1329, 1008, 1123, 1097, 812. HRMS (ESI-TOF) exact mass calculated for  $\text{C}_{21}\text{H}_{26}\text{O}_2\text{Na}$   $[\text{M}+\text{Na}]^+$  333.1825, found 333.1820.

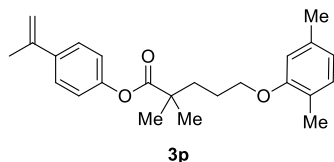

**3p**, Colorless oil, 50% yield.  $^1\text{H}$  NMR (400 MHz,  $\text{CDCl}_3$ )  $\delta$  7.53 – 7.47 (m, 2H), 7.07 – 7.02 (m, 3H), 6.72 – 6.66 (m, 2H), 5.40 – 5.37 (m, 1H), 5.13 – 5.10 (m, 1H), 4.06 – 4.00 (m, 2H), 2.35 (s, 3H), 2.23 (s, 3H), 2.19 (s, 3H), 1.95 – 1.91 (m, 4H), 1.42 (s, 6H).  $^{13}\text{C}$  NMR (100 MHz,  $\text{CDCl}_3$ )  $\delta$  175.2, 155.9, 149.3, 141.4, 137.7, 135.4, 129.3, 125.4, 122.6, 120.1, 119.6, 111.1, 110.8, 66.7, 41.3, 36.1, 28.6, 24.2, 24.1, 20.8, 20.3,



14.7; IR (film): 2930, 2872, 1747, 1722, 1601, 1507, 1457, 1385, 1307, 1206, 1168, 1129, 1099, 888, 734. HRMS (ESI-TOF) exact mass calculated for C<sub>24</sub>H<sub>31</sub>O<sub>3</sub>Na [M+Na]<sup>+</sup> 367.2273, found 367.2268.

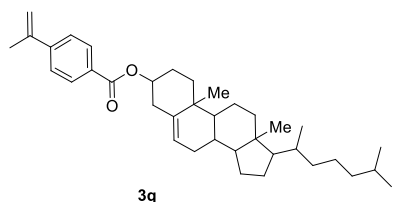

**3q**, White solid, mp 162-163, 50% yield. <sup>1</sup>H NMR (400 MHz, CDCl<sub>3</sub>) δ 8.02 – 7.97 (m, 2H), 7.52 – 7.49 (m, 2H), 5.46 (s, 1H), 5.44 – 5.40 (m, 1H), 5.20 – 5.17 (m, 1H), 4.91 – 4.81 (m, 1H), 2.49 – 2.44 (m, 2H), 2.17 – 2.16 (m, 3H), 2.07 – 1.89 (m, 4H), 1.87 – 1.70 (m, 2H), 1.63 – 1.46 (m, 6H), 1.41 – 1.27 (m, 4H), 1.20 – 0.96 (m, 13H), 0.93 (d, *J* = 6.5 Hz, 3H), 0.87 (dd, *J* = 6.6, 1.8 Hz, 6H), 0.69 (s, 3H). <sup>13</sup>C NMR (100 MHz, CDCl<sub>3</sub>) δ 165.9, 145.6, 142.6, 139.8, 129.7, 129.6, 125.4, 122.8, 114.5, 74.6, 56.8, 56.2, 50.1, 42.4, 29.8, 29.6, 28.3, 37.1, 36.7, 36.3, 35.9, 32.1, 32.0, 28.3, 28.1, 28.0, 24.4, 23.9, 22.9, 22.7, 21.8, 21.2, 19.5, 18.8, 12.0. IR (film): 2939, 2853, 1712, 1602, 1457, 1269, 1124, 1104, 1006, 851. HRMS (ESI-TOF) exact mass calculated for C<sub>37</sub>H<sub>54</sub>O<sub>2</sub>Na [M+Na]<sup>+</sup> 553.4018, found 553.4016.

### 2.3 Optimization studies of the reaction conditions

We optimized the reaction conditions using perfluorobutyl iodide **1a** and 4-methylisopropenylbenzene **3a** as model substrates. As shown in Table S2, a mixture of perfluorobutyl iodide, 4-methylisopropenylbenzene, 4-canopyridine, and B<sub>2</sub>pin<sub>2</sub> in ethyl acetate (EA) was stirred at 80 °C, forming the desired product **4a** in 39% yield (entry 1). Notably, the addition of organic base, such as DABCO, NMM, DMEDA, and DIPEA, increased the yield (entry 2-5, 47%~70%). Decreasing the amount of base led to a lower yield (entry 6). When the reaction performed at 60° C, the yield of **4a** was decreased (entry 7). Solvent screening found that tert-butyl methyl ether (MTBE) and trifluoromethyl benzene (PhCF<sub>3</sub>) were also suitable for the present reaction in good yield (entry 8-9). When the reaction occurred under irradiation with 10 W blue LED for 24 h, the corresponding product **4a** was obtained in only about 40% yield (entry 13-14).

**Table S2.** Optimization of the reaction conditions.<sup>[a]</sup>

Reaction scheme:  $C_4F_9-I$  (1a) + 4-cyanopyridine (2) + 4-methylisopropenylbenzene (3a)  $\xrightarrow[(2) \text{ 2M Na}_2\text{CO}_3, \text{ air}]{(1) \text{ B}_2\text{pin}_2, \text{ base, solvent, 80 } ^\circ\text{C}}$  4a

| Entry     | solvent            | base         | yield <sup>[b]</sup> |
|-----------|--------------------|--------------|----------------------|
| 1         | EA                 | --           | 39%                  |
| 2         | EA                 | DABCO        | 47%                  |
| 3         | EA                 | NMM          | 56%                  |
| 4         | EA                 | DMEDA        | 68%                  |
| 5         | EA                 | DIPEA        | 70%                  |
| 6         | EA                 | DIPEA        | 38% <sup>[c]</sup>   |
| 7         | EA                 | DIPEA        | 39% <sup>[d]</sup>   |
| 8         | EA                 | DIPEA        | 68% <sup>[e]</sup>   |
| 9         | PhCF <sub>3</sub>  | DIPEA        | 72%                  |
| <b>10</b> | <b>MTBE</b>        | <b>DIPEA</b> | <b>74%</b>           |
| 11        | CH <sub>3</sub> CN | DIPEA        | 53%                  |
| 13        | EA                 | DIPEA        | 41% <sup>[f]</sup>   |
| 14        | EA                 | --           | 43% <sup>[f]</sup>   |

[a] Reaction conditions: **1** (0.2 mmol), B<sub>2</sub>pin<sub>2</sub> (0.3 mmol), 4-cyanopyridine (0.3 mmol), 4-methylisopropenylbenzene (0.4 mmol), solvent (1.0 mL), base (0.2 mmol), 80 °C. [b] Isolated yield. [c] with 0.3 equiv. of DIPEA. [d] at 60 °C. [e] with 2.0 equiv. of DIPEA. [f] 24 h irradiated by 10 W blue LED at room temperature. MTBE = tert-butyl methyl ether; EA = ethyl acetate; THF = Tetrahydrofuran; DMEDA = N,N,N',N'-Tetraethylethylenediamine; NMM = 4-Methylmorpholine; DIPEA = Ethyldiisopropylamine; DABCO = 1,4-Diaza[2.2.2]bicyclooctane.

## 2.4 General procedure for the difunctionalization of alkenes

Under argon atmosphere, a sealed reaction tube was charged with a magnetic stir bar, perfluoroalkyl iodides or bromides (0.2 mmol), 4-cyanopyridine (0.3 mmol, 1.5 equiv), B<sub>2</sub>pin<sub>2</sub> (0.3 mmol, 1.5 equiv), alkene (4 mmol, 2.0 equiv). N, N-diisopropylethylamine (DIPEA, 0.4 mmol, 0.2 equiv) and MTBE (1 mL). The reaction mixture was stirred at 80 °C. After 24 h, the reaction mixture was cooled and quenched with 2 M Na<sub>2</sub>CO<sub>3</sub> aqueous solution (3 mL). Then, the reaction tube was stirred under air for another 15 minutes. The reaction mixture was extracted with EtOAc (3×10 mL).

The combined organic layer was dried over  $\text{Na}_2\text{SO}_4$  and then concentrated in vacuo to afford the crude product. This crude material was purified by preparative TLC on silica gel to afford the desired product.

### 3. Experiment studies on the Reaction mechanism

#### 3.1 $^{19}\text{F}$ NMR spectra analysis

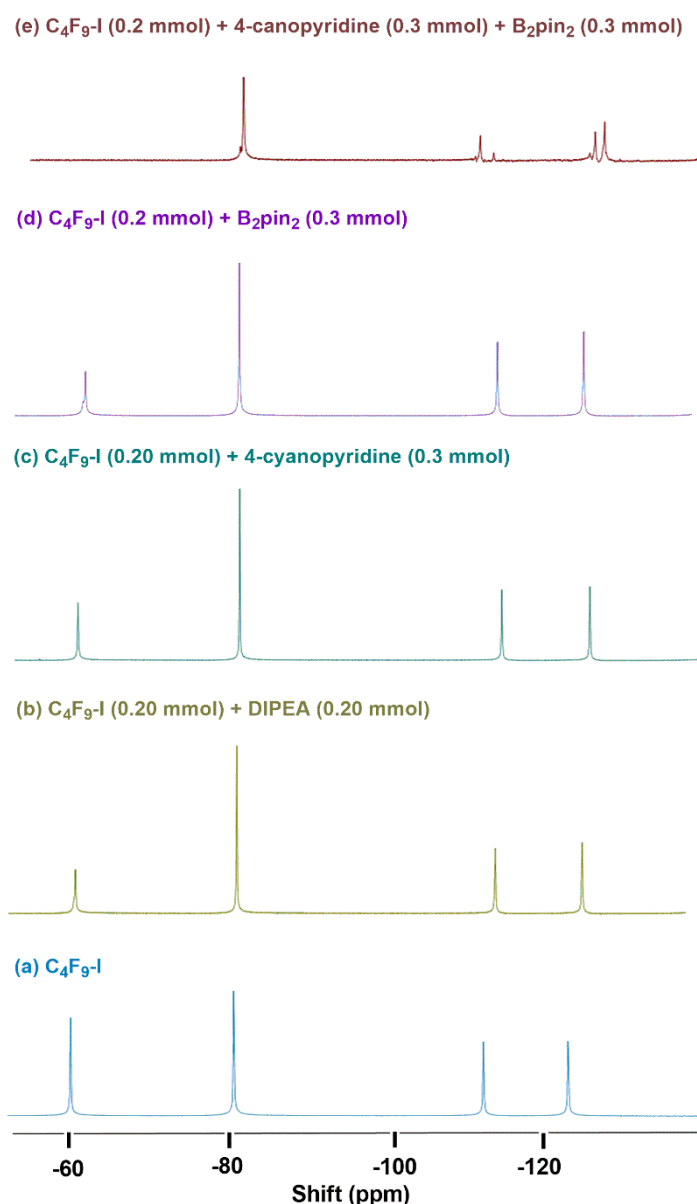

As shown above, samples with varied combination of reagents was measured with  $^{19}\text{F}$  NMR technique. The  $^{19}\text{F}$  NMR chemical shift at  $\sim 60$  ppm did not show any significantly changes for the mixture of  $\text{C}_4\text{F}_9\text{I}$  and  $\text{B}_2\text{pin}_2$  or DIPEA (see Figure S5a-

S5e), whereas it disappeared in a 1:1.5:1.5 mixtures of C<sub>4</sub>F<sub>9</sub>I, B<sub>2</sub>pin<sub>2</sub> and 4-cyanopyridine, suggesting that the cleavage of C-I bond is induced by 4-cyanopyridine-boryl radicals (see Figure S5d).

**Experimental procedure:** according to the general procedure for the difunctionalization of alkenes. A sealed reaction tube charged with a magnetic stir bar, the corresponding components in each reaction mixture using MTBE as solvent were placed in a heated oil bath at 80 °C. After 24 hours, the reaction tube was cooled to the room temperature, and then subjected to the <sup>19</sup>F NMR analysis.

### 3.2 Trapping the perfluoroalkyl radical by 1,1-diphenylethylene

The involvement of the perfluoroalkyl radical was further confirmed by radical trapping experiment with 1,1-diphenylethylene (shown in Table S2). When 1,1-diphenylethylene and hydrogen source (1,3,5-trimethyl-1,4-cyclohexadiene) was added in the reaction mixture of C<sub>8</sub>F<sub>17</sub>I, B<sub>2</sub>pin<sub>2</sub>, 4-cyanopyridine (20%), C<sub>8</sub>F<sub>17</sub> radical reacted with 1,1-diphenylethylene, the product **6** could be obtained in 50 yield. This result indicates the 4-cyanopyridine-boryl radical could activate the C<sub>8</sub>F<sub>17</sub>I to form the C<sub>8</sub>F<sub>17</sub> radical, then which could be trapped by 1,1-diphenylethylene.

**Table S2.** Radical trapping experiment.

|                                  |                          |
|----------------------------------|--------------------------|
|                                  |                          |
| <b>amount of 4-cyanopyridine</b> | <b>6, isolated yield</b> |
| 0.3 mmol (1.5 equiv.)            | 63%                      |
| 0.04 mmol (20%)                  | 50%                      |

**Experimental procedure:** A sealed reaction tube charged with a magnetic stir bar, **1g** (0.20 mmol), B<sub>2</sub>pin<sub>2</sub> (0.30 mmol, 1.5 equiv), 4-cyanopyridine, 1,3,5-trimethyl-1,4-cyclohexadiene (0.3 mmol, 1.5 equiv), MTBE (1 mL), 1,1-diphenylethylene (0.4 mmol,

2.0 equiv) were placed in a heated oil bath (80 °C). After 24 hours, the reaction was cooled and quenched with 2M Na<sub>2</sub>CO<sub>3</sub> aqueous solution (3 mL). The reaction mixture was stirred under air for another 15 minutes. The reaction mixture was extracted with EtOAc (3×10 mL). The combined organic layer was dried over Na<sub>2</sub>SO<sub>4</sub> and then concentrated in vacuo to afford the crude product. This crude material was purified by preparative TLC on silica gel (PE/EA=20:1) to afford the product **6**.

### 3.3 Trapping the intermediates by HRMS

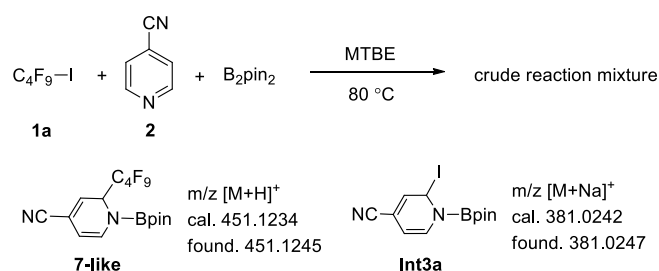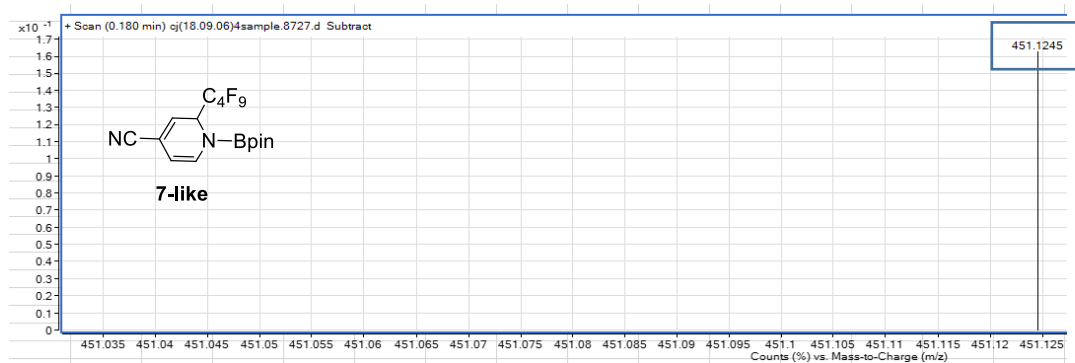

Figure S5

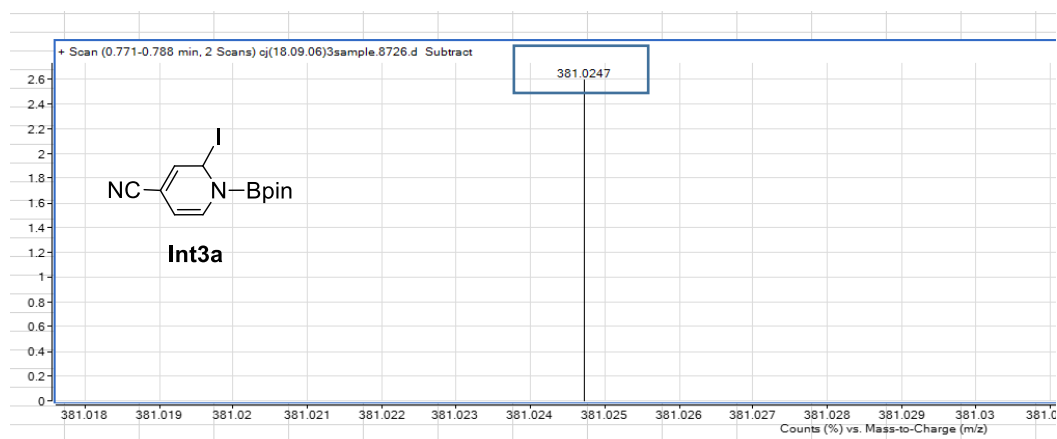

Figure S6

**Experimental procedure:** A sealed reaction tube charged with a magnetic stir bar, **1a** (0.20 mmol), B<sub>2</sub>pin<sub>2</sub> (0.30 mmol, 1.5 equiv), 4-cyanopyridine (0.3 mmol, 1.5 equiv),

and MTBE (1 mL) were placed in a heated oil bath (80 °C). After 24 hours, the reaction mixture was cooled to room temperature. The crude reaction mixture was subject to the HRMS analysis.

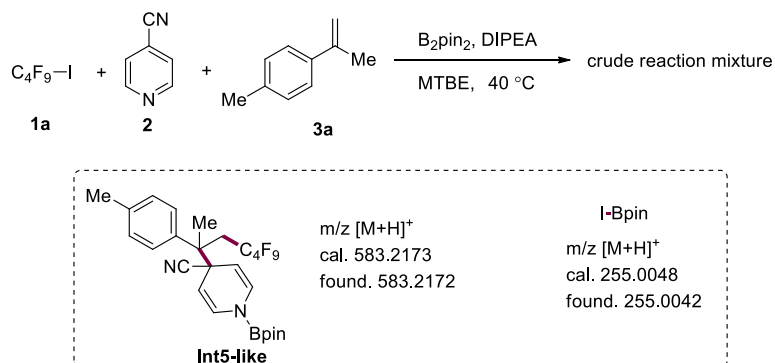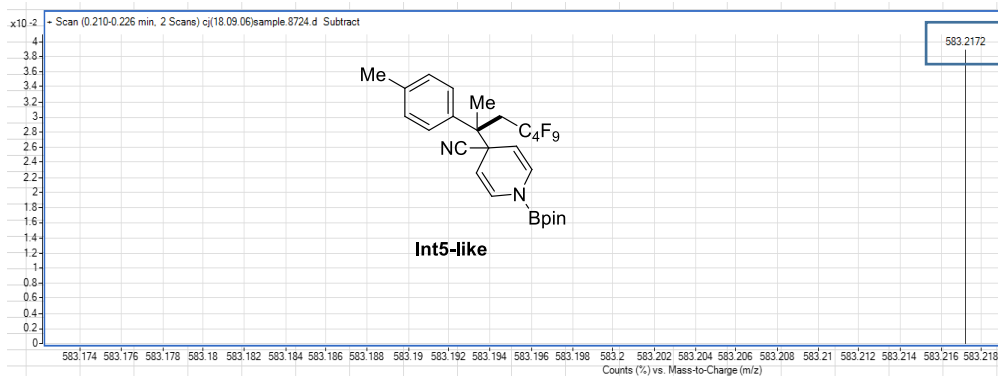

**Figure S7**

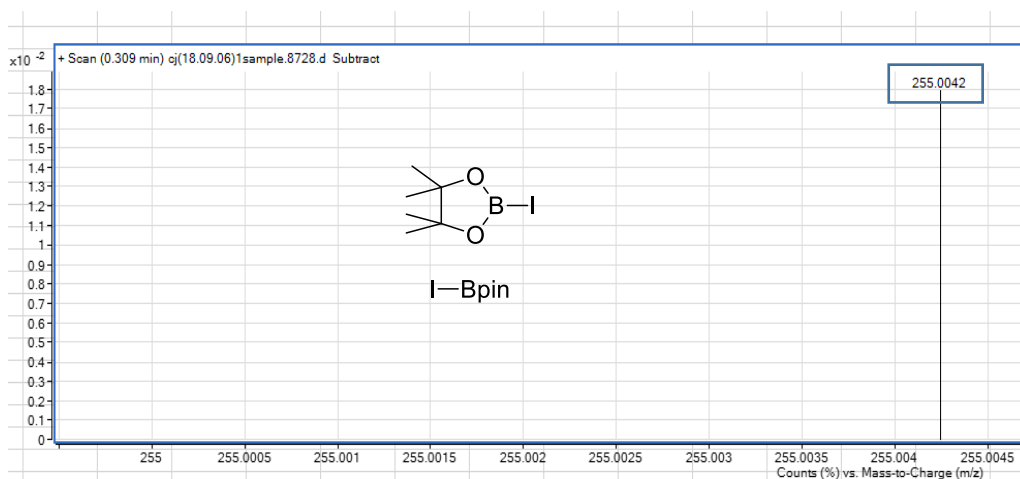

**Figure S8**

**Experimental procedure:** A sealed reaction tube charged with a magnetic stir bar, **1a** (0.20 mmol),  $B_2pin_2$  (0.30 mmol, 1.5 equiv), 4-cyanopyridine (0.3 mmol, 1.5 equiv), MTBE (1 mL), 4-methylisopropenylbenzene **3a** (0.4 mmol, 2.0 equiv), DIPEA (0.2

mmol, 1.0 equiv) were placed in a heated oil bath (40 °C). After 24 hours, the reaction mixture was cooled to room temperature. The crude reaction mixture was subject to the HRMS analysis.

### 3.4 Radical clock experiment

We performed a radical-clock experiment using substrate **3r**. After the generation of C<sub>4</sub>F<sub>9</sub> radical, which add to the alkene at the terminal position, and simultaneously the resulting alkyl radical coupled to the 4-cyanopyridine-boryl radicals at the C4 position to form the ring-opening product **5r**.

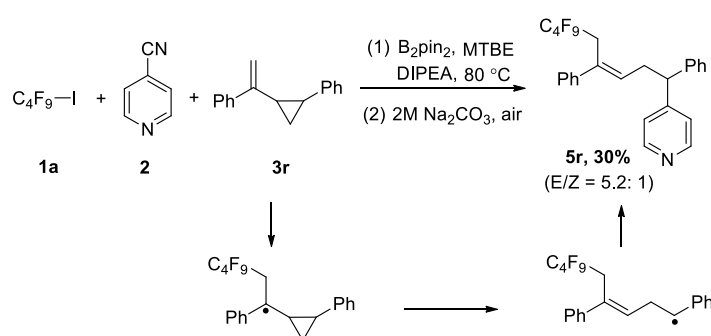

**Figure S9**

**Experimental procedure:** A sealed reaction tube charged with a magnetic stir bar, **1a** (0.20 mmol), B<sub>2</sub>pin<sub>2</sub> (0.30 mmol, 1.5 equiv), 4-cyanopyridine (0.3 mmol, 1.5 equiv), MTBE (1 mL), **3v** (0.4 mmol, 2.0 equiv), DIPEA (0.2 mmol, 1.0 equiv) were placed in a heated oil bath (80 °C). After 24 hours, the reaction was cooled and quenched with 2M Na<sub>2</sub>CO<sub>3</sub> aqueous solution (3 mL). The reaction tube was stirred under air for another 15 minutes. The reaction mixture was extracted with EtOAc (3×10 mL). The combined organic layer was dried over Na<sub>2</sub>SO<sub>4</sub> and then concentrated in vacuo to afford the crude product. This crude material was purified by preparative TLC on silica gel (PE/EA=20:1) to afford the product **5r** in 30% yield (E/Z = 5.2: 1).

**5r:** Pale-yellow oil; <sup>1</sup>H NMR (400 MHz, CDCl<sub>3</sub>) δ 8.61 – 8.50 (m, 1.60H), 8.49 – 8.43 (m, 0.32H), 7.36 – 7.18 (m, 11H), 7.11 – 7.05 (m, 0.50H), 7.04 – 7.01 (m, 0.50H), 5.91 (t, *J* = 7.1 Hz, 0.84H), 5.66 (t, *J* = 7.2 Hz, 0.16H), 4.11 – 4.04 (m, 0.85H), 4.01 – 3.94 (m, 0.14H), 3.25 – 3.13 (m, 1.73H), 3.08 – 3.01 (m, 0.36H), 3.00 – 2.94 (m, 1.79H), 2.80 – 2.75 (m, 0.38H). <sup>13</sup>C NMR (100 MHz, CDCl<sub>3</sub>) δ 153.4, 149.7, 133.6, 133.2,

130.7, 129.0, 128.8, 128.5, 128.3, 128.0, 127.6, 127.3, 127.1, 126.4, 123.5, 50.8, 50.5, 31.3 (t,  $J = 22.2$  Hz),  $^{13}\text{C}$ -NMR for  $\text{C}_4\text{F}_9$  could not be assigned.  $^{19}\text{F}$  NMR (376 MHz,  $\text{CDCl}_3$ )  $\delta$  -80.7 – 81.2 (m, 3F), -111.16 – -111.5 (m, 1.83F), -112.3 – -112.6 (m, 0.31F), -123.9 – -124.5 (m, 2F), -125.7 – -125.9 (m, 2F). IR (film): 3061, 3028, 2930, 1596, 1494, 1494, 1453, 1430, 1348, 1235, 1132, 878, 755; HRMS (ESI-TOF) exact mass calculated for  $\text{C}_{26}\text{H}_{20}\text{F}_9\text{N}$   $[\text{M}+\text{H}]^+$  518.1525, found 518.1525.

## 4. Spectroscopic Characterization of the Products

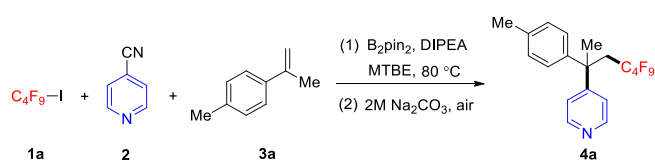

**4a:** Prepared following *general procedure* using **1a** (34.5  $\mu\text{L}$ , 0.2 mmol, 1.0 equiv), 4-cyanopyridine (31.3 mg, 0.3 mmol, 1.5 equiv),  $\text{B}_2\text{pin}_2$  (76.2 mg, 0.3 mmol, 1.5 equiv), **3a** (58.4  $\mu\text{L}$ , 0.4 mmol, 2.0 equiv), DIPEA (33.1  $\mu\text{L}$ , 0.4 mmol, 0.2 equiv) and MTBE (1 mL) at 80  $^\circ\text{C}$ . After 24 h, the reaction mixture was isolated with preparative TLC on silica (PE/EA = 20:1) to afford the product **4a** (63.5 mg, 74% yield).

**4a:** Pale-yellow oil;  $^1\text{H}$  NMR (400 MHz,  $\text{CDCl}_3$ )  $\delta$  8.55 – 8.51 (m, 2H), 7.14 – 7.10 (m, 4H), 7.05 – 7.02 (m, 2H), 3.02 – 2.91 (m, 2H), 2.32 (s, 3H), 1.89 (s, 3H).  $^{13}\text{C}$  NMR (100 MHz,  $\text{CDCl}_3$ )  $\delta$  156.9, 149.9, 143.3, 136.7, 129.3, 126.5, 121.4-107.6 (m, 4C,  $-\text{C}_4\text{F}_9$ ), 122.0, 43.9, 39.8 (t,  $J_{\text{C-F}} = 19.6$  Hz), 27.1, 20.9,  $^{13}\text{C}$ -NMR for  $\text{C}_4\text{F}_9$  could not be assigned.  $^{19}\text{F}$  NMR (376 MHz,  $\text{CDCl}_3$ )  $\delta$  -80.1 – -81.8 (m, 3F), -108.1 – -110.5 (m, 2F), -124.5 (m, 2F), -125.7 (m, 2F). IR (film): 3026, 2986, 2926, 1682, 1594, 1552, 1439, 1387, 1314, 1236, 1018, 995, 848  $\text{cm}^{-1}$ . HRMS (ESI-TOF) exact mass calculated for  $\text{C}_{19}\text{H}_{17}\text{F}_9\text{N}$   $[\text{M}+\text{H}]^+$  430.1212, found 430.1212.

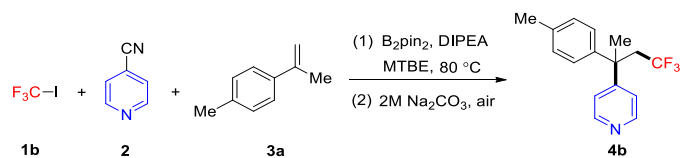

**4b:** Prepared following *general procedure* using prepared trifluoroiodomethane solution in MTBE (**1b**, 0.65 M), 4-cyanopyridine (31.3 mg, 0.3 mmol, 1.5 equiv),  $\text{B}_2\text{pin}_2$  (76.2 mg, 0.3 mmol, 1.5 equiv), **3a** (58.4  $\mu\text{L}$ , 0.4 mmol, 2.0 equiv), DIPEA (33.1



$\mu\text{L}$ , 0.4 mmol, 0.2 equiv) and MTBE (0.5 mL) at 80 °C. After 24 h, the reaction mixture was isolated with preparative TLC on silica (PE/EA = 20:1) to afford the product **4b** (30.2 mg, 54% yield).

**4b**: Pale-yellow oil;  $^1\text{H}$  NMR (400 MHz,  $\text{CDCl}_3$ )  $\delta$  8.53 (m, 2H), 7.12 (m, 4H), 7.02 (d,  $J = 8.3$  Hz, 2H), 3.01 (m, 2H), 2.32 (s, 3H), 1.82 (s, 3H).  $^{13}\text{C}$  NMR (100 MHz,  $\text{CDCl}_3$ )  $\delta$  157.2, 149.5, 143.0, 136.7, 129.3, 126.6, 126.3 (q,  $J_{\text{C-F}} = 278.9$  Hz), 122.3, 44.1 (q,  $J_{\text{C-F}} = 26.5$  Hz). 43.5, 26.8, 21.0.  $^{19}\text{F}$  NMR (376 MHz,  $\text{CDCl}_3$ )  $\delta$  -58.3. IR (film): 3026, 2985, 2925, 1594, 1514, 1411, 1366, 1260, 1121, 1036, 817  $\text{cm}^{-1}$ . HRMS (ESI-TOF) exact mass calculated for  $\text{C}_{16}\text{H}_{17}\text{F}_3\text{N}$  [ $\text{M}+\text{H}$ ] $^+$  280.1308 found 280.1308.

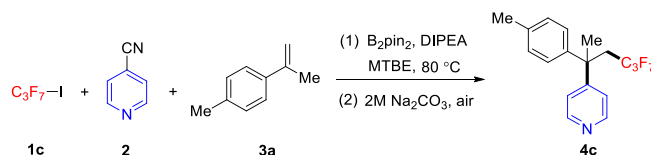

**4c**: Prepared following *general procedure* using **1c** (28.9  $\mu\text{L}$ , 0.2 mmol, 1.0 equiv), 4-cyanopyridine (31.3 mg, 0.3 mmol, 1.5 equiv),  $\text{B}_2\text{pin}_2$  (76.2 mg, 0.3 mmol, 1.5 equiv), **3a** (58.4  $\mu\text{L}$ , 0.4 mmol, 2.0 equiv), DIPEA (33.1  $\mu\text{L}$ , 0.4 mmol, 0.2 equiv) and MTBE (1 mL) at 80 °C. After 24 h, the reaction mixture was isolated with preparative TLC on silica (PE/EA = 20:1) to afford the product **4c** (54.6 mg, 72% yield).

**4c**: Pale-yellow oil;  $^1\text{H}$  NMR (400 MHz,  $\text{CDCl}_3$ )  $\delta$  8.52 (d,  $J = 4.9$  Hz, 2H), 7.20 – 7.07 (m, 4H), 7.06 – 7.01 (m, 2H), 3.02 – 2.89 (m, 2H), 2.32 (s, 3H), 1.89 (s, 3H).  $^{13}\text{C}$  NMR (100 MHz,  $\text{CDCl}_3$ )  $\delta$  157.1, 149.7, 143.2, 136.7, 129.3, 126.5, 122.1, 120.2-108.5 (m, 3C,  $-\text{C}_3\text{F}_7$ ), 43.9, 39.6 (t,  $J_{\text{C-F}} = 19.5$  Hz), 27.1, 20.9,  $^{13}\text{C}$ -NMR for  $\text{C}_3\text{F}_7$  could not be assigned.  $^{19}\text{F}$  NMR (376 MHz,  $\text{CDCl}_3$ )  $\delta$  -80.0 (t,  $J = 9.9$  Hz, 3F), -109.9 – -110.3 (m, 2F), -127.8 (m, 2F). IR (film): 2985, 2985, 2926, 1682, 1595, 1514, 1457, 1351, 1147, 1112, 884  $\text{cm}^{-1}$ . HRMS (ESI-TOF) exact mass calculated for  $\text{C}_{18}\text{H}_{17}\text{F}_7\text{N}$  [ $\text{M}+\text{H}$ ] $^+$  380.1244, found 380.1247.

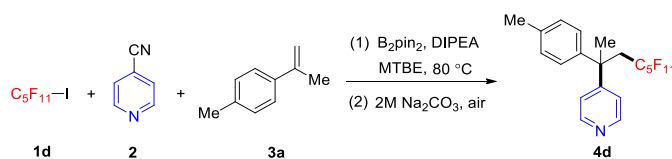

**4d**: Prepared following *general procedure* using **1d** (38.3  $\mu\text{L}$ , 0.2 mmol, 1.0 equiv), 4-cyanopyridine (31.3 mg, 0.3 mmol, 1.5 equiv),  $\text{B}_2\text{pin}_2$  (76.2 mg, 0.3 mmol, 1.5 equiv),

**3a** (58.4  $\mu\text{L}$ , 0.4 mmol, 2.0 equiv), DIPEA (33.1  $\mu\text{L}$ , 0.4 mmol, 0.2 equiv) and MTBE (1 mL) at 80  $^{\circ}\text{C}$ . After 24 h, the reaction mixture was isolated with preparative TLC on silica (PE/EA = 20:1) to afford the product **4d** (67.1 mg, 70% yield).

**4d**: Pale-yellow oil;  $^1\text{H}$  NMR (400 MHz,  $\text{CDCl}_3$ )  $\delta$  8.55 – 8.50 (m, 2H), 7.14 – 7.10 (m, 4H), 7.04 (d,  $J$  = 8.3 Hz, 2H), 3.02 – 2.90 (m, 2H), 2.32 (s, 3H), 1.89 (m, 3H).  $^{13}\text{C}$  NMR (100 MHz,  $\text{CDCl}_3$ )  $\delta$  156.9, 149.9, 143.3, 136.7, 129.3, 126.5, 122.0, 119.2 – 107.7 (m, 5C,  $-\text{C}_5\text{F}_{11}$ ), 43.9, 39.9 (t,  $J_{\text{C-F}}$  = 19.5 Hz), 27.1, 20.9,  $^{13}\text{C}$ -NMR for  $\text{C}_5\text{F}_{11}$  could not be assigned.  $^{19}\text{F}$  NMR (376 MHz,  $\text{CDCl}_3$ )  $\delta$  -80.5 – -80.2 (m, 3F), -107.7 – -110.7 (m, 2F), -121.0 – -122.7 (m, 2F), -123.2 – -124.8 (m, 2F), -125.6 – -127.6 (m, 2F). IR (film): 3026, 2986, 2927, 1594, 1514, 1411, 1306, 1239, 1140, 1040, 741  $\text{cm}^{-1}$ . HRMS (ESI-TOF) exact mass calculated for  $\text{C}_{20}\text{H}_{17}\text{F}_{11}\text{N}$   $[\text{M}+\text{H}]^+$  480.1180 found 480.1183.

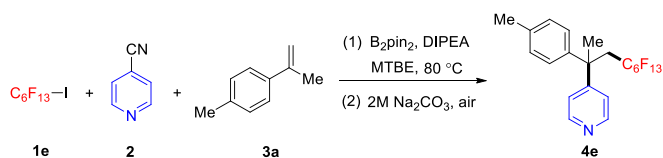

**4e**: Prepared following *general procedure* using **1e** (43.2  $\mu\text{L}$ , 0.2 mmol, 1.0 equiv), 4-cyanopyridine (31.3 mg, 0.3 mmol, 1.5 equiv),  $\text{B}_2\text{pin}_2$  (76.2 mg, 0.3 mmol, 1.5 equiv), **3a** (58.4  $\mu\text{L}$ , 0.4 mmol, 2.0 equiv), DIPEA (33.1  $\mu\text{L}$ , 0.4 mmol, 0.2 equiv) and MTBE (1 mL) at 80  $^{\circ}\text{C}$ . After 24 h, the reaction mixture was isolated with preparative TLC on silica (PE/EA = 20:1) to afford the product **4e** (80.4 mg, 76% yield).

**4e**: Pale-yellow oil;  $^1\text{H}$  NMR (400 MHz,  $\text{CDCl}_3$ )  $\delta$  8.55 – 8.49 (m, 2H), 7.14 – 7.10 (m, 4H), 7.04 (d,  $J$  = 8.3 Hz, 2H), 3.03 – 2.91 (m, 2H), 2.32 (s, 3H), 1.89 (s, 3H).  $^{13}\text{C}$  NMR (100 MHz,  $\text{CDCl}_3$ )  $\delta$  156.8, 149.8, 143.2, 136.6, 129.2, 126.4, 121.9, 119.4 – 107.5 (m, 6C,  $-\text{C}_5\text{F}_{13}$ ), 44.0, 39.9 (t,  $J_{\text{C-F}}$  = 19.5 Hz), 27.1, 20.9.  $^{13}\text{C}$ -NMR for  $\text{C}_6\text{F}_{13}$  could not be assigned.  $^{19}\text{F}$  NMR (376 MHz,  $\text{CDCl}_3$ )  $\delta$  -80.4 – -81.3 (m, 3F), -108.1 – -110.1 (m, 2F), -121.1 – -121.8 (m, 2F), -122.1 – -123.2 (m, 2F), -123.4 – -124.0 (m, 2F), -125.8 – -126.6 (m, 2F). IR (film): 3025, 2986, 2927, 1595, 1514, 1410, 1387, 1239, 1144, 1119, 1050, 813  $\text{cm}^{-1}$ . HRMS (ESI-TOF) exact mass calculated for  $\text{C}_{21}\text{H}_{17}\text{F}_{13}\text{N}$   $[\text{M}+\text{H}]^+$  530.1148 found 530.1149.

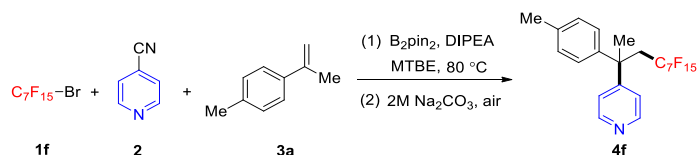

**4f:** Prepared following *general procedure* using **1f** (47.4  $\mu\text{L}$ , 0.2 mmol, 1.0 equiv), 4-cyanopyridine (31.3 mg, 0.3 mmol, 1.5 equiv),  $\text{B}_2\text{pin}_2$  (76.2 mg, 0.3 mmol, 1.5 equiv), **3a** (58.4  $\mu\text{L}$ , 0.4 mmol, 2.0 equiv), DIPEA (33.1  $\mu\text{L}$ , 0.4 mmol, 0.2 equiv) and MTBE (1 mL) at 80  $^\circ\text{C}$ . After 24 h, the reaction mixture was isolated with preparative TLC on silica (PE/EA = 20:1) to afford the product **4f** (60.2 mg, 52% yield).

**4f:** Pale-yellow oil;  $^1\text{H}$  NMR (400 MHz,  $\text{CDCl}_3$ )  $\delta$  8.55 – 8.50 (m, 2H), 7.14 – 7.10 (m, 4H), 7.05 – 7.02 (m, 2H), 3.03 – 2.90 (m, 2H), 2.32 (s, 3H), 1.89 (s, 3H).  $^{13}\text{C}$  NMR (100 MHz,  $\text{CDCl}_3$ )  $\delta$  156.9, 149.9, 143.3, 136.7, 129.3, 126.5, 122.1, 121.3 – 108.2 (m, 7C,  $-\text{C}_7\text{F}_{15}$ ), 44.0, 39.9 (t,  $J_{\text{C-F}} = 19.6$  Hz), 27.1, 20.9,  $^{13}\text{C}$ -NMR for  $\text{C}_7\text{F}_{15}$  could not be assigned.  $^{19}\text{F}$  NMR (376 MHz,  $\text{CDCl}_3$ )  $\delta$  -80.6 – -81.0 (m, 3F), -108.5 – -109.4 (m, 2F), -121.2 – -121.6 (m, 2F), -121.7 – -122.4 (m, 2F), -122.6 – -123.2 (m, 2F), -123.5 – -123.8 (m, 2F), -126.0 – -126.4 (m, 2F). IR (film): 3026, 2896, 2927, 1595, 1514, 1363, 1211, 1148, 1043, 1005, 815  $\text{cm}^{-1}$ . HRMS (ESI-TOF) exact mass calculated for  $\text{C}_{22}\text{H}_{17}\text{F}_{15}\text{N}$   $[\text{M}+\text{H}]^+$  580.1116 found 580.1116.

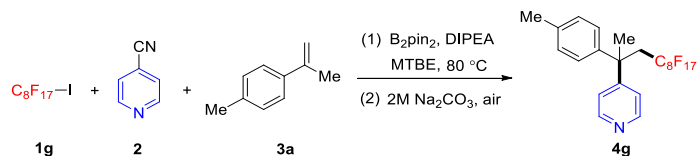

**4g:** Prepared following *general procedure* using **1g** (52.8  $\mu\text{L}$ , 0.2 mmol, 1.0 equiv), 4-cyanopyridine (31.3 mg, 0.3 mmol, 1.5 equiv),  $\text{B}_2\text{pin}_2$  (76.2 mg, 0.3 mmol, 1.5 equiv), **3a** (58.4  $\mu\text{L}$ , 0.4 mmol, 2.0 equiv), DIPEA (33.1  $\mu\text{L}$ , 0.4 mmol, 0.2 equiv) and MTBE (1 mL) at 80  $^\circ\text{C}$ . After 24 h, the reaction mixture was isolated with preparative TLC on silica (PE/EA = 20:1) to afford the product **4g** (89.3 mg, 71% yield).

**4g:** gum;  $^1\text{H}$  NMR (400 MHz,  $\text{CDCl}_3$ )  $\delta$  8.56 – 8.50 (m, 2H), 7.14 – 7.10 (m, 4H), 7.04 (d,  $J = 8.3$  Hz, 2H), 3.02 – 2.90 (m, 2H), 2.32 (s, 3H), 1.89 (s, 3H).  $^{13}\text{C}$  NMR (100 MHz,  $\text{CDCl}_3$ )  $\delta$  156.9, 149.9, 143.3, 136.7, 129.3, 126.5, 122.1, 121.4 – 107.0 (m, 8C,  $-\text{C}_8\text{F}_{17}$ ), 44.0, 39.9 (t,  $J_{\text{C-F}} = 19.6$  Hz), 27.1, 20.9,  $^{13}\text{C}$ -NMR for  $\text{C}_8\text{F}_{17}$  could not be assigned.  $^{19}\text{F}$  NMR (376 MHz,  $\text{CDCl}_3$ )  $\delta$  -80.88 – -80.9 (m, 3F), -108.1 – -109.9 (m,

2F), -121.3 – -121.5 (m, 2F), -121.8 – -122.0 (m, 4F), -122.6 – -122.9 (m, 2F), -123.5 – -123.7 (m, 2F), -125.8 – -126.5 (m, 2F). IR (film): 3026, 2986, 2926, 1594, 1514, 1410, 1363, 1240, 1207, 1150, 1115, 1073, 1036, 816  $\text{cm}^{-1}$ . HRMS (ESI-TOF) exact mass calculated for  $\text{C}_{23}\text{H}_{17}\text{F}_{17}\text{N}$   $[\text{M}+\text{H}]^+$  630.1084 found 630.1082.

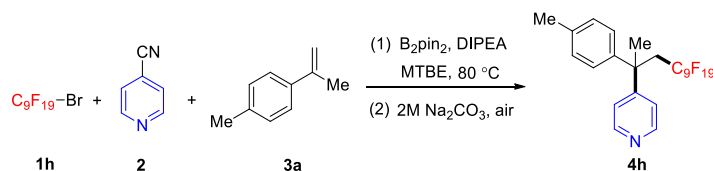

**4h**: Prepared following *general procedure* using **1h** (109.8 mg, 0.2 mmol, 1.0 equiv), 4-cyanopyridine (31.3 mg, 0.3 mmol, 1.5 equiv),  $\text{B}_2\text{pin}_2$  (76.2 mg, 0.3 mmol, 1.5 equiv), **3a** (58.4  $\mu\text{L}$ , 0.4 mmol, 2.0 equiv), DIPEA (33.1  $\mu\text{L}$ , 0.4 mmol, 0.2 equiv) and MTBE (1 mL) at 80 °C. After 24 h, the reaction mixture was isolated with preparative TLC on silica (PE/EA = 20:1) to afford the product **4h** (70.6 mg, 52% yield).

**4h**: gum;  $^1\text{H}$  NMR (400 MHz,  $\text{CDCl}_3$ )  $\delta$  8.57 – 8.48 (m, 2H), 7.15 – 7.10 (m, 4H), 7.05 – 7.02 (m, 2H), 3.03 – 2.89 (m, 2H), 2.32 (s, 3H), 1.89 (s, 3H).  $^{13}\text{C}$  NMR (100 MHz,  $\text{CDCl}_3$ )  $\delta$  156.8, 149.8, 143.2, 136.6, 129.2, 126.4, 121.9, 119.9 – 107.2 (m, 9C, - $\text{C}_9\text{F}_{19}$ ), 43.8, 39.8 (t,  $J_{\text{C-F}} = 19.6$  Hz), 27.0, 20.8,  $^{13}\text{C}$ -NMR for  $\text{C}_9\text{F}_{19}$  could not be assigned.  $^{19}\text{F}$  NMR (376 MHz,  $\text{CDCl}_3$ )  $\delta$  -80.8 – -80.7 (m, 3F), -108.4 – -109.3 (m, 2F), -121.1 – -121.5 (m, 2F), -121.7 – -122.2 (m, 6F), -122.6 – -123.2 (m, 2F), -123.4 – -123.8 (m, 2F), -126.0 – -126.4 (m, 2F). IR (film): 3027, 2986, 2927, 1595, 1515, 1456, 1387, 1211, 1149, 1122, 1044, 912, 816  $\text{cm}^{-1}$ . HRMS (ESI-TOF) exact mass calculated for  $\text{C}_{24}\text{H}_{17}\text{F}_{19}\text{N}$   $[\text{M}+\text{H}]^+$  680.1052 found 680.1053.

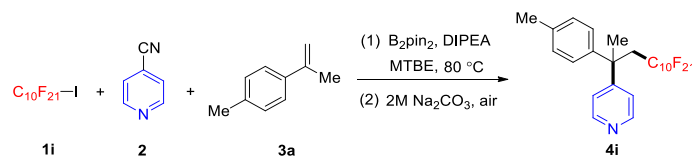

**4i**: Prepared following *general procedure* using **1i** (129.2 mg, 0.2 mmol, 1.0 equiv), 4-cyanopyridine (31.3 mg, 0.3 mmol, 1.5 equiv),  $\text{B}_2\text{pin}_2$  (76.2 mg, 0.3 mmol, 1.5 equiv), **3a** (58.4  $\mu\text{L}$ , 0.4 mmol, 2.0 equiv), DIPEA (33.1  $\mu\text{L}$ , 0.4 mmol, 0.2 equiv) and MTBE (1 mL) at 80 °C. After 24 h, the reaction mixture was isolated with preparative TLC on silica (PE/EA = 20:1) to afford the product **4i** (90.4 mg, 62% yield).

**4i**: gum;  $^1\text{H}$  NMR (400 MHz,  $\text{CDCl}_3$ )  $\delta$  8.55 – 8.51 (m, 2H), 7.14 – 7.10 (m, 4H), 7.04 (d,  $J = 8.2$  Hz, 2H), 3.03 – 2.89 (m, 2H), 2.32 (s, 3H), 1.89 (s, 3H).  $^{13}\text{C}$  NMR (100 MHz,  $\text{CDCl}_3$ )  $\delta$  156.9, 149.9, 143.3, 136.7, 129.3, 126.5, 122.0, 119.3 – 107.2 (m, 10C,  $-\text{C}_{10}\text{F}_{21}$ ), 44.0, 39.9 (t,  $J_{\text{C-F}} = 19.6$  Hz), 27.1, 20.8,  $^{13}\text{C}$ -NMR for  $\text{C}_{10}\text{F}_{21}$  could not be assigned.  $^{19}\text{F}$  NMR (376 MHz,  $\text{CDCl}_3$ )  $\delta$  -80.4 – -81.6 (m, 3F), -108.4 – -109.5 (m, 2F), -121.1 – -121.5 (m, 2F), -121.54 – -122.6 (m, 8F), -122.7 – -123.4 (m, 2F), -123.6 – -124.0 (m, 2F), -125.9 – -126.7 (m, 2F). IR (film): 3025, 2983, 2926, 1593, 1514, 1410, 1305, 1159, 1118, 1074, 1083, 817  $\text{cm}^{-1}$ . HRMS (ESI-TOF) exact mass calculated for  $\text{C}_{25}\text{H}_{17}\text{F}_{21}\text{N}$   $[\text{M}+\text{H}]^+$  730.1020 found 730.1021.

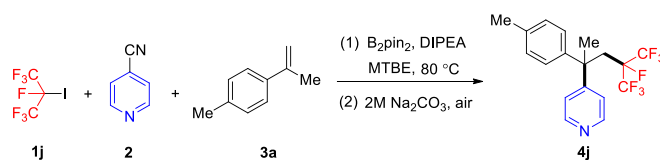

**4j**: Prepared following *general procedure* using **1j** (28.5  $\mu\text{L}$ , 0.2 mmol, 1.0 equiv), 4-cyanopyridine (31.3 mg, 0.3 mmol, 1.5 equiv),  $\text{B}_2\text{pin}_2$  (76.2 mg, 0.3 mmol, 1.5 equiv), **3a** (58.4  $\mu\text{L}$ , 0.4 mmol, 2.0 equiv), DIPEA (33.1  $\mu\text{L}$ , 0.4 mmol, 0.2 equiv) and MTBE (1 mL) at 80  $^\circ\text{C}$ . After 24 h, the reaction mixture was isolated with preparative TLC on silica (PE/EA = 20:1) to afford the product **4j** (34.2 mg, 45% yield).

**4j**: Colorless oil;  $^1\text{H}$  NMR (400 MHz,  $\text{CDCl}_3$ )  $\delta$  8.53 – 8.49 (m, 2H), 7.15 – 7.07 (m, 4H), 7.04 – 7.00 (m, 2H), 3.01 (d,  $J = 13.3$  Hz, 2H), 2.32 (s, 3H), 1.84 (s, 3H).  $^{13}\text{C}$  NMR (100 MHz,  $\text{CDCl}_3$ )  $\delta$  157.0, 149.7, 143.5, 136.6, 129.1, 126.8, 122.4, 119.6 (d,  $J_{\text{C-F}} = 28.2$  Hz), 93.6 – 89.8 (m, 2C,  $-\text{2CF}_3$ ), 45.0, 36.9 (d,  $J_{\text{C-F}} = 17.8$  Hz). 27.4, 20.9,  $^{13}\text{C}$ -NMR for  $-\text{2CF}_3$  could not be assigned.  $^{19}\text{F}$  NMR (376 MHz,  $\text{CDCl}_3$ )  $\delta$  -77.1 – -77.7 (m, 6F), -188.7 – -188.1 (m, 1F). IR (film): 3025, 2983, 2926, 1593, 1514, 1410, 1359, 1305, 1269, 1159, 1118, 1038, 995, 817  $\text{cm}^{-1}$ . HRMS (ESI-TOF) exact mass calculated for  $\text{C}_{18}\text{H}_{17}\text{F}_7\text{N}$   $[\text{M}+\text{H}]^+$  380.1244 found 380.1249.

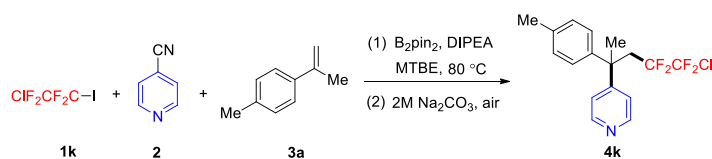

**4k**: Prepared following *general procedure* using **1k** (37.8  $\mu\text{L}$ , 0.2 mmol, 1.0 equiv), 4-cyanopyridine (31.3 mg, 0.3 mmol, 1.5 equiv),  $\text{B}_2\text{pin}_2$  (76.2 mg, 0.3 mmol, 1.5 equiv),

**3a** (58.4  $\mu\text{L}$ , 0.4 mmol, 2.0 equiv), DIPEA (33.1  $\mu\text{L}$ , 0.4 mmol, 0.2 equiv) and MTBE (1 mL) at 80  $^{\circ}\text{C}$ . After 24 h, the reaction mixture was isolated with preparative TLC on silica (PE/EA = 20:1) to afford the product **4k** (41.4 mg, 60% yield).

**4k**: Colorless oil;  $^1\text{H}$  NMR (400 MHz,  $\text{CDCl}_3$ )  $\delta$  8.54 – 8.49 (m, 2H), 7.14 – 7.10 (m, 4H), 7.06 – 7.02 (m, 2H), 3.03 – 2.91 (m, 2H), 2.32 (s, 3H), 1.89 (s, 3H).  $^{13}\text{C}$  NMR (100 MHz,  $\text{CDCl}_3$ )  $\delta$  156.8, 149.8, 143.2, 136.5, 129.1, 126.4, 122.0, 121.0 – 114.0 (m, 2C,  $\text{CF}_2\text{CF}_2$ ), 43.9, 39.7 (t,  $J_{\text{C-F}} = 19.7$  Hz), 26.9, 20.8,  $^{13}\text{C}$ -NMR for  $\text{CF}_2\text{CF}_2$  could not be assigned.  $^{19}\text{F}$  NMR (376 MHz,  $\text{CDCl}_3$ )  $\delta$  -71.6 – -72.4 (m, 2F), -108.2 – -110.1 (m, 2F). IR (film): 3025, 2984, 2925, 1595, 1514, 1410, 1259, 1211, 1151, 1087, 1038, 948, 817, 593  $\text{cm}^{-1}$ . HRMS (ESI-TOF) exact mass calculated for  $\text{C}_{17}\text{H}_{17}\text{ClF}_4\text{N}$   $[\text{M}+\text{H}]^+$  346.0980 found 346.0981.

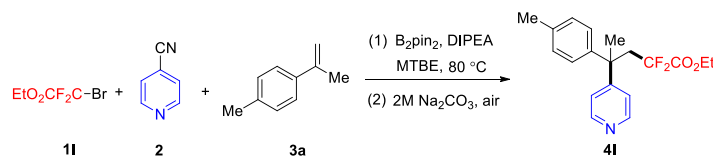

**4l**: Prepared following *general procedure* using **1l** (25.7  $\mu\text{L}$ , 0.2 mmol, 1.0 equiv), 4-cyanopyridine (31.3 mg, 0.3 mmol, 1.5 equiv),  $\text{B}_2\text{pin}_2$  (76.2 mg, 0.3 mmol, 1.5 equiv), **3a** (58.4  $\mu\text{L}$ , 0.4 mmol, 2.0 equiv), DIPEA (33.1  $\mu\text{L}$ , 0.4 mmol, 0.2 equiv) and MTBE (1 mL) at 80  $^{\circ}\text{C}$ . After 24 h, the reaction mixture was isolated with preparative TLC on silica (PE/EA = 20:1) to afford the product **4l** (30.0 mg, 45% yield).

**4l**: Colorless oil;  $^1\text{H}$  NMR (400 MHz,  $\text{CDCl}_3$ )  $\delta$  8.53 – 8.46 (m, 2H), 7.12 – 7.07 (m, 4H), 7.04 – 7.01 (m, 2H), 3.86 – 3.79 (m, 2H), 3.08 – 2.98 (m, 2H), 2.31 (s, 3H), 1.80 (s, 3H), 1.18 (t,  $J = 7.2$  Hz, 3H).  $^{13}\text{C}$  NMR (100 MHz,  $\text{CDCl}_3$ )  $\delta$  163.7 (t,  $J_{\text{C-F}} = 32.3$  Hz), 157.5, 149.6, 142.7, 136.6, 129.0, 127.2, 122.4, 115.9 (t,  $J_{\text{C-F}} = 251.9$  Hz), 62.9, 44.2 (t,  $J_{\text{C-F}} = 22.4$  Hz), 43.7, 27.3, 20.9, 13.7.  $^{19}\text{F}$  NMR (376 MHz,  $\text{CDCl}_3$ )  $\delta$  -95.2 – -100.6 (m). IR (film): 2983, 2927, 1770, 1712, 1594, 1551, 1514, 1455, 1259, 1211, 1087, 835, 593  $\text{cm}^{-1}$ . HRMS (ESI-TOF) exact mass calculated for  $\text{C}_{19}\text{H}_{22}\text{F}_2\text{NO}_2$  334.1613  $[\text{M}+\text{H}]^+$  found 334.1614.

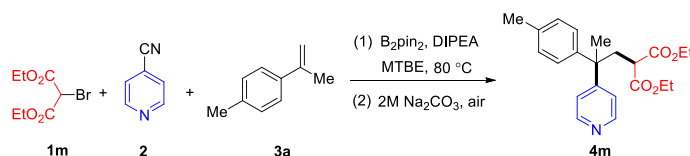

**4m**: Prepared following *general procedure* using **1m** (34.1  $\mu\text{L}$ , 0.2 mmol, 1.0 equiv), 4-cyanopyridine (31.3 mg, 0.3 mmol, 1.5 equiv),  $\text{B}_2\text{pin}_2$  (76.2 mg, 0.3 mmol, 1.5 equiv), **3a** (58.4  $\mu\text{L}$ , 0.4 mmol, 2.0 equiv), DIPEA (33.1  $\mu\text{L}$ , 0.4 mmol, 0.2 equiv) and MTBE (1 mL) at 80  $^\circ\text{C}$ . After 24 h, the reaction mixture was isolated with preparative TLC on silica (PE/EA = 20:1) to afford the product **4m** (36.2 mg, 49% yield).

**4m**: Colorless oil;  $^1\text{H}$  NMR (400 MHz,  $\text{CDCl}_3$ )  $\delta$  8.59 – 8.40 (m, 2H), 7.14 – 7.04 (m, 6H), 4.09 – 3.96 (m, 4H), 3.17 – 3.13 (m, 1H), 2.90 – 2.80 (m, 2H), 2.30 (s, 3H), 1.58 (s, 3H), 1.21 – 1.14 (m, 6H).  $^{13}\text{C}$  NMR (100 MHz,  $\text{CDCl}_3$ )  $\delta$  169.8, 169.6, 157.8, 149.6, 142.8, 136.3, 129.1, 127.4, 122.7, 61.7, 61.7, 48.8, 45.8, 39.0, 26.9, 20.9, 14.0, 13.9. IR (film): 2980, 2936, 1732, 1594, 1513, 1463, 1277, 1149, 1019, 819, 586  $\text{cm}^{-1}$ . HRMS (ESI-TOF) exact mass calculated for  $\text{C}_{22}\text{H}_{28}\text{NO}_4$   $[\text{M}+\text{H}]^+$  370.2013 found 370.2013.

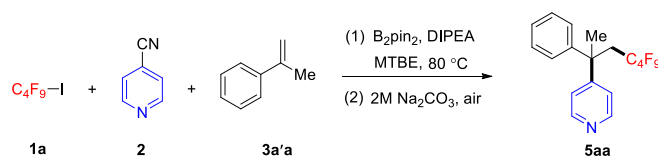

**5aa**: Prepared following *general procedure* using **1a** (34.5  $\mu\text{L}$ , 0.2 mmol, 1.0 equiv), 4-cyanopyridine (31.3 mg, 0.3 mmol, 1.5 equiv),  $\text{B}_2\text{pin}_2$  (76.2 mg, 0.3 mmol, 1.5 equiv), 2-Phenyl-1-propene (52.0  $\mu\text{L}$ , 0.4 mmol, 2.0 equiv), DIPEA (33.1  $\mu\text{L}$ , 0.4 mmol, 0.2 equiv) and MTBE (1 mL) at 80  $^\circ\text{C}$ . After 24 h, the reaction mixture was isolated with preparative TLC on silica (PE/EA = 20:1) to afford the product **5aa** (49.8 mg, 60% yield).

**5aa**: Colorless oil;  $^1\text{H}$  NMR (400 MHz,  $\text{CDCl}_3$ )  $\delta$  8.55 – 8.52 (m, 2H), 7.33 – 7.28 (m, 2H), 7.26 – 7.22 (m, 1H), 7.17 – 7.12 (m, 4H), 3.04 – 2.93 (m, 2H), 1.91 (s, 3H).  $^{13}\text{C}$  NMR (100 MHz,  $\text{CDCl}_3$ )  $\delta$  156.7, 150.0, 146.2, 128.6, 127.0, 126.6, 122.1, 121.4–109.6 (m, 4C,  $-\text{C}_4\text{F}_9$ ), 44.3, 39.8 (t,  $J_{\text{C-F}} = 19.6$  Hz), 27.1,  $^{13}\text{C}$ -NMR for  $\text{C}_4\text{F}_9$  could not be assigned.  $^{19}\text{F}$  NMR (376 MHz,  $\text{CDCl}_3$ )  $\delta$  -81.0 – -81.1 (m, 3F), -109.1 – -109.4 (m, 2F), -124.5 – -124.5 (m, 2F), -125.6 – -125.7 (m, 2F). IR (film): 3061, 3028, 2928, 1594, 1496, 1446, 1352, 1221, 1133, 1049, 1016, 874, 734  $\text{cm}^{-1}$ . HRMS (ESI-TOF) exact mass calculated for  $\text{C}_{18}\text{H}_{15}\text{F}_9\text{N}$   $[\text{M}+\text{H}]^+$  416.1055 found 416.1059.

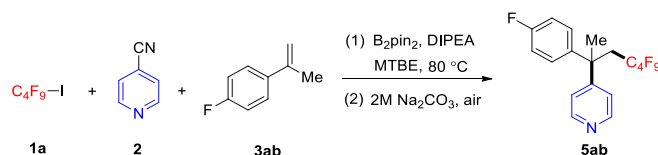

**5ab:** Prepared following *general procedure* using **1a** (34.5  $\mu\text{L}$ , 0.2 mmol, 1.0 equiv), 4-cyanopyridine (31.3 mg, 0.3 mmol, 1.5 equiv),  $\text{B}_2\text{pin}_2$  (76.2 mg, 0.3 mmol, 1.5 equiv), **3ab** (58.0  $\mu\text{L}$ , 0.4 mmol, 2.0 equiv), DIPEA (33.1  $\mu\text{L}$ , 0.4 mmol, 0.2 equiv) and MTBE (1 mL) at 80  $^\circ\text{C}$ . After 24 h, the reaction mixture was isolated with preparative TLC on silica (PE/EA = 20:1) to afford the product **5ab** (65.0 mg, 75% yield).

**5ab:** Pale-yellow oil;  $^1\text{H}$  NMR (400 MHz,  $\text{CDCl}_3$ )  $\delta$  8.54 (d,  $J = 5.2$  Hz, 2H), 7.15 – 7.10 (m, 4H), 7.05 – 6.94 (m, 2H), 3.00 – 2.89 (m, 2H), 1.89 (s, 3H).  $^{13}\text{C}$  NMR (100 MHz,  $\text{CDCl}_3$ )  $\delta$  161.5 (d,  $J_{\text{C-F}} = 247.0$  Hz), 156.7, 149.8, 141.6 (d,  $J_{\text{C-F}} = 3.6$  Hz), 128.3 (d,  $J_{\text{C-F}} = 7.9$  Hz), 122.0, 120.2–110.6 (m, 4C,  $-\text{C}_4\text{F}_9$ ), 115.3 (d,  $J_{\text{C-F}} = 21.4$  Hz), 43.9, 39.9 (t,  $J_{\text{C-F}} = 19.6$  Hz), 27.5,  $^{13}\text{C}$ -NMR for  $\text{C}_4\text{F}_9$  could not be assigned.  $^{19}\text{F}$  NMR (376 MHz,  $\text{CDCl}_3$ )  $\delta$  -80.9 – -81.2 (m, 3F), -109.1 – -109.7 (m, 2F), -114.9 – -116.3 (m, 1F), -124.3 – -124.6 (m, 2F), -125.5 – -125.9 (m, 2F). IR (film): 2986, 2951, 1595, 1511, 1471, 1353, 1232, 1167, 1133, 1015, 875, 735  $\text{cm}^{-1}$ . HRMS (ESI-TOF) exact mass calculated for  $\text{C}_{18}\text{H}_{14}\text{F}_{10}\text{N}$   $[\text{M}+\text{H}]^+$  434.0961 found 434.0962.

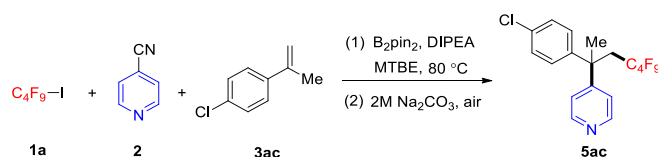

**5ac:** Prepared following *general procedure* using **1a** (34.5  $\mu\text{L}$ , 0.2 mmol, 1.0 equiv), 4-cyanopyridine (31.3 mg, 0.3 mmol, 1.5 equiv),  $\text{B}_2\text{pin}_2$  (76.2 mg, 0.3 mmol, 1.5 equiv), **3ac** (57.4  $\mu\text{L}$ , 0.4 mmol, 2.0 equiv), DIPEA (33.1  $\mu\text{L}$ , 0.4 mmol, 0.2 equiv) and MTBE (1 mL) at 80  $^\circ\text{C}$ . After 24 h, the reaction mixture was isolated with preparative TLC on silica (PE/EA = 20:1) to afford the product **5ac** (65.6 mg, 73% yield).

**5ac:** Pale-yellow oil;  $^1\text{H}$  NMR (400 MHz,  $\text{CDCl}_3$ )  $\delta$  8.58 – 8.52 (m, 2H), 7.34 – 7.22 (m, 2H), 7.12 – 7.07 (m, 4H), 3.00 – 2.88 (m, 2H), 1.88 (s, 3H).  $^{13}\text{C}$  NMR (100 MHz,  $\text{CDCl}_3$ )  $\delta$  156.7, 149.8, 144.4, 133.1, 128.8, 128.2, 122.0, 121.2–112.3 (m, 4C, -



C<sub>4</sub>F<sub>9</sub>), 44.1, 39.7 (t,  $J_{C-F}$  = 19.6 Hz), 27.3, <sup>13</sup>C-NMR for C<sub>4</sub>F<sub>9</sub> could not be assigned. <sup>19</sup>F NMR (376 MHz, CDCl<sub>3</sub>) δ -81.0 – 81.1 (m, 3F), -109.2 – 109.4 (m, 2F), -124.4 – 124.5 (m, 2F), -125.6 – -125.7 (m, 2F). IR (film): 3029, 2985, 2930, 1595, 1494, 1411, 1352, 1232, 1133, 1013, 875, 723 cm<sup>-1</sup>. HRMS (ESI-TOF) exact mass calculated for C<sub>18</sub>H<sub>14</sub>ClF<sub>9</sub>N [M+H]<sup>+</sup> 450.0666 found 450.0666.

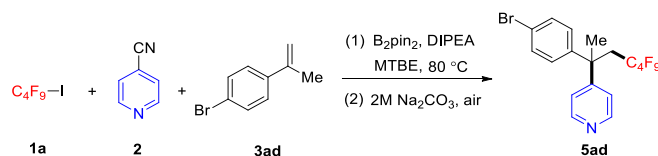

**5ad:** Prepared following *general procedure* using **1a** (34.5 μL, 0.2 mmol, 1.0 equiv), 4-cyanopyridine (31.3 mg, 0.3 mmol, 1.5 equiv), B<sub>2</sub>pin<sub>2</sub> (76.2 mg, 0.3 mmol, 1.5 equiv), **3ad** (58.4 μL, 0.4 mmol, 2.0 equiv), DIPEA (33.1 μL, 0.4 mmol, 0.2 equiv) and MTBE (1 mL) at 80 °C. After 24 h, the reaction mixture was isolated with preparative TLC on silica (PE/EA = 20:1) to afford the product **5ad** (69.0 mg, 70% yield).

**5ad:** Pale-yellow oil; <sup>1</sup>H NMR (400 MHz, CDCl<sub>3</sub>) δ 8.57 – 8.50 (m, 2H), 7.47 – 7.39 (m, 2H), 7.11 – 7.08 (m, 2H), 7.05 – 7.02 (m, 2H), 3.00 – 2.87 (m, 2H), 1.87 (s, 3H). <sup>13</sup>C NMR (100 MHz, CDCl<sub>3</sub>) δ 156.4, 150.0, 145.0, 131.8, 128.6, 121.9, 121.2, 121.3-108.3 (m, 4C, -C<sub>4</sub>F<sub>9</sub>), 44.1, 39.6 (t,  $J_{C-F}$  = 19.5 Hz), 27.2, <sup>13</sup>C-NMR for C<sub>4</sub>F<sub>9</sub> could not be assigned. <sup>19</sup>F NMR (376 MHz, CDCl<sub>3</sub>) -80.2 – -82.2 (m, 3F), -108.3 – -110.2 (m, 2F), -123.7 – -124.8 (m, 2F), -125.2 – -126.7 (m, 2F). IR (film): 3027, 2985, 1596, 1491, 1411, 1352, 1221, 1133, 1074, 1008, 875, 738, 585 cm<sup>-1</sup>. HRMS (ESI-TOF) exact mass calculated for C<sub>18</sub>H<sub>14</sub>F<sub>9</sub>NBr [M+H]<sup>+</sup> 494.0160 found 494.0162.

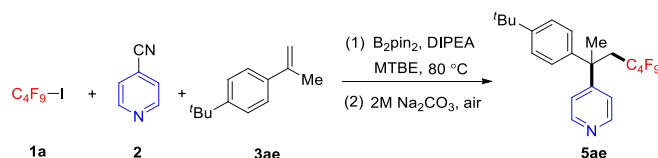

**5ae:** Prepared following *general procedure* using **1a** (34.5 μL, 0.2 mmol, 1.0 equiv), 4-cyanopyridine (31.3 mg, 0.3 mmol, 1.5 equiv), B<sub>2</sub>pin<sub>2</sub> (76.2 mg, 0.3 mmol, 1.5 equiv), **3ae** (80.8 μL, 0.4 mmol, 2.0 equiv), DIPEA (33.1 μL, 0.4 mmol, 0.2 equiv) and MTBE (1 mL) at 80 °C. After 24 h, the reaction mixture was isolated with

preparative TLC on silica (PE/EA = 20:1) to afford the product **5ae** (67.9 mg, 72% yield).

**5ae**: Pale-yellow oil;  $^1\text{H}$  NMR (400 MHz,  $\text{CDCl}_3$ )  $\delta$  8.53 (d,  $J = 5.8$  Hz, 2H), 7.33 – 7.29 (m, 2H), 7.17 – 7.14 (m, 2H), 7.06 – 7.03 (m, 2H), 3.06 – 2.88 (m, 2H), 1.90 (s, 3H), 1.29 (s, 9H).  $^{13}\text{C}$  NMR (100 MHz,  $\text{CDCl}_3$ )  $\delta$  156.6, 149.9, 149.8, 143.4, 126.1, 125.5, 122.2, 121.8–108.2 (m, 4C,  $-\text{C}_4\text{F}_9$ ), 43.9, 39.9 (t,  $J_{\text{C-F}} = 19.6$  Hz), 34.4, 31.3, 27.0,  $^{13}\text{C}$ -NMR for  $\text{C}_4\text{F}_9$  could not be assigned.  $^{19}\text{F}$  NMR (376 MHz,  $\text{CDCl}_3$ )  $\delta$  -80.9 – -81.2 (m, 3F), -108.1 – -110.3 (m, 2F), -124.5 – -124.6 (m, 2F), -125.6 – -125.8 (m, 2F). IR (film): 3030, 2965, 2907, 1594, 1513, 1463, 1352, 1236, 1163, 1048, 1016, 875, 736  $\text{cm}^{-1}$ . HRMS (ESI-TOF) exact mass calculated for  $\text{C}_{22}\text{H}_{23}\text{F}_9\text{N}$   $[\text{M}+\text{H}]^+$  472.1681 found 472.1681.

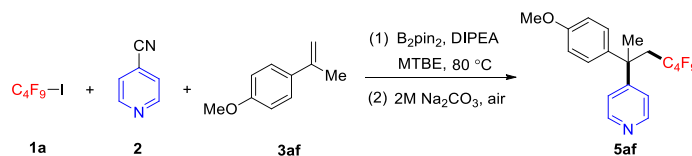

**5af**: Prepared following *general procedure* using **1a** (34.5  $\mu\text{L}$ , 0.2 mmol, 1.0 equiv), 4-cyanopyridine (31.3 mg, 0.3 mmol, 1.5 equiv),  $\text{B}_2\text{pin}_2$  (76.2 mg, 0.3 mmol, 1.5 equiv), **3af** (59.3 mg, 0.4 mmol, 2.0 equiv), DIPEA (33.1  $\mu\text{L}$ , 0.4 mmol, 0.2 equiv) and MTBE (1 mL) at  $80^\circ\text{C}$ . After 24 h, the reaction mixture was isolated with preparative TLC on silica (PE/EA = 20:1) to afford the product **5af** (59.7 mg, 67% yield).

**5af**: Pale-yellow oil;  $^1\text{H}$  NMR (400 MHz,  $\text{CDCl}_3$ )  $\delta$  8.54 – 8.50 (m, 2H), 7.14 – 7.10 (m, 2H), 7.08 – 7.04 (m, 2H), 6.86 – 6.80 (m, 2H), 3.78 (s, 3H), 3.01 – 2.87 (m, 2H), 1.88 (s, 3H).  $^{13}\text{C}$  NMR (100 MHz,  $\text{CDCl}_3$ )  $\delta$  158.2, 157.1, 149.7, 138.0, 127.6, 121.9, 113.8, 121.7–109.6 (m, 4C,  $-\text{C}_4\text{F}_9$ ), 55.3, 43.7, 39.9 (t,  $J_{\text{C-F}} = 19.5$  Hz), 27.3,  $^{13}\text{C}$ -NMR for  $\text{C}_4\text{F}_9$  could not be assigned.  $^{19}\text{F}$  NMR (376 MHz,  $\text{CDCl}_3$ )  $\delta$  -80.1 – -81.9 (m, 3F), -108.2 – -110.6 (m, 2F), -124.2 – -124.9 (m, 2F), -125.4 – -126.8 (m, 2F). IR (film): 2998, 2955, 2839, 1595, 1514, 1466, 1411, 1352, 1294, 1232, 1132, 1035, 848  $\text{cm}^{-1}$ . HRMS (ESI-TOF) exact mass calculated for  $\text{C}_{19}\text{H}_{17}\text{F}_9\text{NO}$   $[\text{M}+\text{H}]^+$  446.1161 found 446.1164.

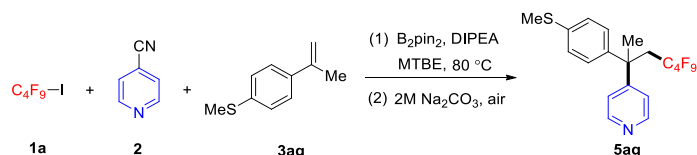

**5ag:** Prepared following *general procedure* using **1a** (34.5  $\mu$ L, 0.2 mmol, 1.0 equiv), 4-cyanopyridine (31.3 mg, 0.3 mmol, 1.5 equiv), B<sub>2</sub>pin<sub>2</sub> (76.2 mg, 0.3 mmol, 1.5 equiv), **3ag** (65.7 mg, 0.4 mmol, 2.0 equiv), DIPEA (33.1  $\mu$ L, 0.4 mmol, 0.2 equiv) and MTBE (1 mL) at 80 °C. After 24 h, the reaction mixture was isolated with preparative TLC on silica (PE/EA = 20:1) to afford the product **5ag** (66.4 mg, 72% yield).

**5ag:** Pale-yellow oil; <sup>1</sup>H NMR (400 MHz, CDCl<sub>3</sub>)  $\delta$  8.54 – 8.50 (m, 2H), 7.20 – 7.15 (m, 2H), 7.12 – 7.09 (m, 2H), 7.08 – 7.04 (m, 2H), 3.00 – 2.87 (m, 2H), 2.45 (s, 3H), 1.87 (s, 3H). <sup>13</sup>C NMR (100 MHz, CDCl<sub>3</sub>)  $\delta$  156.7, 149.9, 142.8, 137.4, 127.2, 126.4, 122.0, 121.8-109.8 (m, 4C, -C<sub>4</sub>F<sub>9</sub>), 43.9, 39.7 (t,  $J_{C-F}$  = 19.5 Hz), 27.1, 15.6, <sup>13</sup>C-NMR for C<sub>4</sub>F<sub>9</sub> could not be assigned. <sup>19</sup>F NMR (376 MHz, CDCl<sub>3</sub>)  $\delta$  -80.6 – -81.5 (m, 3F), -108.4 – -109.9 (m, 2F), -124.2 – -124.7 (m, 2F), -125.5 – -126.0 (m, 2F). IR (film): 3080, 3025, 2986, 2924, 1594, 1495, 1439, 1352, 1232, 1132, 1073, 1015, 875, 737 cm<sup>-1</sup>. HRMS (ESI-TOF) exact mass calculated for C<sub>19</sub>H<sub>17</sub>F<sub>9</sub>NS [M+H]<sup>+</sup> 462.0933 found 462.0932.

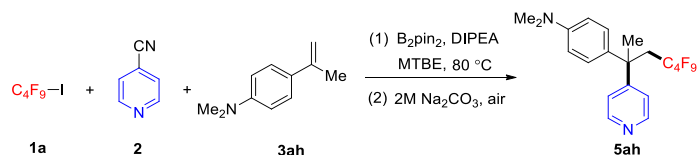

**5ah:** Prepared following *general procedure* using **1a** (34.5  $\mu$ L, 0.2 mmol, 1.0 equiv), 4-cyanopyridine (31.3 mg, 0.3 mmol, 1.5 equiv), B<sub>2</sub>pin<sub>2</sub> (76.2 mg, 0.3 mmol, 1.5 equiv), **3ah** (64.5 mg, 0.4 mmol, 2.0 equiv), DIPEA (33.1  $\mu$ L, 0.4 mmol, 0.2 equiv) and MTBE (1 mL) at 80 °C. After 24 h, the reaction mixture was isolated with preparative TLC on silica (PE/EA = 20:1) to afford the product **5ah** (57.7 mg, 63% yield).

**5ah:** Pale-yellow oil; <sup>1</sup>H NMR (400 MHz, CDCl<sub>3</sub>)  $\delta$  8.57 – 8.48 (m, 2H), 7.18 – 7.14 (m, 2H), 7.01 – 6.97 (m, 2H), 6.67 – 6.63 (m, 2H), 3.03 – 2.83 (m, 8H), 1.87 (s, 3H). <sup>13</sup>C NMR (100 MHz, CDCl<sub>3</sub>)  $\delta$  157.5, 149.6, 149.1, 133.8, 127.3, 122.2, 121.3-

112.7 (m, 4C, -C<sub>4</sub>F<sub>9</sub>), 112.2, 43.4, 40.4, 39.8 (t,  $J_{C-F} = 19.7$  Hz), 27.1, <sup>13</sup>C-NMR for C<sub>4</sub>F<sub>9</sub> could not be assigned. <sup>19</sup>F NMR (376 MHz, CDCl<sub>3</sub>) δ -80.9 – -81.2 (m, 3F), -108.8 – -109.9 (m, 2F), -124.4 – -124.6 (m, 2F), -125.5 – -125.9 (m, 2F). IR (film): 2984, 2947, 2889, 1614, 1520, 1445, 1352, 1232, 1167, 1132, 874 cm<sup>-1</sup>. HRMS (ESI-TOF) exact mass calculated for C<sub>20</sub>H<sub>20</sub>F<sub>9</sub>N<sub>2</sub> [M+H]<sup>+</sup> 459.1477 found 459.1477.

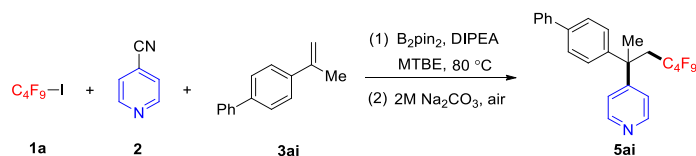

**5ai:** Prepared following *general procedure* using **1a** (34.5 μL, 0.2 mmol, 1.0 equiv), 4-cyanopyridine (31.3 mg, 0.3 mmol, 1.5 equiv), B<sub>2</sub>pin<sub>2</sub> (76.2 mg, 0.3 mmol, 1.5 equiv), **3ai** (77.1 mg, 0.4 mmol, 2.0 equiv), DIPEA (33.1 μL, 0.4 mmol, 0.2 equiv) and MTBE (1 mL) at 80 °C. After 24 h, the reaction mixture was isolated with preparative TLC on silica (PE/EA = 20:1) to afford the product **5ai** (72.7 mg, 74% yield).

**5ai:** Pale-yellow oil; <sup>1</sup>H NMR (400 MHz, CDCl<sub>3</sub>) δ 8.61 – 8.53 (m, 2H), 7.60 – 7.53 (m, 4H), 7.46 – 7.41 (m, 2H), 7.36 (d,  $J = 7.3$  Hz, 1H), 7.24 – 7.17 (m, 4H), 3.09 – 2.96 (m, 2H), 1.96 (s, 3H). <sup>13</sup>C NMR (100 MHz, CDCl<sub>3</sub>) δ 156.7, 149.9, 145.2, 140.2, 139.8, 128.9, 127.6, 127.3, 127.1, 127.1, 122.1, 121.3-108.3 (m, 4C, -C<sub>4</sub>F<sub>9</sub>), 44.1, 39.8 (t,  $J_{C-F} = 19.6$  Hz), 27.1, <sup>13</sup>C-NMR for C<sub>4</sub>F<sub>9</sub> could not be assigned. <sup>19</sup>F NMR (376 MHz, CDCl<sub>3</sub>) δ -80.6 – -81.5 (m, 3F), -107.4 – -111.2 (m, 2F), -124.0 – -124.7 (m, 2F), -125.2 – -126.2 (m, 2F). IR (film): 3030, 2987, 1594, 1488, 1411, 1352, 1232, 1133, 1072, 1016, 875 cm<sup>-1</sup>. HRMS (ESI-TOF) exact mass calculated for C<sub>24</sub>H<sub>19</sub>F<sub>9</sub>N [M+H]<sup>+</sup> 492.1368 found 492.1367.

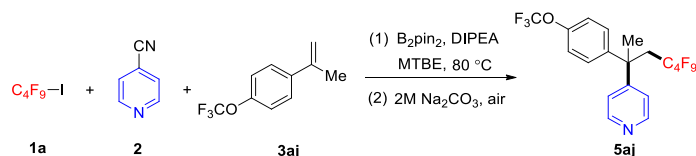

**5aj:** Prepared following *general procedure* using **1a** (34.5 μL, 0.2 mmol, 1.0 equiv), 4-cyanopyridine (31.3 mg, 0.3 mmol, 1.5 equiv), B<sub>2</sub>pin<sub>2</sub> (76.2 mg, 0.3 mmol, 1.5 equiv), **3aj** (80.9 mg, 0.4 mmol, 2.0 equiv), DIPEA (33.1 μL, 0.4 mmol, 0.2 equiv) and MTBE (1 mL) at 80 °C. After 24 h, the reaction mixture was isolated with

preparative TLC on silica (PE/EA = 20:1) to afford the product **5aj** (44.9 mg, 45% yield).

**5aj**: Pale-yellow oil;  $^1\text{H}$  NMR (400 MHz,  $\text{CDCl}_3$ )  $\delta$  8.56 (d,  $J = 5.2$  Hz, 2H), 7.21 – 7.15 (m, 4H), 7.12 – 7.09 (m, 2H), 3.02 – 2.89 (m, 2H), 1.90 (s, 3H).  $^{13}\text{C}$  NMR (100 MHz,  $\text{CDCl}_3$ )  $\delta$  156.2, 150.1, 148.1, 144.6, 128.3, 121.9, 120.9, 119.2-108.5 (m, 5C, - $\text{C}_4\text{F}_9$  and  $-\text{OCF}_3$ ), 44.1, 39.8 (t,  $J_{\text{C-F}} = 19.6$  Hz), 27.4,  $^{13}\text{C}$ -NMR for  $\text{C}_4\text{F}_9$  and  $\text{OCF}_3$  could not be assigned.  $^{19}\text{F}$  NMR (376 MHz,  $\text{CDCl}_3$ )  $\delta$  -57.9 (s, 3F), -80.7 – -81.5 (m, 3F), -107.7 – -110.6 (m, 2F), -124.3 – -124.6 (m, 2F), -125.2 – -126.7 (m, 2F). IR (film): 3029, 2987, 2930, 1595, 1510, 1471, 1353, 1217, 1133, 1072, 1018, 876  $\text{cm}^{-1}$ . HRMS (ESI-TOF) exact mass calculated for  $\text{C}_{19}\text{H}_{14}\text{F}_{12}\text{NO}$   $[\text{M}+\text{H}]^+$  500.0878 found 500.0881.

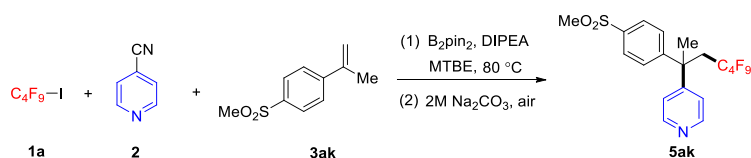

**5ak**: Prepared following *general procedure* using **1a** (34.5  $\mu\text{L}$ , 0.2 mmol, 1.0 equiv), 4-cyanopyridine (31.3 mg, 0.3 mmol, 1.5 equiv),  $\text{B}_2\text{pin}_2$  (76.2 mg, 0.3 mmol, 1.5 equiv), **3ak** (78.4 mg, 0.4 mmol, 2.0 equiv), DIPEA (33.1  $\mu\text{L}$ , 0.4 mmol, 0.2 equiv) and MTBE (1 mL) at 80  $^\circ\text{C}$ . After 24 h, the reaction mixture was isolated with preparative TLC on silica (PE/EA = 20:1) to afford the product **5ak** (59.2 mg, 60% yield).

**5ak**: Pale-yellow oil;  $^1\text{H}$  NMR (400 MHz,  $\text{CDCl}_3$ )  $\delta$  8.56 (d,  $J = 5.1$  Hz, 2H), 7.91 – 7.87 (m, 2H), 7.40 – 7.37 (m, 2H), 7.09 – 7.06 (m, 2H), 3.06 – 2.95 (m, 5H), 1.94 (s, 3H).  $^{13}\text{C}$  NMR (100 MHz,  $\text{CDCl}_3$ )  $\delta$  155.5, 152.0, 150.1, 139.3, 127.8, 127.6, 121.7, 121.2-108.8 (m, 4C,  $-\text{C}_4\text{F}_9$ ), 44.5, 44.4, 39.5 (t,  $J_{\text{C-F}} = 19.7$  Hz), 27.1,  $^{13}\text{C}$ -NMR for  $\text{C}_4\text{F}_9$  could not be assigned.  $^{19}\text{F}$  NMR (376 MHz,  $\text{CDCl}_3$ )  $\delta$  -80.8 – -81.2 (m, 3F), -108.9 – -109.2 (m, 2F), -124.3 – -124.5 (m, 2F), -125.5 – -125.9 (m, 2F). IR (film): 2992, 2954, 1727, 1611, 1594, 1437, 1411, 1352, 1283, 1232, 1132, 1018, 736  $\text{cm}^{-1}$ . HRMS (ESI-TOF) exact mass calculated for  $\text{C}_{19}\text{H}_{17}\text{F}_9\text{NO}_2\text{S}$   $[\text{M}+\text{H}]^+$  494.0831 found 494.0831.

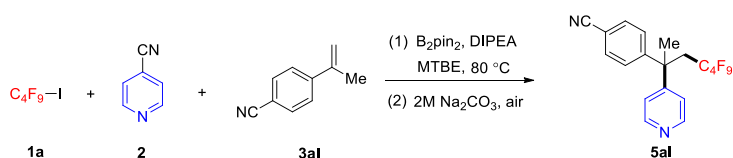

**5al**: Prepared following *general procedure* using **1a** (34.5  $\mu$ L, 0.2 mmol, 1.0 equiv), 4-cyanopyridine (31.3 mg, 0.3 mmol, 1.5 equiv), B<sub>2</sub>pin<sub>2</sub> (76.2 mg, 0.3 mmol, 1.5 equiv), **3al** (57.3 mg, 0.4 mmol, 2.0 equiv), DIPEA (33.1  $\mu$ L, 0.4 mmol, 0.2 equiv) and MTBE (1 mL) at 80 °C. After 24 h, the reaction mixture was isolated with preparative TLC on silica (PE/EA = 20:1) to afford the product **5al** (37.8 mg, 43% yield).

**5al**: Pale-yellow oil; <sup>1</sup>H NMR (400 MHz, CDCl<sub>3</sub>)  $\delta$  8.56 (d, *J* = 5.2 Hz, 2H), 7.64 – 7.60 (m, 2H), 7.31 – 7.29 (m, 2H), 7.08 – 7.06 (m, 2H), 3.03 – 2.93 (m, 2H), 1.91 (s, 3H). <sup>13</sup>C NMR (100 MHz, CDCl<sub>3</sub>)  $\delta$  155.6, 150.9, 150.1, 132.3, 127.6, 121.7, 118.2, 111.2, 121.1-108.8 (m, 4C, -C<sub>4</sub>F<sub>9</sub>), 44.7, 39.5 (t, *J*<sub>C-F</sub> = 19.7 Hz), 27.1, <sup>13</sup>C-NMR for C<sub>4</sub>F<sub>9</sub> could not be assigned. <sup>19</sup>F NMR (376 MHz, CDCl<sub>3</sub>)  $\delta$  -80.3 – -81.8 (m, 3F), -108.9 – -109.3 (m, 2F), -124.1 – -124.7 (m, 2F), -125.4 – -126.0 (m, 2F). IR (film): 2987, 2229, 1594, 1506, 1411, 1353, 1232, 1133, 1071, 1018, 876 cm<sup>-1</sup>. HRMS (ESI-TOF) exact mass calculated for C<sub>19</sub>H<sub>14</sub>F<sub>9</sub>N<sub>2</sub> [M+H]<sup>+</sup> 441.1008 found 441.1010.

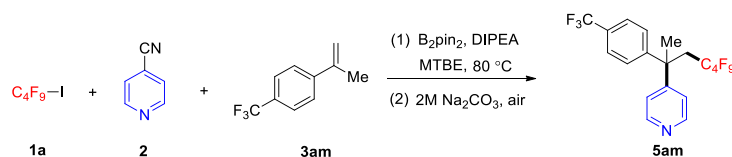

**5am**: Prepared following *general procedure* using **1a** (34.5  $\mu$ L, 0.2 mmol, 1.0 equiv), 4-cyanopyridine (31.3 mg, 0.3 mmol, 1.5 equiv), B<sub>2</sub>pin<sub>2</sub> (76.2 mg, 0.3 mmol, 1.5 equiv), **3am** (57.3 mg, 0.4 mmol, 2.0 equiv), DIPEA (33.1  $\mu$ L, 0.4 mmol, 0.2 equiv) and MTBE (1 mL) at 80 °C. After 24 h, the reaction mixture was isolated with preparative TLC on silica (PE/EA = 20:1) to afford the product **5am** (71.5 mg, 74% yield).

**5am**: Pale-yellow oil; <sup>1</sup>H NMR (400 MHz, CDCl<sub>3</sub>)  $\delta$  8.60 – 8.54 (m, 2H), 7.61 – 7.53 (m, 2H), 7.29 (d, *J* = 8.3 Hz, 2H), 7.11 – 7.07 (m, 2H), 3.04 – 2.93 (m, 2H), 1.92 (s, 3H). <sup>13</sup>C NMR (100 MHz, CDCl<sub>3</sub>)  $\delta$  156.0, 150.2, 149.9, 129.5 (q, *J*<sub>C-F</sub> = 33.1, 32.7 Hz, -CF<sub>3</sub>), 127.3, 125.6, 125.6, 121.9, 121.4-108.9 (m, 4C, -C<sub>4</sub>F<sub>9</sub>), 44.4, 39.73 (t, *J*<sub>C-F</sub> = 19.6 Hz), 27.2, <sup>13</sup>C-NMR for C<sub>4</sub>F<sub>9</sub> could not be assigned. <sup>19</sup>F NMR (376 MHz, CDCl<sub>3</sub>)  $\delta$  -62.7 (3F), -81.0 – -81.2 (m, 3F), -109.1 – -109.3 (m, 2F), -124.5 – -124.5 (m, 2F), -125.6 – -125.8 (m, 2F). IR (film): 3026, 2987, 2951, 1620, 1595, 1555, 1412, 1352,

1328, 1224, 1132, 1073, 1016, 853  $\text{cm}^{-1}$ . HRMS (ESI-TOF) exact mass calculated for  $\text{C}_{19}\text{H}_{14}\text{F}_{12}\text{N}$  484.0929  $[\text{M}+\text{H}]^+$  found 484.0932.

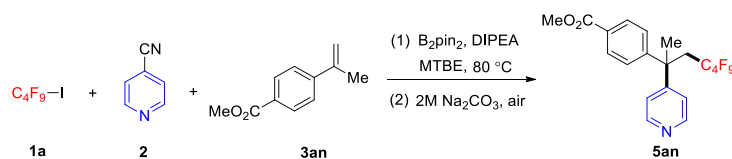

**5an:** Prepared following *general procedure* using **1a** (34.5  $\mu\text{L}$ , 0.2 mmol, 1.0 equiv), 4-cyanopyridine (31.3 mg, 0.3 mmol, 1.5 equiv),  $\text{B}_2\text{pin}_2$  (76.2 mg, 0.3 mmol, 1.5 equiv), **3an** (70.4 mg, 0.4 mmol, 2.0 equiv), DIPEA (33.1  $\mu\text{L}$ , 0.4 mmol, 0.2 equiv) and MTBE (1 mL) at 80  $^\circ\text{C}$ . After 24 h, the reaction mixture was isolated with preparative TLC on silica (PE/EA = 20:1) to afford the product **5an** (60.5 mg, 64% yield).

**5an:** Pale-yellow oil;  $^1\text{H}$  NMR (400 MHz,  $\text{CDCl}_3$ )  $\delta$  8.58 – 8.51 (m, 2H), 8.01 – 7.94 (m, 2H), 7.26 – 7.23 (m, 2H), 7.10 – 7.07 (m, 2H), 3.88 (s, 3H), 3.04 – 2.93 (m, 2H), 1.91 (s, 3H).  $^{13}\text{C}$  NMR (100 MHz,  $\text{CDCl}_3$ )  $\delta$  166.6, 156.2, 150.9, 150.0, 129.9, 129.0, 126.9, 121.9, 121.0-108.6 (m, 4C,  $-\text{C}_4\text{F}_9$ ), 52.2, 44.5, 39.6 (t,  $J_{\text{C-F}} = 19.6$  Hz), 27.1,  $^{13}\text{C}$ -NMR for  $\text{C}_4\text{F}_9$  could not be assigned.  $^{19}\text{F}$  NMR (376 MHz,  $\text{CDCl}_3$ )  $\delta$  -80.29 – -81.93 (m, 3F), -108.7 – -109.7 (m, 2F), -124.0 – -124.8 (m, 2F), -125.3 – -126.1 (m, 2F); IR (film): 2992, 2954, 1940, 1747, 1611, 1437, 1411, 1352, 1283, 1232, 1048, 1017, 877  $\text{cm}^{-1}$ . HRMS (ESI-TOF) exact mass calculated for  $\text{C}_{20}\text{H}_{17}\text{F}_9\text{NO}_2$   $[\text{M}+\text{H}]^+$  474.1110 found 474.1111.

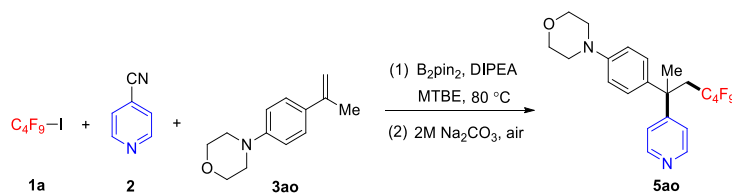

**5ao:** Prepared following *general procedure* using **1a** (34.5  $\mu\text{L}$ , 0.2 mmol, 1.0 equiv), 4-cyanopyridine (31.3 mg, 0.3 mmol, 1.5 equiv),  $\text{B}_2\text{pin}_2$  (76.2 mg, 0.3 mmol, 1.5 equiv), **3ao** (81.3 mg, 0.4 mmol, 2.0 equiv), DIPEA (33.1  $\mu\text{L}$ , 0.4 mmol, 0.2 equiv) and MTBE (1 mL) at 80  $^\circ\text{C}$ . After 24 h, the reaction mixture was isolated with preparative TLC on silica (PE/EA = 20:1) to afford the product **5ao** (55.0 mg, 55% yield).

**5ao:** Pale-yellow oil;  $^1\text{H}$  NMR (400 MHz,  $\text{CDCl}_3$ )  $\delta$  8.52 (d,  $J = 5.2$  Hz, 2H), 7.15 – 7.12 (m, 2H), 7.05 – 7.02 (m, 2H), 6.84 – 6.81 (m, 2H), 3.85 – 3.82 (m, 4H), 3.16 – 3.13 (m, 4H), 3.00 – 2.87 (m, 2H), 1.87 (s, 3H).  $^{13}\text{C}$  NMR (100 MHz,  $\text{CDCl}_3$ )  $\delta$  157.2, 149.8, 149.7, 137.2, 127.4, 122.1, 115.2, 121.4-108.3 (m, 4C,  $-\text{C}_4\text{F}_9$ ), 66.9, 48.9, 43.6, 39.8 (t,  $J_{\text{C-F}} = 19.5$  Hz), 27.1,  $^{13}\text{C}$ -NMR for  $\text{C}_4\text{F}_9$  could not be assigned.  $^{19}\text{F}$  NMR (376 MHz,  $\text{CDCl}_3$ )  $\delta$  -81.0 – -81.1 (m, 3F), -109.2 – -110.2 (m, 2F), -124.4 – -124.6 (m, 2F), -125.6 – -125.7 (m, 2F). IR (film): 2963, 2856, 1612, 1594, 1517, 1451, 1351, 1410, 1351, 1303, 1232, 1132, 1070, 1017, 932, 732  $\text{cm}^{-1}$ . HRMS (ESI-TOF) exact mass calculated for  $\text{C}_{22}\text{H}_{22}\text{F}_9\text{NO}_2$   $[\text{M}+\text{H}]^+$  501.1583 found 501.1583.

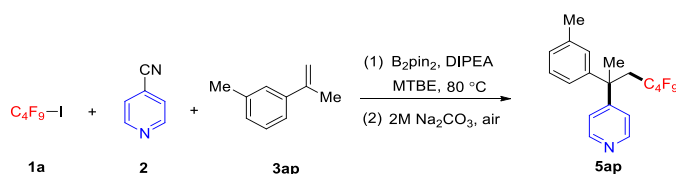

**5ap:** Prepared following *general procedure* using **1a** (34.5  $\mu\text{L}$ , 0.2 mmol, 1.0 equiv), 4-cyanopyridine (31.3 mg, 0.3 mmol, 1.5 equiv),  $\text{B}_2\text{pin}_2$  (76.2 mg, 0.3 mmol, 1.5 equiv), **3ap** (52.9 mg, 0.4 mmol, 2.0 equiv), DIPEA (33.1  $\mu\text{L}$ , 0.4 mmol, 0.2 equiv) and MTBE (1 mL) at  $80^\circ\text{C}$ . After 24 h, the reaction mixture was isolated with preparative TLC on silica (PE/EA = 20:1) to afford the product **5ap** (44.6 mg, 52% yield).

**5ap:** Pale-yellow oil;  $^1\text{H}$  NMR (400 MHz,  $\text{CDCl}_3$ )  $\delta$  8.57 – 8.51 (m, 2H), 7.23 – 7.17 (m, 1H), 7.16 – 7.11 (m, 2H), 7.05 (d,  $J = 7.5$  Hz, 1H), 6.96 – 6.92 (m, 2H), 3.05 – 2.90 (m, 2H), 2.31 (s, 3H), 1.90 (s, 3H).  $^{13}\text{C}$  NMR (100 MHz,  $\text{CDCl}_3$ )  $\delta$  156.8, 149.9, 146.3, 138.3, 128.5, 127.8, 127.3, 123.7, 122.1, 121.6-109.9 (m, 4C,  $-\text{C}_4\text{F}_9$ ), 44.1, 39.8 (t,  $J_{\text{C-F}} = 19.5$  Hz), 27.0, 21.7,  $^{13}\text{C}$ -NMR for  $\text{C}_4\text{F}_9$  could not be assigned.  $^{19}\text{F}$  NMR (376 MHz,  $\text{CDCl}_3$ )  $\delta$  -80.7 – -81.6 (m, 3F), -108.3 – -110.1 (m, 2F), -124.2 – -124.8 (m, 2F), -125.5 – -126.3 (m, 2F). IR (film): 3026, 2885, 2927, 1594, 1553, 1492, 1352, 1236, 1133, 1017, 880  $\text{cm}^{-1}$ . HRMS (ESI-TOF) exact mass calculated for  $\text{C}_{19}\text{H}_{17}\text{F}_9\text{N}$   $[\text{M}+\text{H}]^+$  430.1212 found 430.1216.



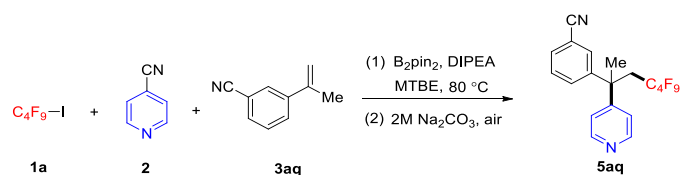

**5aq:** Prepared following *general procedure* using **1a** (34.5  $\mu$ L, 0.2 mmol, 1.0 equiv), 4-cyanopyridine (31.3 mg, 0.3 mmol, 1.5 equiv), B<sub>2</sub>pin<sub>2</sub> (76.2 mg, 0.3 mmol, 1.5 equiv), **3aq** (57.2 mg, 0.4 mmol, 2.0 equiv), DIPEA (33.1  $\mu$ L, 0.4 mmol, 0.2 equiv) and MTBE (1 mL) at 80 °C. After 24 h, the reaction mixture was isolated with preparative TLC on silica (PE/EA = 20:1) to afford the product **5aq** (54.6 mg, 62% yield).

**5aq:** Pale-yellow oil; <sup>1</sup>H NMR (400 MHz, CDCl<sub>3</sub>)  $\delta$  8.66 – 8.55 (m, 2H), 7.57 (d,  $J$  = 7.3 Hz, 1H), 7.50 (s, 1H), 7.46 – 7.39 (m, 2H), 7.13 – 7.08 (m, 2H), 3.03 – 2.91 (m, 2H), 1.92 (s, 3H). <sup>13</sup>C NMR (100 MHz, CDCl<sub>3</sub>)  $\delta$  156.1, 149.9, 147.3, 131.5, 131.0, 130.4, 129.6, 122.0, 118.5, 113.0, 120.9-108.7 (m, 4C, -C<sub>4</sub>F<sub>9</sub>), 44.4, 39.6 (t,  $J_{C-F}$  = 19.6 Hz), 27.2, <sup>13</sup>C-NMR for C<sub>4</sub>F<sub>9</sub> could not be assigned. <sup>19</sup>F NMR (376 MHz, CDCl<sub>3</sub>)  $\delta$  -80.9 – -81.1 (m, 3F), -109.1 – -109.2 (m, 2F), -124.3 – -124.5 (m, 2F), -125.6 – -125.8 (m, 2F). IR (film): 2986, 2929, 2856, 2231, 1595, 1485, 1421, 1393, 1224, 1133, 1018, 877 cm<sup>-1</sup>. HRMS (ESI-TOF) exact mass calculated for C<sub>19</sub>H<sub>14</sub>F<sub>9</sub>N<sub>2</sub> [M+H]<sup>+</sup> 441.1008 found 441.1007.

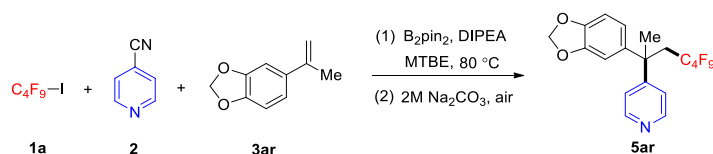

**5ar:** Prepared following *general procedure* using **1a** (34.5  $\mu$ L, 0.2 mmol, 1.0 equiv), 4-cyanopyridine (31.3 mg, 0.3 mmol, 1.5 equiv), B<sub>2</sub>pin<sub>2</sub> (76.2 mg, 0.3 mmol, 1.5 equiv), **3ar** (64.8 mg, 0.4 mmol, 2.0 equiv), DIPEA (33.1  $\mu$ L, 0.4 mmol, 0.2 equiv) and MTBE (1 mL) at 80 °C. After 24 h, the reaction mixture was isolated with preparative TLC on silica (PE/EA = 20:1) to afford the product **5ar** (66.1 mg, 72% yield).

**5ar:** Pale-yellow oil; <sup>1</sup>H NMR (400 MHz, CDCl<sub>3</sub>)  $\delta$  8.55 – 8.50 (m, 2H), 7.13 – 7.10 (m, 2H), 6.73 (d,  $J$  = 8.2 Hz, 1H), 6.64 (dd,  $J$  = 8.2, 2.0 Hz, 1H), 6.57 (d,  $J$  = 2.0 Hz, 1H), 5.92 (s, 2H), 2.99 – 2.83 (m, 2H), 1.85 (s, 3H). <sup>13</sup>C NMR (100 MHz, CDCl<sub>3</sub>)

$\delta$  156.9, 149.9, 148.0, 146.5, 140.1, 121.9, 119.7, 108.0, 107.7, 121.4-108.2 (m, 4C, -C<sub>4</sub>F<sub>9</sub>), 101.3, 44.1, 39.8 (t,  $J_{C-F}$  = 19.5 Hz), 27.3, <sup>13</sup>C-NMR for C<sub>4</sub>F<sub>9</sub> could not be assigned. <sup>19</sup>F NMR (376 MHz, CDCl<sub>3</sub>)  $\delta$  -80.9 – -81.2 (m, 3F), -109.1 – -109.8 (m, 2F), -124.3 – -124.6 (m, 2F), -125.5 – -125.9 (m, 2F). IR (film): 3021, 2986, 2895, 2779, 1730, 1594, 1551, 1505, 1488, 1435, 1352, 1240, 1166, 1132, 1041, 736 cm<sup>-1</sup>. HRMS (ESI-TOF) exact mass calculated for C<sub>19</sub>H<sub>15</sub>F<sub>9</sub>NO<sub>2</sub> [M+H]<sup>+</sup> 460.0954 found 460.0954.

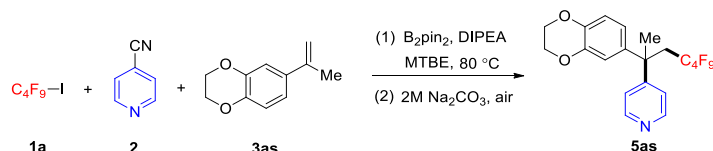

**5as:** Prepared following *general procedure* using **1a** (34.5  $\mu$ L, 0.2 mmol, 1.0 equiv), 4-cyanopyridine (31.3 mg, 0.3 mmol, 1.5 equiv), B<sub>2</sub>pin<sub>2</sub> (76.2 mg, 0.3 mmol, 1.5 equiv), **3as** (70.4 mg, 0.4 mmol, 2.0 equiv), DIPEA (33.1  $\mu$ L, 0.4 mmol, 0.2 equiv) and MTBE (1 mL) at 80 °C. After 24 h, the reaction mixture was isolated with preparative TLC on silica (PE/EA = 20:1) to afford the product **5as** (66.2 mg, 70% yield).

**5as:** Pale-yellow oil; <sup>1</sup>H NMR (400 MHz, CDCl<sub>3</sub>)  $\delta$  8.52 (d,  $J$  = 5.2 Hz, 2H), 7.14 – 7.11 (m, 2H), 6.77 (d,  $J$  = 8.5 Hz, 1H), 6.64 (d,  $J$  = 2.4 Hz, 1H), 6.58 (dd,  $J$  = 8.5, 2.5 Hz, 1H), 4.22 – 4.21 (m, 4H), 2.99 – 2.82 (m, 2H), 1.85 (d,  $J$  = 1.6 Hz, 3H). <sup>13</sup>C NMR (100 MHz, CDCl<sub>3</sub>)  $\delta$  156.8, 149.8, 143.3, 142.4, 139.6, 122.0, 119.6, 117.2, 115.8, 121.6-108.3 (m, 4C, -C<sub>4</sub>F<sub>9</sub>), 64.4, 64.4, 43.7, 39.8 (t,  $J_{C-F}$  = 19.5 Hz), 27.0, <sup>13</sup>C-NMR for C<sub>4</sub>F<sub>9</sub> could not be assigned. <sup>19</sup>F NMR (376 MHz, CDCl<sub>3</sub>)  $\delta$  -81.0 – -81.1 (m, 3F), -109.0 – -109.8 (m, 2F), -124.5 – -124.6 (m, 2F), -125.6 – -125.8 (m, 2F). IR (film): 2983, 2936, 2882, 1593, 1507, 1459, 1411, 1352, 1288, 1232, 1132, 1068, 1049, 734 cm<sup>-1</sup>. HRMS (ESI-TOF) exact mass calculated for C<sub>20</sub>H<sub>17</sub>F<sub>9</sub>NO<sub>2</sub> [M+H]<sup>+</sup> 474.1110 found 474.1110.

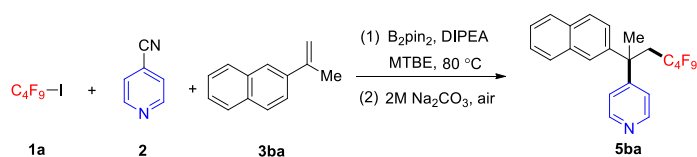

**5ba:** Prepared following *general procedure* using **1a** (34.5  $\mu$ L, 0.2 mmol, 1.0 equiv), 4-cyanopyridine (31.3 mg, 0.3 mmol, 1.5 equiv), B<sub>2</sub>pin<sub>2</sub> (76.2 mg, 0.3 mmol,

1.5 equiv), **3ba** (67.2 mg, 0.4 mmol, 2.0 equiv), DIPEA (33.1  $\mu$ L, 0.4 mmol, 0.2 equiv) and MTBE (1 mL) at 80  $^{\circ}$ C. After 24 h, the reaction mixture was isolated with preparative TLC on silica (PE/EA = 20:1) to afford the product **5ba** (67.9 mg, 73% yield).

**5ba**: Pale-yellow oil;  $^1\text{H}$  NMR (400 MHz,  $\text{CDCl}_3$ )  $\delta$  8.55 (d,  $J$  = 5.0 Hz, 2H), 7.84 – 7.73 (m, 4H), 7.54 – 7.47 (m, 2H), 7.18 – 7.15 (m, 2H), 7.11 (dd,  $J$  = 8.7, 2.1 Hz, 1H), 3.16 – 3.05 (m, 2H), 2.01 (s, 3H).  $^{13}\text{C}$  NMR (100 MHz,  $\text{CDCl}_3$ )  $\delta$  156.8, 149.9, 143.3, 133.1, 132.2, 128.5, 128.2, 127.6, 126.6, 126.5, 125.5, 124.7, 122.2, 120.7-108.4 (m, 4C,  $-\text{C}_4\text{F}_9$ ), 44.4, 39.63 (t,  $J_{\text{C-F}}$  = 19.6 Hz), 27.1,  $^{13}\text{C}$ -NMR for  $\text{C}_4\text{F}_9$  could not be assigned.  $^{19}\text{F}$  NMR (376 MHz,  $\text{CDCl}_3$ )  $\delta$  -80.1 – -82.1 (m, 3F), -105.9 – -112.3 (m, 2F), -123.6 – -124.9 (m, 2F), -125.1 – -126.8 (m, 2F). IR (film): 3058, 3024, 2985, 1594, 1551, 1494, 1457, 1410, 1351, 1220, 1133, 1017, 733  $\text{cm}^{-1}$ . HRMS (ESI-TOF) exact mass calculated for  $\text{C}_{22}\text{H}_{17}\text{F}_9\text{N}$  466.1212  $[\text{M}+\text{H}]^+$  found 466.1211.

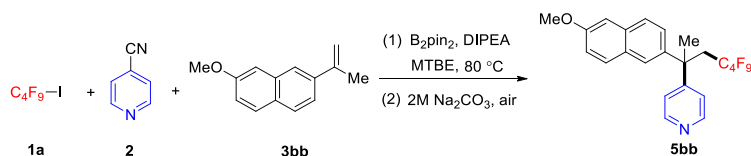

**5bb**: Prepared following *general procedure* using **1a** (34.5  $\mu$ L, 0.2 mmol, 1.0 equiv), 4-cyanopyridine (31.3 mg, 0.3 mmol, 1.5 equiv),  $\text{B}_2\text{pin}_2$  (76.2 mg, 0.3 mmol, 1.5 equiv), **3bb** (79.3 mg, 0.4 mmol, 2.0 equiv), DIPEA (33.1  $\mu$ L, 0.4 mmol, 0.2 equiv) and MTBE (1 mL) at 80  $^{\circ}$ C. After 24 h, the reaction mixture was isolated with preparative TLC on silica (PE/EA = 20:1) to afford the product **5bb** (69.3 mg, 70% yield).

**5bb**: Pale-yellow oil;  $^1\text{H}$  NMR (400 MHz,  $\text{CDCl}_3$ )  $\delta$  8.54 (d,  $J$  = 4.9 Hz, 2H), 7.71 (d,  $J$  = 9.0 Hz, 1H), 7.66 – 7.64 (m, 2H), 7.19 – 7.15 (m, 3H), 7.11 – 7.06 (m, 2H), 3.91 (s, 3H), 3.13 – 3.02 (m, 2H), 1.99 (s, 3H).  $^{13}\text{C}$  NMR (100 MHz,  $\text{CDCl}_3$ )  $\delta$  158.2, 156.9, 149.9, 141.1, 133.3, 129.7, 128.5, 127.4, 126.0, 124.5, 122.2, 119.4, 121.4-107.5 (m, 4C,  $-\text{C}_4\text{F}_9$ ), 105.6, 55.4, 44.2, 39.6 (t,  $J_{\text{C-F}}$  = 19.5 Hz), 27.1,  $^{13}\text{C}$  NMR for  $\text{C}_4\text{F}_9$  could not be assigned.  $^{19}\text{F}$  NMR (376 MHz,  $\text{CDCl}_3$ )  $\delta$  -80.2 – -81.9 (m, 3F), -107.7 – -111.0 (m, 2F), -124.0 – -124.7 (m, 2F), -125.2 – -126.7 (m, 2F). IR (film): 3060, 3000, 2940,

2844, 1633, 1606, 1552, 1504, 1440, 1351, 1221, 1165, 1032, 819  $\text{cm}^{-1}$ . HRMS (ESI-TOF) exact mass calculated for  $\text{C}_{23}\text{H}_{19}\text{F}_9\text{NO}$   $[\text{M}+\text{H}]^+$  496.1317 found 496.1316.

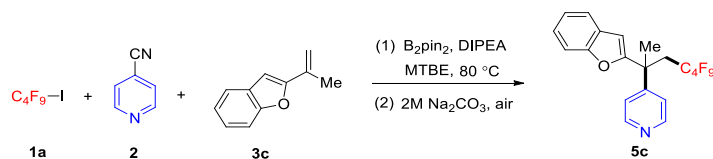

**5c:** Prepared following *general procedure* using **1a** (34.5  $\mu\text{L}$ , 0.2 mmol, 1.0 equiv), 4-cyanopyridine (31.3 mg, 0.3 mmol, 1.5 equiv),  $\text{B}_2\text{pin}_2$  (76.2 mg, 0.3 mmol, 1.5 equiv), **3c** (63.3 mg, 0.4 mmol, 2.0 equiv), DIPEA (33.1  $\mu\text{L}$ , 0.4 mmol, 0.2 equiv) and MTBE (1 mL) at 80  $^\circ\text{C}$ . After 24 h, the reaction mixture was isolated with preparative TLC on silica (PE/EA = 20:1) to afford the product **5c** (34.6 mg, 38% yield).

**5c:** Pale-yellow oil;  $^1\text{H}$  NMR (400 MHz,  $\text{CDCl}_3$ )  $\delta$  8.55 (d,  $J = 5.1$  Hz, 2H), 7.54 – 7.51 (m, 1H), 7.42 – 7.38 (m, 1H), 7.27 – 7.19 (m, 4H), 6.55 (s, 1H), 3.21 – 3.07 (m, 1H), 2.98 – 2.86 (m, 1H), 1.97 (s, 3H).  $^{13}\text{C}$  NMR (100 MHz,  $\text{CDCl}_3$ )  $\delta$  160.0, 154.8, 153.6, 150.8, 150.1, 128.0, 125.3, 124.5, 123.2, 121.3, 121.1, 111.3, 120.9-108.6 (m, 4C,  $-\text{C}_4\text{F}_9$ ), 103.6, 41.8, 38.2 (t,  $J_{\text{C-F}} = 19.8$  Hz), 24.3,  $^{13}\text{C}$ -NMR for  $\text{C}_4\text{F}_9$  could not be assigned.  $^{19}\text{F}$  NMR (376 MHz,  $\text{CDCl}_3$ )  $\delta$  -81.0 – -81.1 (m, 3F), -109.1 – -112.6 (m, 2F), -124.5 – -124.5 (m, 2F), -125.6 – -125.8 (m, 2F). IR (film): 3033, 298, 1595, 1454, 1411, 1371, 1223, 1185, 1133, 1050, 1018, 751  $\text{cm}^{-1}$ . HRMS (ESI-TOF) exact mass calculated for  $\text{C}_{20}\text{H}_{15}\text{F}_9\text{NO}$   $[\text{M}+\text{H}]^+$  456.1004 found 456.1005.

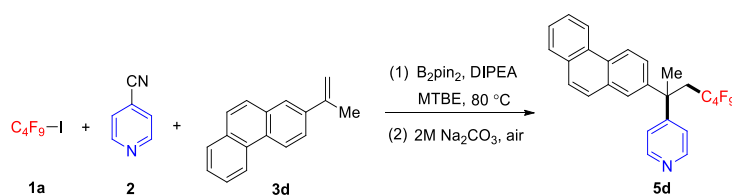

**5d:** Prepared following *general procedure* using **1a** (34.5  $\mu\text{L}$ , 0.2 mmol, 1.0 equiv), 4-cyanopyridine (31.3 mg, 0.3 mmol, 1.5 equiv),  $\text{B}_2\text{pin}_2$  (76.2 mg, 0.3 mmol, 1.5 equiv), **3d** (87.2 mg, 0.4 mmol, 2.0 equiv), DIPEA (33.1  $\mu\text{L}$ , 0.4 mmol, 0.2 equiv) and MTBE (1 mL) at 80  $^\circ\text{C}$ . After 24 h, the reaction mixture was isolated with preparative TLC on silica (PE/EA = 20:1) to afford the product **5d** (72.1 mg, 70% yield).

**5d:** Pale-yellow oil;  $^1\text{H}$  NMR (400 MHz,  $\text{CDCl}_3$ )  $\delta$  8.65 – 8.51 (m, 4H), 7.90 (dd,  $J = 7.8, 1.5$  Hz, 1H), 7.80 – 7.59 (m, 5H), 7.33 (dd,  $J = 8.7, 2.1$  Hz, 1H), 7.27 – 7.22 (m, 2H), 3.20 – 3.08 (m, 2H), 2.06 (s, 3H).  $^{13}\text{C}$  NMR (100 MHz,  $\text{CDCl}_3$ )  $\delta$  157.1,

149.8, 144.2, 132.2, 131.9, 129.9, 129.1, 128.7, 127.8, 126.9, 126.9, 126.9, 125.8, 125.8, 123.4, 122.7, 122.3, 120.2 – 110.1 (m, 4C, -C<sub>4</sub>F<sub>9</sub>), 44.4, 39.8 (t, *J*<sub>C-F</sub> = 19.6 Hz), 27.3, <sup>13</sup>C-NMR for C<sub>4</sub>F<sub>9</sub> could not be assigned. <sup>19</sup>F NMR (376 MHz, CDCl<sub>3</sub>) δ -80.6 – -81.4 (m, 3F), -108.1 – -110.4 (m, 2F), -124.0 – -124.5 (m, 2F), -125.3 – -125.9 (m, 2F). IR (film): 3028, 2928, 2855, 1594, 1411, 1352, 1232, 1132, 1017, 746 cm<sup>-1</sup>. HRMS (ESI-TOF) exact mass calculated for C<sub>26</sub>H<sub>19</sub>F<sub>9</sub>N [M+H]<sup>+</sup> 516.1368 found 516.1368.

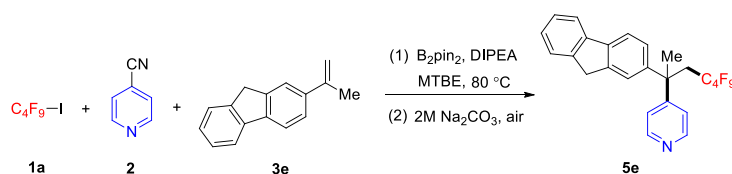

**5e**: Prepared following *general procedure* using **1a** (34.5 μL, 0.2 mmol, 1.0 equiv), 4-cyanopyridine (31.3 mg, 0.3 mmol, 1.5 equiv), B<sub>2</sub>pin<sub>2</sub> (76.2 mg, 0.3 mmol, 1.5 equiv), **3e** (82.5 mg, 0.4 mmol, 2.0 equiv), DIPEA (33.1 μL, 0.4 mmol, 0.2 equiv) and MTBE (1 mL) at 80 °C. After 24 h, the reaction mixture was isolated with preparative TLC on silica (PE/EA = 20:1) to afford the product **5e** (52.3 mg, 52% yield).

**5e**: Pale-yellow oil; <sup>1</sup>H NMR (400 MHz, CDCl<sub>3</sub>) δ 8.46 (d, *J* = 5.6 Hz, 2H), 7.64 (dd, *J* = 18.9, 7.8 Hz, 2H), 7.44 (d, *J* = 7.4 Hz, 1H), 7.29 – 7.17 (m, 3H), 7.10 – 7.06 (m, 3H), 3.77 (s, 2H), 3.02 – 2.90 (m, 2H), 1.88 (s, 3H). <sup>13</sup>C NMR (100 MHz, CDCl<sub>3</sub>) δ 157.2, 149.9, 144.8, 143.7, 143.5, 141.0, 140.7, 127.0, 126.9, 125.4, 125.1, 123.3, 122.1, 120.1, 119.9, 121.6-108.2 (m, 4C, -C<sub>4</sub>F<sub>9</sub>), 44.4, 37.1, 39.9 (t, *J*<sub>C-F</sub> = 19.5 Hz), 27.4, <sup>13</sup>C-NMR for C<sub>4</sub>F<sub>9</sub> could not be assigned. <sup>19</sup>F NMR (376 MHz, CDCl<sub>3</sub>) δ -80.9 – -81.1 (m, 3F), -109.0 – -109.3 (m, 2F), -124.3 – -124.5 (m, 2F), -125.6 – -125.7 (m, 2F); IR (film): 3021, 2987, 2926, 2855, 1687, 1594, 1552, 1466, 1410, 1352, 1224, 1132, 1017, 880, 735 cm<sup>-1</sup>. HRMS (ESI-TOF) exact mass calculated for C<sub>25</sub>H<sub>19</sub>F<sub>9</sub>N [M+H]<sup>+</sup> 504.1368 found 504.1368.

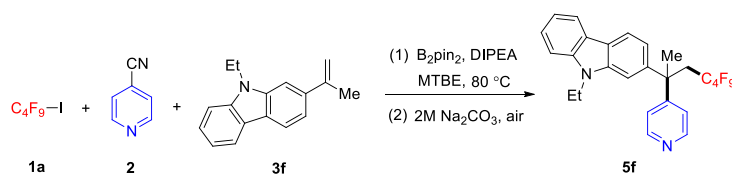

**5f**: Prepared following *general procedure* using **1a** (34.5  $\mu$ L, 0.2 mmol, 1.0 equiv), 4-cyanopyridine (31.3 mg, 0.3 mmol, 1.5 equiv), B<sub>2</sub>pin<sub>2</sub> (76.2 mg, 0.3 mmol, 1.5 equiv), **3f** (94.1 mg, 0.4 mmol, 2.0 equiv), DIPEA (33.1  $\mu$ L, 0.4 mmol, 0.2 equiv) and MTBE (1 mL) at 80 °C. After 24 h, the reaction mixture was isolated with preparative TLC on silica (PE/EA = 20:1) to afford the product **5f** (53.2 mg, 50% yield).

**5f**: Pale-yellow oil; <sup>1</sup>H NMR (400 MHz, CDCl<sub>3</sub>)  $\delta$  8.58 – 8.50 (m, 2H), 8.07 (d,  $J$  = 7.8 Hz, 1H), 7.96 (d,  $J$  = 1.9 Hz, 1H), 7.50 – 7.40 (m, 2H), 7.32 (d,  $J$  = 8.7 Hz, 1H), 7.25 – 7.15 (m, 4H), 4.34 (t,  $J$  = 7.2 Hz, 2H), 3.18 – 3.07 (m, 2H), 2.05 (s, 3H), 1.43 (t,  $J$  = 7.2 Hz, 3H). <sup>13</sup>C NMR (100 MHz, CDCl<sub>3</sub>)  $\delta$  158.0, 149.7, 140.5, 138.7, 136.7, 126.0, 124.9, 122.8, 122.7, 122.3, 120.4, 119.1, 117.9, 108.7, 121.1-108.6 (m, 4C, -C<sub>4</sub>F<sub>9</sub>), 108.6, 44.3, 40.2 (t,  $J_{C-F}$  = 19.5 Hz), 37.7, 27.7, 14.0, <sup>13</sup>C-NMR for C<sub>4</sub>F<sub>9</sub> could not be assigned. <sup>19</sup>F NMR (376 MHz, CDCl<sub>3</sub>)  $\delta$  -80.8 – -81.2 (m, 3F), -108.2 – -110.4 (m, 2F), -124.2 – -124.5 (m, 2F), -125.5 – -125.8 (m, 2F). IR (film): 2979, 2933, 2893, 1595, 1493, 1427, 1440, 1350, 1234, 1132, 1016, 878, 747 cm<sup>-1</sup>. HRMS (ESI-TOF) exact mass calculated for C<sub>26</sub>H<sub>22</sub>F<sub>9</sub>N<sub>2</sub> [M+H]<sup>+</sup> 533.1634 found 533.1634.

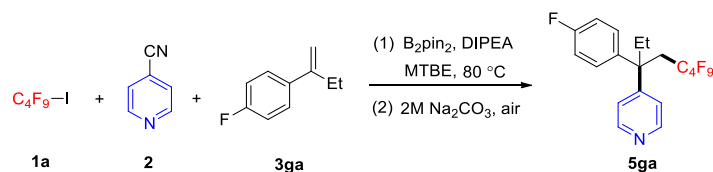

**5ga**: Prepared following *general procedure* using **1a** (34.5  $\mu$ L, 0.2 mmol, 1.0 equiv), 4-cyanopyridine (31.3 mg, 0.3 mmol, 1.5 equiv), B<sub>2</sub>pin<sub>2</sub> (76.2 mg, 0.3 mmol, 1.5 equiv), **3ga** (60.1 mg, 0.4 mmol, 2.0 equiv), DIPEA (33.1  $\mu$ L, 0.4 mmol, 0.2 equiv) and MTBE (1 mL) at 80 °C. After 24 h, the reaction mixture was isolated with preparative TLC on silica (PE/EA = 20:1) to afford the product **5ga** (49.2 mg, 55% yield).

**5ga**: Pale-yellow oil; <sup>1</sup>H NMR (400 MHz, CDCl<sub>3</sub>)  $\delta$  8.53 (d,  $J$  = 5.0 Hz, 2H), 7.11 – 7.06 (m, 4H), 7.01 – 6.96 (m, 2H), 2.99 – 2.89 (m, 2H), 2.41 – 2.36 (m, 2H), 0.71 (t,  $J$  = 7.3 Hz, 3H). <sup>13</sup>C NMR (100 MHz, CDCl<sub>3</sub>)  $\delta$  161.5 (d,  $J_{C-F}$  = 246.9 Hz), 156.3, 149.7, 141.0 (d,  $J_{C-F}$  = 3.4 Hz), 129.1 (d,  $J_{C-F}$  = 8.0 Hz), 122.7, 115.4 (d,  $J_{C-F}$  = 21.3 Hz), 121.2-108.7 (m, 4C, -C<sub>4</sub>F<sub>9</sub>), 47.5, 35.3 (t,  $J_{C-F}$  = 19.1 Hz), 30.9, 8.51, <sup>13</sup>C-NMR for C<sub>4</sub>F<sub>9</sub> could

not be assigned.  $^{19}\text{F}$  NMR (376 MHz,  $\text{CDCl}_3$ )  $\delta$  -81.0 – -81.1 (m, 3F), -110.9 – -111.0 (m, 2F), -115.5 – -115.6 (m, 1F), -124.4 – -124.6 (m, 2F), -125.6 – -125.7 (m, 2F); IR (film): 2980, 2945, 2889, 1595, 1456, 1353, 1234, 1167, 1133, 1025, 879, 735  $\text{cm}^{-1}$ . HRMS (ESI-TOF) exact mass calculated for  $\text{C}_{19}\text{H}_{16}\text{F}_{10}\text{N}$   $[\text{M}+\text{H}]^+$  448.1118 found 448.1120.

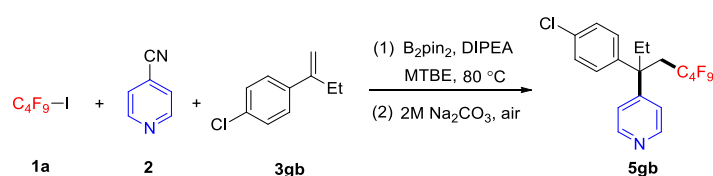

**5gb:** Prepared following *general procedure* using **1a** (34.5  $\mu\text{L}$ , 0.2 mmol, 1.0 equiv), 4-cyanopyridine (31.3 mg, 0.3 mmol, 1.5 equiv),  $\text{B}_2\text{pin}_2$  (76.2 mg, 0.3 mmol, 1.5 equiv), **3gb** (66.4 mg, 0.4 mmol, 2.0 equiv), DIPEA (33.1  $\mu\text{L}$ , 0.4 mmol, 0.2 equiv) and MTBE (1 mL) at 80  $^\circ\text{C}$ . After 24 h, the reaction mixture was isolated with preparative TLC on silica (PE/EA = 20:1) to afford the product **5gb** (44.5 mg, 48% yield).

**5gb:** Pale-yellow oil;  $^1\text{H}$  NMR (400 MHz,  $\text{CDCl}_3$ )  $\delta$  8.58 – 8.50 (m, 2H), 7.32 – 7.23 (m, 2H), 7.11 – 7.03 (m, 4H), 3.00 – 2.88 (m, 2H), 2.43 – 2.34 (m, 2H), 0.72 (t,  $J = 7.3$  Hz, 3H).  $^{13}\text{C}$  NMR (100 MHz,  $\text{CDCl}_3$ )  $\delta$  156.0, 149.7, 143.8, 133.0, 128.8, 128.7, 122.7, 121.3-108.3 (m, 4C,  $-\text{C}_4\text{F}_9$ ), 47.6, 35.2 (t,  $J_{\text{C-F}} = 19.1$  Hz), 30.7, 8.49,  $^{13}\text{C}$ -NMR for  $\text{C}_4\text{F}_9$  could not be assigned.  $^{19}\text{F}$  NMR (376 MHz,  $\text{CDCl}_3$ )  $\delta$  -80.8 – -81.4 (m, 3F), -110.6 – -111.2 (m, 2F), -124.3 – -124.7 (m, 2F), -125.4 – -126.0 (m, 2F). IR (film): 2979, 2944, 2888, 1594, 1494, 1353, 1233, 1133, 1100, 1013, 871, 721  $\text{cm}^{-1}$ . HRMS (ESI-TOF) exact mass calculated for  $\text{C}_{19}\text{H}_{16}\text{F}_9\text{NCl}$   $[\text{M}+\text{H}]^+$  464.0822 found 464.0822.

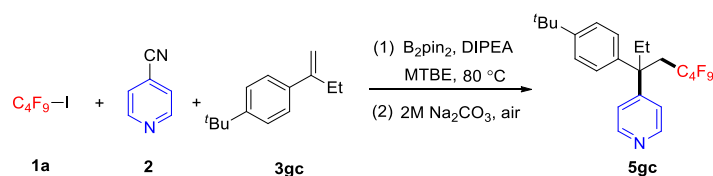

**5gc:** Prepared following *general procedure* using **1a** (34.5  $\mu\text{L}$ , 0.2 mmol, 1.0 equiv), 4-cyanopyridine (31.3 mg, 0.3 mmol, 1.5 equiv),  $\text{B}_2\text{pin}_2$  (76.2 mg, 0.3 mmol, 1.5 equiv), **3gc** (94.1 mg, 0.4 mmol, 2.0 equiv), DIPEA (33.1  $\mu\text{L}$ , 0.4 mmol, 0.2 equiv) and MTBE (1 mL) at 80  $^\circ\text{C}$ . After 24 h, the reaction mixture was isolated with

preparative TLC on silica (PE/EA = 20:1) to afford the product **5gc** (58.2 mg, 60% yield).

**5gc**: Pale-yellow oil;  $^1\text{H}$  NMR (400 MHz,  $\text{CDCl}_3$ )  $\delta$  8.50 (d,  $J = 4.9$  Hz, 2H), 7.27 (d,  $J = 6.6$  Hz, 2H), 7.13 – 7.10 (m, 2H), 7.01 – 6.97 (m, 2H), 3.01 – 2.88 (m, 2H), 2.46 – 2.29 (m, 2H), 1.28 (s, 9H), 0.70 (t,  $J = 7.3$  Hz, 3H).  $^{13}\text{C}$  NMR (100 MHz,  $\text{CDCl}_3$ )  $\delta$  156.6, 149.7, 149.6, 142.0, 126.9, 125.3, 122.9, 122.1-110.3 (m, 4C,  $-\text{C}_4\text{F}_9$ ), 47.5, 35.3 (t,  $J_{\text{C-F}} = 19.1$  Hz), 34.4, 31.3, 30.6, 8.5,  $^{13}\text{C}$ -NMR for  $\text{C}_4\text{F}_9$  could not be assigned.  $^{19}\text{F}$  NMR (376 MHz,  $\text{CDCl}_3$ )  $\delta$  -81.0 – -81.1 (m, 3F), -110.9 – -111.0 (m, 2F), -124.5 – -124.7 (m, 2F), -125.6 – -125.8 (m, 2F). IR (film): 3030, 2967, 2907, 1594, 1514, 1410, 1385, 1352, 1235, 1133, 1024, 879, 737  $\text{cm}^{-1}$ . HRMS (ESI-TOF) exact mass calculated for  $\text{C}_{23}\text{H}_{25}\text{F}_9\text{N}$   $[\text{M}+\text{H}]^+$  486.1838 found 486.1838.

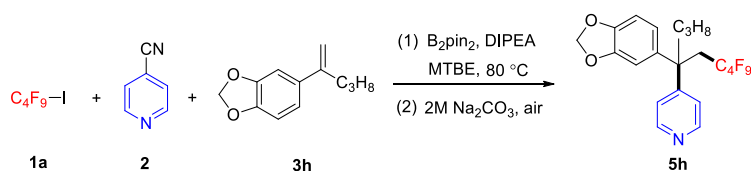

**5h**: Prepared following *general procedure* using **1a** (34.5  $\mu\text{L}$ , 0.2 mmol, 1.0 equiv), 4-cyanopyridine (31.3 mg, 0.3 mmol, 1.5 equiv),  $\text{B}_2\text{pin}_2$  (76.2 mg, 0.3 mmol, 1.5 equiv), **3h** (76.1 mg, 0.4 mmol, 2.0 equiv), DIPEA (33.1  $\mu\text{L}$ , 0.4 mmol, 0.2 equiv) and MTBE (1 mL) at  $80\text{ }^\circ\text{C}$ . After 24 h, the reaction mixture was isolated with preparative TLC on silica (PE/EA = 20:1) to afford the product **5h** (43.9 mg, 45% yield).

**5h**: Pale-yellow oil;  $^1\text{H}$  NMR (400 MHz,  $\text{CDCl}_3$ )  $\delta$  8.51 (d,  $J = 5.1$  Hz, 2H), 7.11 – 7.09 (m, 2H), 6.73 (d,  $J = 8.2$  Hz, 1H), 6.63 (dd,  $J = 8.2, 2.0$  Hz, 1H), 6.50 (d,  $J = 1.9$  Hz, 1H), 5.93 (s, 2H), 2.96 – 2.86 (m, 2H), 2.27 – 2.22 (m, 2H), 1.06 – 0.99 (m, 2H), 0.89 (d,  $J = 7.0$  Hz, 3H).  $^{13}\text{C}$  NMR (100 MHz,  $\text{CDCl}_3$ )  $\delta$  156.8, 149.6, 148.0, 146.4, 139.5, 122.5, 120.1, 108.1, 107.8, 121.3-108.3 (m, 4C,  $-\text{C}_4\text{F}_9$ ), 101.3, 47.3, 40.3, 35.9 (t,  $J_{\text{C-F}} = 19.0$  Hz), 17.4, 14.4,  $^{13}\text{C}$ -NMR for  $\text{C}_4\text{F}_9$  could not be assigned.  $^{19}\text{F}$  NMR (376 MHz,  $\text{CDCl}_3$ )  $\delta$  -80.0 – -81.9 (m, 3F), -110.6 – -111.6 (m, 2F), -123.7 – -125.0 (m, 2F), -125.4 – -126.0 (m, 2F). IR (film): 2965, 2936, 2879, 1595, 1505, 1489, 1435, 1352, 1236, 1133, 1041, 1017, 883, 737  $\text{cm}^{-1}$ ; HRMS (ESI-TOF) exact mass calculated for  $\text{C}_{21}\text{H}_{19}\text{F}_9\text{NO}_2$  488.1267  $[\text{M}+\text{H}]^+$  found 488.1267.



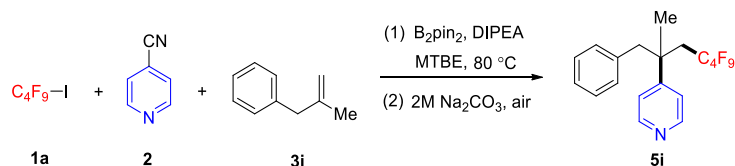

**5i:** Prepared following *general procedure* using **1a** (34.5  $\mu\text{L}$ , 0.2 mmol, 1.0 equiv), 4-cyanopyridine (31.3 mg, 0.3 mmol, 1.5 equiv),  $\text{B}_2\text{pin}_2$  (76.2 mg, 0.3 mmol, 1.5 equiv), **3i** (52.8 mg, 0.4 mmol, 2.0 equiv), DIPEA, (33.1  $\mu\text{L}$ , 0.4 mmol, 0.2 equiv) and MTBE (1 mL) at 80  $^\circ\text{C}$ . After 24 h, the reaction mixture was isolated with preparative TLC on silica (PE/EA = 20:1) to afford the product **5i** (46.4 mg, 54% yield).

**5i:** Colorless oil;  $^1\text{H}$  NMR (400 MHz,  $\text{CDCl}_3$ )  $\delta$  8.54 (d,  $J = 5.2$  Hz, 2H), 7.21 – 7.13 (m, 5H), 6.75 – 6.71 (m, 2H), 2.97 (d,  $J = 13.3$  Hz, 1H), 2.92 – 2.84 (m, 1H), 2.85 – 2.73 (m, 1H), 2.45 – 2.31 (m, 1H), 1.54 (s, 3H).  $^{13}\text{C}$  NMR (100 MHz,  $\text{CDCl}_3$ )  $\delta$  154.5, 149.4, 135.3, 130.5, 127.9, 126.9, 121.5, 121.3-108.3 (m, 4C,  $-\text{C}_4\text{F}_9$ ), 51.0, 40.4, 39.6 (t,  $J_{\text{C-F}} = 19.9$  Hz), 22.6,  $^{13}\text{C}$ -NMR for  $\text{C}_4\text{F}_9$  could not be assigned.  $^{19}\text{F}$  NMR (376 MHz,  $\text{CDCl}_3$ )  $\delta$  -80.2 – -82.0 (m, 3F), -105.6 – -112.0 (m, 2F), -124.3 – -124.9 (m, 2F), -124.9 – -128.1 (m, 2F). IR (film): 3030, 2984, 2930, 1704, 1596, 1516, 1412, 1353, 1232, 1133, 1075, 1021, 879  $\text{cm}^{-1}$ . HRMS (ESI-TOF) exact mass calculated for  $\text{C}_{19}\text{H}_{17}\text{F}_9\text{N}$   $[\text{M}+\text{H}]^+$  430.1212 found 430.1215.

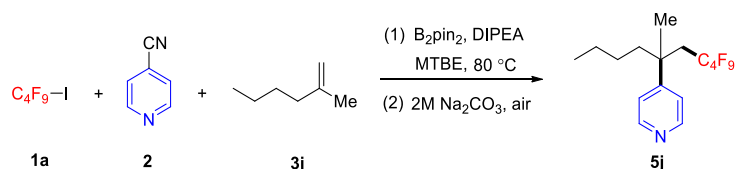

**5j:** Prepared following *general procedure* using **1a** (34.5  $\mu\text{L}$ , 0.2 mmol, 1.0 equiv), 4-cyanopyridine (31.3 mg, 0.3 mmol, 1.5 equiv),  $\text{B}_2\text{pin}_2$  (76.2 mg, 0.3 mmol, 1.5 equiv), **3j** (39.3 mg, 0.4 mmol, 2.0 equiv), DIPEA (33.1  $\mu\text{L}$ , 0.4 mmol, 0.2 equiv) and MTBE (1 mL) at 80  $^\circ\text{C}$ . After 24 h, the reaction mixture was isolated with preparative TLC on silica (PE/EA = 20:1) to afford the product **5j** (35.6 mg, 44% yield).

**5j:** Colorless oil;  $^1\text{H}$  NMR (400 MHz,  $\text{CDCl}_3$ )  $\delta$  8.58 – 8.52 (m, 2H), 7.23 – 7.19 (m, 2H), 2.68 – 2.52 (m, 1H), 2.38 – 2.24 (m, 1H), 1.77 – 1.64 (m, 2H), 1.53 (d,  $J = 1.9$  Hz, 3H), 1.30 – 1.04 (m, 4H), 0.82 (d,  $J = 7.1$  Hz, 3H).  $^{13}\text{C}$  NMR (100 MHz,  $\text{CDCl}_3$ )  $\delta$  155.3, 149.9, 121.3, 121.3-108.3 (m, 4C,  $-\text{C}_4\text{F}_9$ ), 43.6, 41.0 (t,  $J_{\text{C-F}} = 20.5$  Hz), 39.5,

25.8, 23.1, 23.0, 13.9,  $^{13}\text{C}$  NMR for  $\text{C}_4\text{F}_9$  could not be assigned.  $^{19}\text{F}$  NMR (376 MHz,  $\text{CDCl}_3$ )  $\delta$  -80.6 – -81.6 (m, 3F), -107.9 – -111.7 (m, 2F), -124.3 – -125.0 (m, 2F), -125.4 – -126.2 (m, 2F). IR (film): 2961, 2936, 2865, 1596, 1551, 1412, 1352, 1236, 1132, 1019, 878, 736  $\text{cm}^{-1}$ ; HRMS (ESI-TOF) exact mass calculated for  $\text{C}_{16}\text{H}_{19}\text{F}_9\text{N}$   $[\text{M}+\text{H}]^+$  396.1368 found 396.1372.

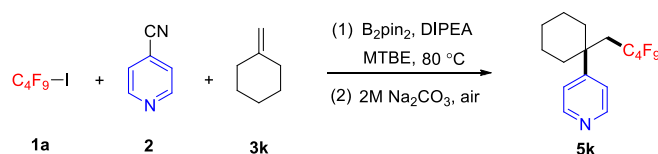

**5k:** Prepared following *general procedure* using **1a** (34.5  $\mu\text{L}$ , 0.2 mmol, 1.0 equiv), 4-cyanopyridine (31.3 mg, 0.3 mmol, 1.5 equiv),  $\text{B}_2\text{pin}_2$  (76.2 mg, 0.3 mmol, 1.5 equiv), **3k** (38.4 mg, 0.4 mmol, 2.0 equiv), DIPEA (33.1  $\mu\text{L}$ , 0.4 mmol, 0.2 equiv) and MTBE (1 mL) at 80  $^\circ\text{C}$ . After 24 h, the reaction mixture was isolated with preparative TLC on silica (PE/EA = 20:1) to afford the product **5k** (26.7 mg, 34% yield).

**5k:** Colorless oil;  $^1\text{H}$  NMR (400 MHz,  $\text{CDCl}_3$ )  $\delta$  8.56 (d,  $J$  = 5.5 Hz, 2H), 7.31 – 7.27 (m, 2H), 2.43 – 2.32 (m, 2H), 2.23 – 2.16 (m, 2H), 1.86-1.78 (m, 2H), 1.61 – 1.54 (m, 2H), 1.49-1.36 (m, 4H).  $^{13}\text{C}$  NMR (100 MHz,  $\text{CDCl}_3$ )  $\delta$  154.5, 149.9, 122.2, 121.5-110.3 (m, 4C,  $-\text{C}_4\text{F}_9$ ), 41.8 – 41.6 (m), 39.8, 36.4, 25.8, 22.0,  $^{13}\text{C}$ -NMR for  $\text{C}_4\text{F}_9$  could not be assigned.  $^{19}\text{F}$  NMR (376 MHz,  $\text{CDCl}_3$ )  $\delta$  -80.5 – -81.9 (m, 3F), -109.6 – -110.6 (m, 2F), -124.2 – 124.9 (m, 2F), -125.5 – 126.1 (m, 2F). IR (film): 3027, 2939, 2864, 1596, 1551, 1456, 1411, 1351, 1236, 1132, 1012, 735  $\text{cm}^{-1}$ . HRMS (ESI-TOF) exact mass calculated for  $\text{C}_{16}\text{H}_{17}\text{F}_9\text{N}$   $[\text{M}+\text{H}]^+$  394.1212 found 394.1216.

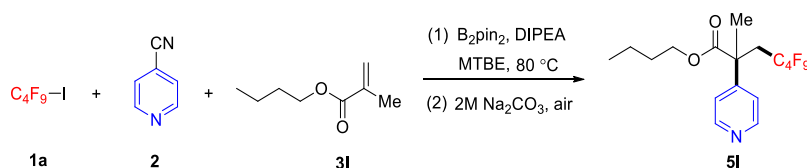

**5l:** Prepared following *general procedure* using **1a** (34.5  $\mu\text{L}$ , 0.2 mmol, 1.0 equiv), 4-cyanopyridine (31.3 mg, 0.3 mmol, 1.5 equiv),  $\text{B}_2\text{pin}_2$  (76.2 mg, 0.3 mmol, 1.5 equiv), **3l** (56.8 mg, 0.4 mmol, 2.0 equiv), DIPEA (33.1  $\mu\text{L}$ , 0.4 mmol, 0.2 equiv) and MTBE (1 mL) at 80  $^\circ\text{C}$ . After 24 h, the reaction mixture was isolated with preparative TLC on silica (PE/EA = 20:1) to afford the product **5l** (22.0 mg, 25% yield).

**5l:** Colorless oil;  $^1\text{H}$  NMR (400 MHz,  $\text{CDCl}_3$ )  $\delta$  8.54 (d,  $J = 5.2$  Hz, 2H), 7.22 – 7.19 (m, 2H), 4.05 (t,  $J = 6.6$  Hz, 2H), 3.14 – 3.00 (m, 1H), 2.60 – 2.46 (m, 1H), 1.72 (s, 3H), 1.52 – 1.45 (m, 2H), 1.22 – 1.16 (m, 2H), 0.80 (t,  $J = 7.4$  Hz, 3H).  $^{13}\text{C}$  NMR (100 MHz,  $\text{CDCl}_3$ )  $\delta$  172.9, 151.0, 150.3, 120.8, 118.7-110.1 (m, 4C,  $-\text{C}_4\text{F}_9$ ), 66.1, 47.3, 38.2 (t,  $J_{\text{C-F}} = 19.7$  Hz), 30.3, 21.7, 19.0, 13.6,  $^{13}\text{C}$ -NMR for  $\text{C}_4\text{F}_9$  could not be assigned.  $^{19}\text{F}$  NMR (376 MHz,  $\text{CDCl}_3$ )  $\delta$  -81.0 – -81.1 (m, 3F), -106.6 – -113.3 (m, 2F), -124.6 – -124.8 (2F), -125.7 – -125.8 (m, 2F). IR (film): 2985, 2928, 1747, 1710, 1512, 1226, 1130, 913, 743  $\text{cm}^{-1}$ ; HRMS (ESI-TOF) exact mass calculated for  $\text{C}_{17}\text{H}_{19}\text{F}_9\text{NO}_2$   $[\text{M}+\text{H}]^+$  440.1267 found 440.1271.

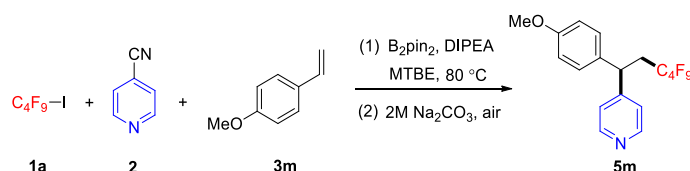

**5m:** Prepared following *general procedure* using **1a** (34.5  $\mu\text{L}$ , 0.2 mmol, 1.0 equiv), 4-cyanopyridine (31.3 mg, 0.3 mmol, 1.5 equiv),  $\text{B}_2\text{pin}_2$  (76.2 mg, 0.3 mmol, 1.5 equiv), **3m** (53.6 mg, 0.4 mmol, 2.0 equiv), DIPEA (33.1  $\mu\text{L}$ , 0.4 mmol, 0.2 equiv) and MTBE (1 mL) at  $80^\circ\text{C}$ . After 24 h, the reaction mixture was isolated with preparative TLC on silica (PE/EA = 20:1) to afford the product **5m** (30.2 mg, 35% yield).

**5m:** Pale-yellow oil;  $^1\text{H}$  NMR (400 MHz,  $\text{CDCl}_3$ )  $\delta$  8.59 – 8.49 (m, 2H), 7.21 – 7.18 (m, 2H), 7.16 – 7.12 (m, 2H), 6.88 – 6.85 (m, 2H), 4.38 (t,  $J = 7.1$  Hz, 1H), 3.78 (s, 3H), 2.91 – 2.80 (m, 2H).  $^{13}\text{C}$  NMR (100 MHz,  $\text{CDCl}_3$ )  $\delta$  158.9, 152.3, 150.0, 133.4, 128.5, 122.9, 114.2, 120.4-109.1 (m, 4C,  $-\text{C}_4\text{F}_9$ ), 55.4, 42.9, 35.7 (t,  $J_{\text{C-F}} = 21.0$  Hz),  $^{13}\text{C}$ -NMR for  $\text{C}_4\text{F}_9$  could not be assigned.  $^{19}\text{F}$  NMR (376 MHz,  $\text{CDCl}_3$ )  $\delta$  -80.6 – -81.4 (m, 3F), -111.8 – -113.7 (m, 2F), -124.0 – -124.7 (m, 2F), -125.6 – -126.3 (m, 2F). IR (film): 2935, 2840, 1611, 1596, 1513, 1464, 1416, 1354, 1235, 1181, 1133, 1036, 880, 740  $\text{cm}^{-1}$ ; HRMS (ESI-TOF) exact mass calculated for  $\text{C}_{18}\text{H}_{15}\text{F}_9\text{NO}$   $[\text{M}+\text{H}]^+$  432.1004 found 432.1004.

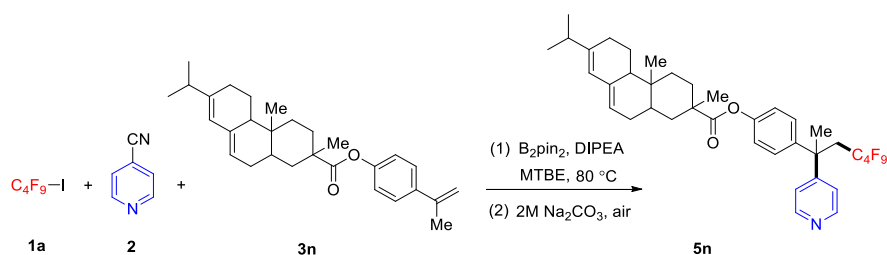

**5n:** Prepared following *general procedure* using **1a** (34.5  $\mu$ L, 0.2 mmol, 1.0 equiv), 4-cyanopyridine (31.3 mg, 0.3 mmol, 1.5 equiv),  $B_2pin_2$  (76.2 mg, 0.3 mmol, 1.5 equiv), **3n** (167.3 mg, 0.4 mmol, 2.0 equiv), DIPEA (33.1  $\mu$ L, 0.4 mmol, 0.2 equiv) and MTBE (1 mL) at 80  $^{\circ}$ C. After 24 h, the reaction mixture was isolated with preparative TLC on silica (PE/EA = 20:1) to afford the product **5n** (57.2 mg, 40% yield).

**5n:** Pale-yellow oil;  $^1H$  NMR (400 MHz,  $CDCl_3$ )  $\delta$  8.54 (d,  $J = 5.1$  Hz, 2H), 7.16 – 7.11 (m, 4H), 6.99 – 6.95 (m, 2H), 5.78 (s, 1H), 5.41 – 5.37 (m, 1H), 3.04 – 2.83 (m, 2H), 2.27 – 2.01 (m, 6H), 1.89 (s, 4H), 1.84 – 1.77 (m, 2H), 1.67 – 1.61 (m, 2H), 1.39 – 1.35 (m, 3H), 1.31 – 1.15 (m, 4H), 1.01 (dd,  $J = 6.8, 3.6$  Hz, 6H), 0.87 (s, 3H).  $^{13}C$  NMR (100 MHz,  $CDCl_3$ )  $\delta$  177.1, 156.8, 150.0, 149.8, 145.7, 143.2, 135.7, 127.7, 122.4, 122.1, 121.7, 120.4, 121.1-110.2 (m, 4C,  $-C_4F_9$ ), 51.0, 47.0, 45.2, 44.1, 39.9 (t,  $J_{C-F} = 19.7$  Hz), 38.4, 37.1, 35.0, 34.7, 27.5, 27.3, 25.9, 22.6, 21.5, 20.9, 18.2, 17.2, 14.1,  $^{13}C$ -NMR for  $C_4F_9$  could not be assigned.  $^{19}F$  NMR (376 MHz,  $CDCl_3$ )  $\delta$  -80.9 – 81.0 (m, 3F), -109.1 – -109.4 (m, 2F), -124.4 – -125.5 (m, 2F), -125.6 – -125.7 (m, 2F). IR (film): 2931, 2871, 1745, 1594, 1462, 1411, 1352, 1232, 1173, 1132, 1101, 1016, 908, 734  $cm^{-1}$ ; HRMS (ESI-TOF) exact mass calculated for  $C_{38}H_{43}F_9NO_2$   $[M+H]^+$  716.3145 found 716.3145.

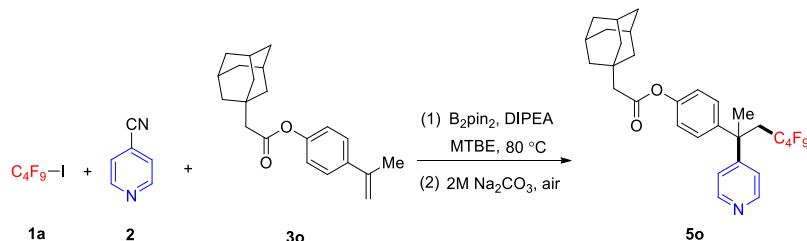

**5o:** Prepared following *general procedure* using **1a** (34.5  $\mu$ L, 0.2 mmol, 1.0 equiv), 4-cyanopyridine (31.3 mg, 0.3 mmol, 1.5 equiv),  $B_2pin_2$  (76.2 mg, 0.3 mmol, 1.5 equiv), **3o** (124.1 mg, 0.4 mmol, 2.0 equiv), DIPEA (33.1  $\mu$ L, 0.4 mmol, 0.2 equiv) and MTBE

(1 mL) at 80 °C. After 24 h, the reaction mixture was isolated with preparative TLC on silica (PE/EA = 20:1) to afford the product **5o** (72.9 mg, 60% yield).

**5o**: Pale-yellow oil;  $^1\text{H}$  NMR (400 MHz,  $\text{CDCl}_3$ )  $\delta$  8.53 (d,  $J = 5.6$  Hz, 2H), 7.16 – 7.11 (m, 4H), 7.06 – 7.02 (m, 2H), 3.03 – 2.86 (m, 2H), 2.28 (s, 2H), 1.99 (s, 3H), 1.89 (s, 3H), 1.74 – 1.62 (m, 12H).  $^{13}\text{C}$  NMR (100 MHz,  $\text{CDCl}_3$ )  $\delta$  170.1, 156.4, 149.9, 149.5, 143.5, 127.7, 122.0, 121.8, 121.2–108.5 (m, 4C,  $-\text{C}_4\text{F}_9$ ), 48.8, 44.0, 42.5, 39.8 (t,  $J_{\text{C-F}} = 19.6$  Hz), 36.7, 33.3, 28.7, 27.2,  $^{13}\text{C}$ -NMR for  $\text{C}_4\text{F}_9$  could not be assigned.  $^{19}\text{F}$  NMR (376 MHz,  $\text{CDCl}_3$ )  $\delta$  -81.0 – -81.1 (m, 3F), -108.3 – -110.3 (m, 2F), -124.4 – -124.6 (m, 2F), -125.6 – -125.8 (m, 2F). IR (film): 2982, 2905, 2849, 1754, 1594, 1507, 1471, 1411, 1351, 1224, 1132, 1016, 851, 735  $\text{cm}^{-1}$ ; HRMS (ESI-TOF) exact mass calculated for  $\text{C}_{30}\text{H}_{31}\text{F}_9\text{NO}_2$   $[\text{M}+\text{H}]^+$  608.2206 found 608.2206.

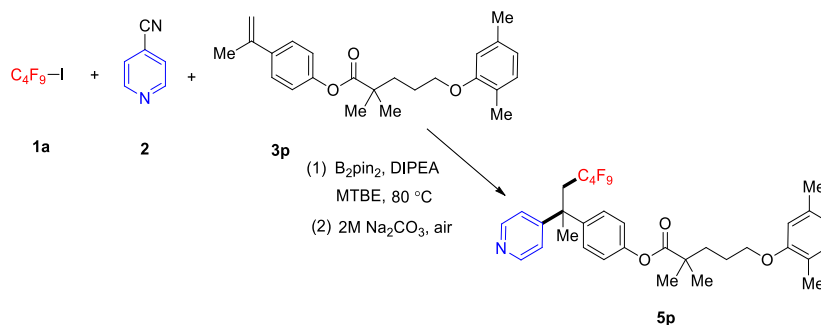

**5p**: Prepared following *general procedure* using **1a** (34.5  $\mu\text{L}$ , 0.2 mmol, 1.0 equiv), 4-cyanopyridine (31.3 mg, 0.3 mmol, 1.5 equiv),  $\text{B}_2\text{pin}_2$  (76.2 mg, 0.3 mmol, 1.5 equiv), **3p** (146.5 mg, 0.4 mmol, 2.0 equiv), DIPEA (33.1  $\mu\text{L}$ , 0.4 mmol, 0.2 equiv) and MTBE (1 mL) at 80 °C. After 24 h, the reaction mixture was isolated with preparative TLC on silica (PE/EA = 20:1) to afford the product **5p** (79.6 mg, 60% yield).

**5p**: Pale-yellow oil;  $^1\text{H}$  NMR (400 MHz,  $\text{CDCl}_3$ )  $\delta$  8.58 – 8.53 (s, 2H), 7.17 – 7.13 (m, 4H), 7.03 – 6.98 (m, 3H), 6.66 (d,  $J = 7.4$  Hz, 1H), 6.62 (s, 1H), 3.98 (s, 2H), 3.06 – 2.89 (m, 2H), 2.30 (s, 3H), 2.17 (s, 3H), 1.89 (d,  $J = 13.8$  Hz, 7H), 1.37 (s, 6H).  $^{13}\text{C}$  NMR (100 MHz,  $\text{CDCl}_3$ )  $\delta$  176.3, 156.9, 156.7, 149.9, 149.8, 143.3, 136.5, 130.4, 127.9, 123.7, 122.1, 121.6, 120.8, 112.0, 120.1–107.3 (m, 4C,  $-\text{C}_4\text{F}_9$ ), 67.8, 44.0, 42.5, 39.8 (t,  $J_{\text{C-F}} = 19.5$  Hz), 37.2, 27.3, 25.3, 25.2, 21.4, 15.8,  $^{13}\text{C}$  NMR for  $\text{C}_4\text{F}_9$  could not be assigned.  $^{19}\text{F}$  NMR (376 MHz,  $\text{CDCl}_3$ )  $\delta$  -80.4 – -81.6 (m, 3F), -107.9 – -110.7 (m, 2F), -124.1 – -124.7 (m, 2F), -125.2 – -126.3 (m, 2F). IR (film): 3025, 2976, 2927, 1754,

1594, 1506, 1473, 1412, 1285, 1173, 1110, 875, 735  $\text{cm}^{-1}$ ; HRMS (ESI-TOF) exact mass calculated for  $\text{C}_{33}\text{H}_{35}\text{F}_9\text{NO}_3$   $[\text{M}+\text{H}]^+$  664.2468 found 664.2467.

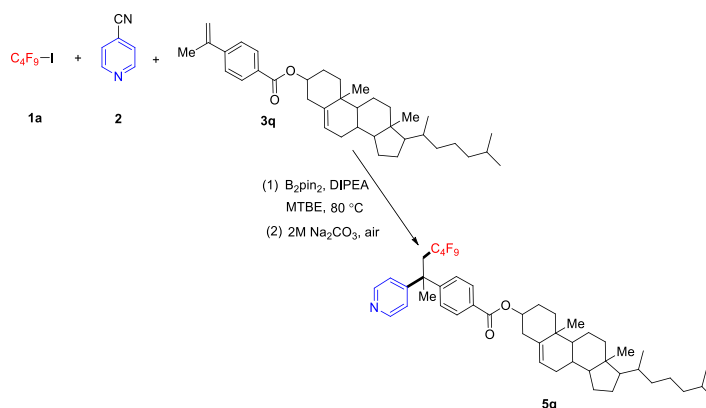

**5q**: Prepared following *general procedure* using **1a** (34.5  $\mu\text{L}$ , 0.2 mmol, 1.0 equiv), 4-cyanopyridine (31.3 mg, 0.3 mmol, 1.5 equiv),  $\text{B}_2\text{pin}_2$  (76.2 mg, 0.3 mmol, 1.5 equiv), **3q** (116.7 mg, 0.4 mmol, 2.0 equiv), DIPEA (33.1  $\mu\text{L}$ , 0.4 mmol, 0.2 equiv) and MTBE (1 mL) at  $80^\circ\text{C}$ . After 24 h, the reaction mixture was isolated with preparative TLC on silica (PE/EA = 20:1) to afford the product **5q** (91.0 mg, 55% yield).

**5q**: Pale-yellow oil;  $^1\text{H}$  NMR (400 MHz,  $\text{CDCl}_3$ )  $\delta$  8.46 (d,  $J = 5.3$  Hz, 2H), 7.92 (d,  $J = 8.6$  Hz, 2H), 7.17 (d,  $J = 8.6$  Hz, 2H), 7.03 – 7.00 (m, 2H), 5.34 (dd,  $J = 4.9, 1.8$  Hz, 1H), 4.82 – 4.73 (m, 1H), 2.98 – 2.87 (m, 2H), 2.37 (d,  $J = 8.1$  Hz, 2H), 1.96 – 1.77 (m, 8H), 1.74 – 1.53 (m, 2H), 1.50 – 1.32 (m, 6H), 1.31 – 1.18 (m, 4H), 1.17 – 1.10 (m, 2H), 1.04 – 0.87 (m, 10H), 0.85 (d,  $J = 6.5$  Hz, 3H), 0.79 (dd,  $J = 6.6, 1.8$  Hz, 6H), 0.61 (s, 3H).  $^{13}\text{C}$  NMR (100 MHz,  $\text{CDCl}_3$ )  $\delta$  165.5, 156.3, 150.7, 150.0, 139.6, 129.9, 129.7, 126.8, 122.9, 121.9, 121.3-108.3 (m, 4C,  $-\text{C}_4\text{F}_9$ ), 74.8, 56.8, 56.2, 50.1, 44.5, 42.4, 39.8, 39.7 (d,  $J_{\text{C-F}} = 21.9$  Hz), 39.4, 38.3, 37.1, 36.7, 36.3, 35.9, 32.1, 32.0, 28.3, 28.1, 27.9, 27.1, 24.4, 23.9, 22.9, 22.6, 21.1, 19.4, 18.8, 11.9,  $^{13}\text{C}$ -NMR for  $\text{C}_4\text{F}_9$  could not be assigned.  $^{19}\text{F}$  NMR (376 MHz,  $\text{CDCl}_3$ )  $\delta$  -80.3 – -81.4 (m, 3F), -108.7 – -109.8 (m, 2F), -123.7 – -124.9 (m, 2F), -125.1 – -126.5 (m, 2F). IR (film): 2947, 2868, 2225, 1721, 1611, 1594, 1469, 1410, 1369, 1318, 1275, 1133, 1017, 909, 736  $\text{cm}^{-1}$ . HRMS (ESI-TOF) exact mass calculated for  $\text{C}_{46}\text{H}_{59}\text{F}_9\text{NO}_2$   $[\text{M}+\text{H}]^+$  828.4397 found 828.4381.

## 5. NMR Spectra

$^1\text{H}$  NMR (400 MHz,  $\text{CDCl}_3$ ):

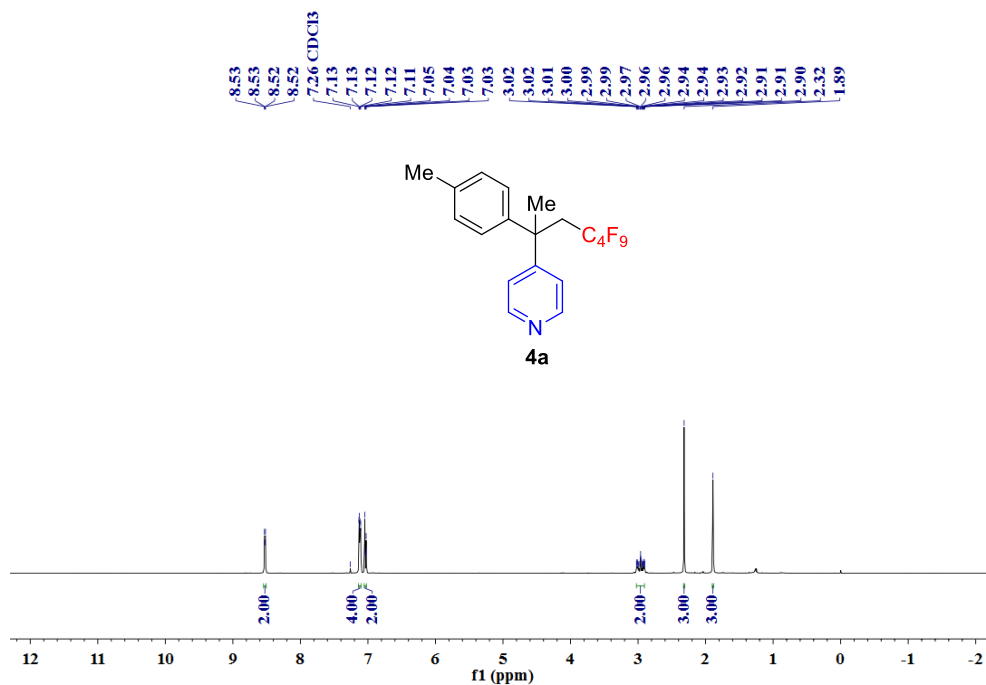

$^{13}\text{C}$  NMR (100 MHz,  $\text{CDCl}_3$ ):

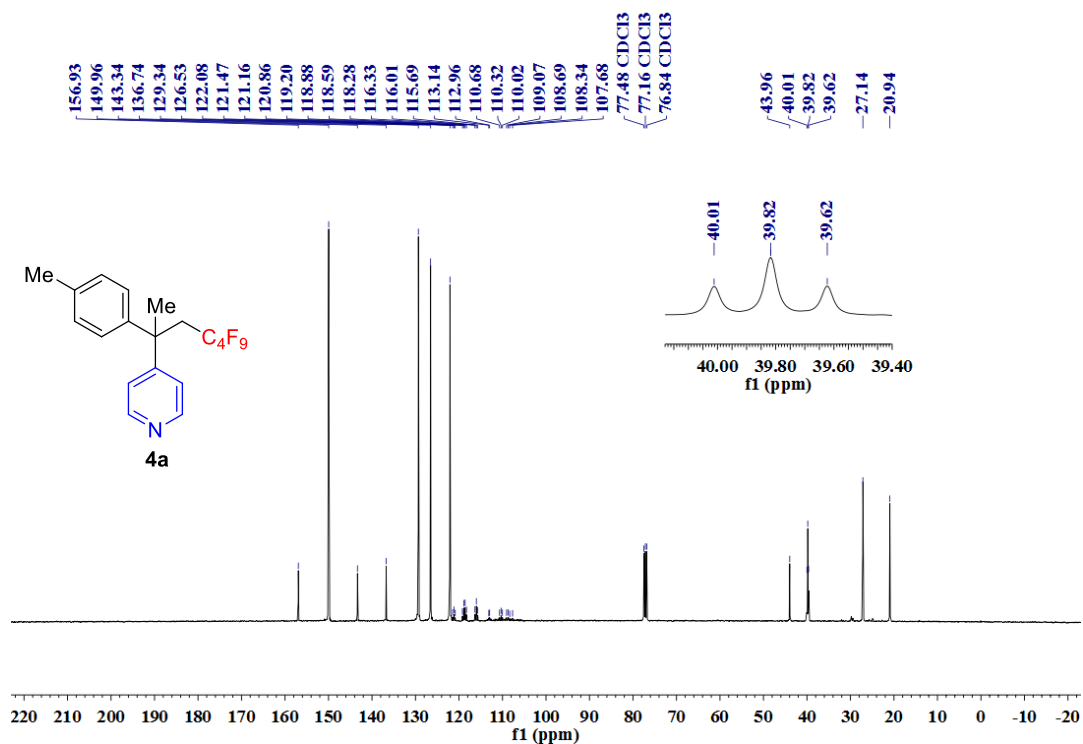

$^{19}\text{F}$  NMR (376 MHz,  $\text{CDCl}_3$ ):

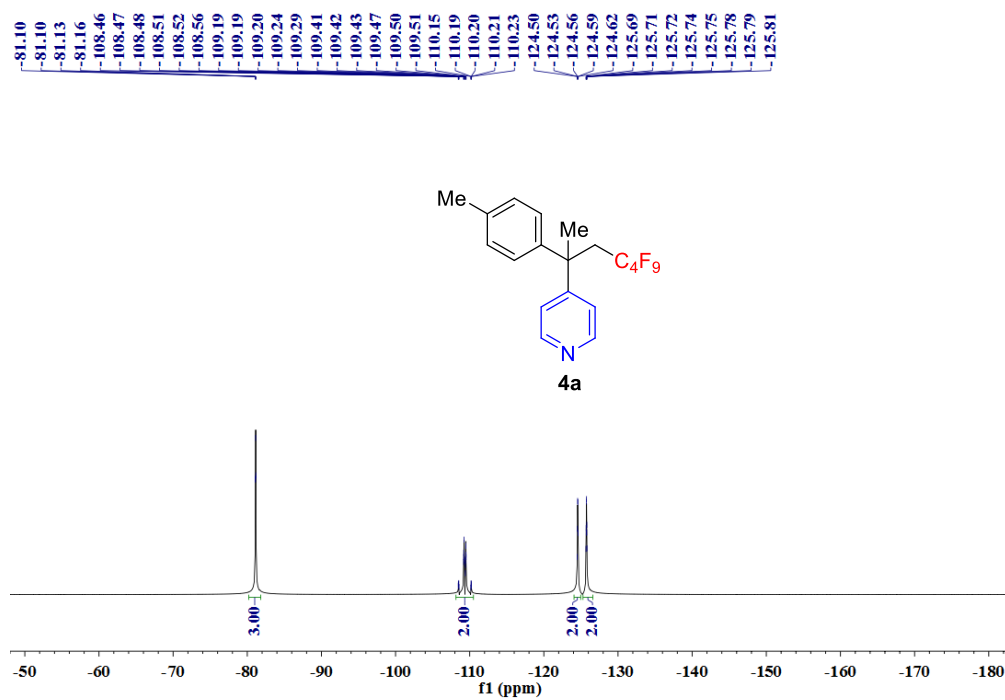

$^1\text{H}$  NMR (400 MHz,  $\text{CDCl}_3$ ):

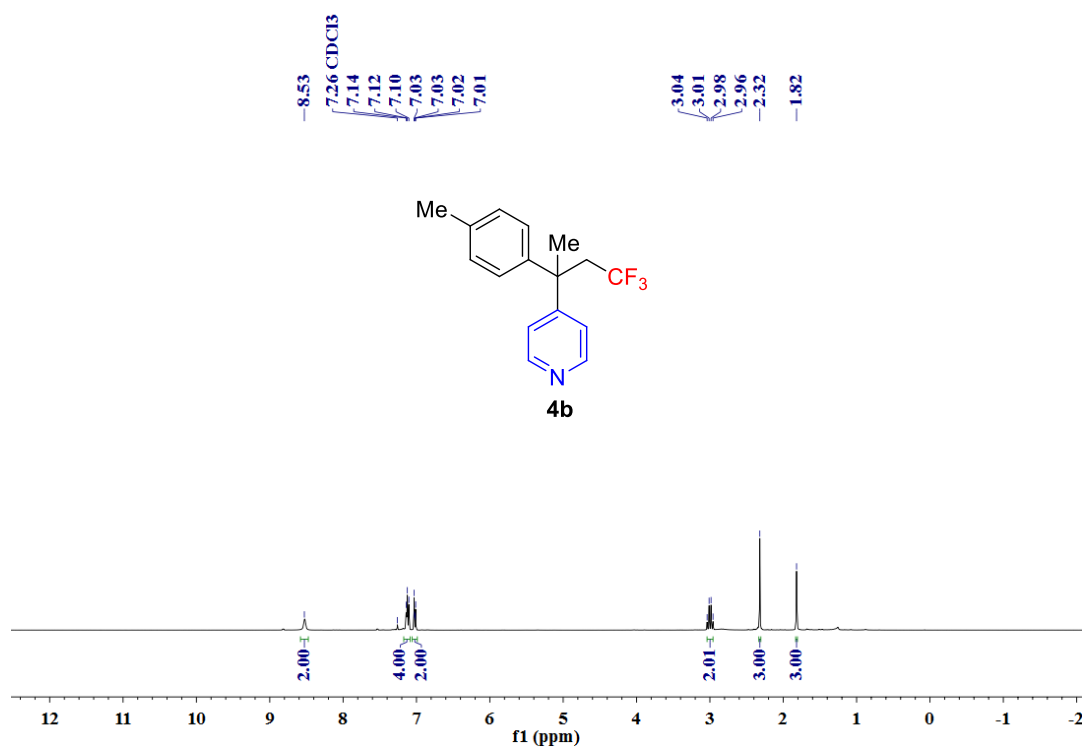



$^{13}\text{C}$  NMR (100 MHz,  $\text{CDCl}_3$ ):

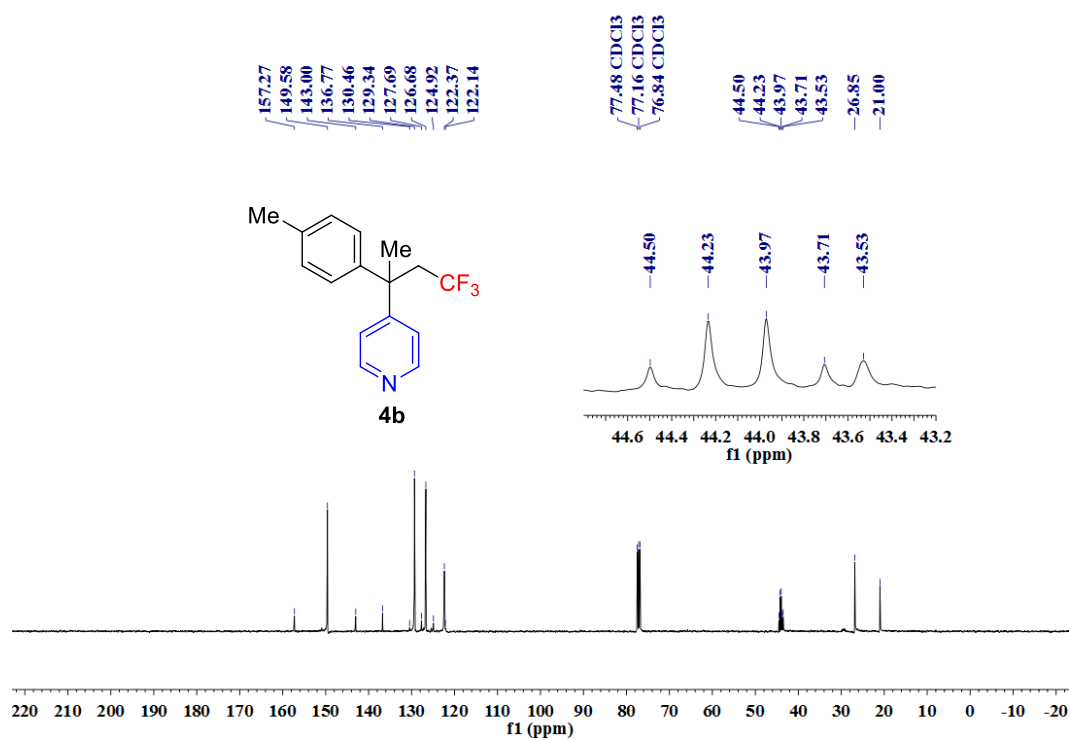

$^{19}\text{F}$  NMR (376 MHz,  $\text{CDCl}_3$ ):

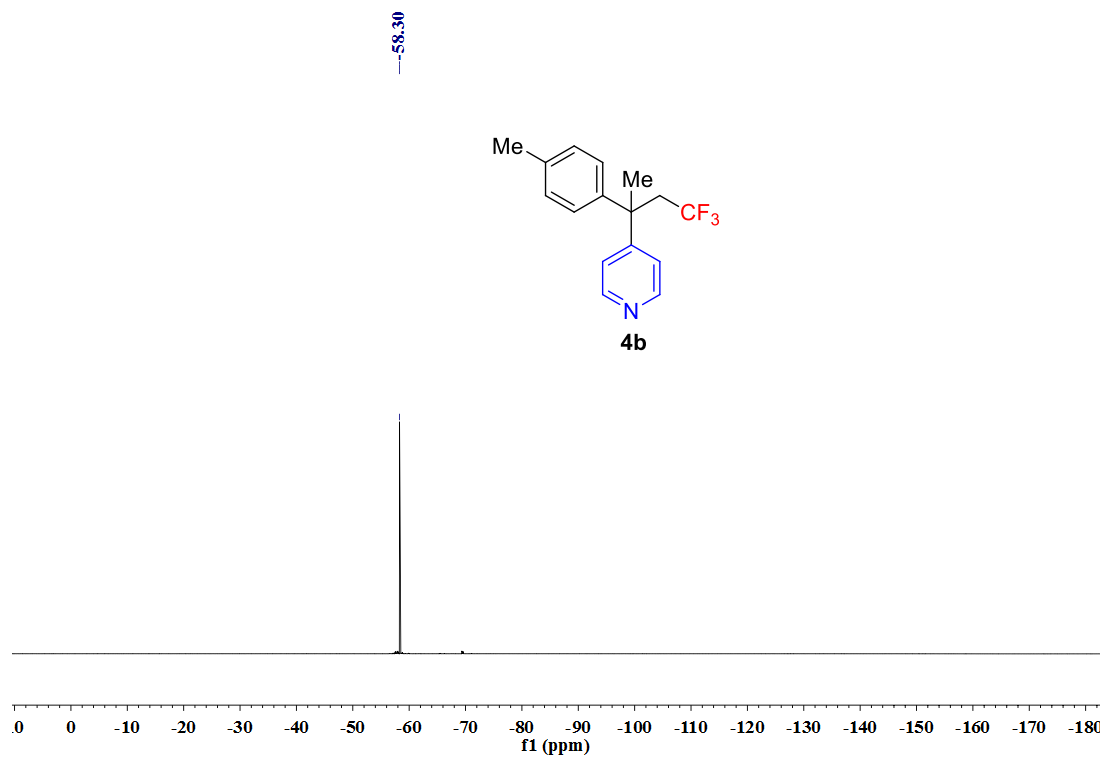

$^1\text{H}$  NMR (400 MHz,  $\text{CDCl}_3$ ):

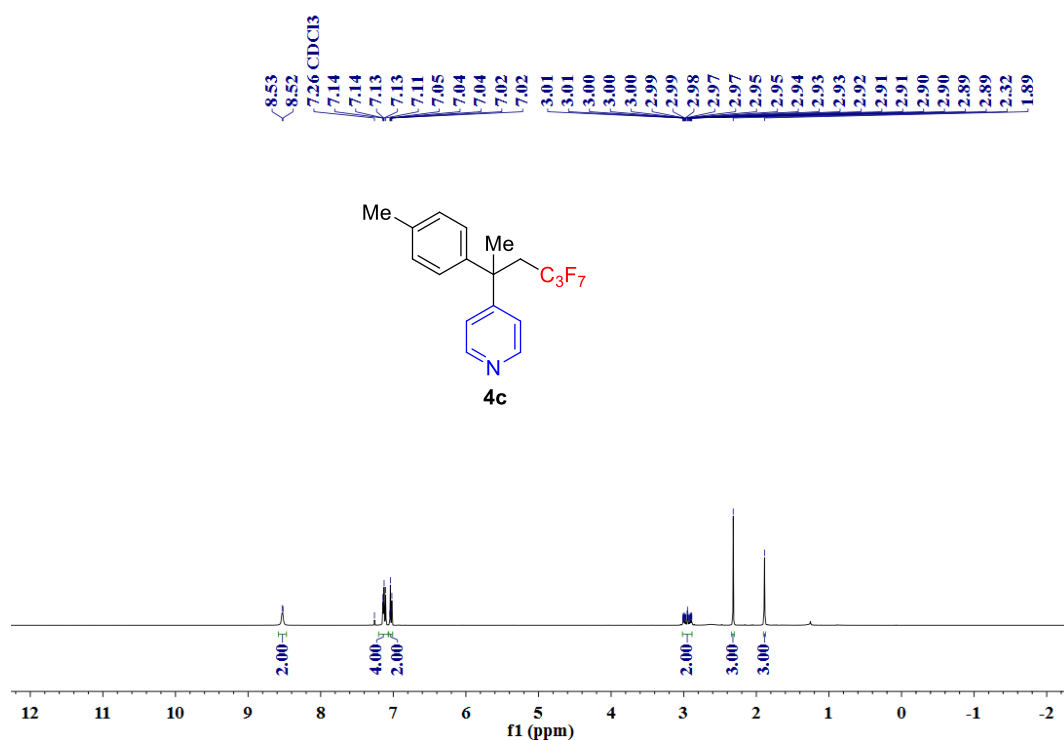

$^{13}\text{C}$  NMR (100 MHz,  $\text{CDCl}_3$ ):

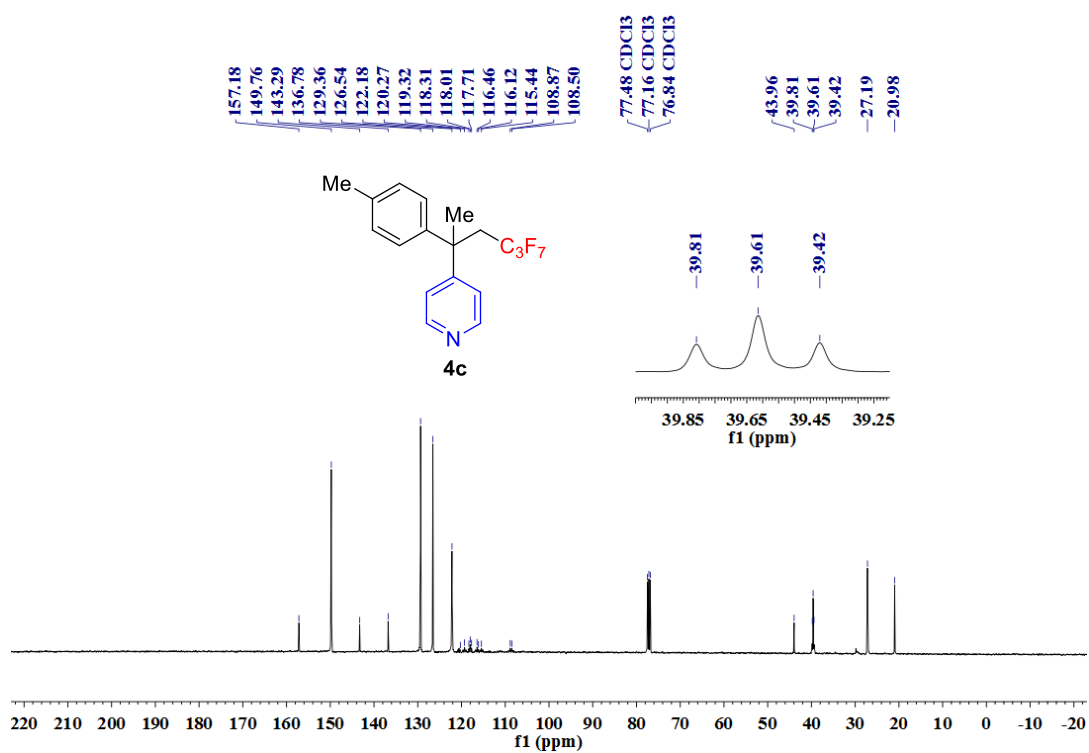

$^{19}\text{F}$  NMR (376 MHz,  $\text{CDCl}_3$ ):

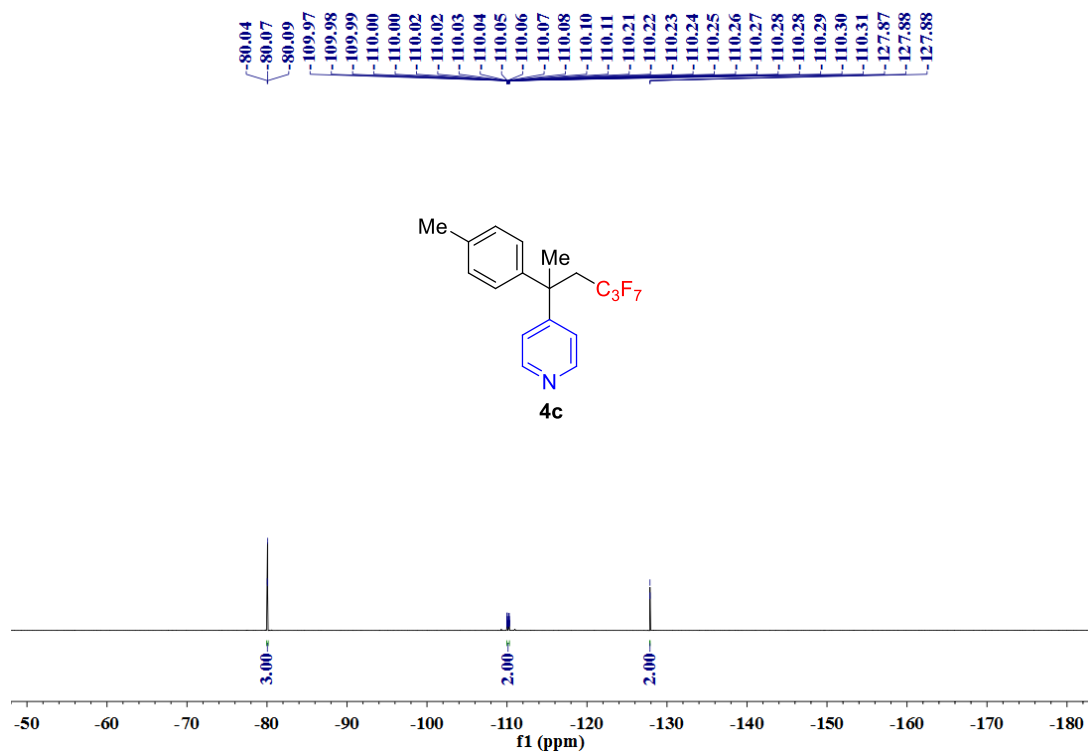

$^1\text{H}$  NMR (400 MHz,  $\text{CDCl}_3$ ):

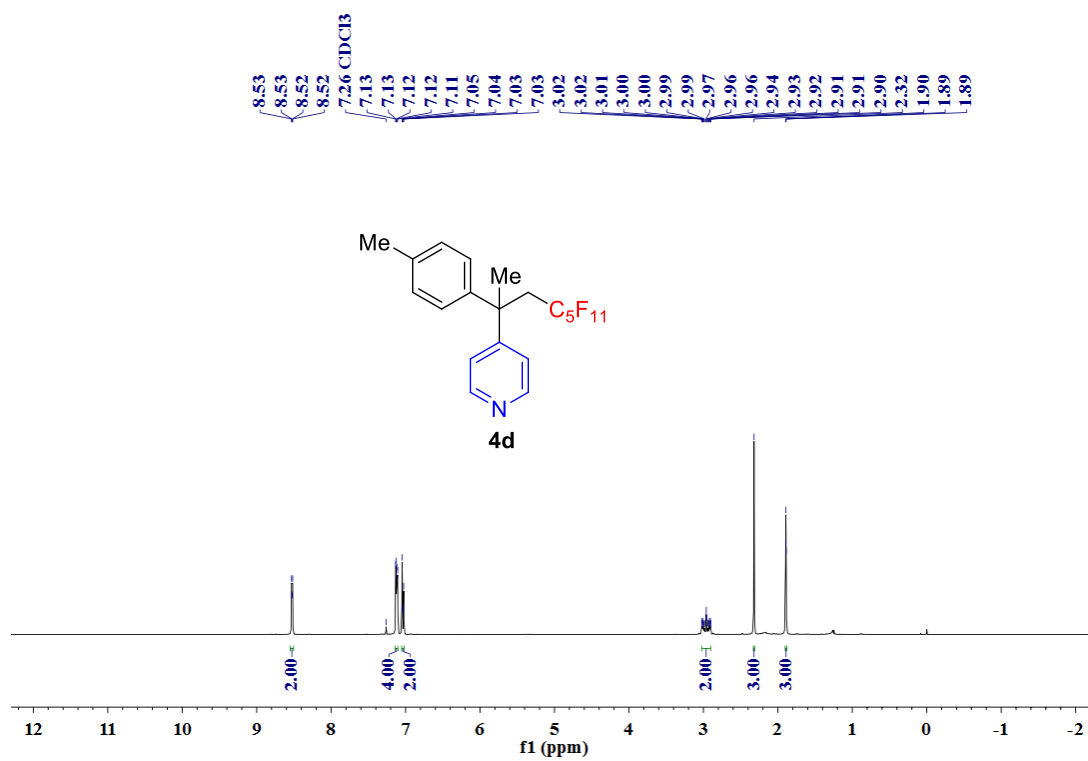

$^{13}\text{C}$  NMR (100 MHz,  $\text{CDCl}_3$ ):

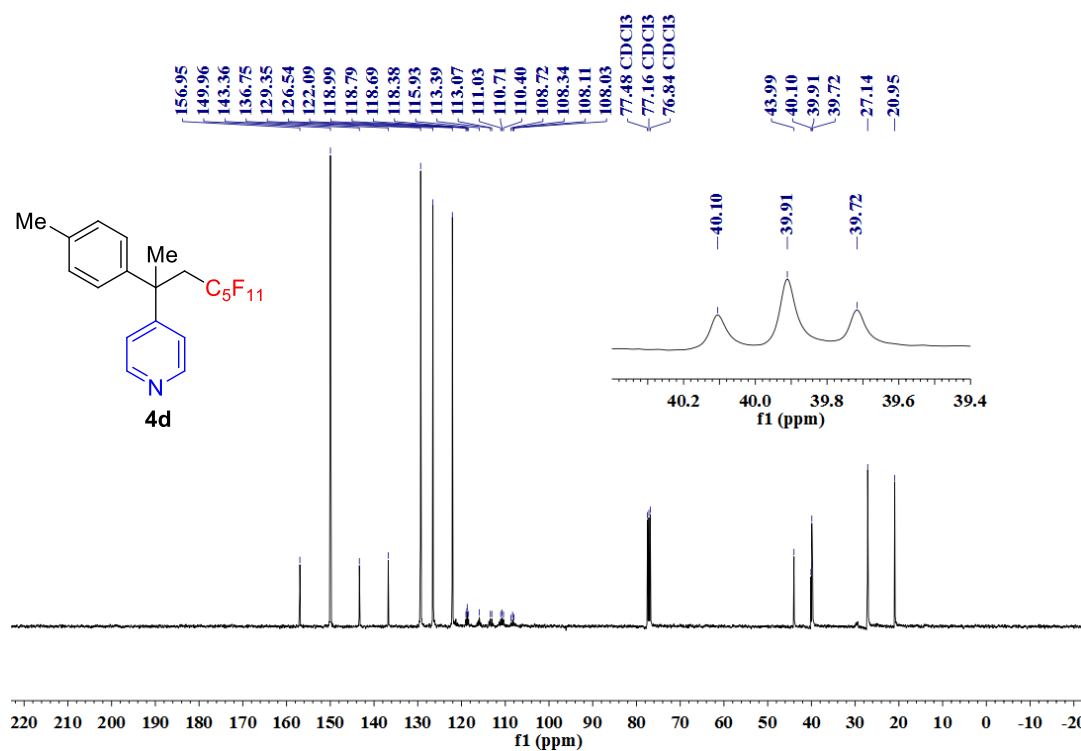

$^{19}\text{F}$  NMR (376 MHz,  $\text{CDCl}_3$ ):

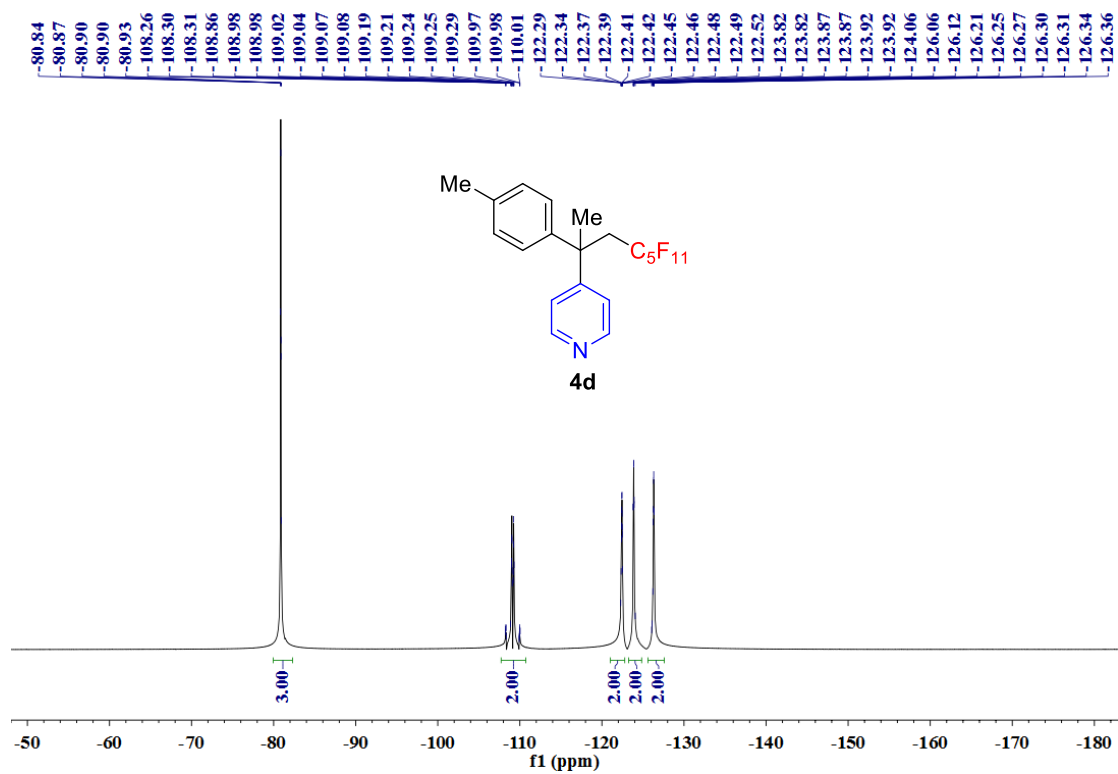

$^1\text{H}$  NMR (400 MHz,  $\text{CDCl}_3$ ):

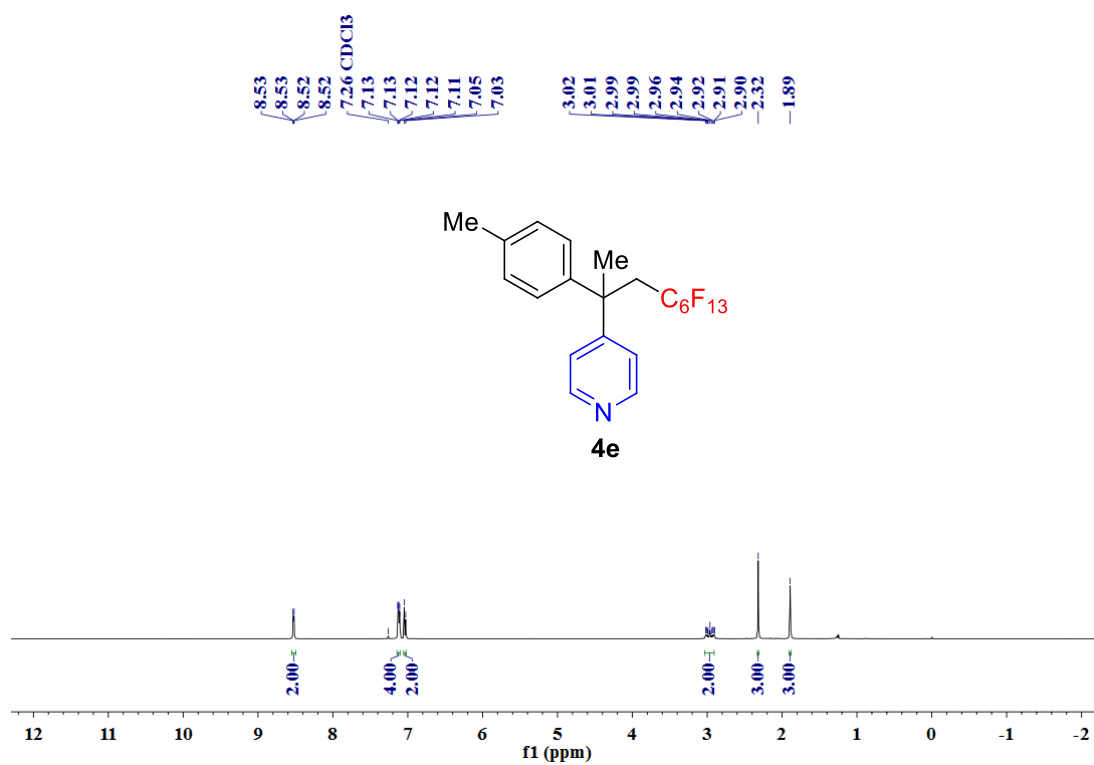

$^{13}\text{C}$  NMR (100 MHz,  $\text{CDCl}_3$ ):

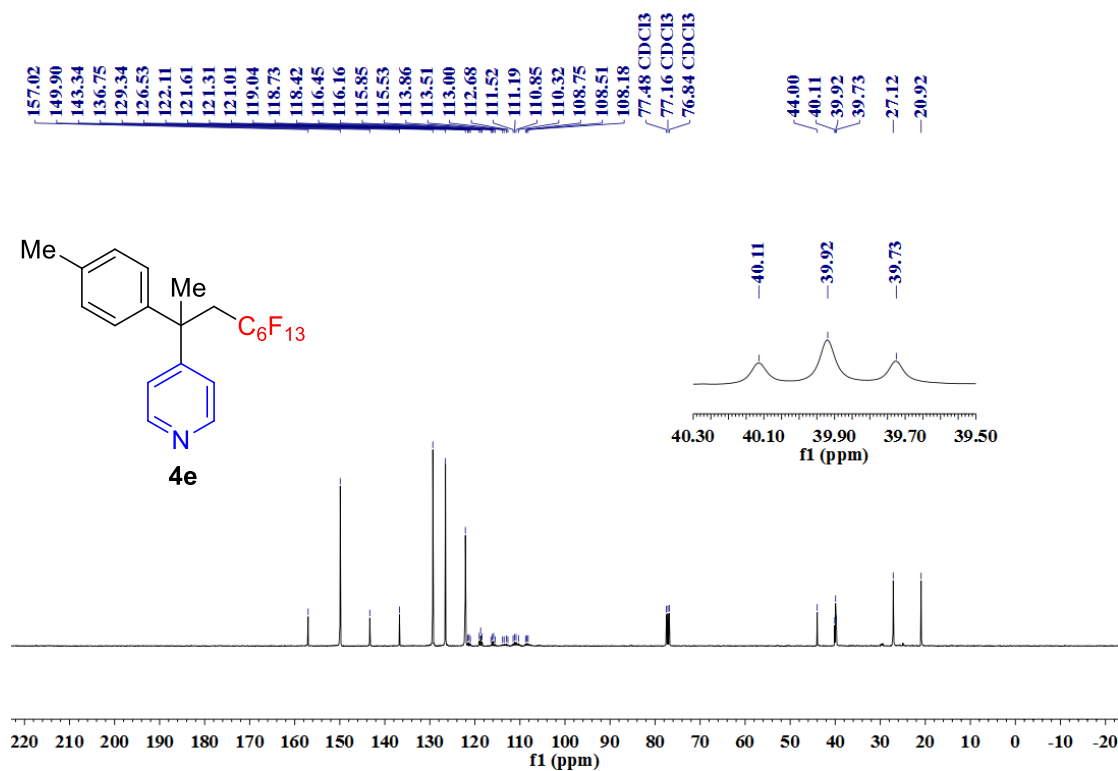

$^{19}\text{F}$  NMR (376 MHz,  $\text{CDCl}_3$ ):

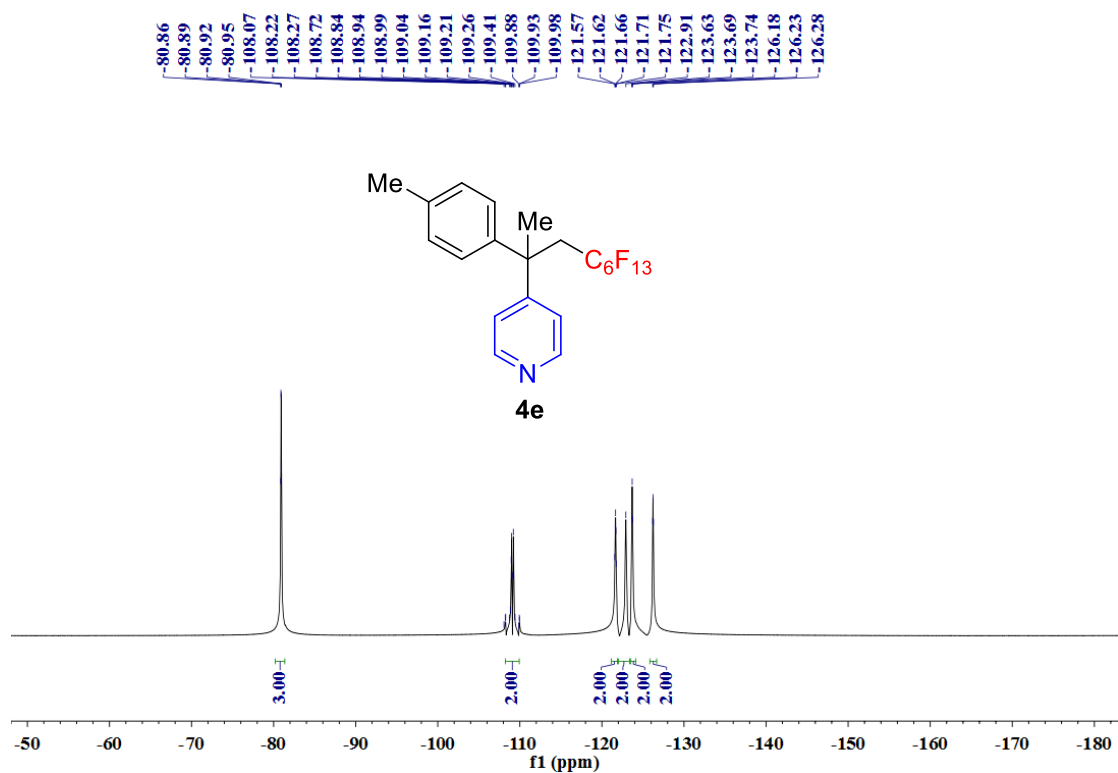

$^1\text{H}$  NMR (400 MHz,  $\text{CDCl}_3$ ):

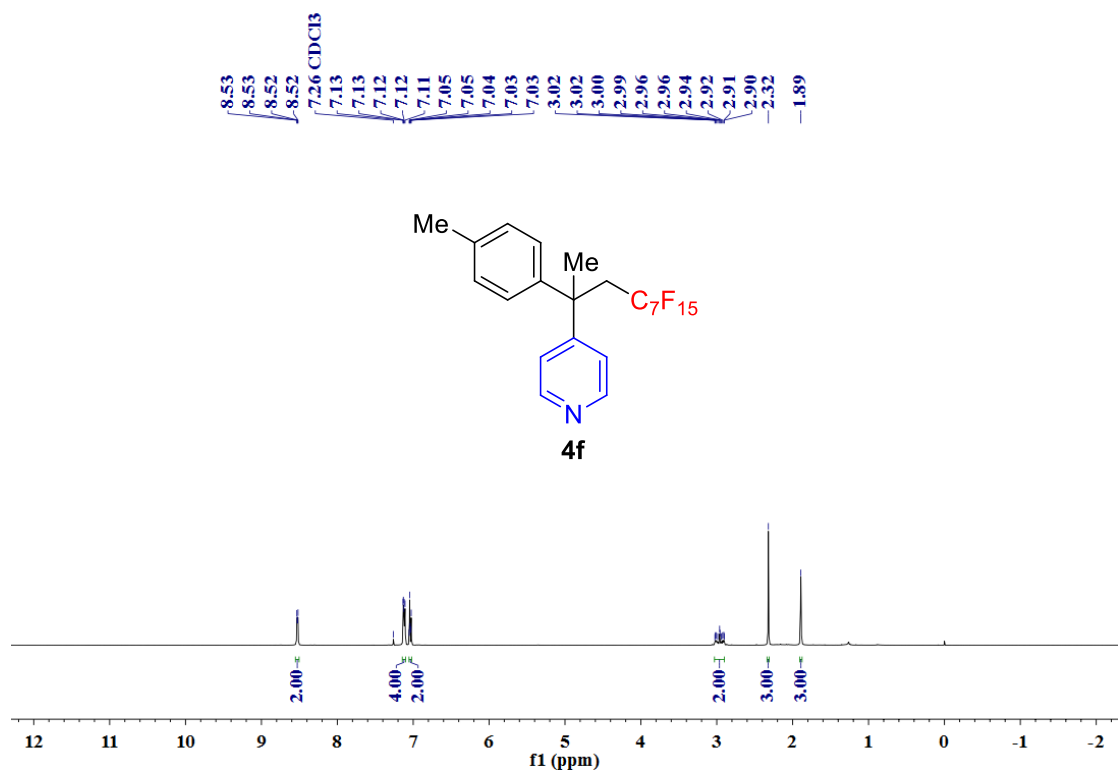

$^{13}\text{C}$  NMR (100 MHz,  $\text{CDCl}_3$ ):

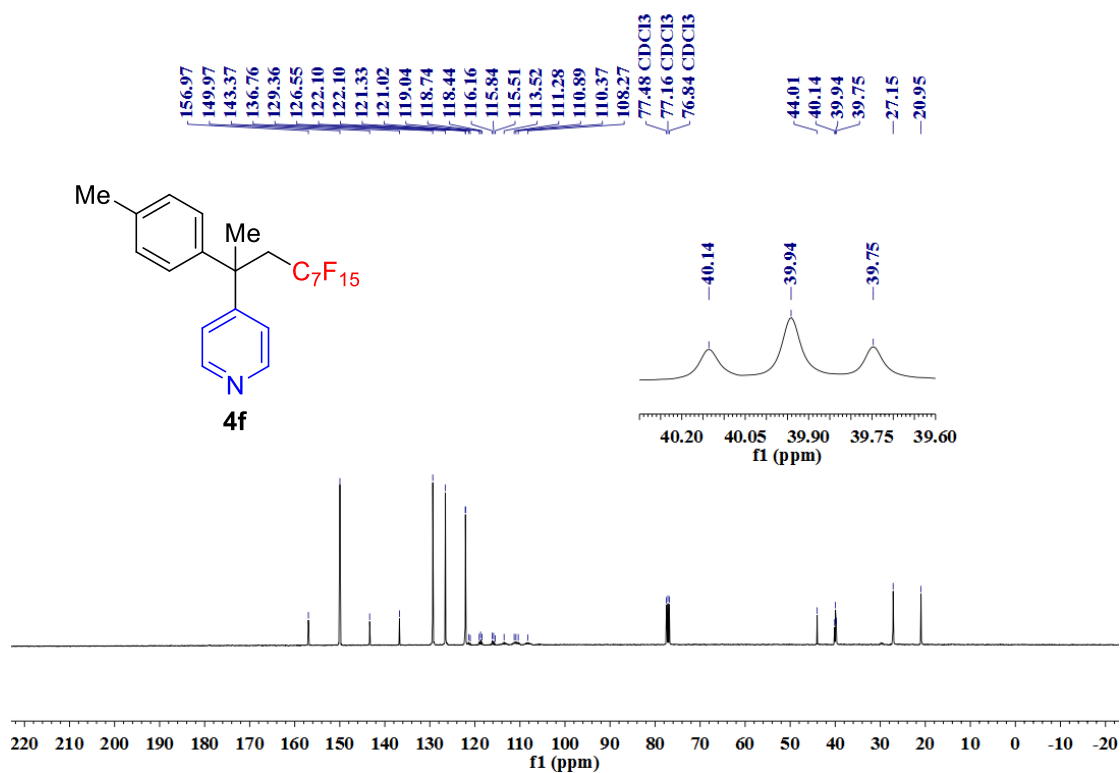

$^{19}\text{F}$  NMR (376 MHz,  $\text{CDCl}_3$ ):

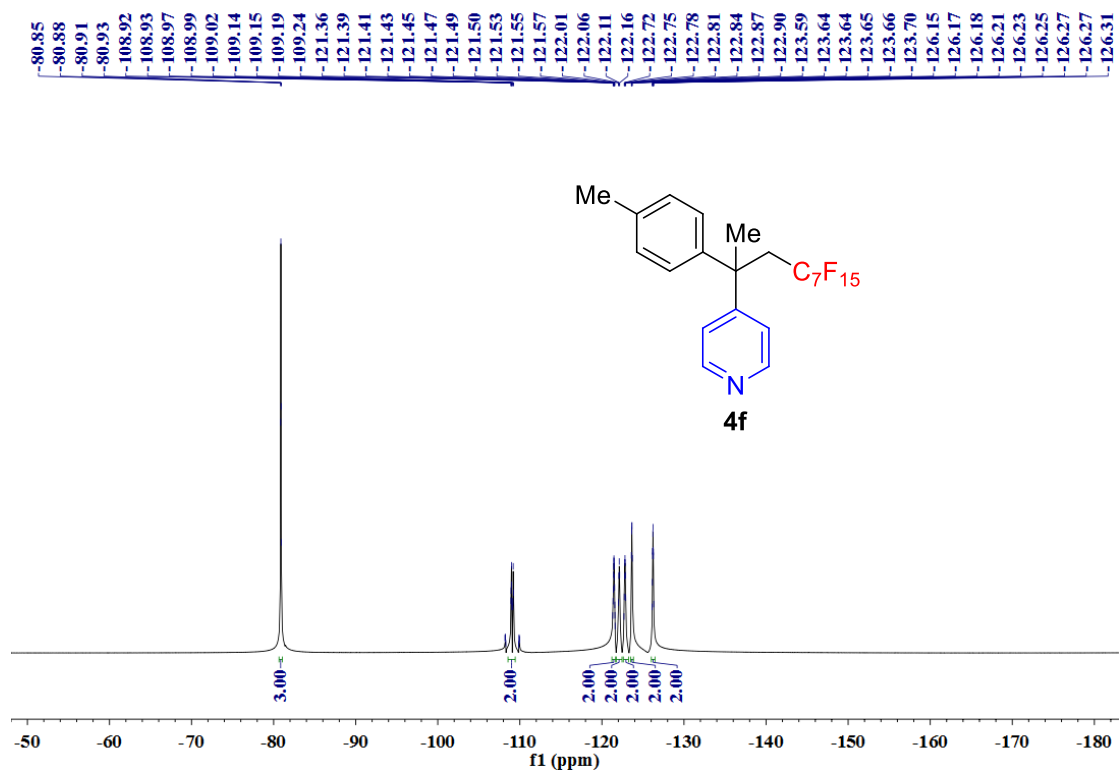

$^1\text{H}$  NMR (400 MHz,  $\text{CDCl}_3$ ):

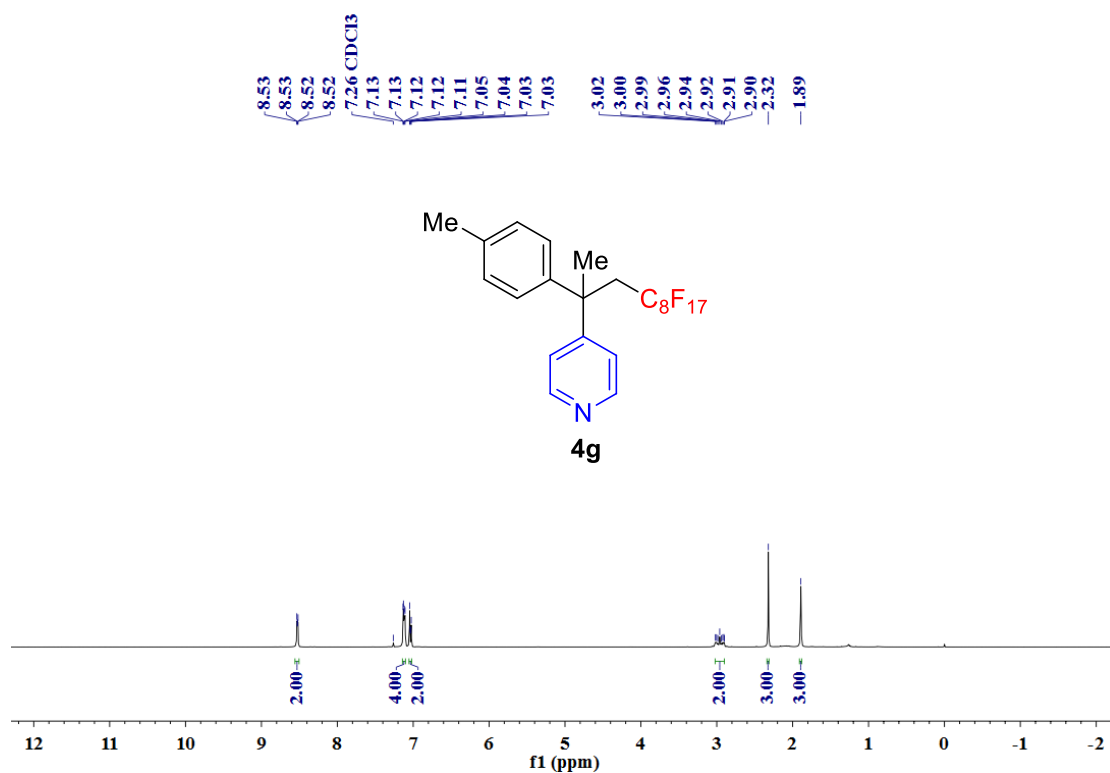

$^{13}\text{C}$  NMR (100 MHz,  $\text{CDCl}_3$ ):

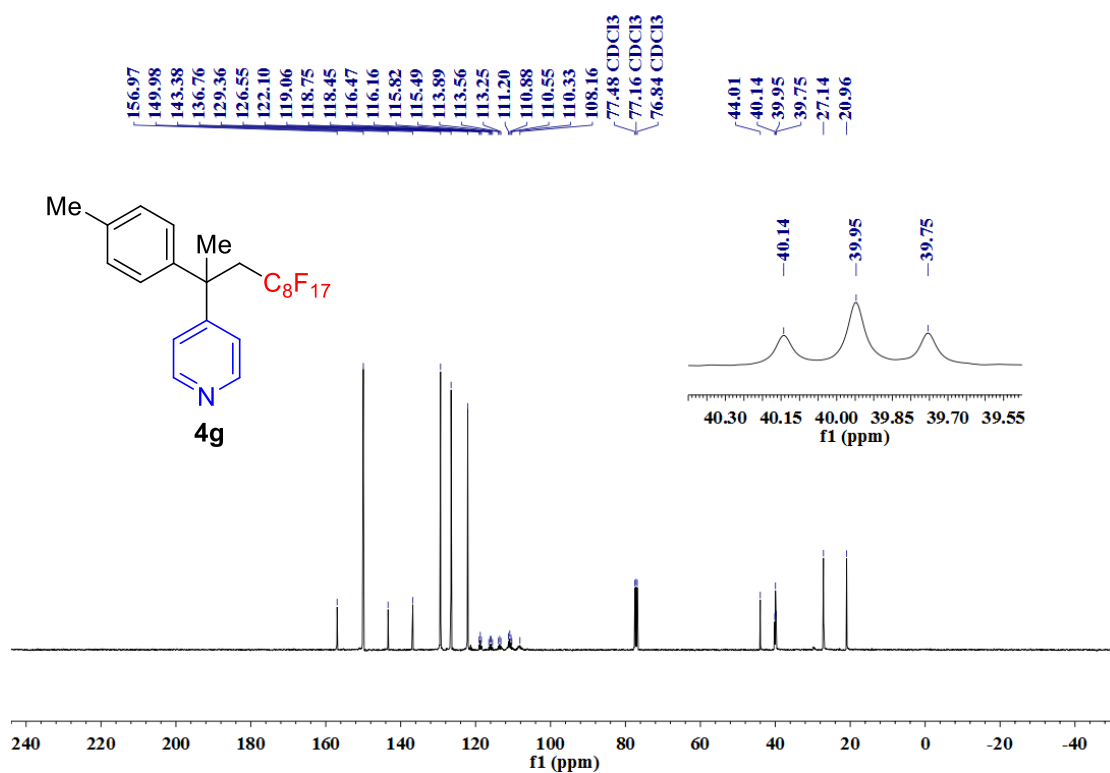



$^{19}\text{F}$  NMR (376 MHz,  $\text{CDCl}_3$ ):

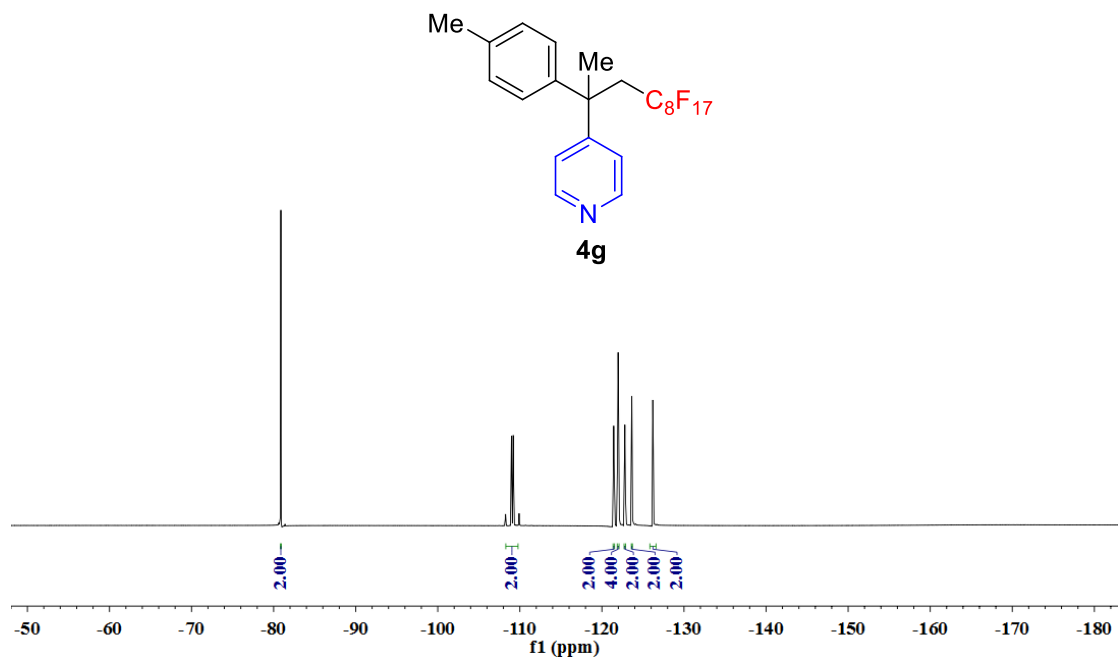

$^1\text{H}$  NMR (400 MHz,  $\text{CDCl}_3$ ):

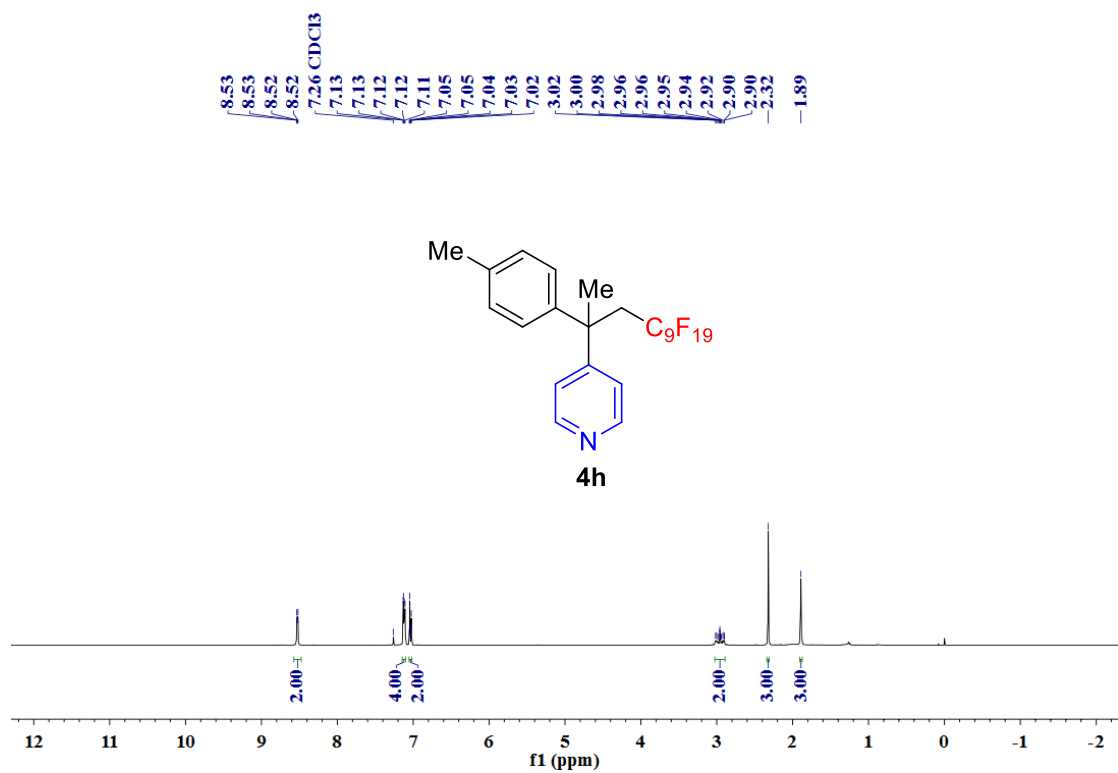

$^{13}\text{C}$  NMR (100 MHz,  $\text{CDCl}_3$ ):

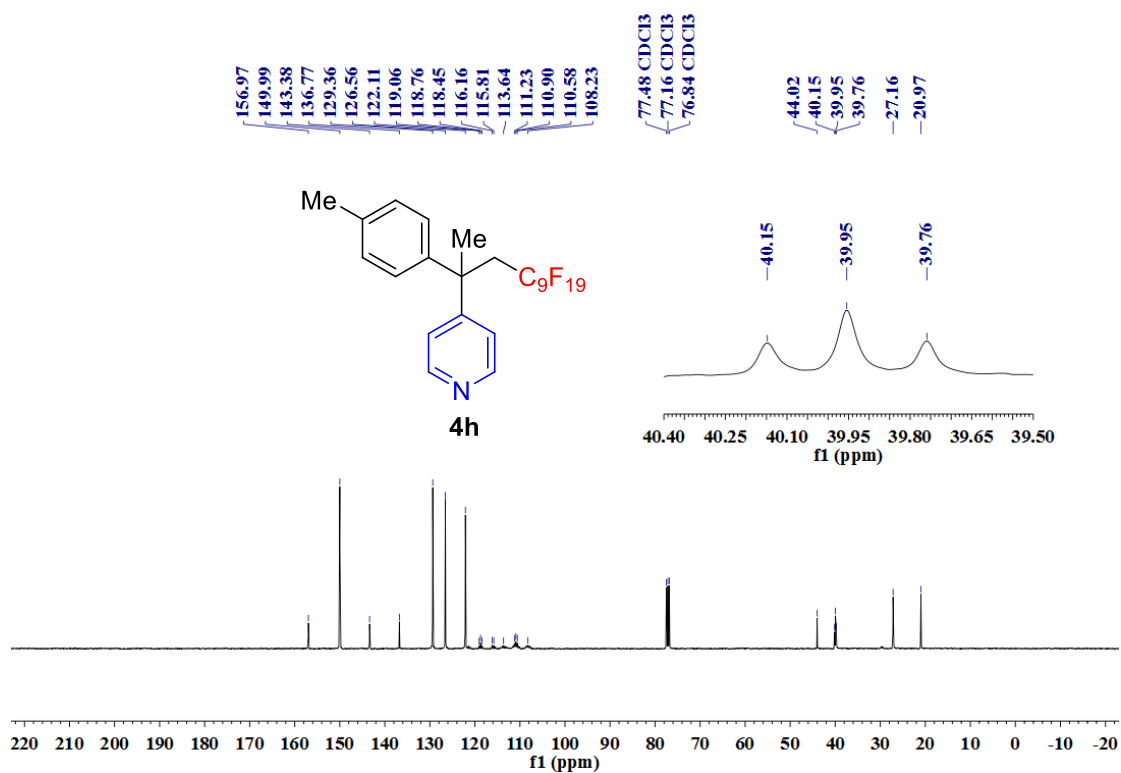

$^{19}\text{F}$  NMR (376 MHz,  $\text{CDCl}_3$ ):

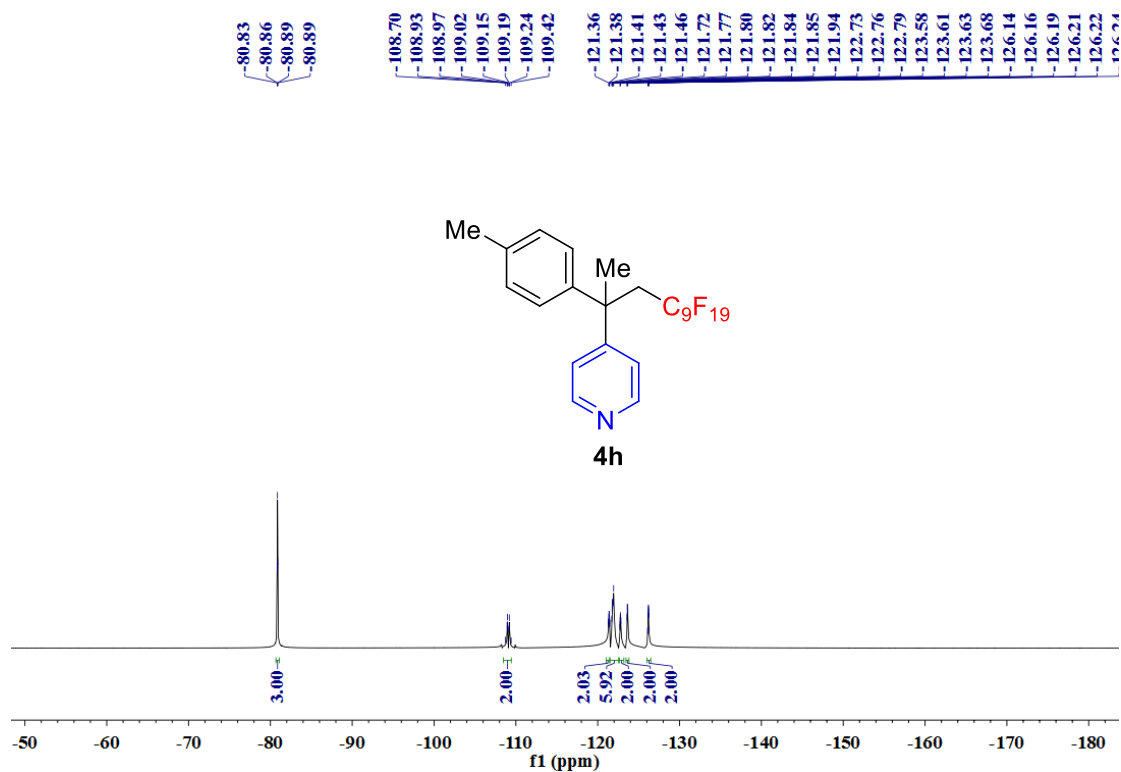

$^1\text{H}$  NMR (400 MHz,  $\text{CDCl}_3$ ):

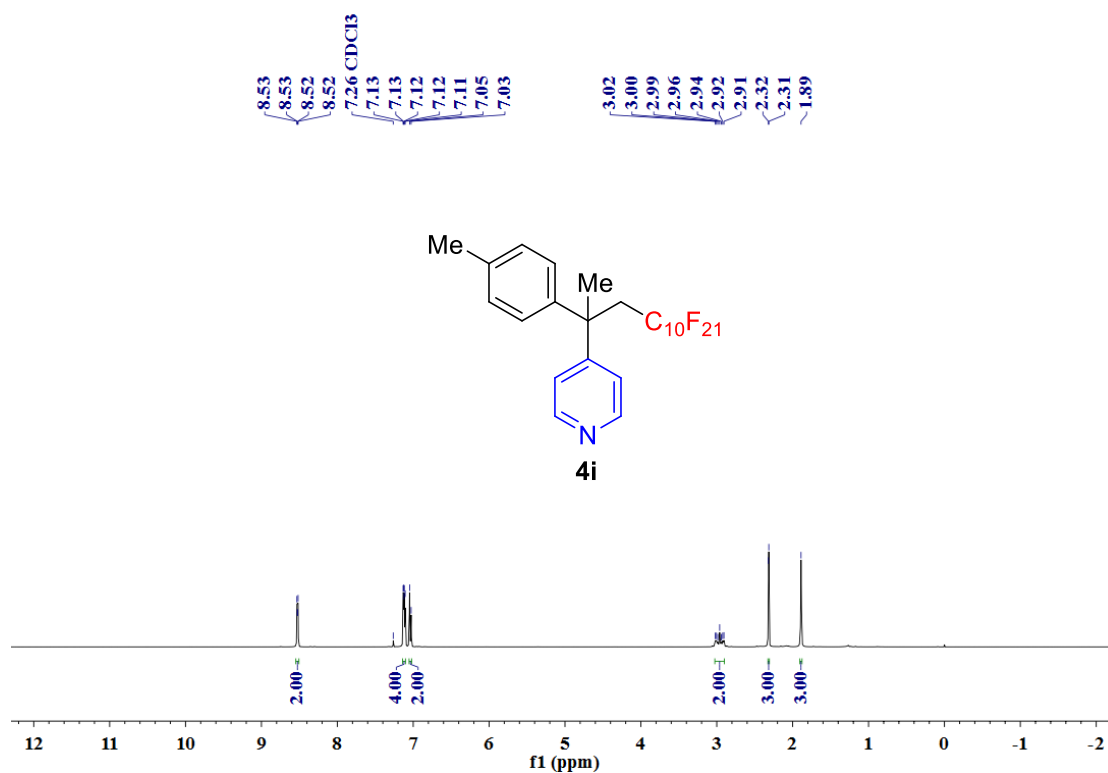

$^{13}\text{C}$  NMR (100 MHz,  $\text{CDCl}_3$ ):

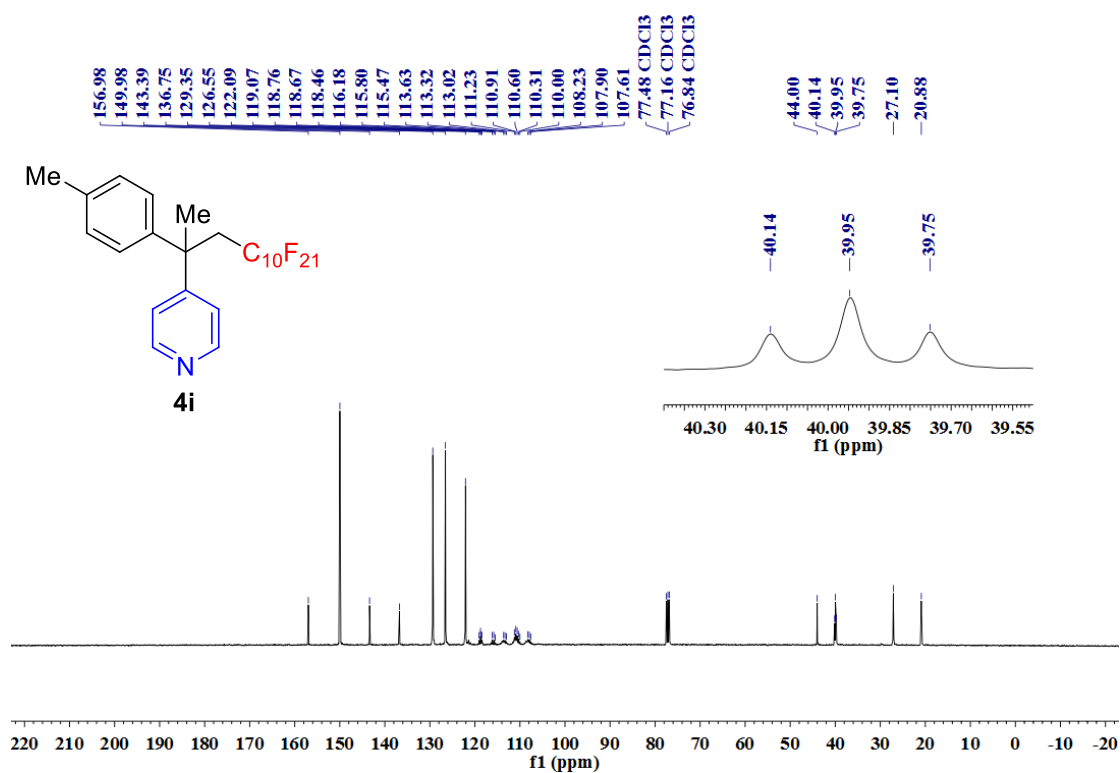

$^{19}\text{F}$  NMR (376 MHz,  $\text{CDCl}_3$ ):

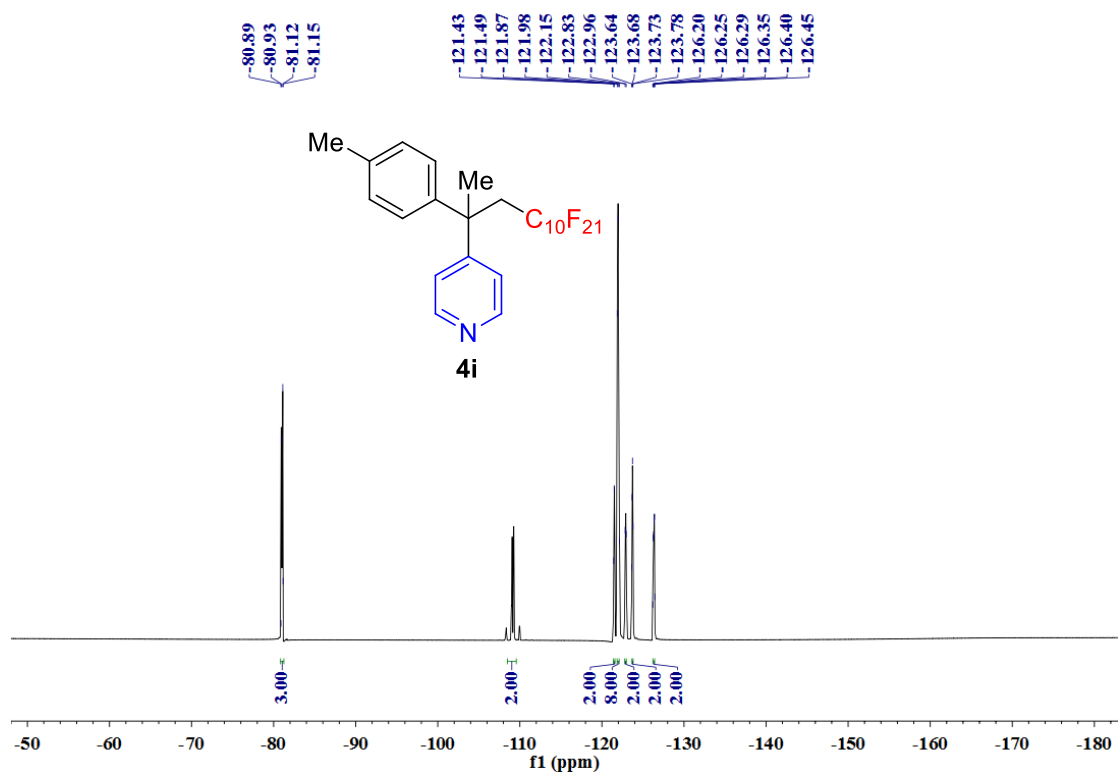

$^1\text{H}$  NMR (400 MHz,  $\text{CDCl}_3$ ):

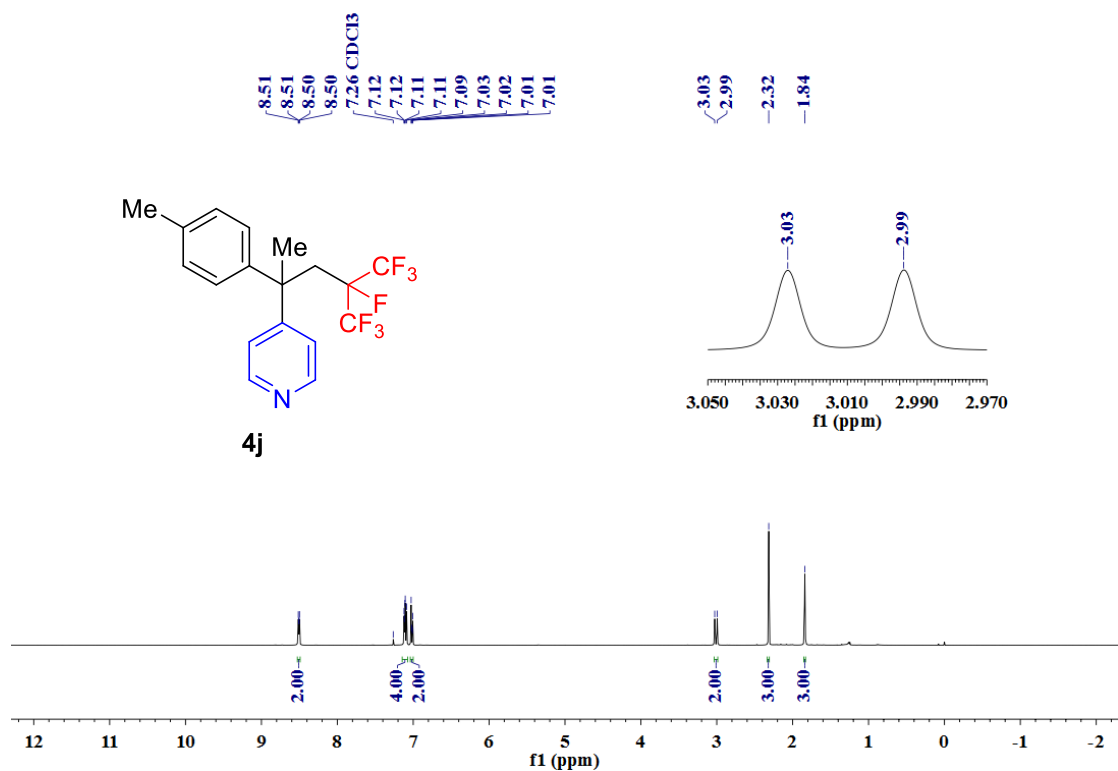

$^{13}\text{C}$  NMR (100 MHz,  $\text{CDCl}_3$ ):

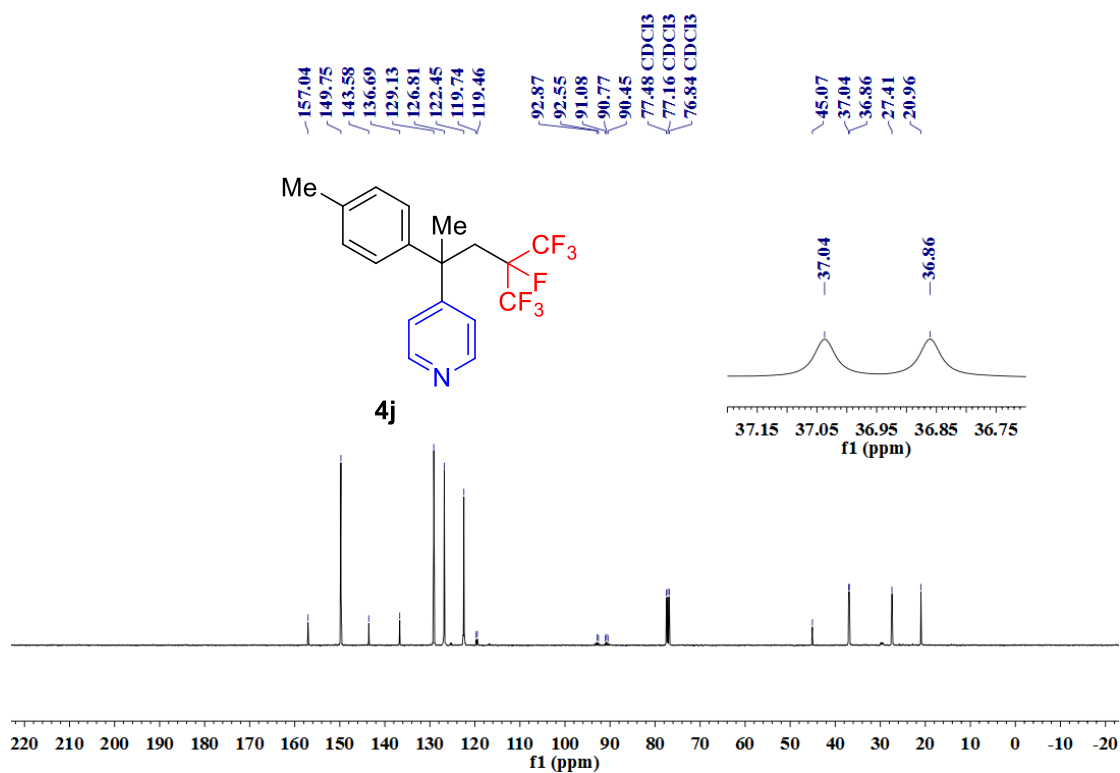

$^{19}\text{F}$  NMR (376 MHz,  $\text{CDCl}_3$ ):

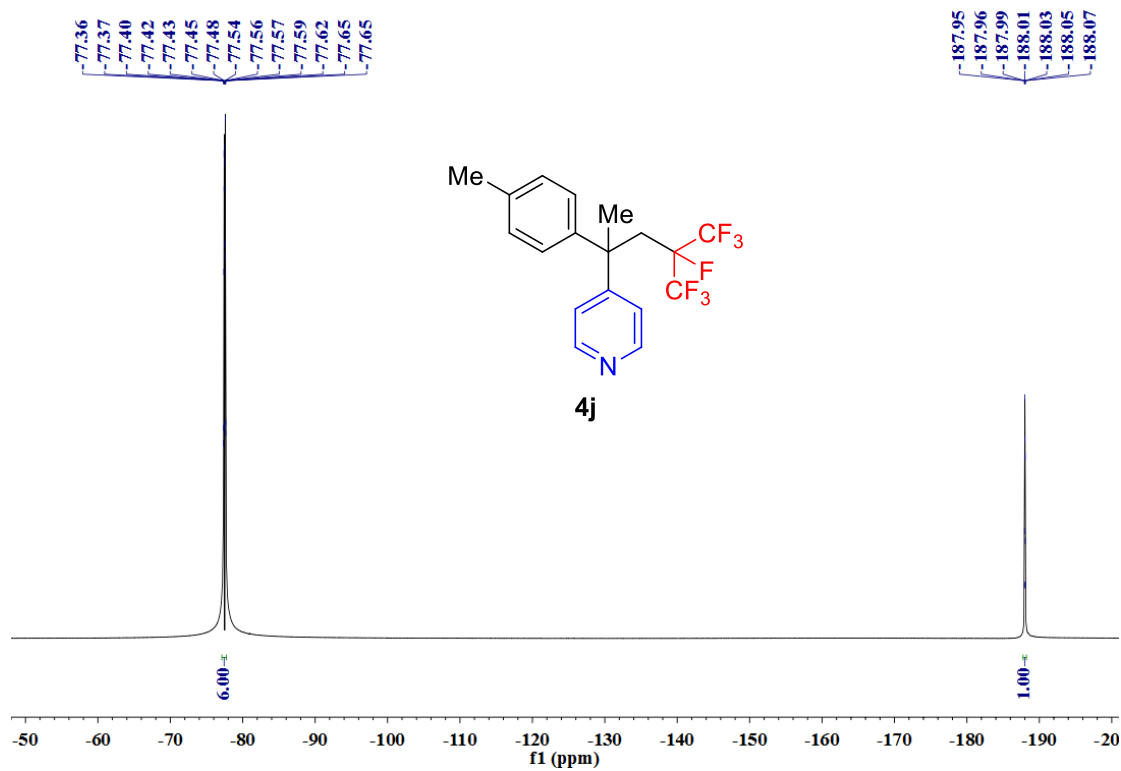

$^1\text{H}$  NMR (400 MHz,  $\text{CDCl}_3$ ):

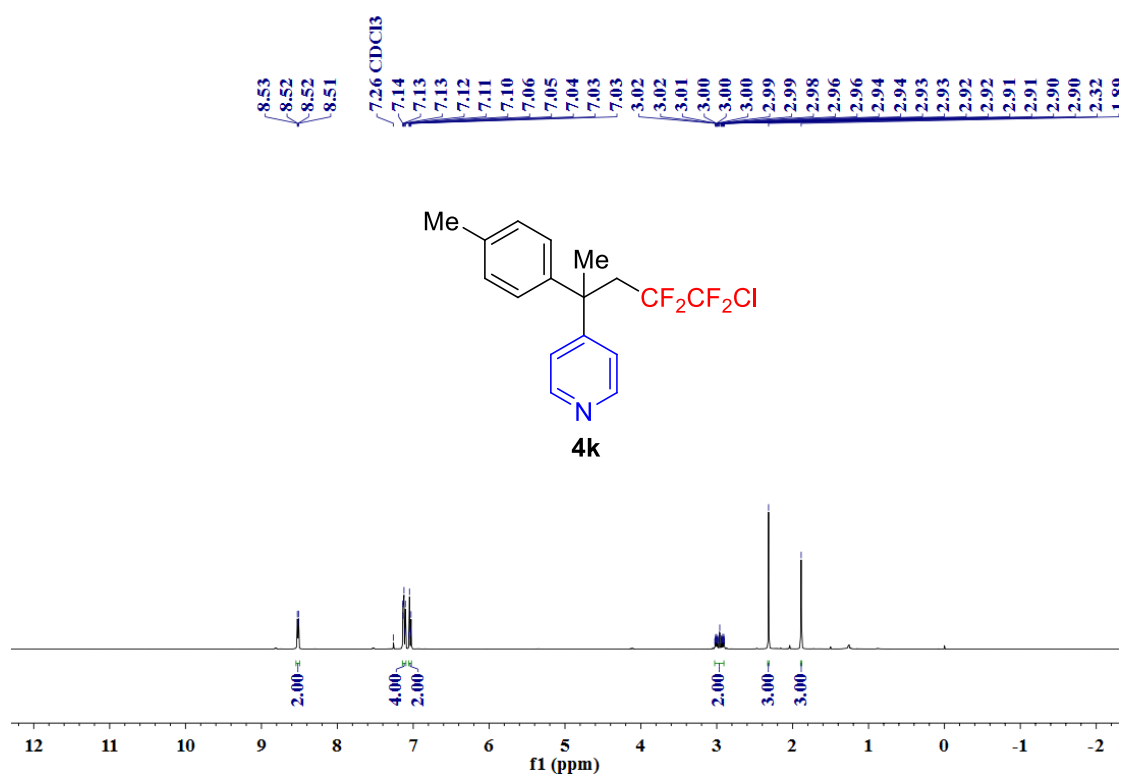

$^{13}\text{C}$  NMR (100 MHz,  $\text{CDCl}_3$ ):

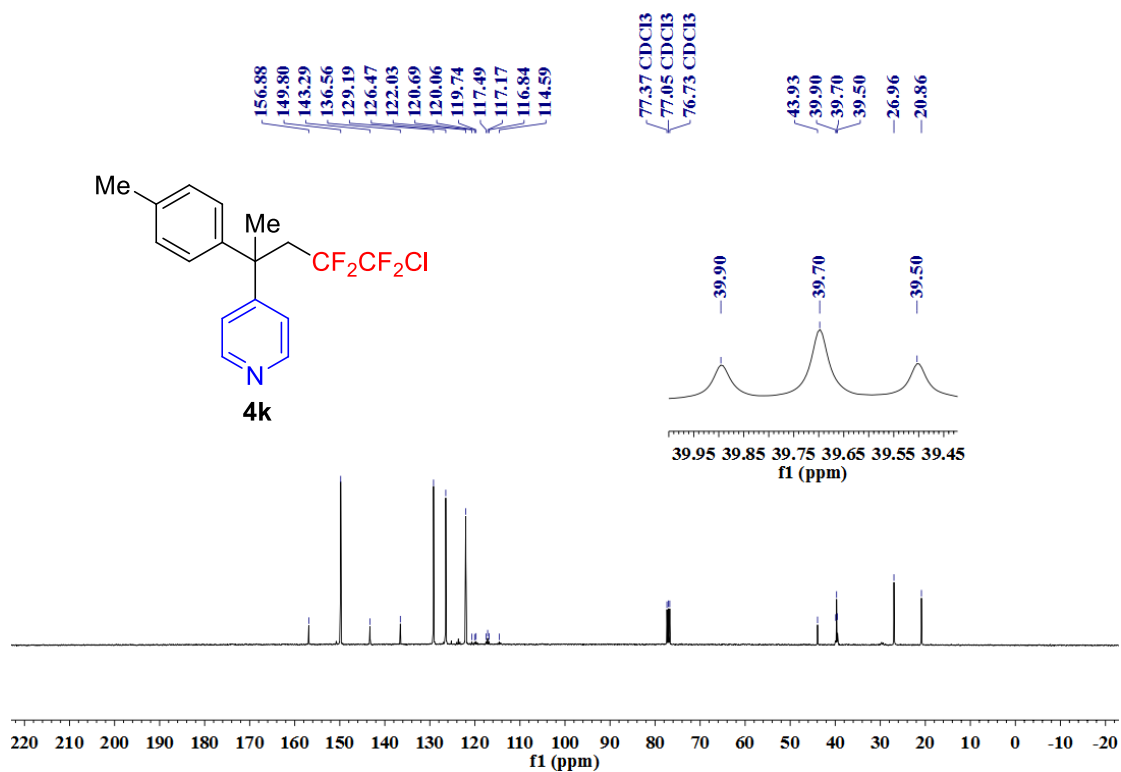

$^{19}\text{F}$  NMR (376 MHz,  $\text{CDCl}_3$ ):

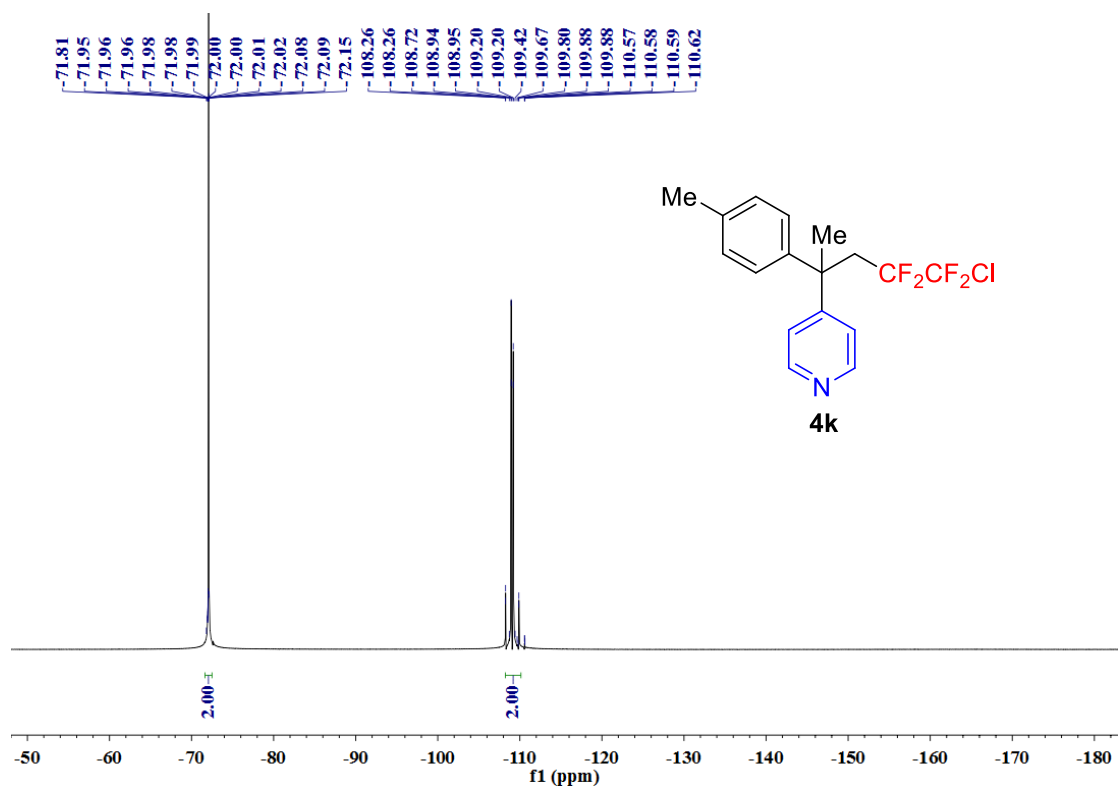

$^1\text{H}$  NMR (400 MHz,  $\text{CDCl}_3$ ):

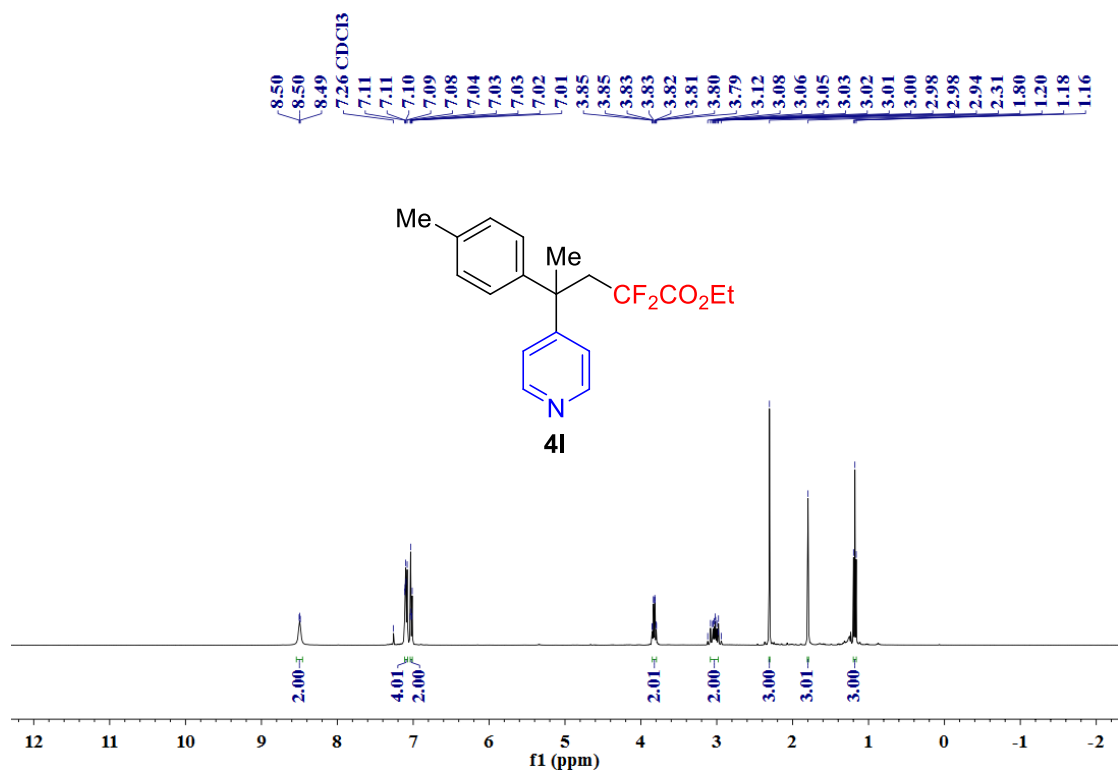

$^{13}\text{C}$  NMR (100 MHz,  $\text{CDCl}_3$ ):

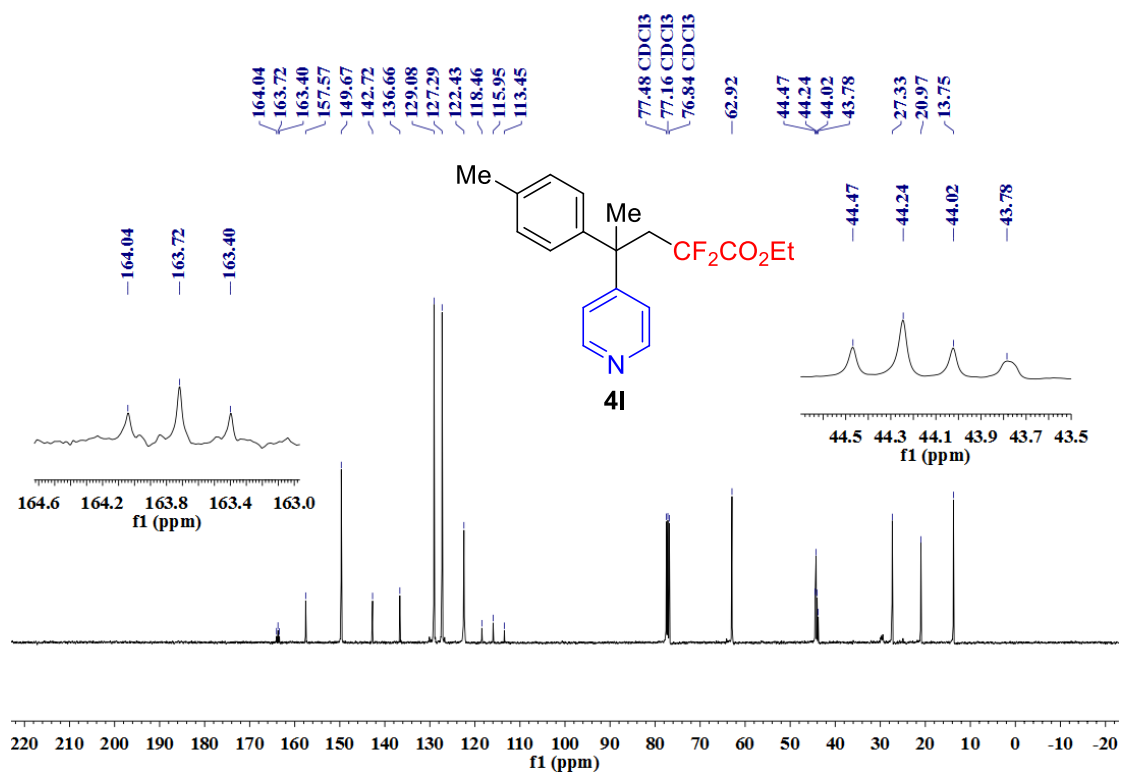

$^{19}\text{F}$  NMR (376 MHz,  $\text{CDCl}_3$ ):

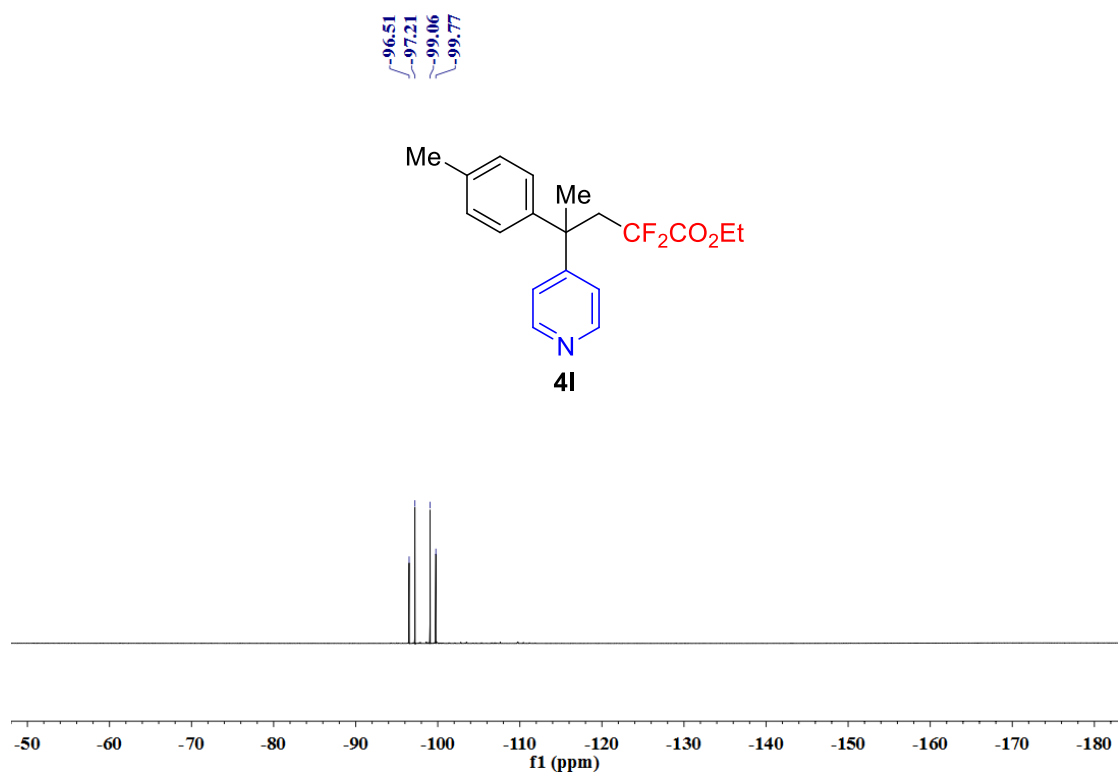



$^1\text{H}$  NMR (400 MHz,  $\text{CDCl}_3$ ):

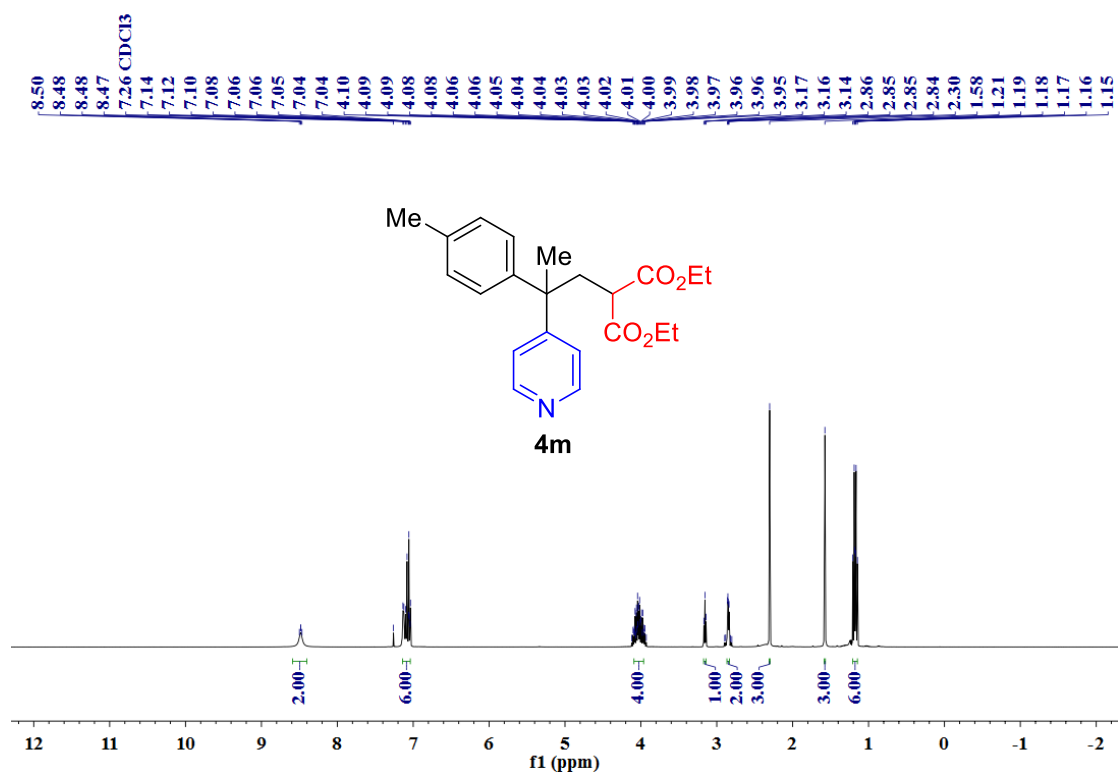

$^{13}\text{C}$  NMR (100 MHz,  $\text{CDCl}_3$ ):

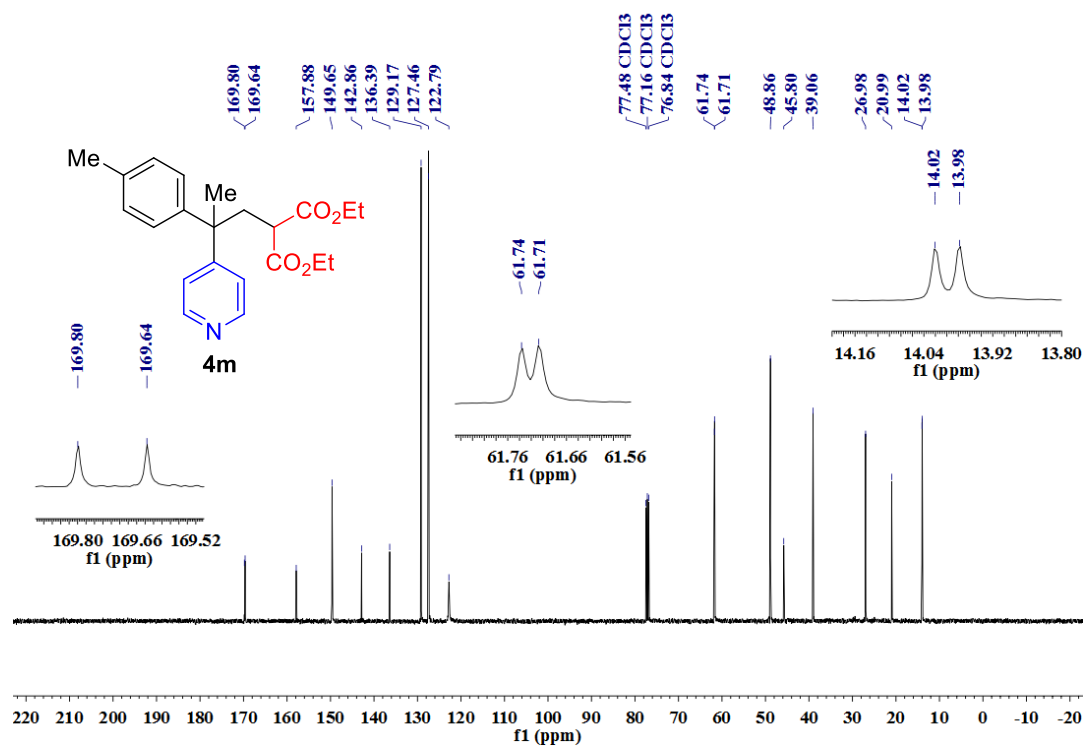

$^1\text{H}$  NMR (400 MHz,  $\text{CDCl}_3$ ):

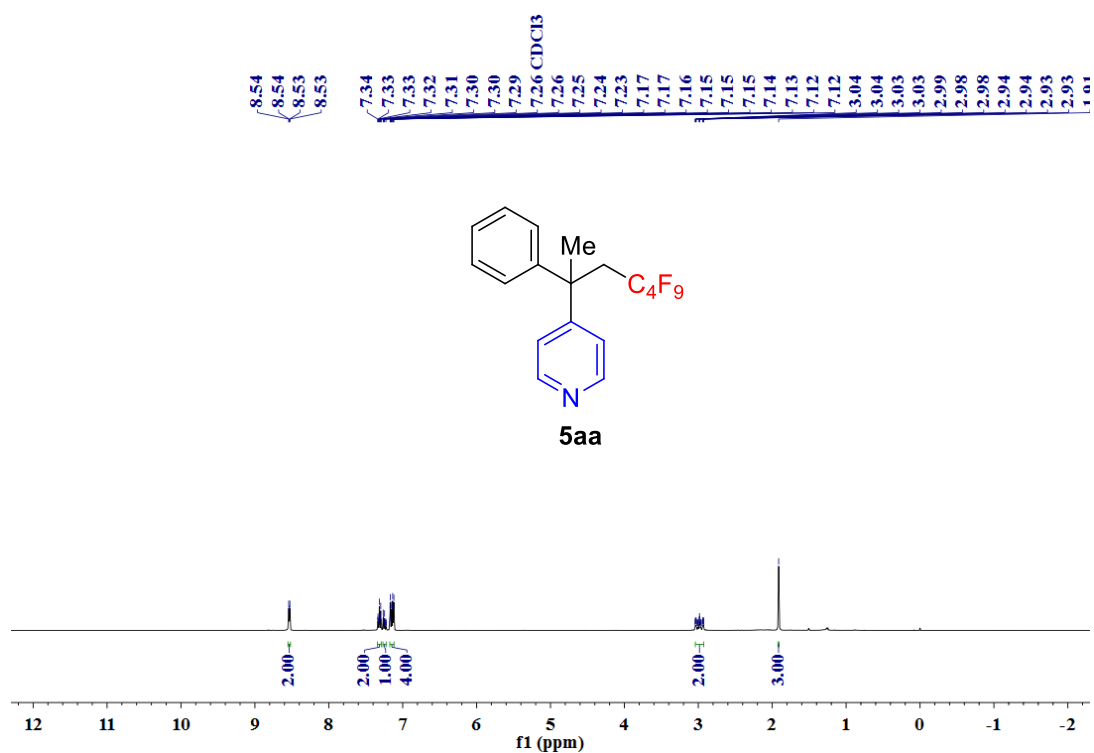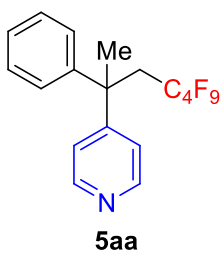

$^{13}\text{C}$  NMR (100 MHz,  $\text{CDCl}_3$ ):

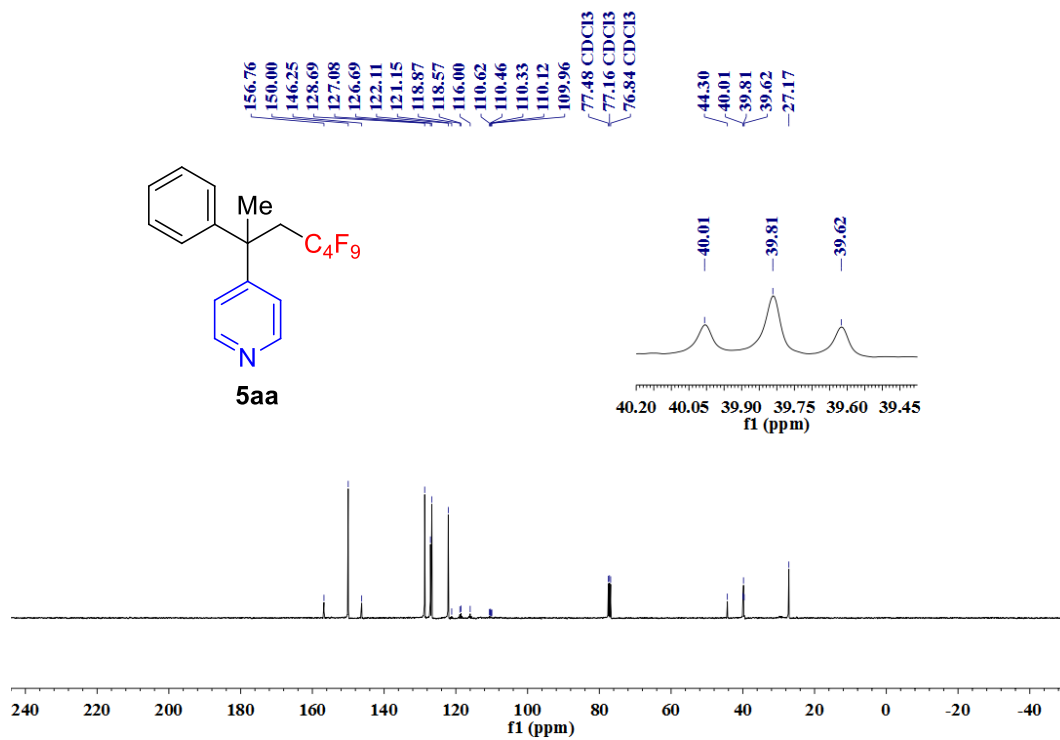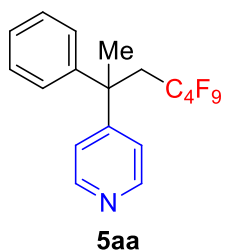

$^{19}\text{F}$  NMR (376 MHz,  $\text{CDCl}_3$ ):

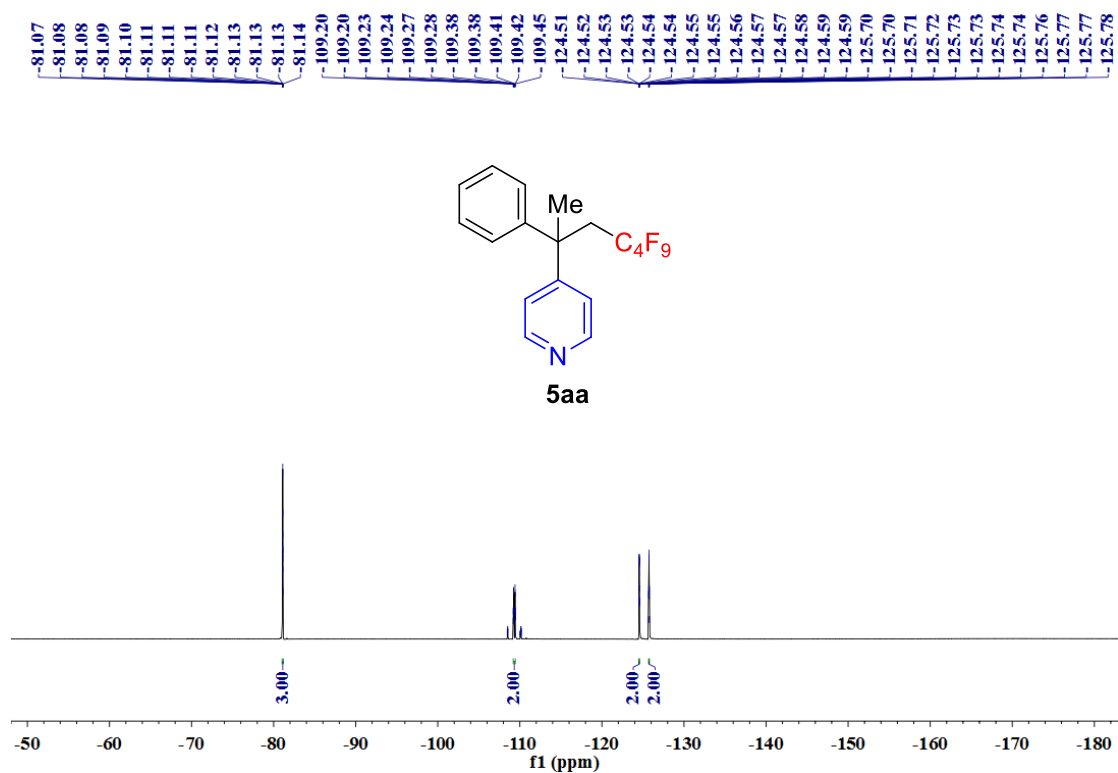

$^1\text{H}$  NMR (400 MHz,  $\text{CDCl}_3$ ):

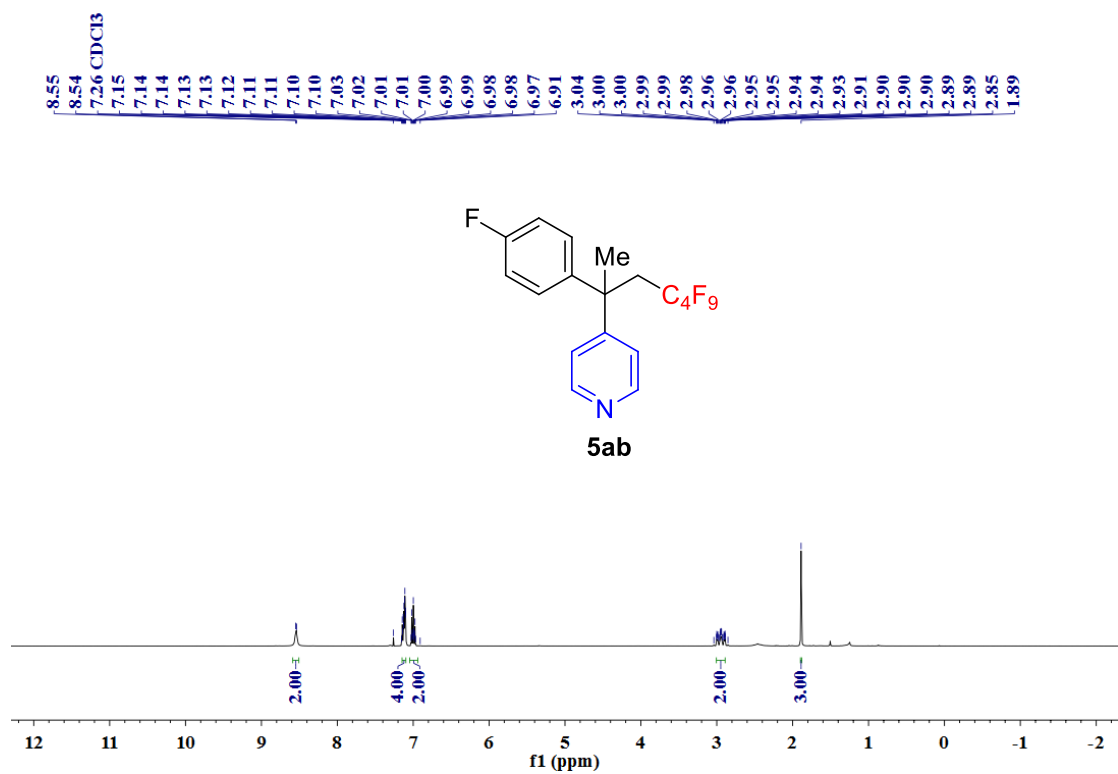

$^{13}\text{C}$  NMR (100 MHz,  $\text{CDCl}_3$ ):

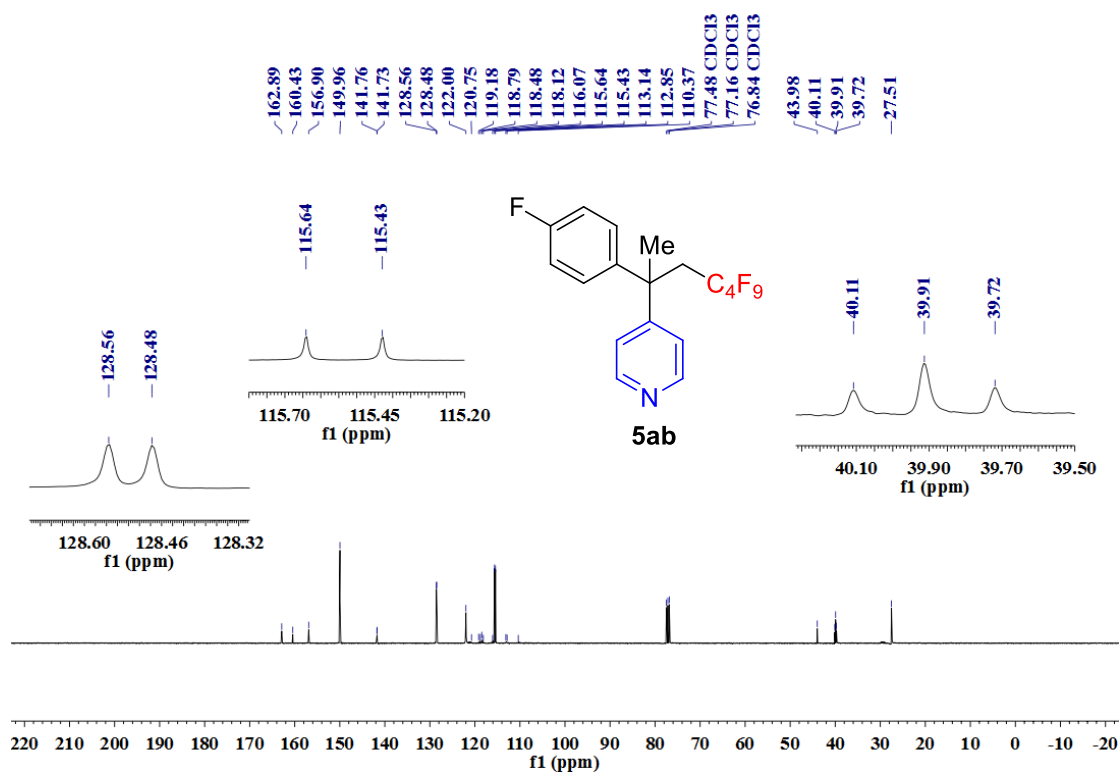

$^{19}\text{F}$  NMR (376 MHz,  $\text{CDCl}_3$ ):

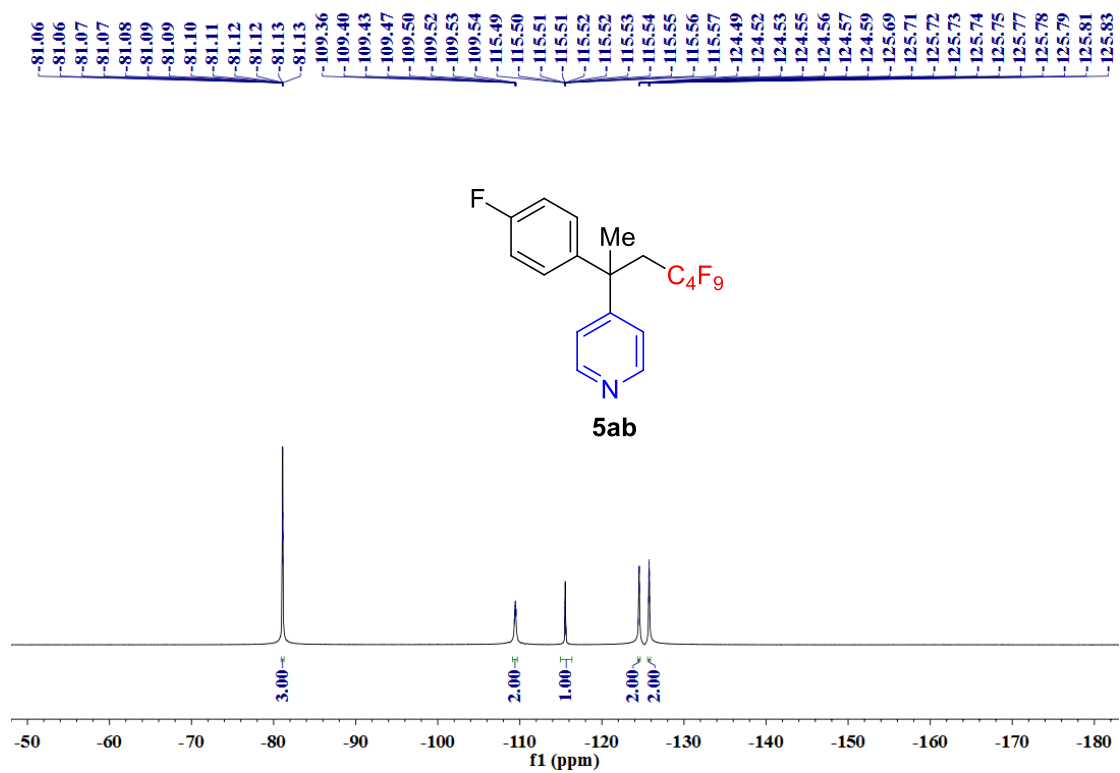

$^1\text{H}$  NMR (400 MHz,  $\text{CDCl}_3$ ):

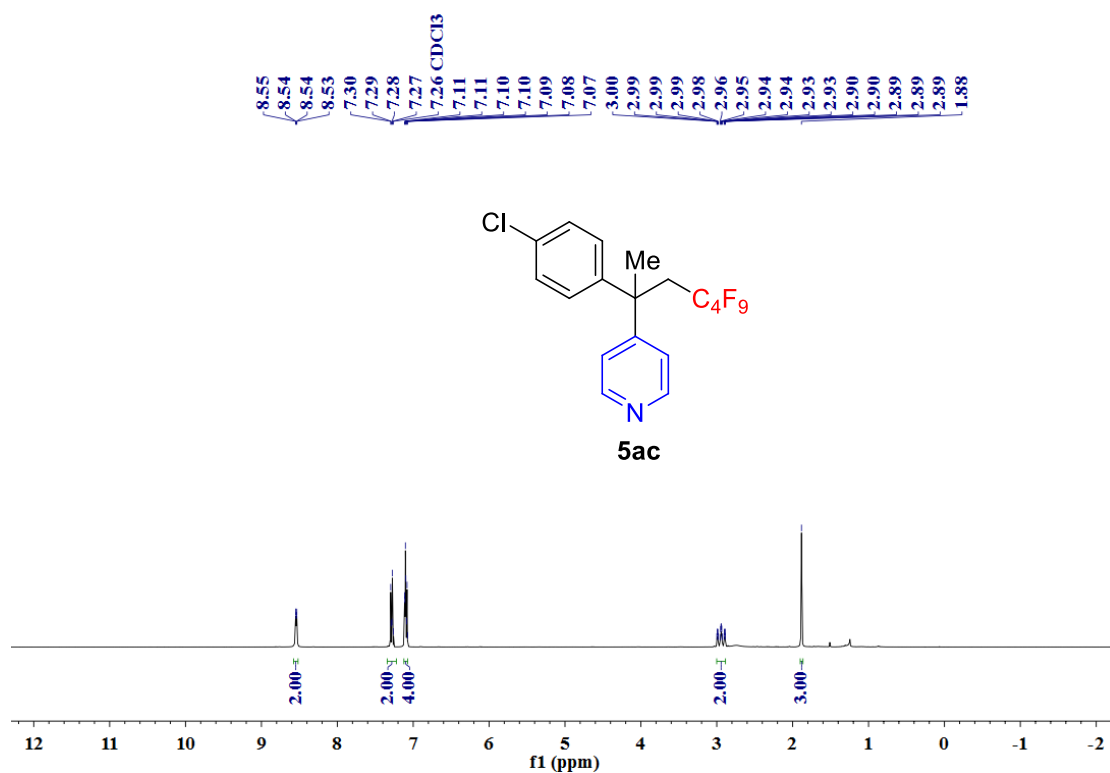

$^{13}\text{C}$  NMR (100 MHz,  $\text{CDCl}_3$ ):

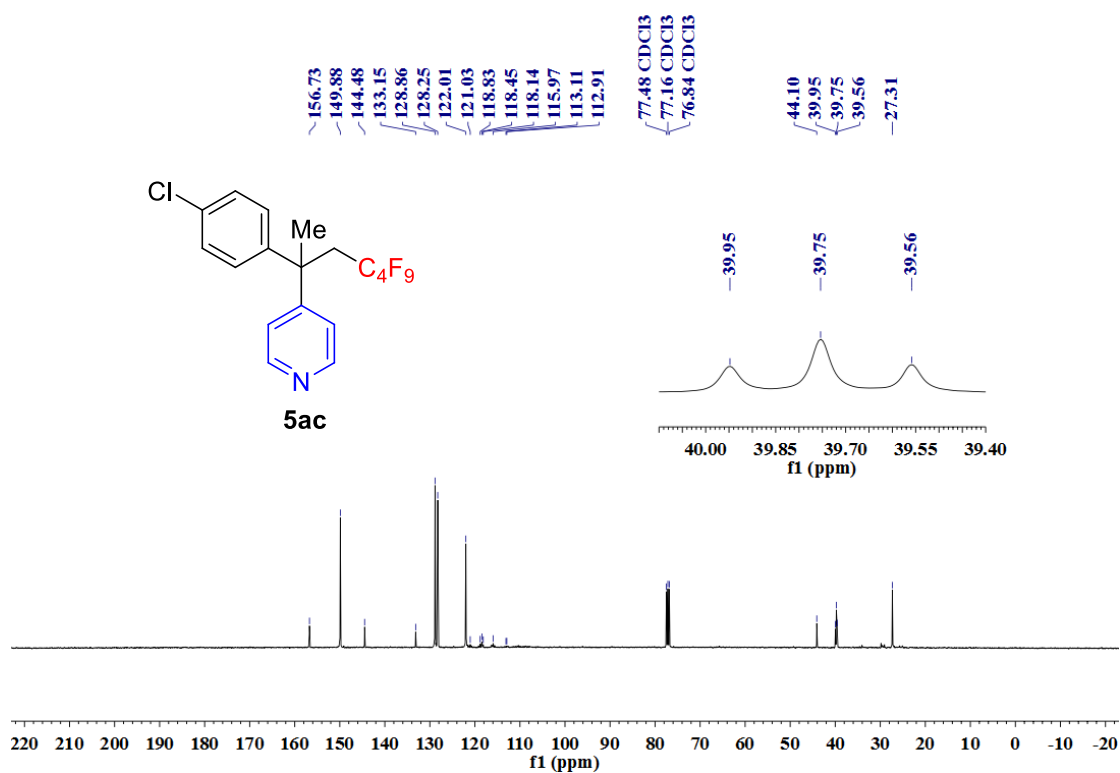

$^{19}\text{F}$  NMR (376 MHz,  $\text{CDCl}_3$ ):

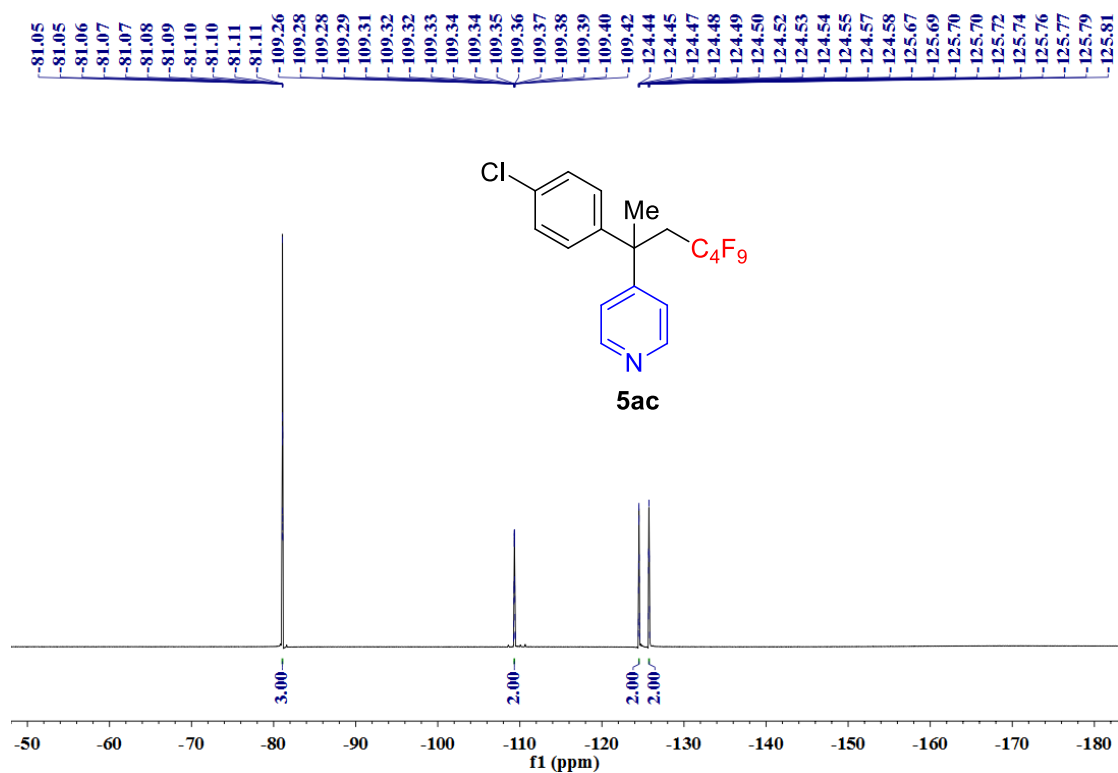

$^1\text{H}$  NMR (400 MHz,  $\text{CDCl}_3$ ):

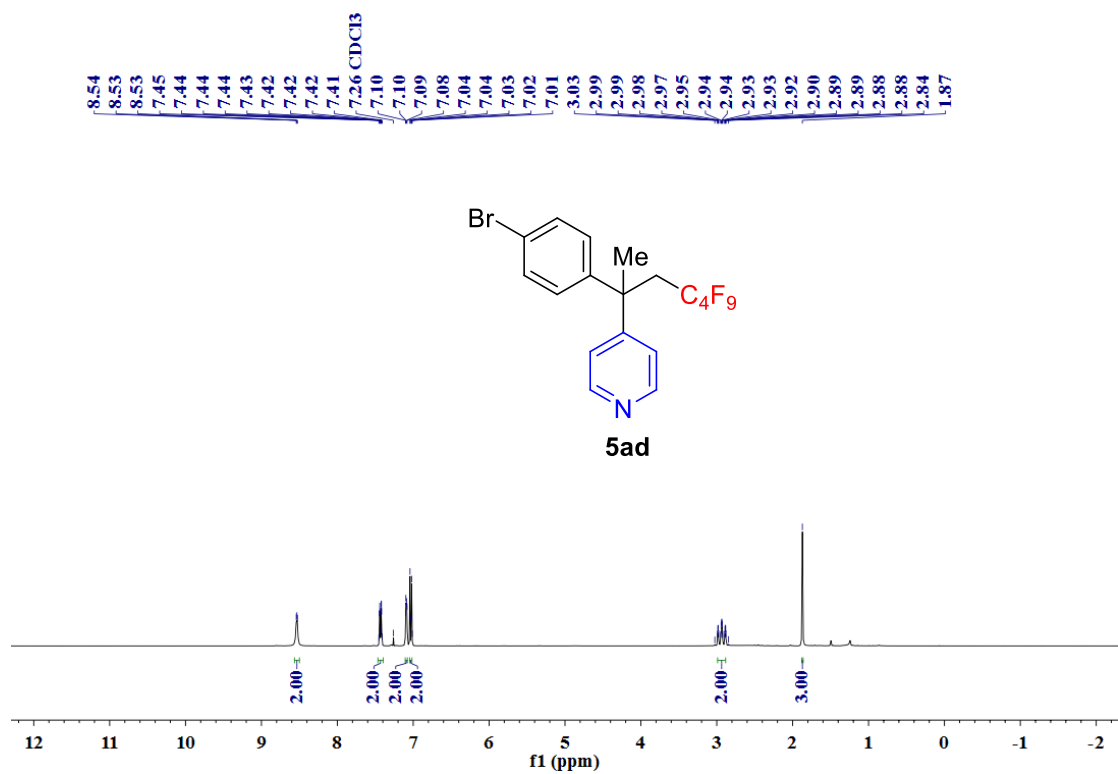

$^{13}\text{C}$  NMR (100 MHz,  $\text{CDCl}_3$ ):

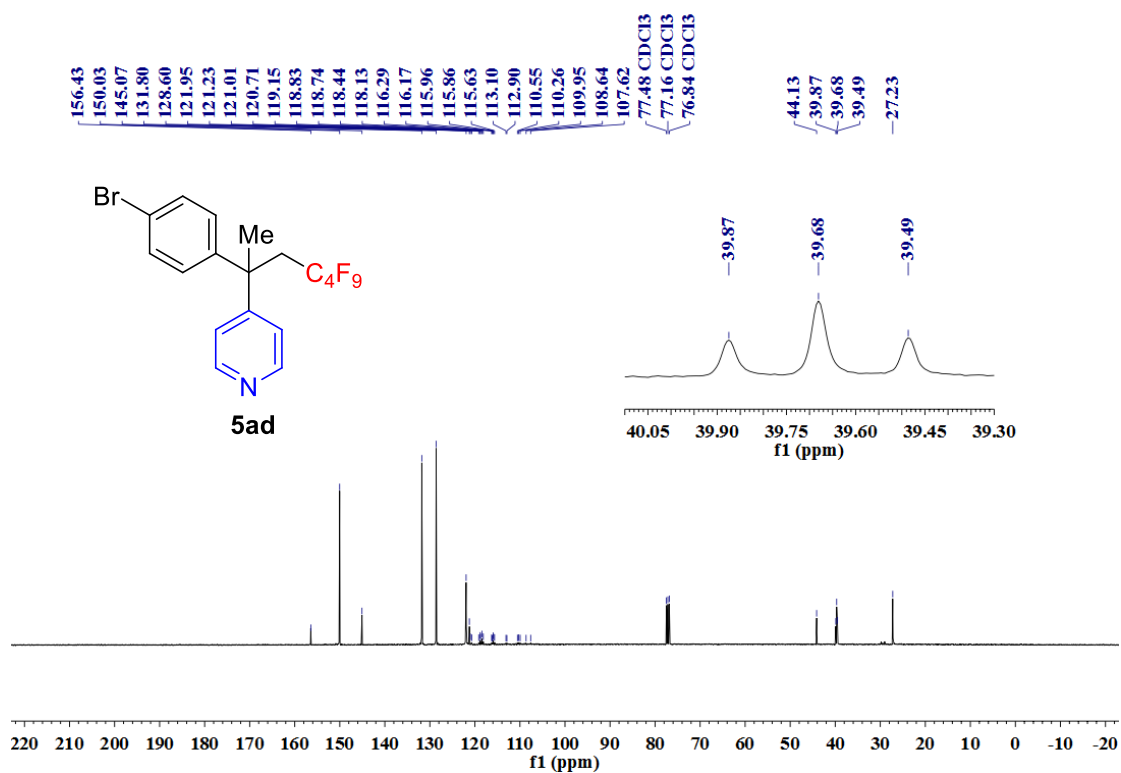

$^{19}\text{F}$  NMR (376 MHz,  $\text{CDCl}_3$ ):

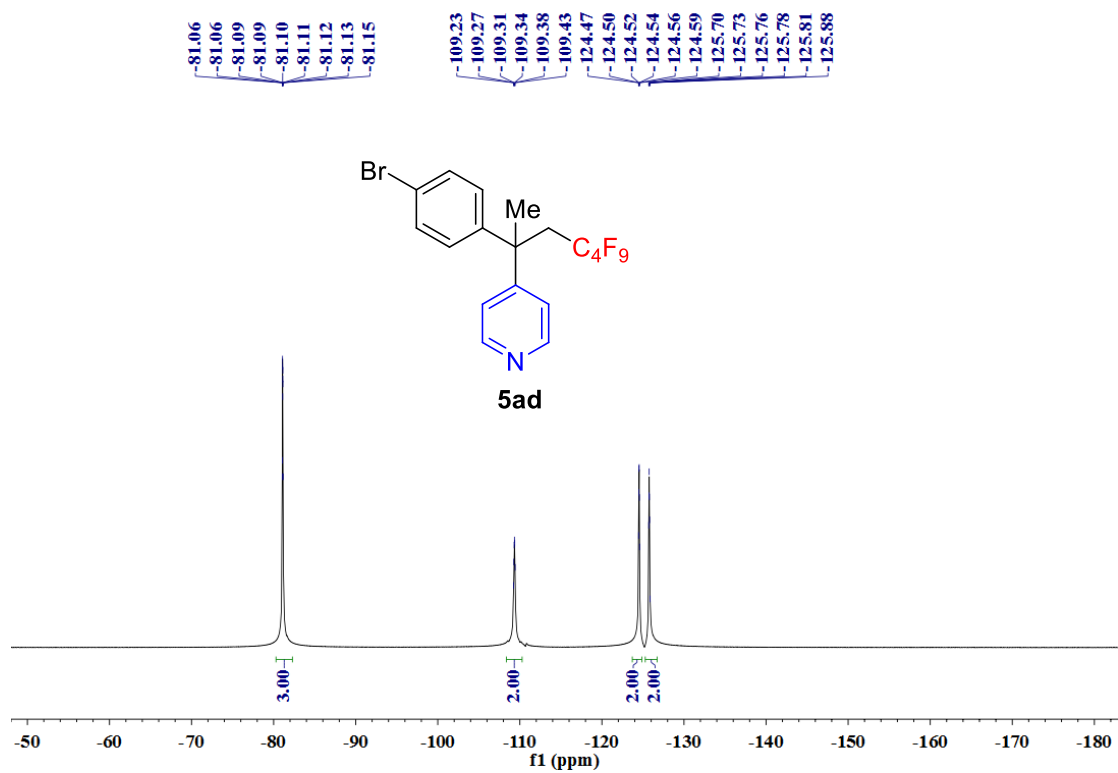

$^1\text{H}$  NMR (400 MHz,  $\text{CDCl}_3$ ):

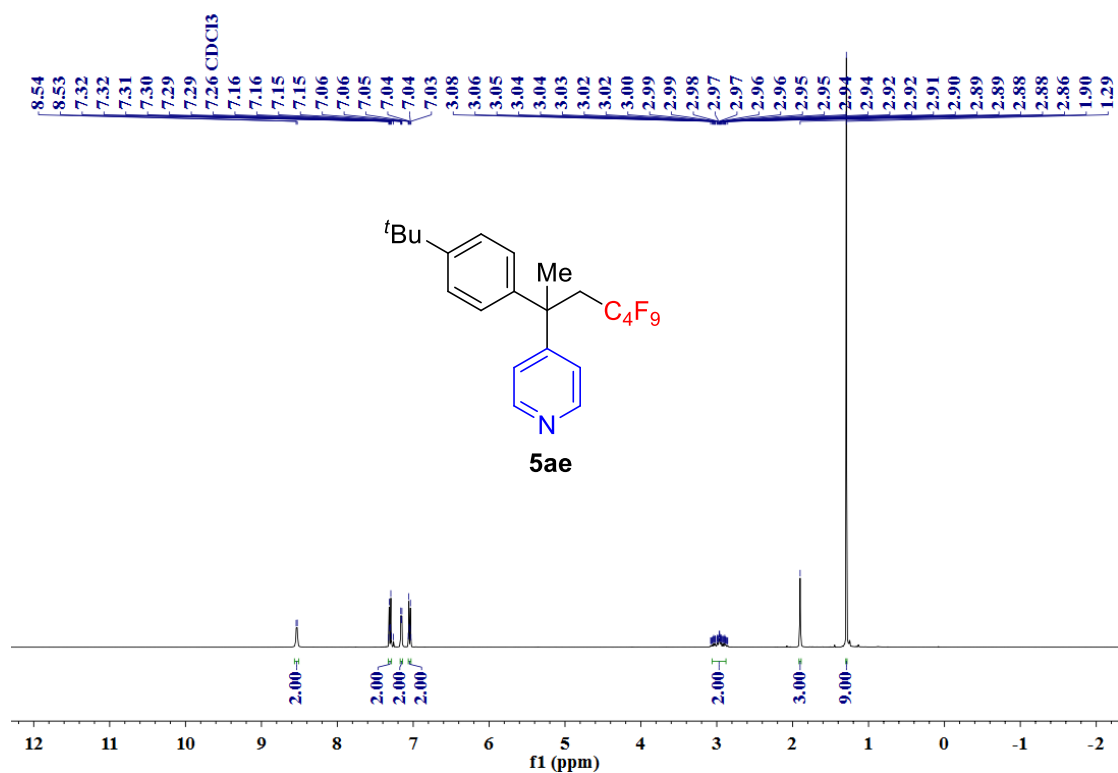

$^{13}\text{C}$  NMR (100 MHz,  $\text{CDCl}_3$ ):

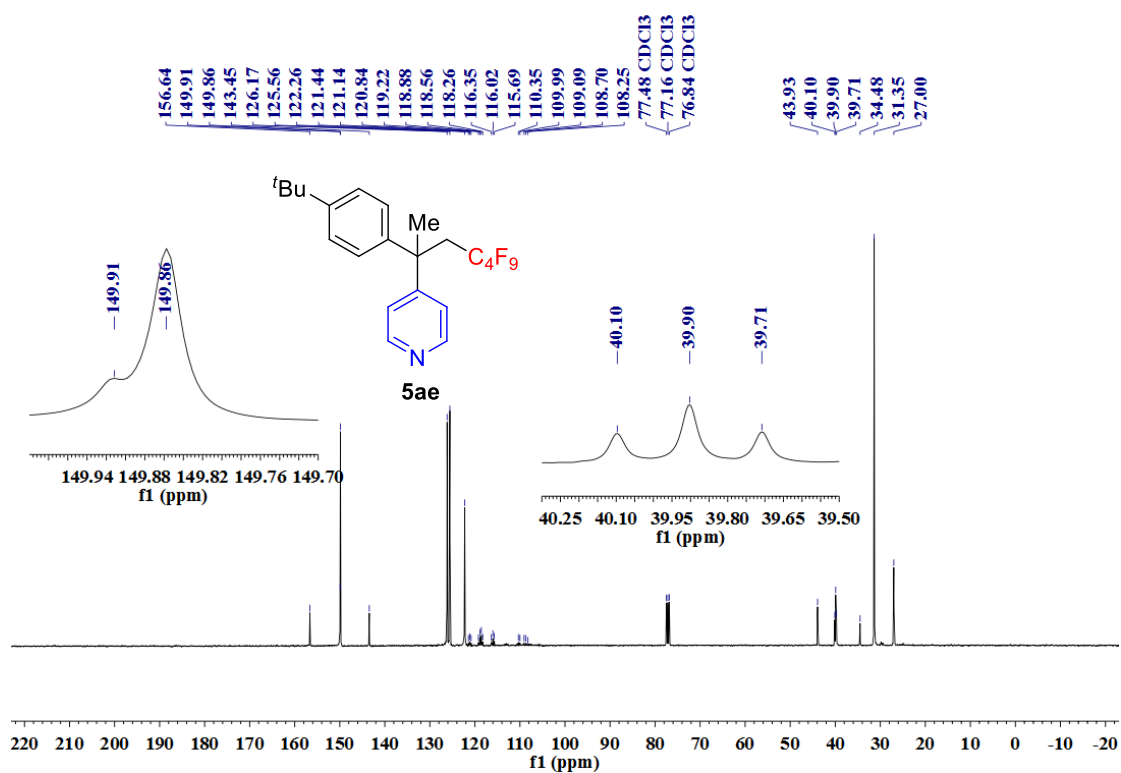



$^{19}\text{F}$  NMR (376 MHz,  $\text{CDCl}_3$ ):

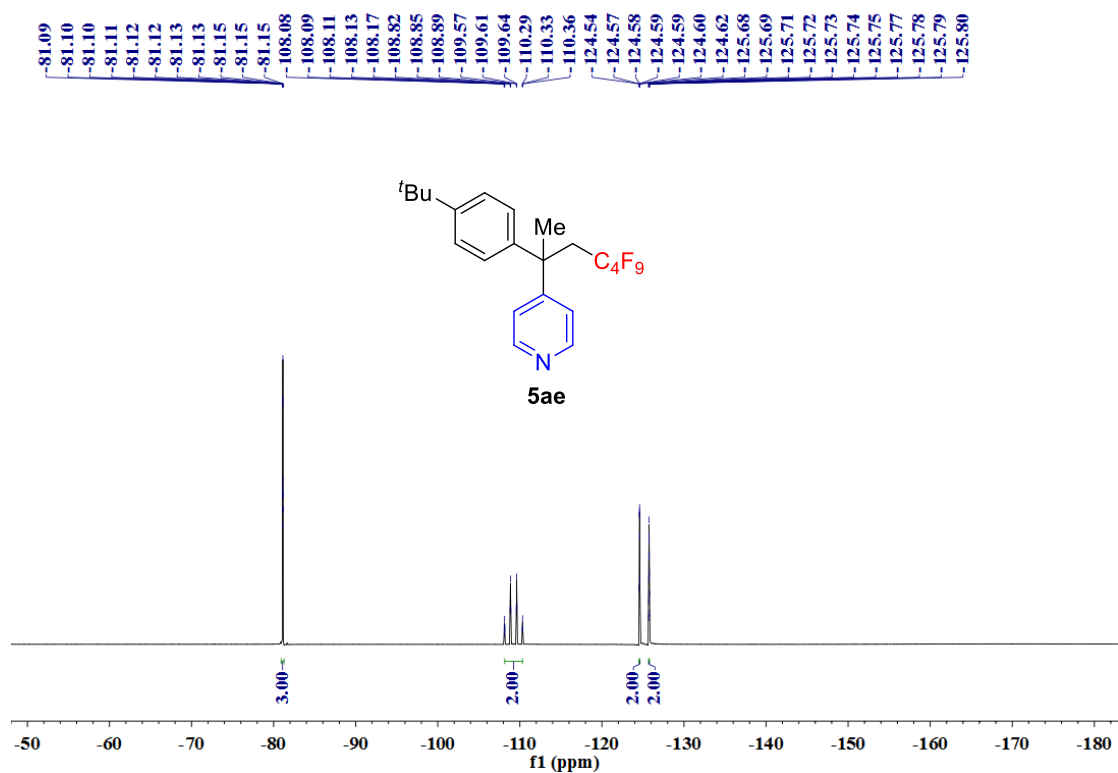

$^1\text{H}$  NMR (400 MHz,  $\text{CDCl}_3$ ):

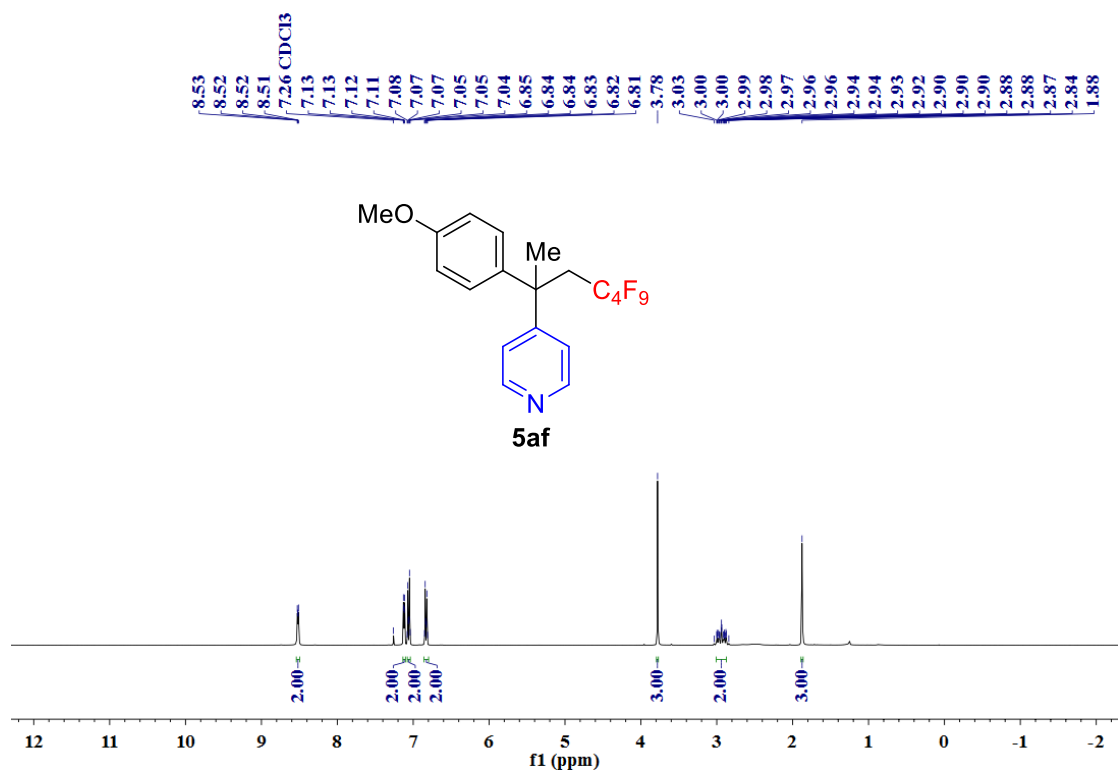

$^{13}\text{C}$  NMR (100 MHz,  $\text{CDCl}_3$ ):

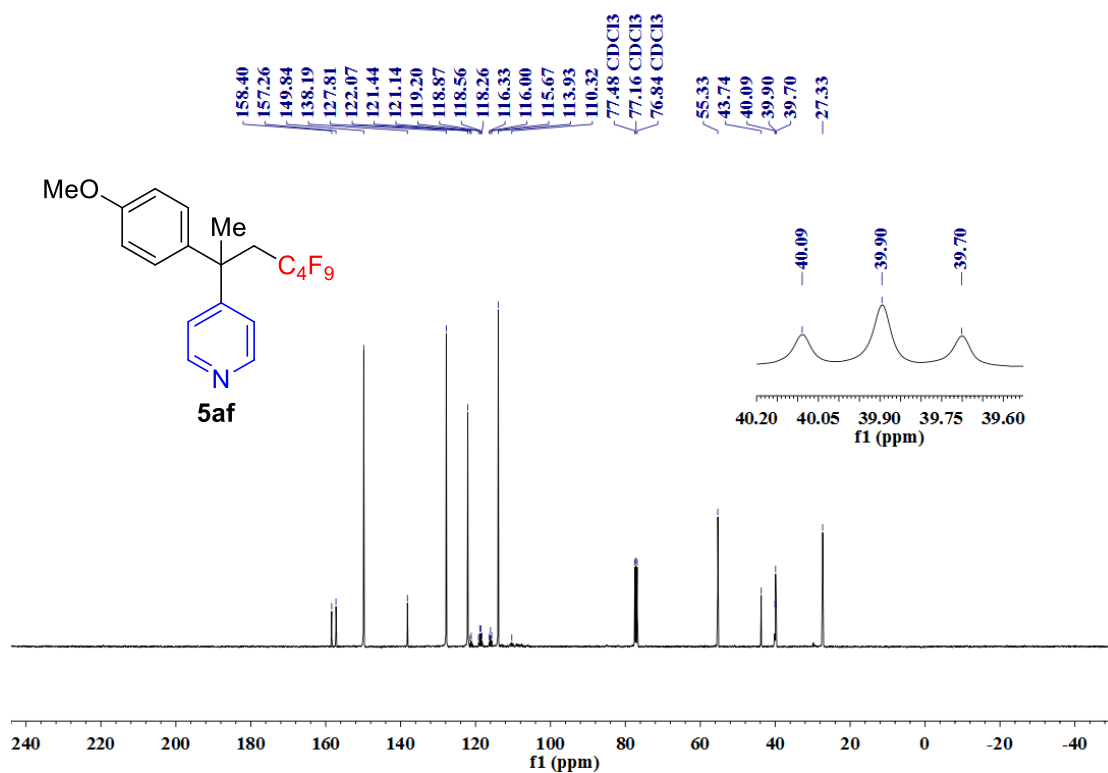

$^{19}\text{F}$  NMR (376 MHz,  $\text{CDCl}_3$ ):

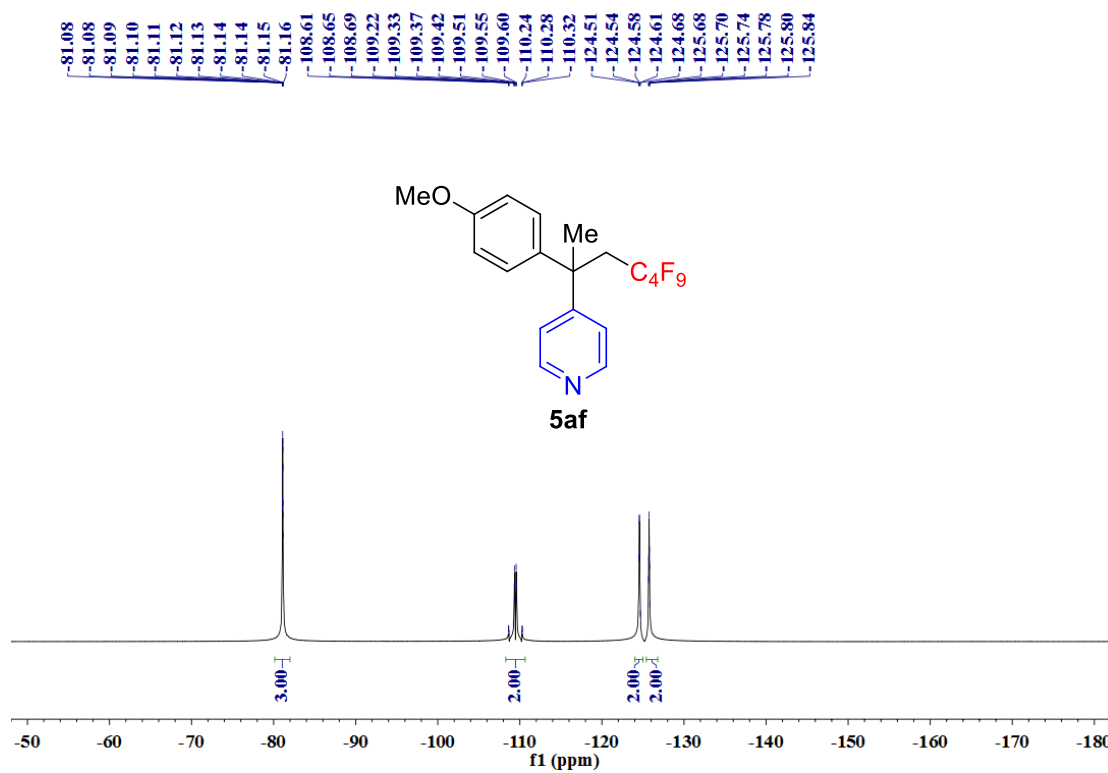

$^1\text{H}$  NMR (400 MHz,  $\text{CDCl}_3$ ):

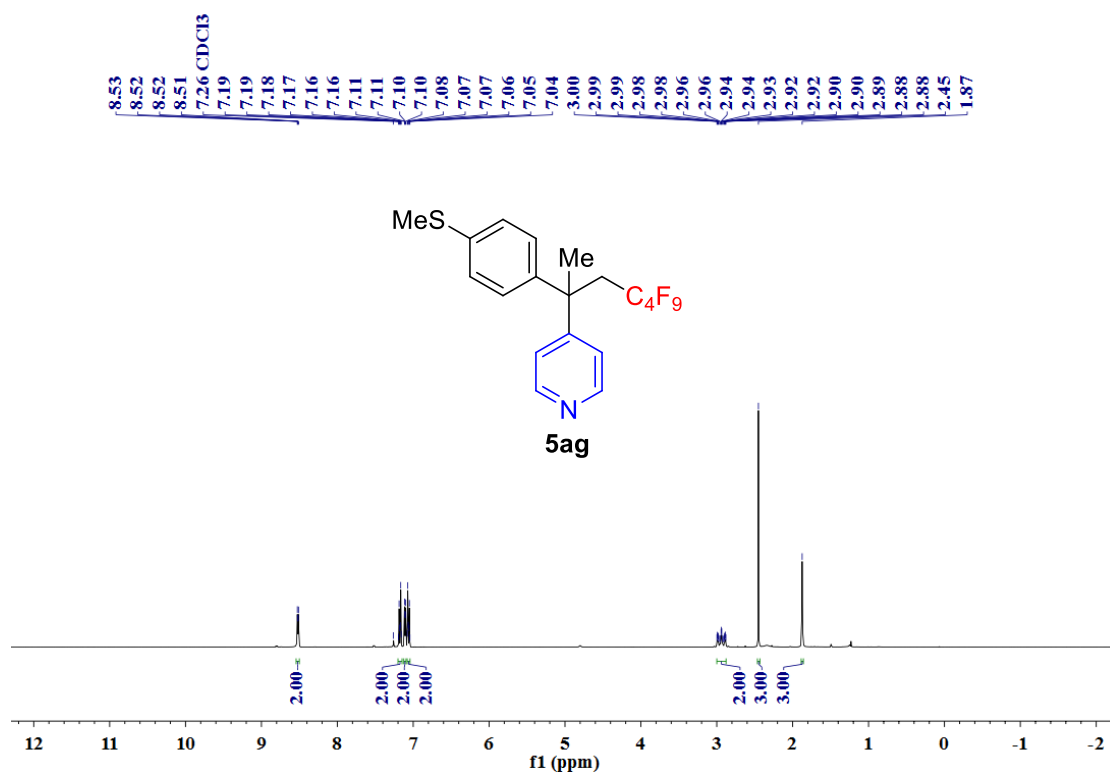

$^{13}\text{C}$  NMR (100 MHz,  $\text{CDCl}_3$ ):

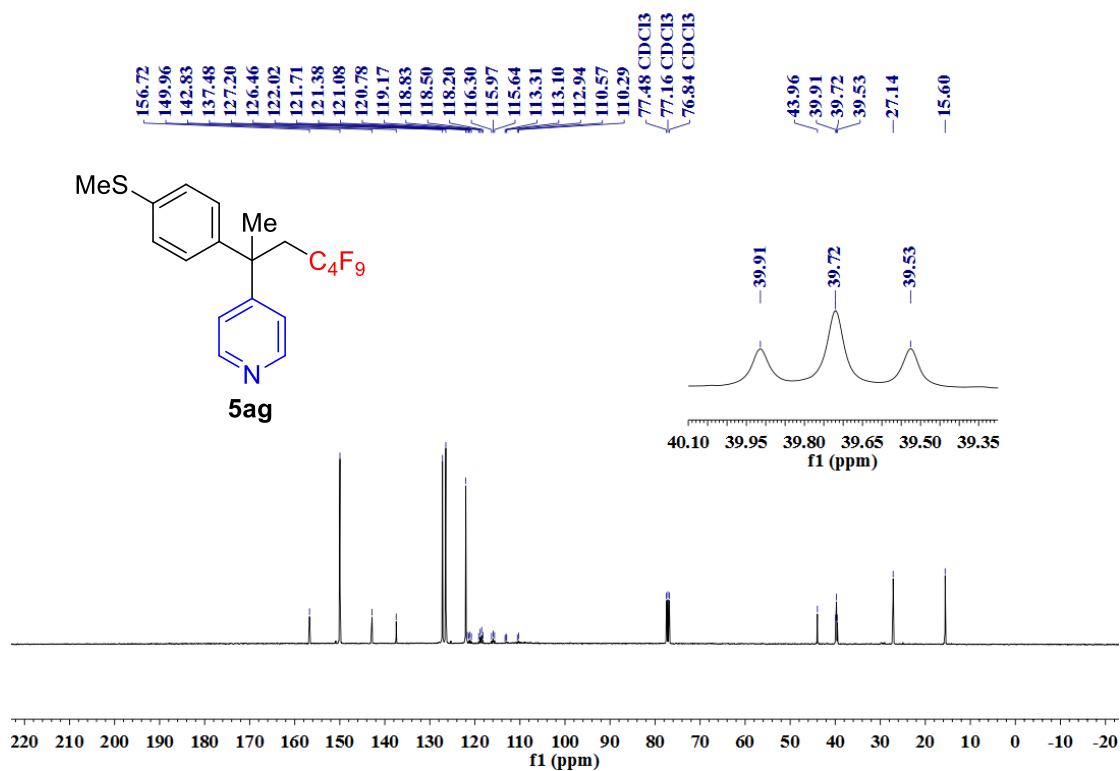

$^{19}\text{F}$  NMR (376 MHz,  $\text{CDCl}_3$ ):

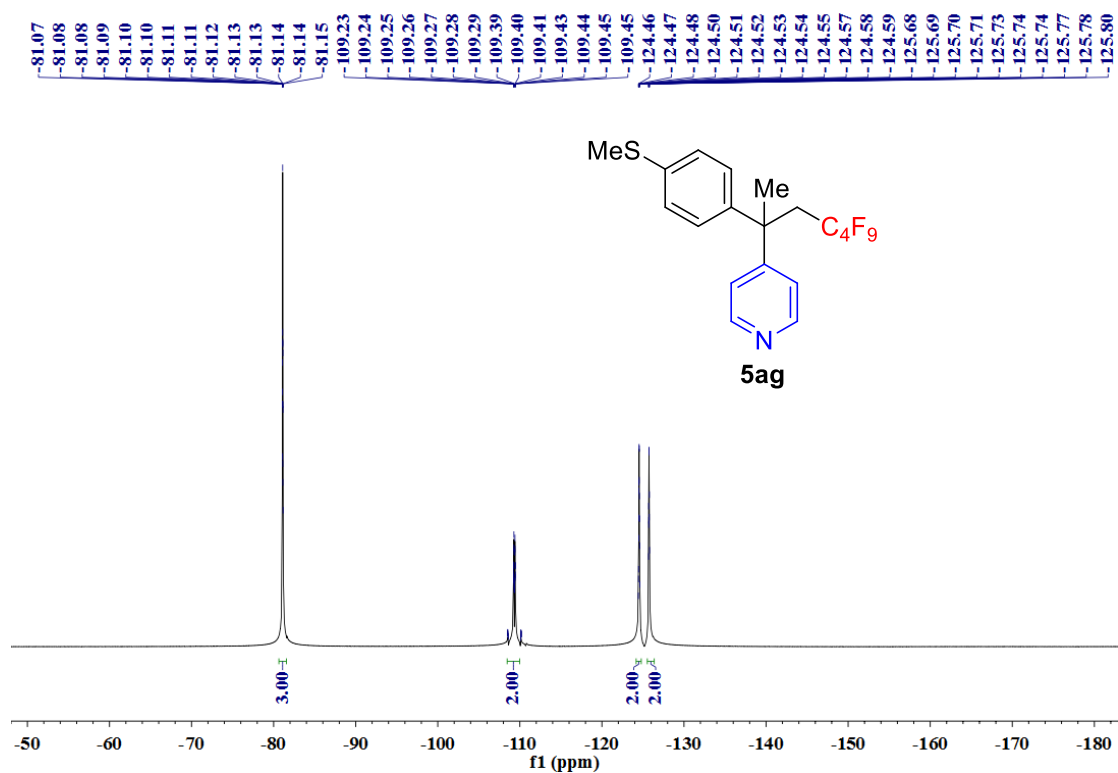

$^1\text{H}$  NMR (400 MHz,  $\text{CDCl}_3$ ):

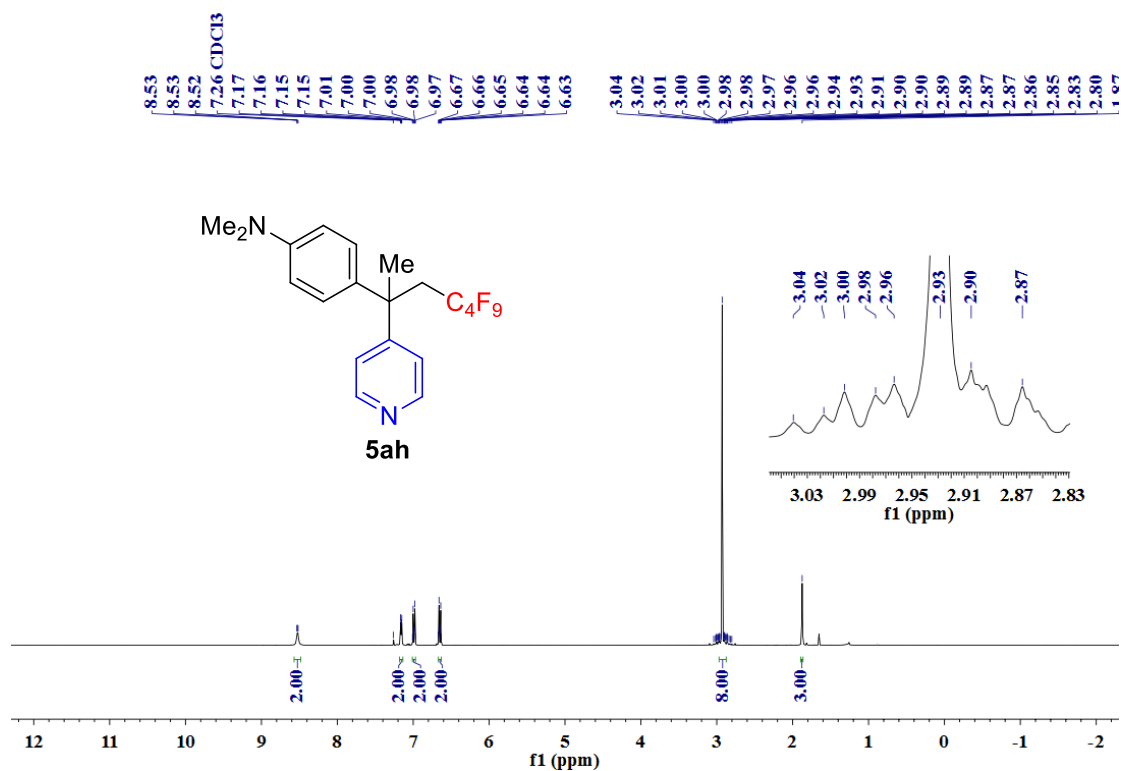

$^{13}\text{C}$  NMR (100 MHz,  $\text{CDCl}_3$ ):

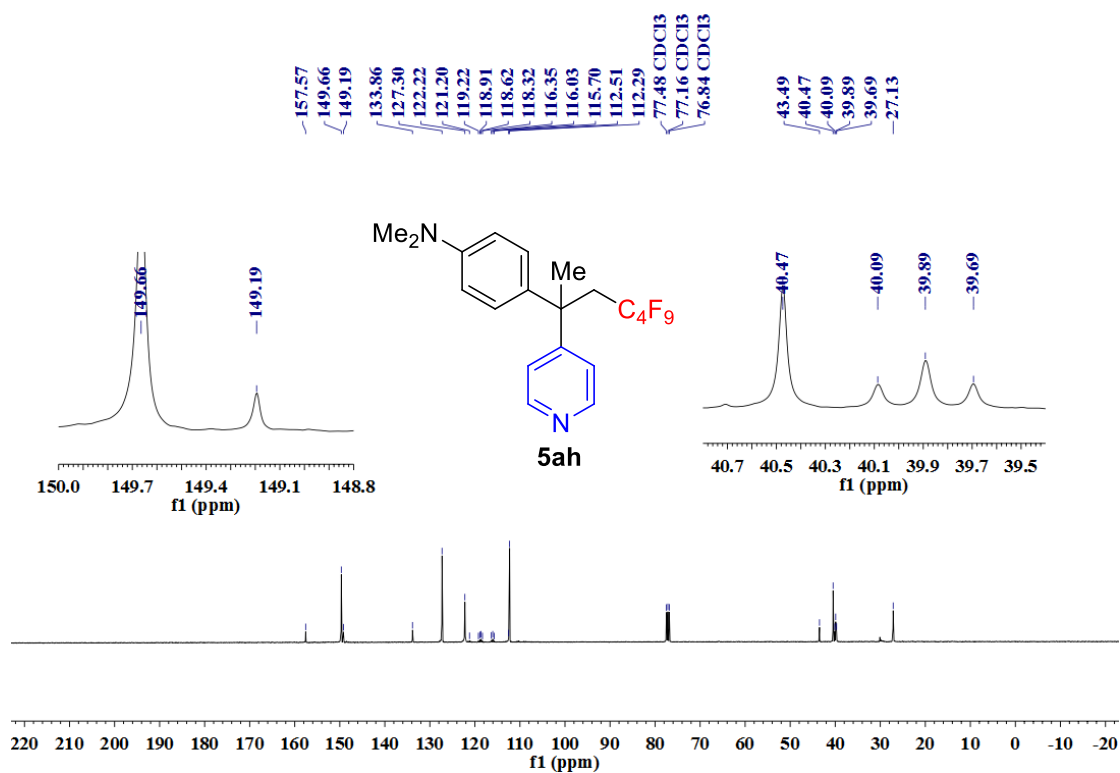

$^{19}\text{F}$  NMR (376 MHz,  $\text{CDCl}_3$ ):

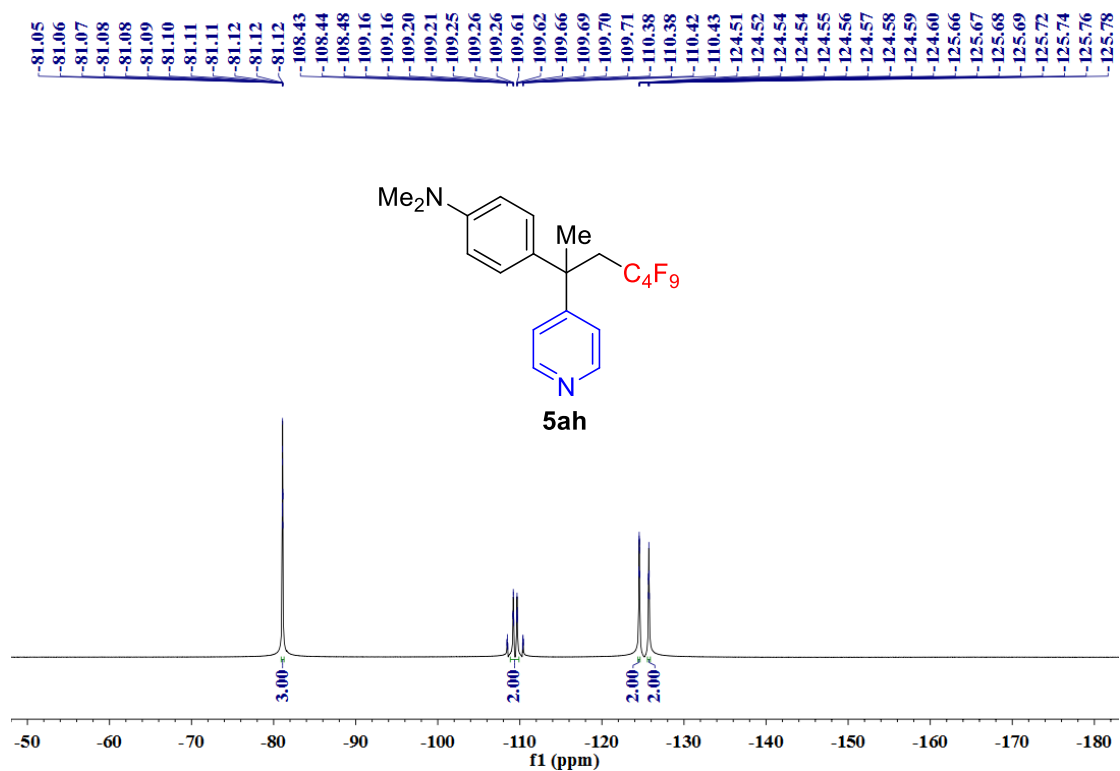

$^1\text{H}$  NMR (400 MHz,  $\text{CDCl}_3$ ):

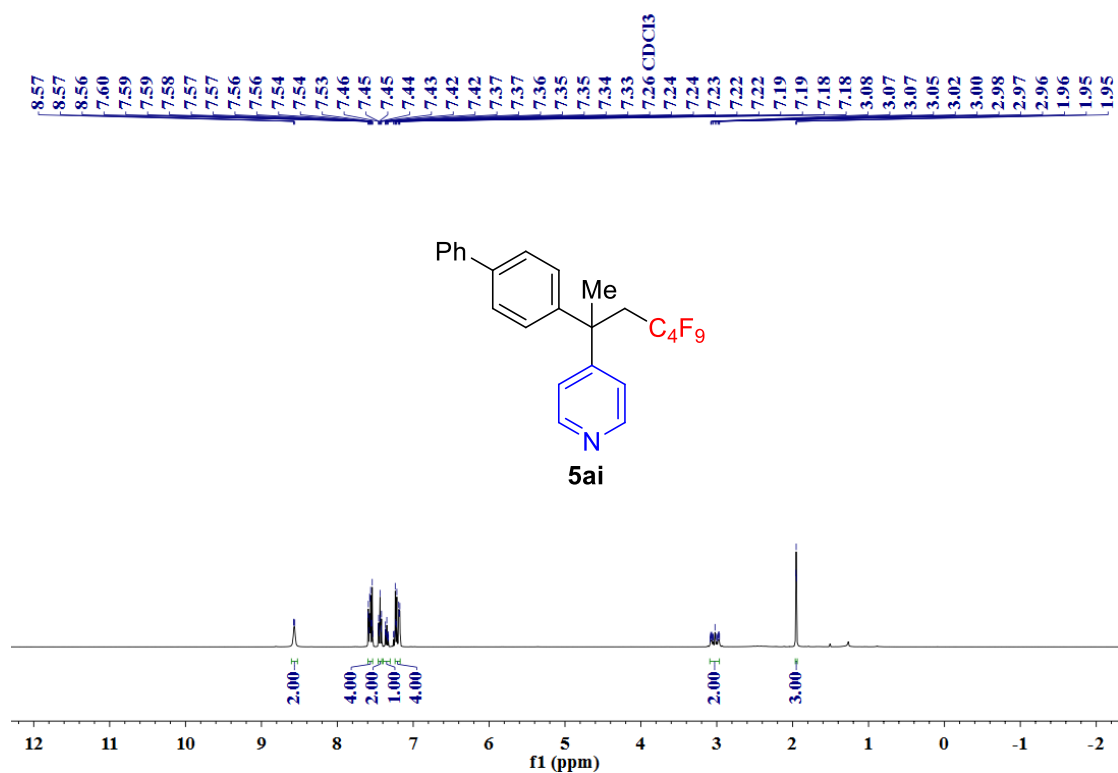

$^{13}\text{C}$  NMR (100 MHz,  $\text{CDCl}_3$ ):

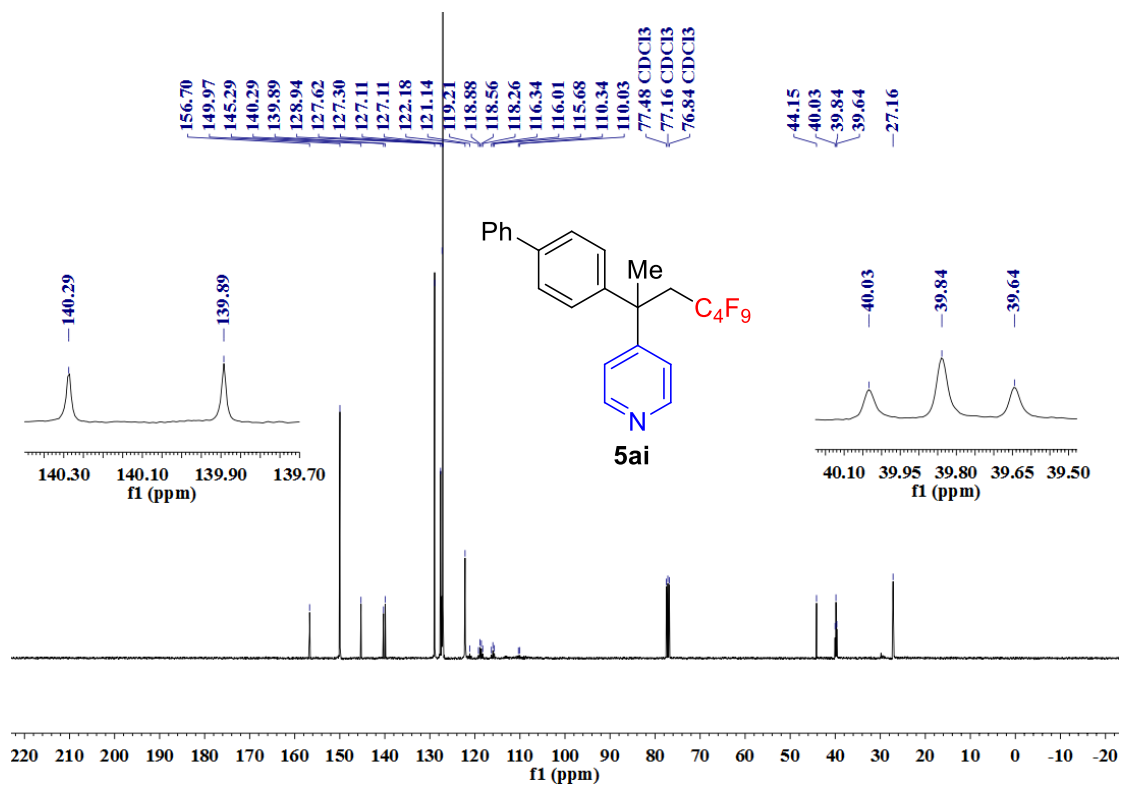

$^{19}\text{F}$  NMR (376 MHz,  $\text{CDCl}_3$ ):

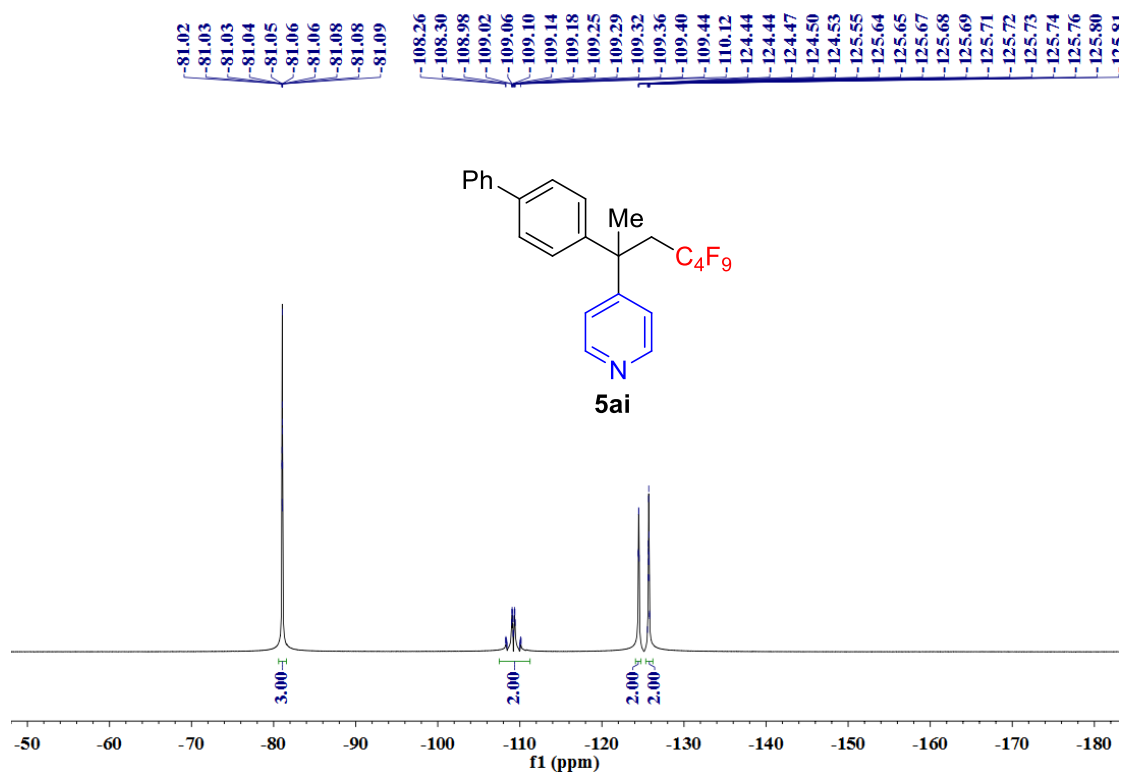

$^1\text{H}$  NMR (400 MHz,  $\text{CDCl}_3$ ):

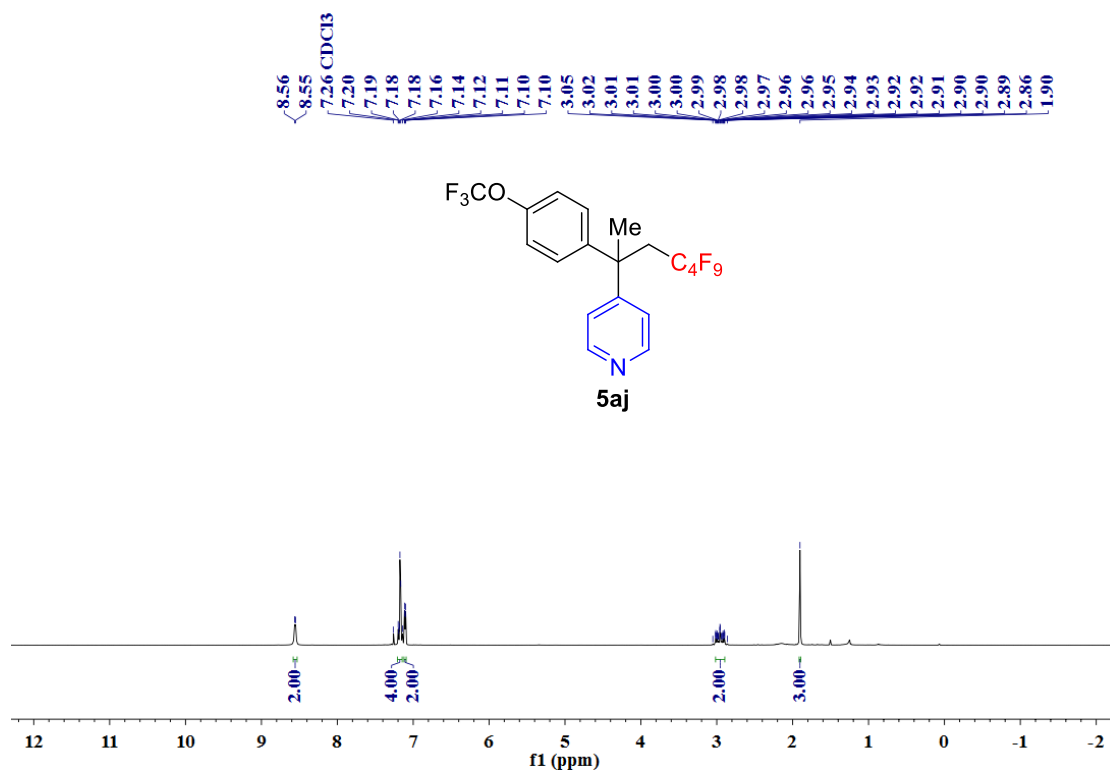

$^{13}\text{C}$  NMR (100 MHz,  $\text{CDCl}_3$ ):

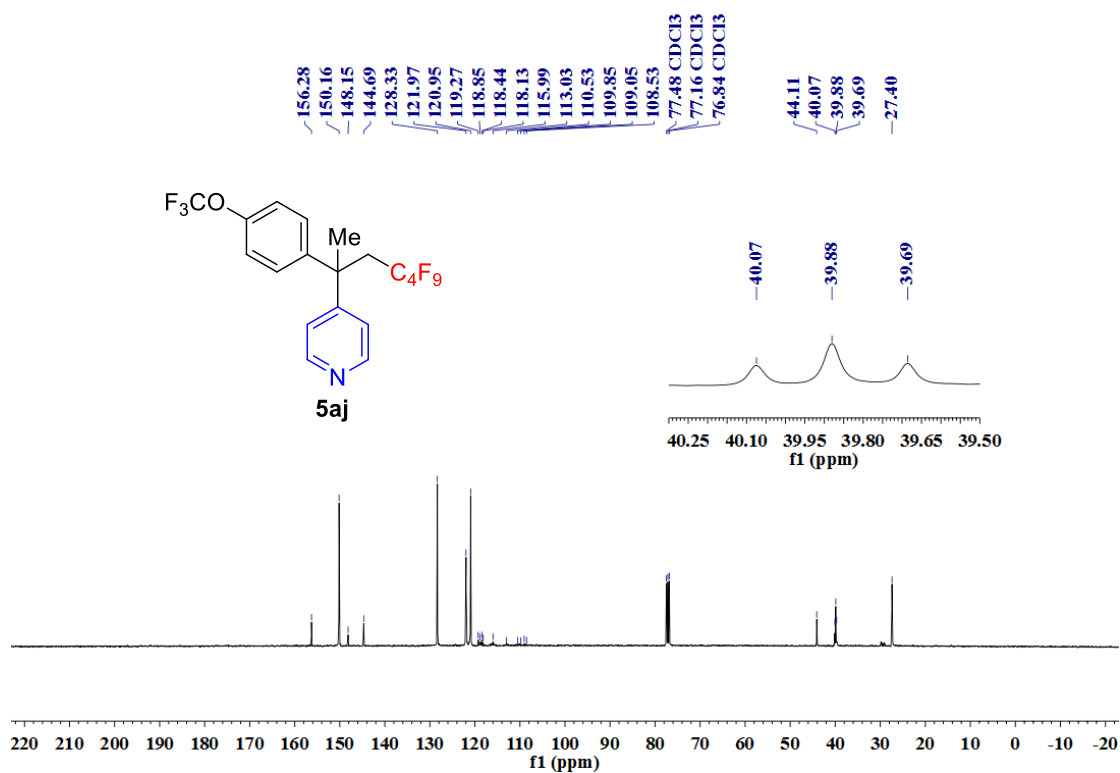

$^{19}\text{F}$  NMR (376 MHz,  $\text{CDCl}_3$ ):

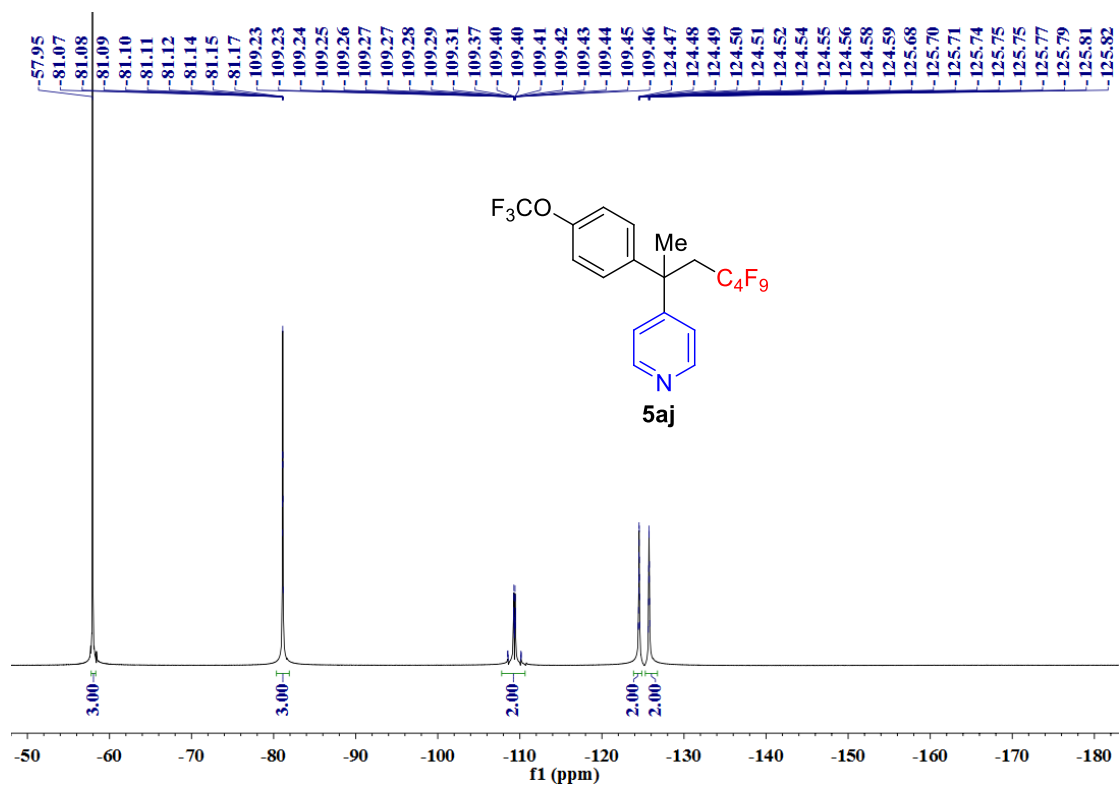



$^1\text{H}$  NMR (400 MHz,  $\text{CDCl}_3$ ):

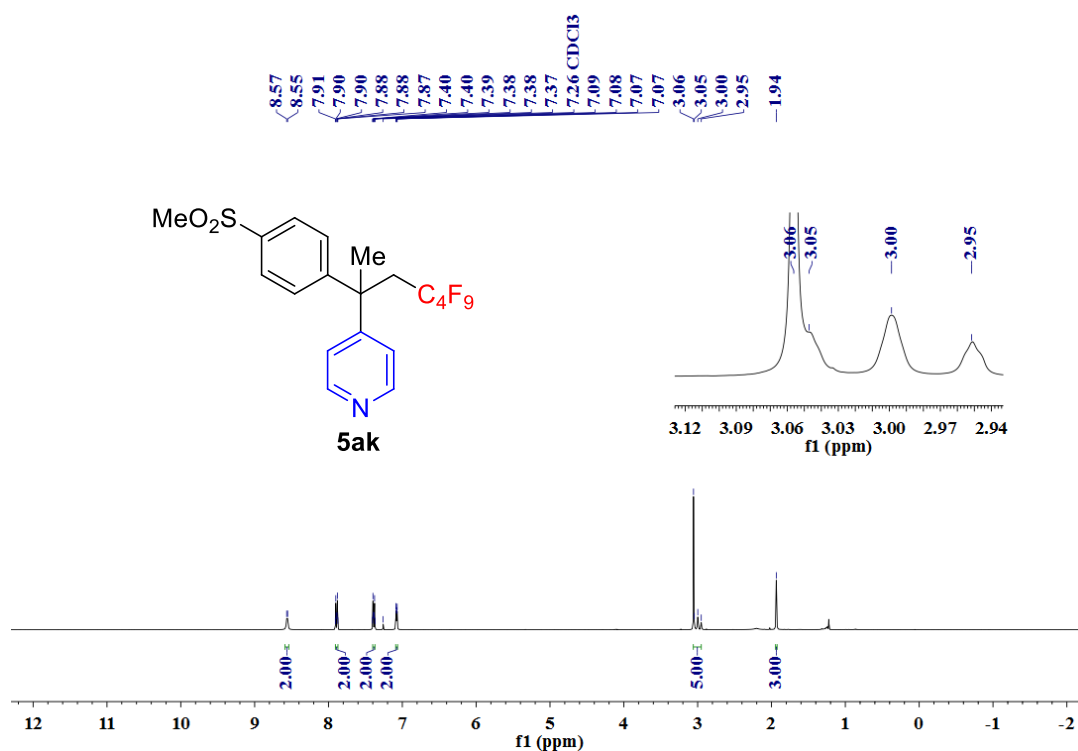

$^{13}\text{C}$  NMR (100 MHz,  $\text{CDCl}_3$ ):

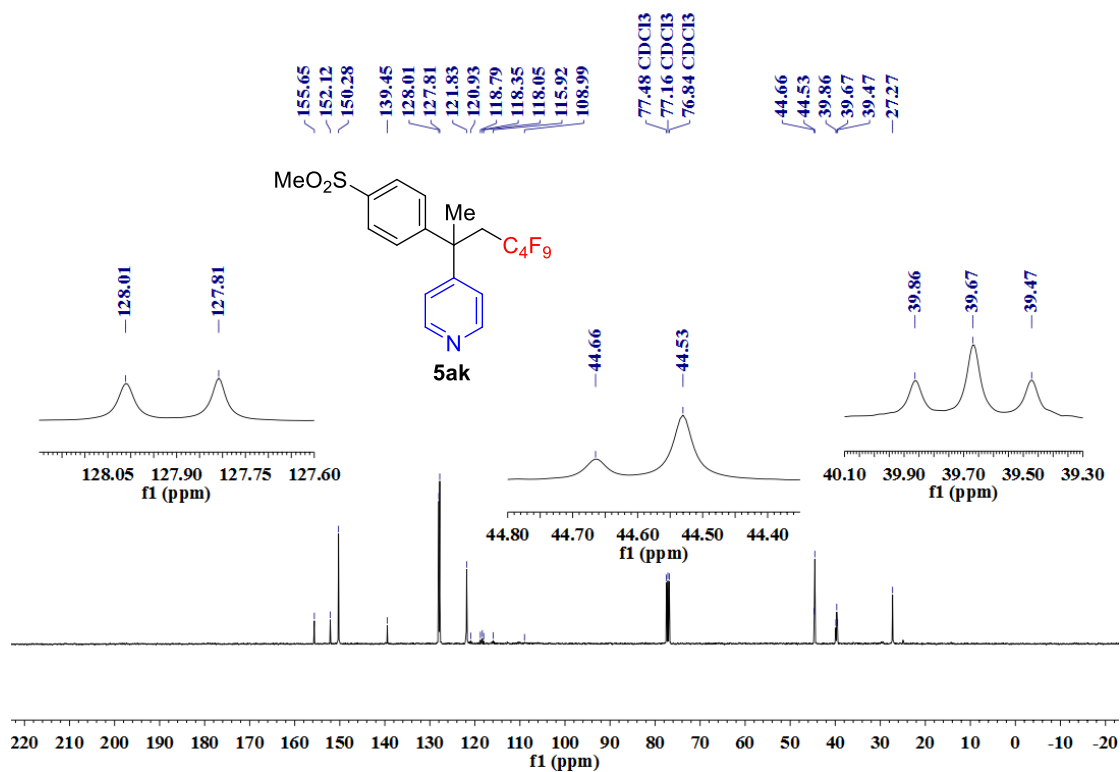

$^{19}\text{F}$  NMR (376 MHz,  $\text{CDCl}_3$ ):

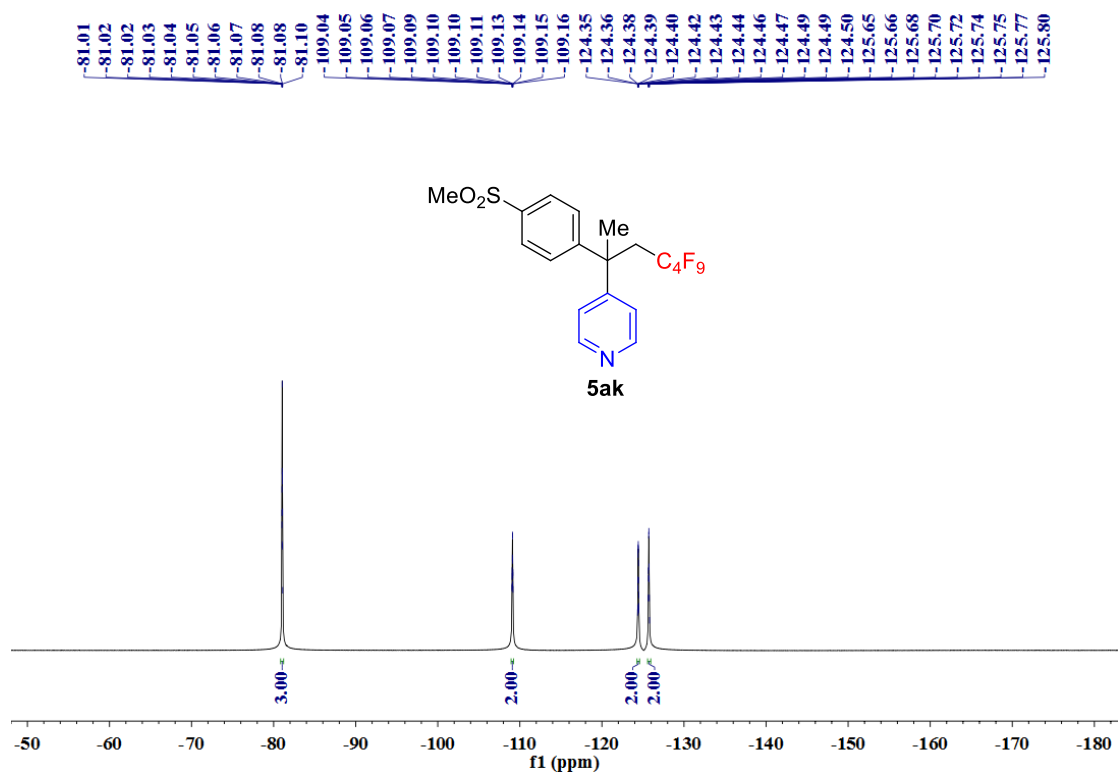

$^1\text{H}$  NMR (400 MHz,  $\text{CDCl}_3$ ):

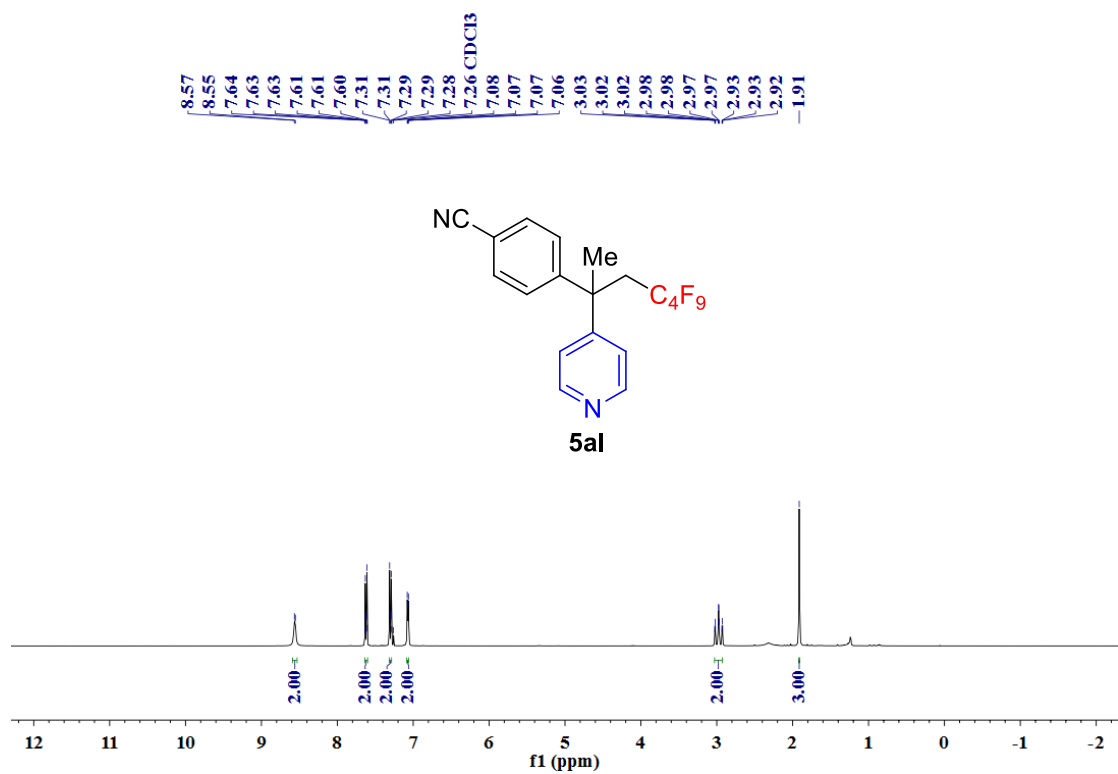

$^{13}\text{C}$  NMR (100 MHz,  $\text{CDCl}_3$ ):

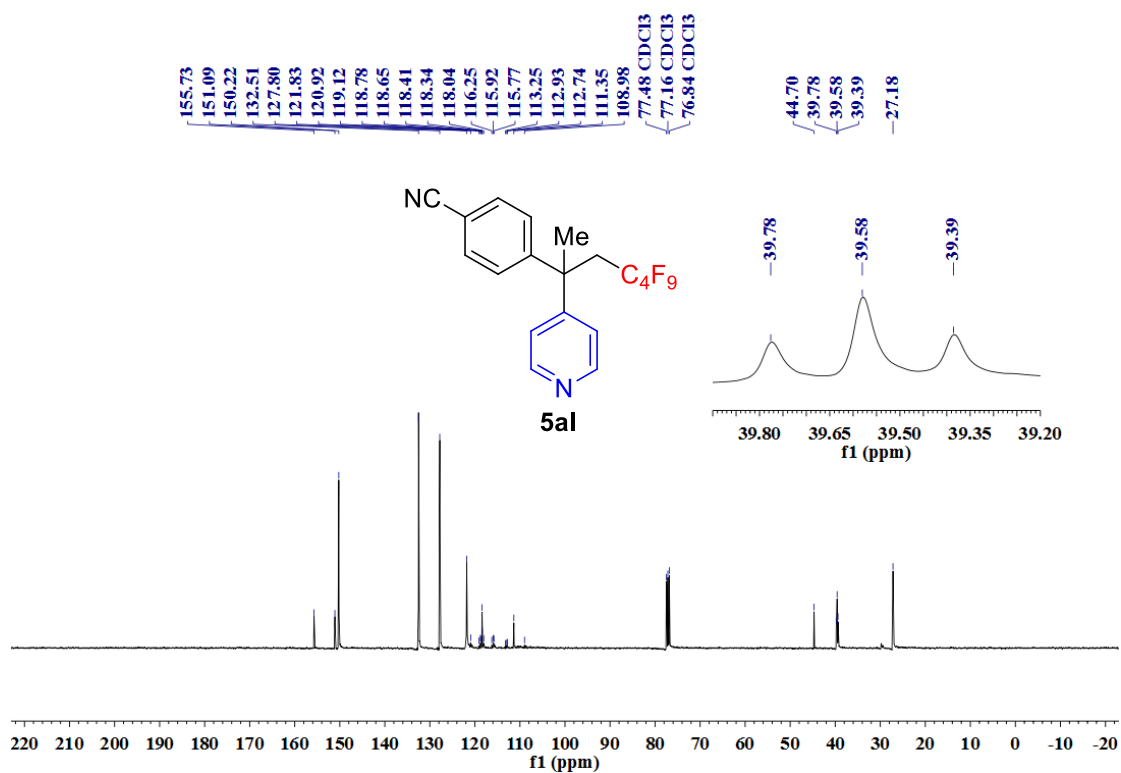

$^{19}\text{F}$  NMR (376 MHz,  $\text{CDCl}_3$ )

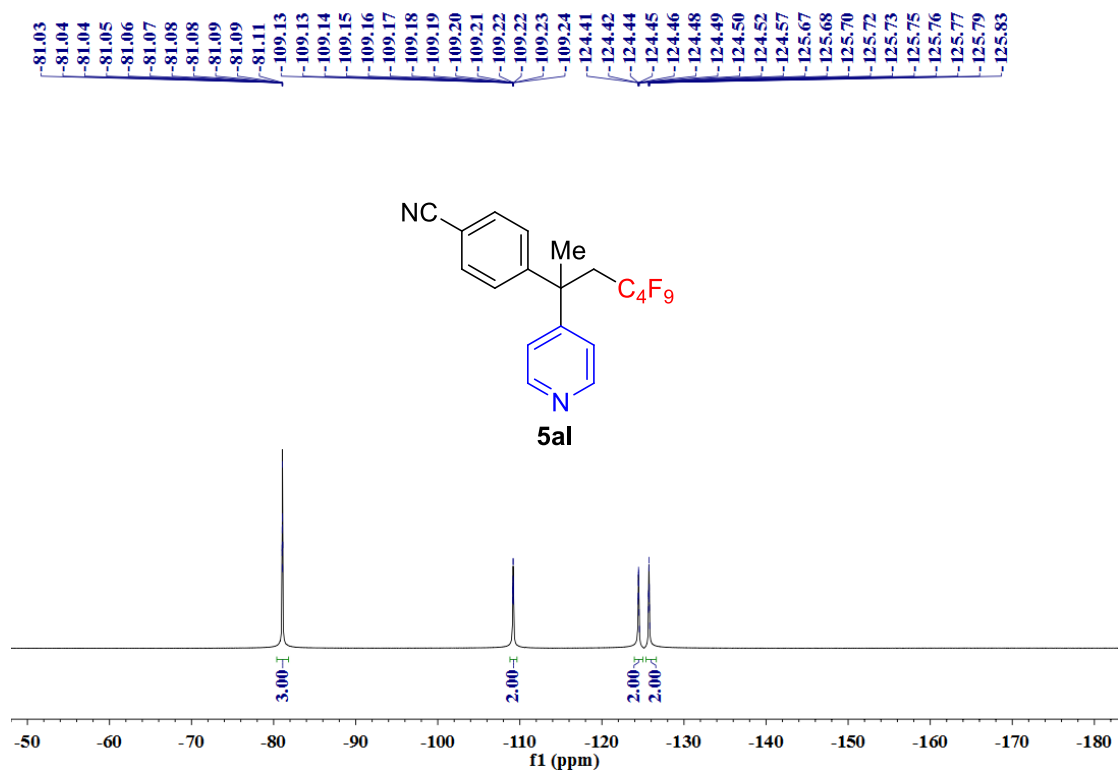

$^1\text{H}$  NMR (400 MHz,  $\text{CDCl}_3$ ):

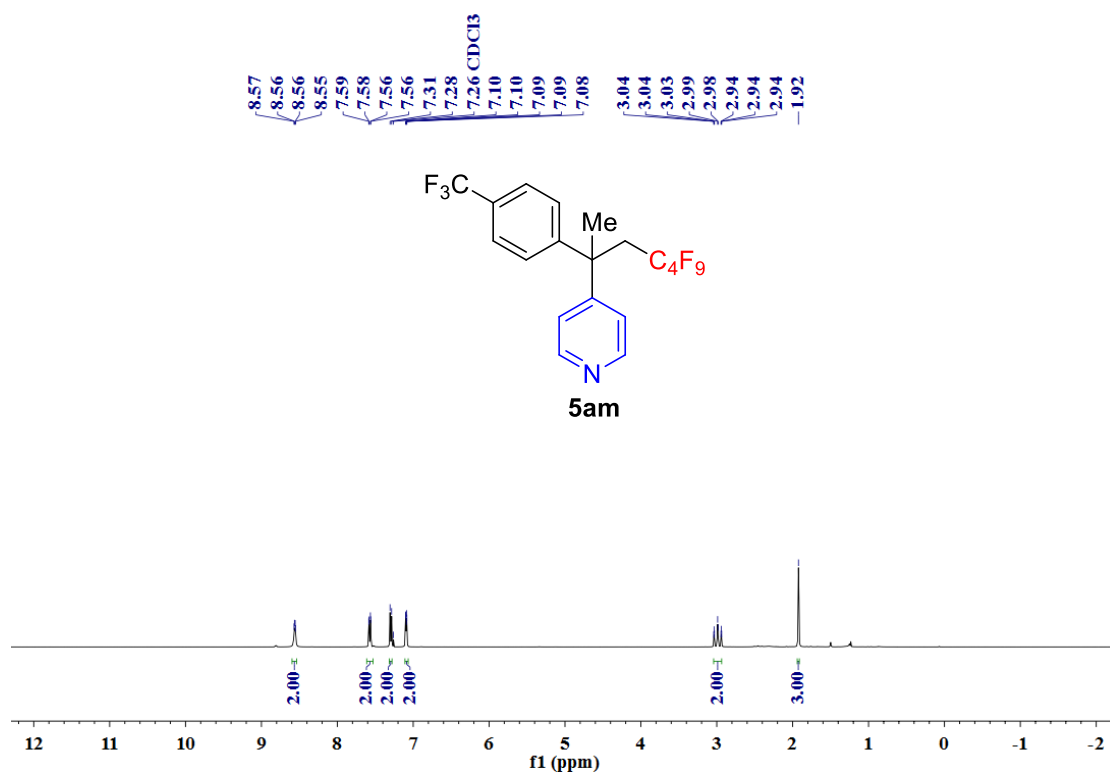

$^{13}\text{C}$  NMR (100 MHz,  $\text{CDCl}_3$ ):

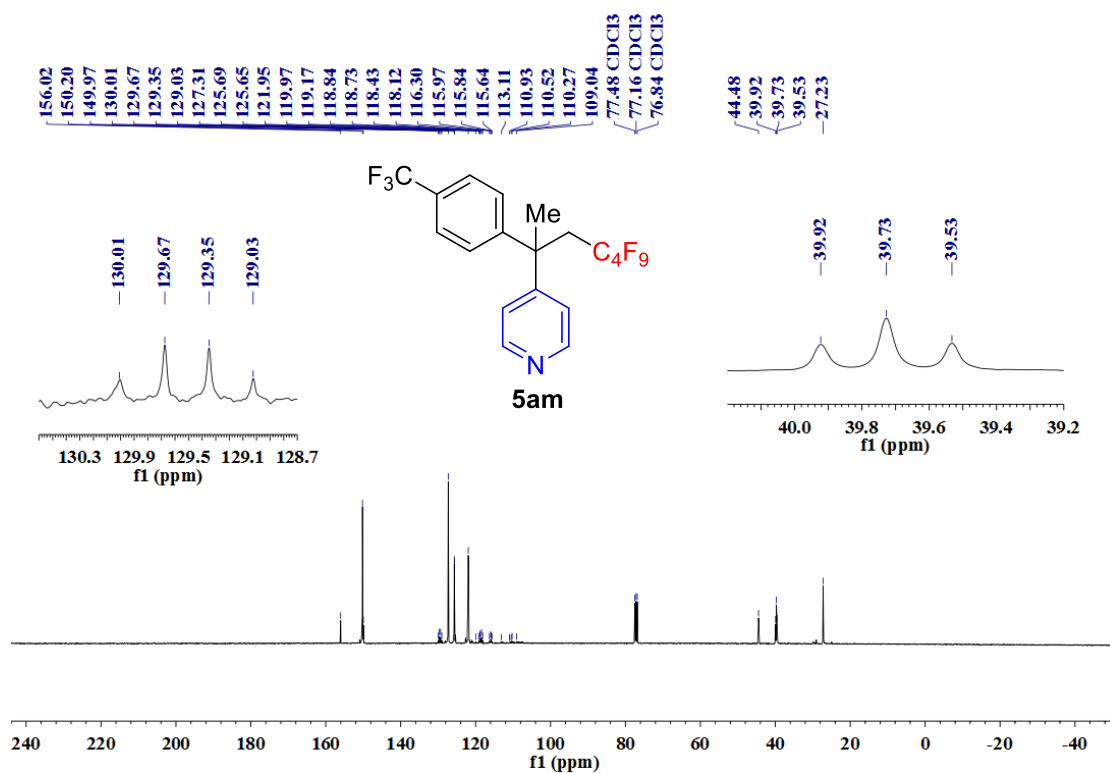

$^{19}\text{F}$  NMR (376 MHz,  $\text{CDCl}_3$ ):

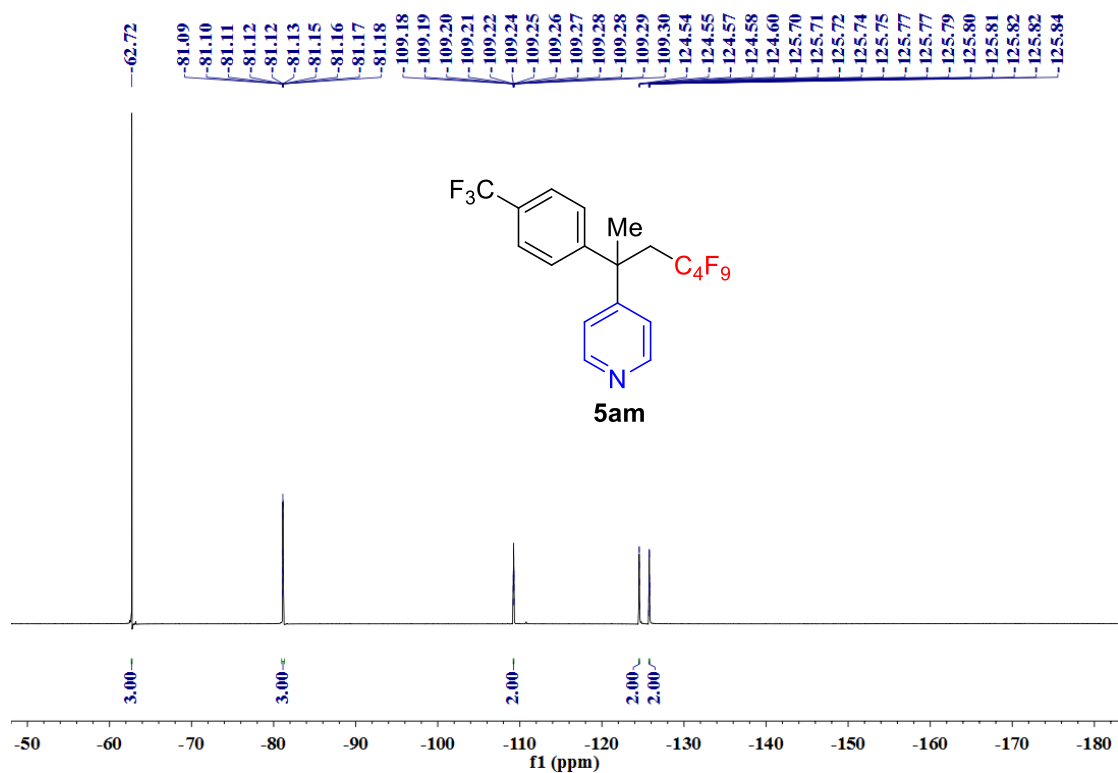

$^1\text{H}$  NMR (400 MHz,  $\text{CDCl}_3$ ):

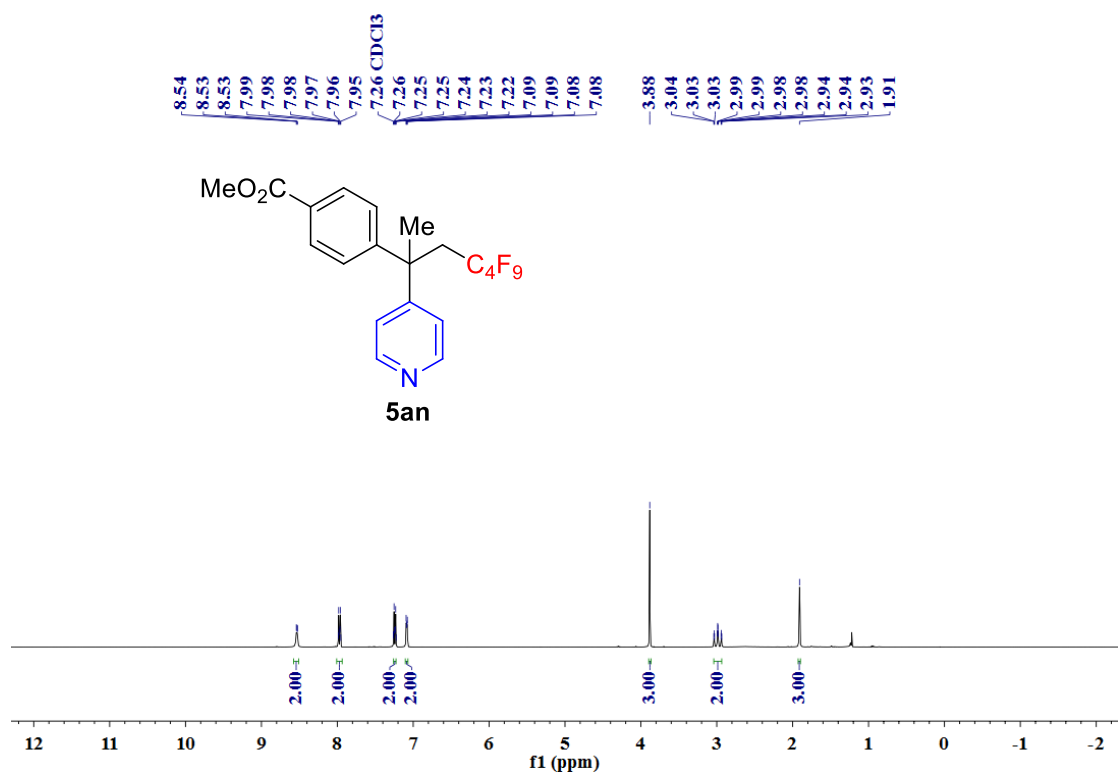

$^{13}\text{C}$  NMR (100 MHz,  $\text{CDCl}_3$ ):

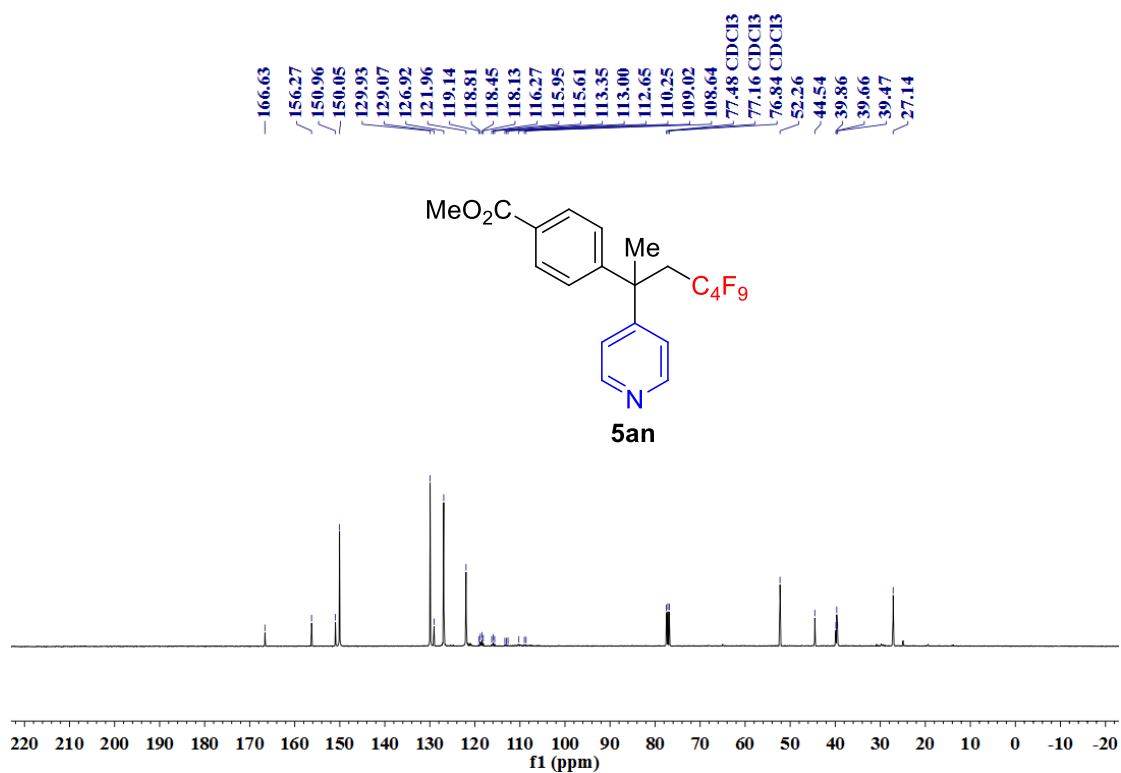

$^{19}\text{F}$  NMR (376 MHz,  $\text{CDCl}_3$ ):

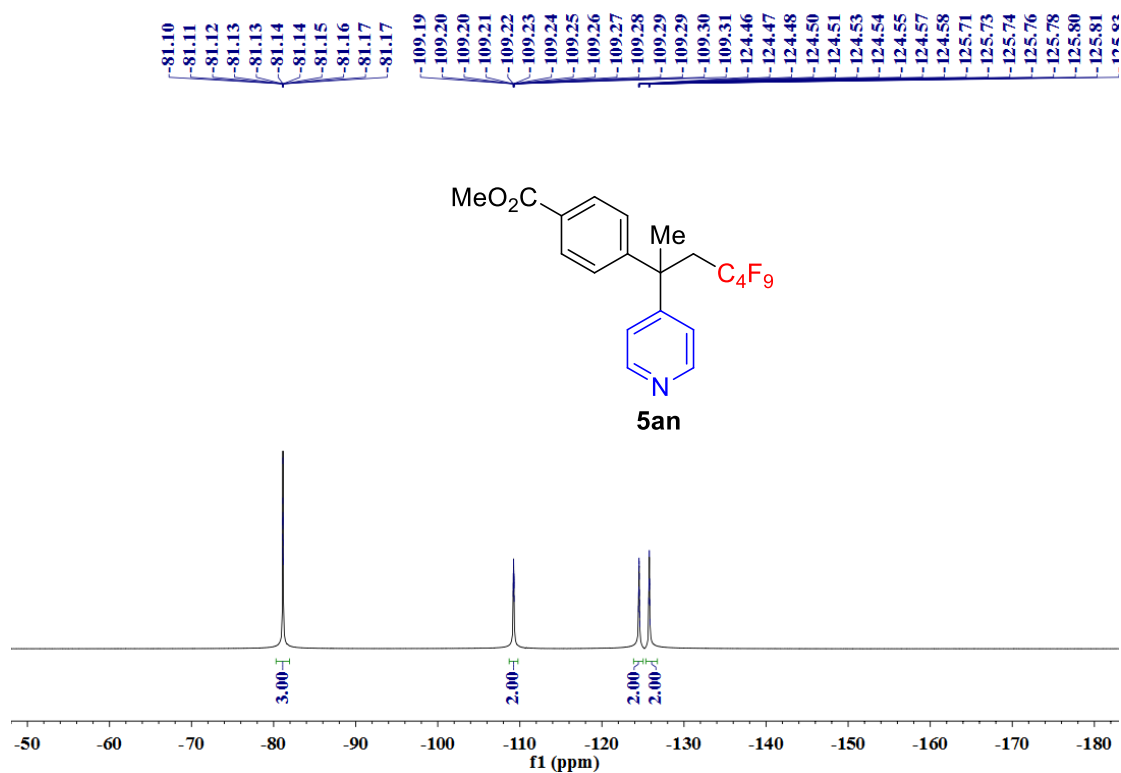

$^1\text{H}$  NMR (400 MHz,  $\text{CDCl}_3$ ):

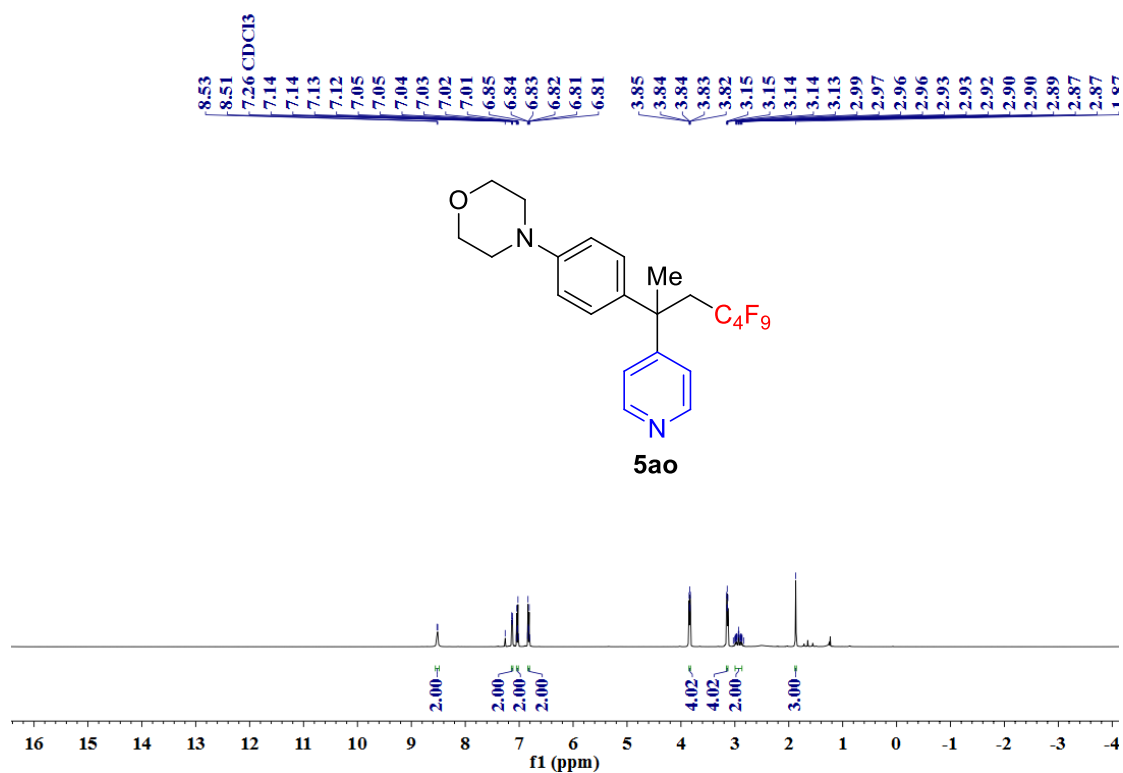

$^{13}\text{C}$  NMR (100 MHz,  $\text{CDCl}_3$ ):

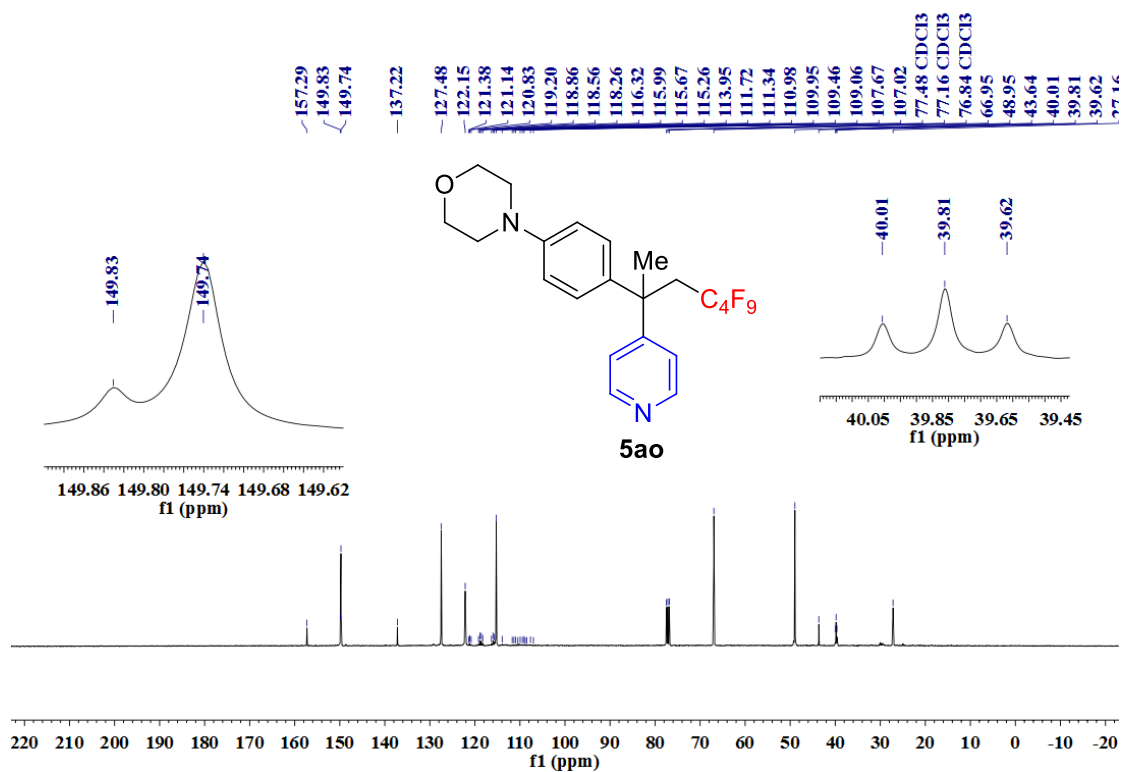

$^{19}\text{F}$  NMR (376 MHz,  $\text{CDCl}_3$ ):

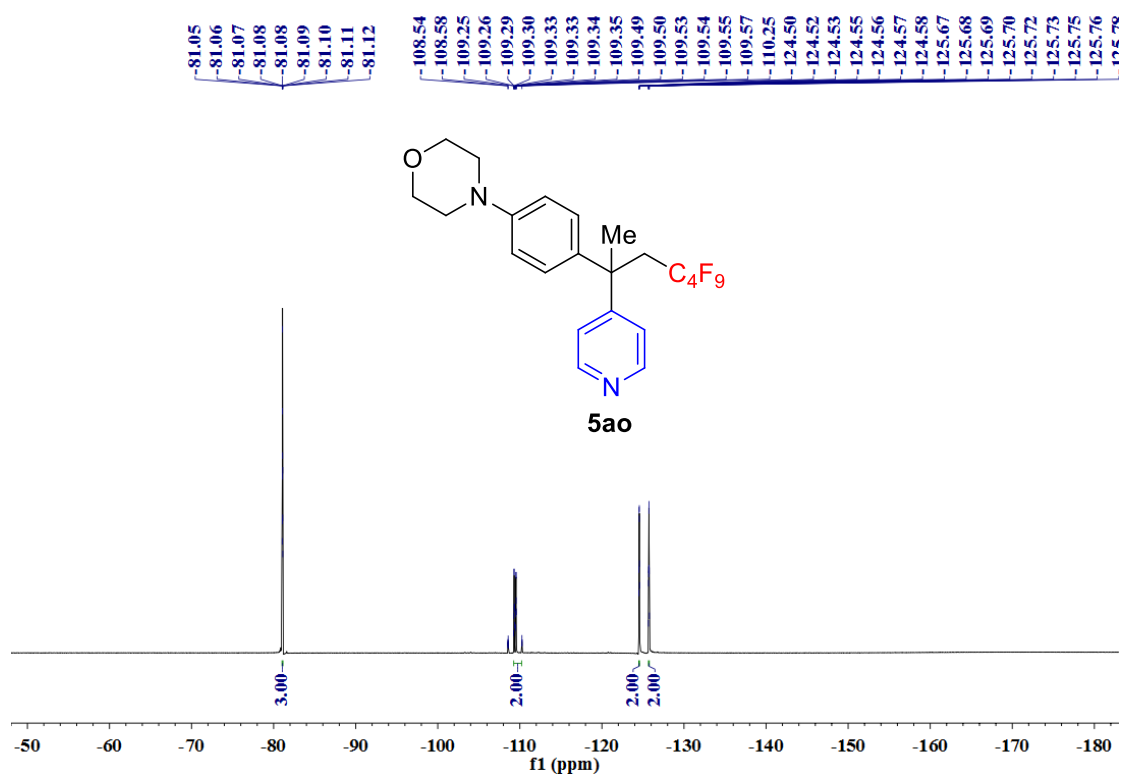

$^1\text{H}$  NMR (400 MHz,  $\text{CDCl}_3$ ):

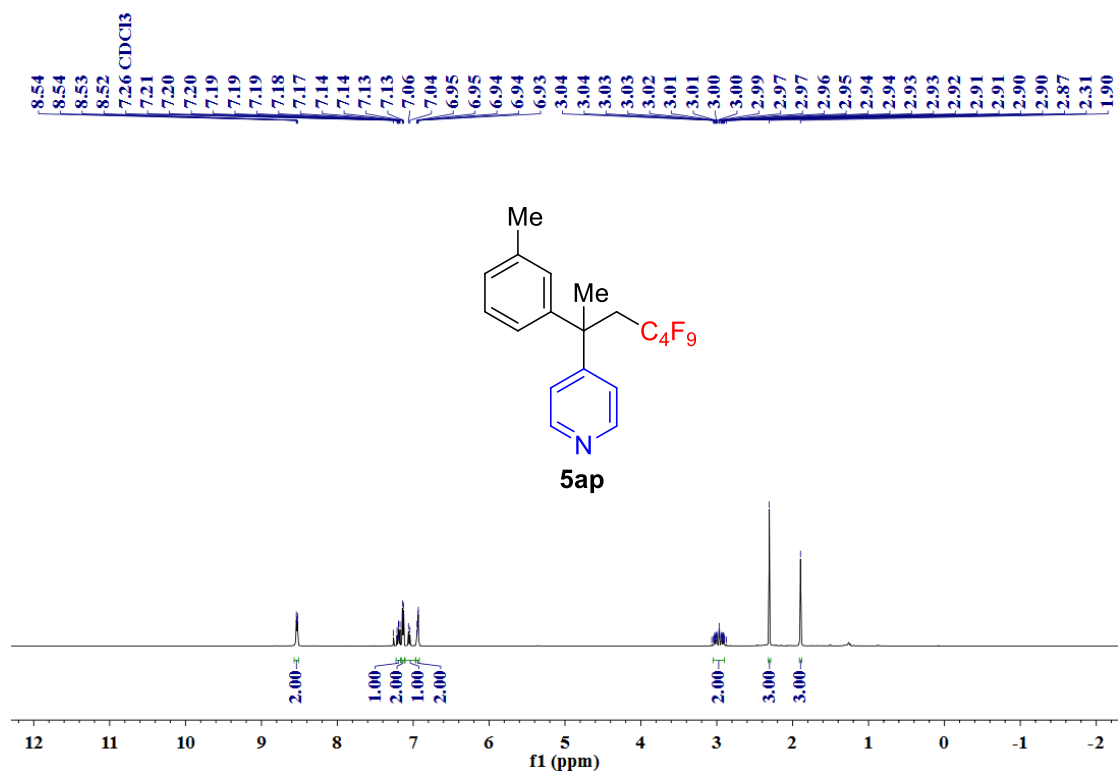



$^{13}\text{C}$  NMR (100 MHz,  $\text{CDCl}_3$ ):

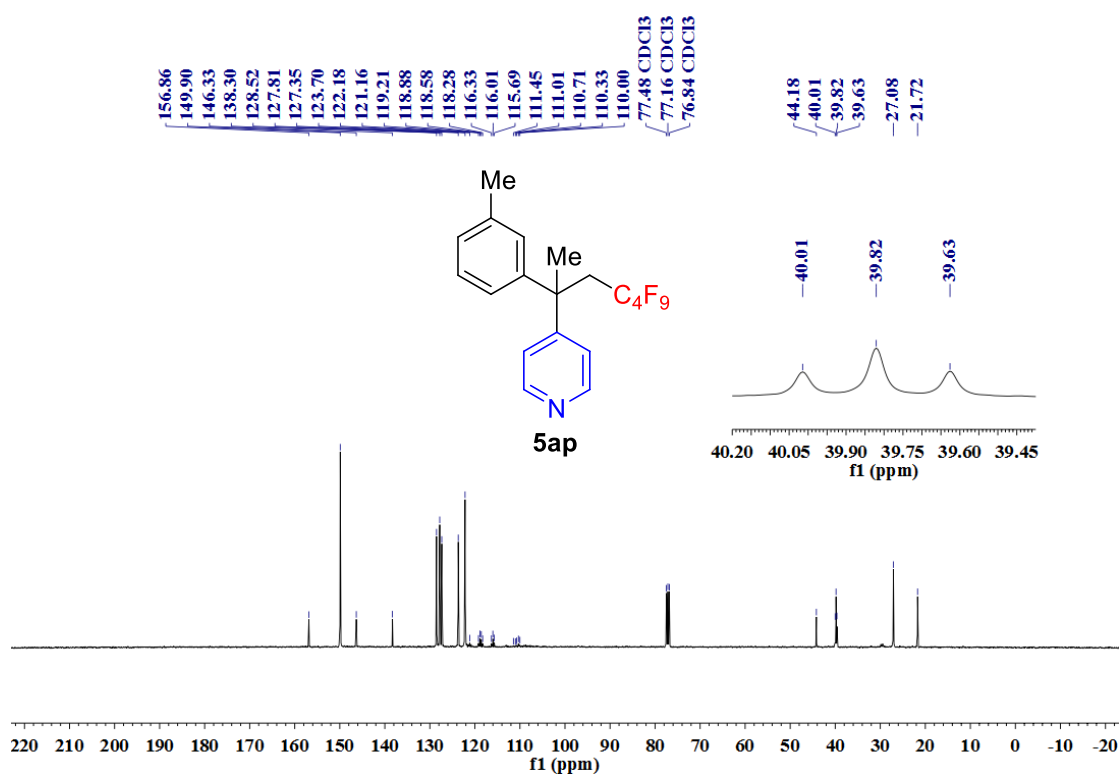

$^{19}\text{F}$  NMR (376 MHz,  $\text{CDCl}_3$ ):

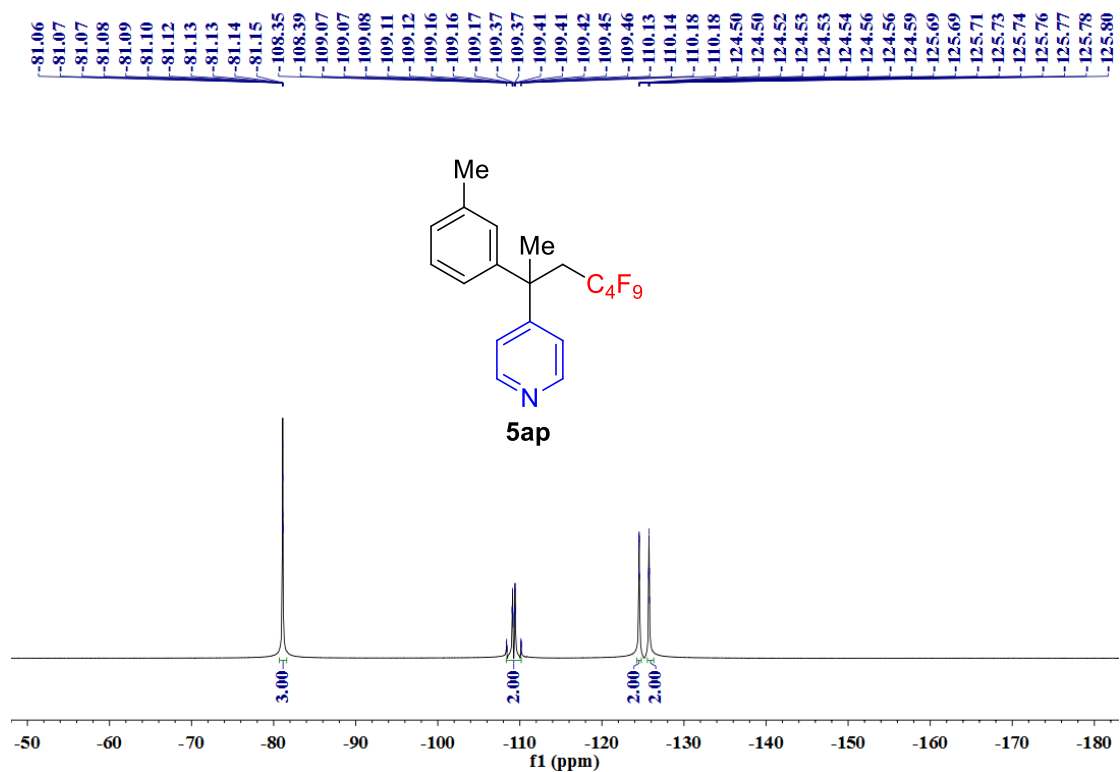

$^1\text{H}$  NMR (400 MHz,  $\text{CDCl}_3$ ):

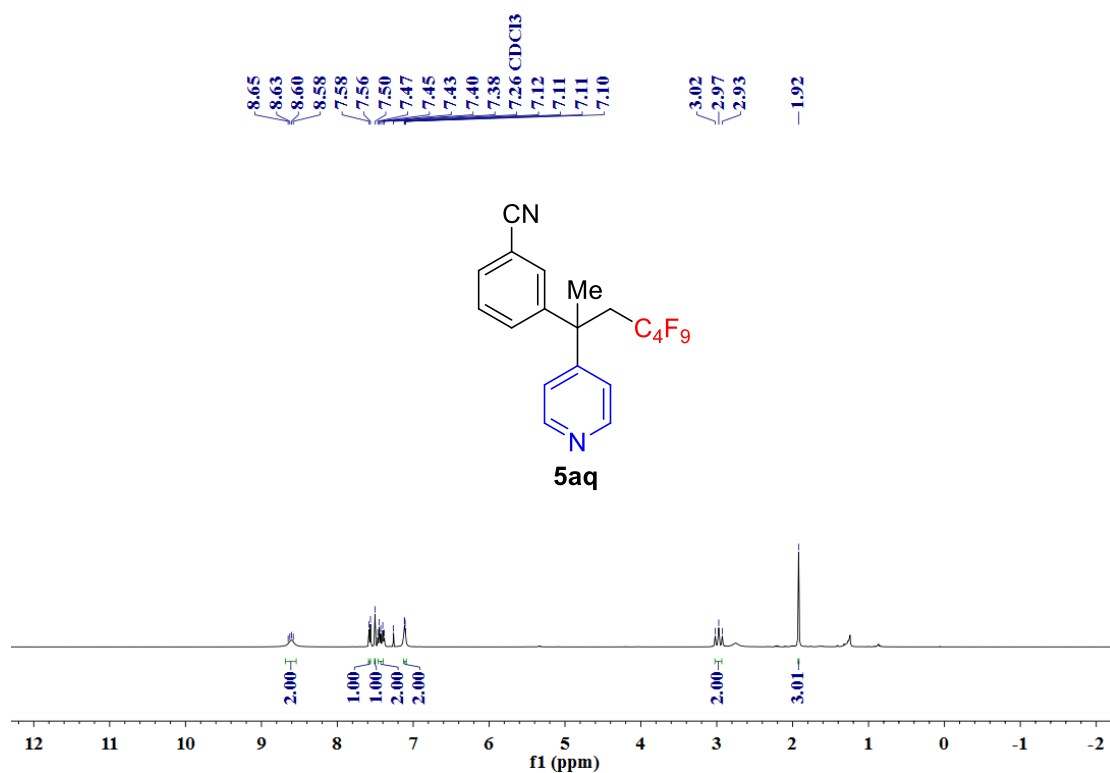

$^{13}\text{C}$  NMR (100 MHz,  $\text{CDCl}_3$ ):

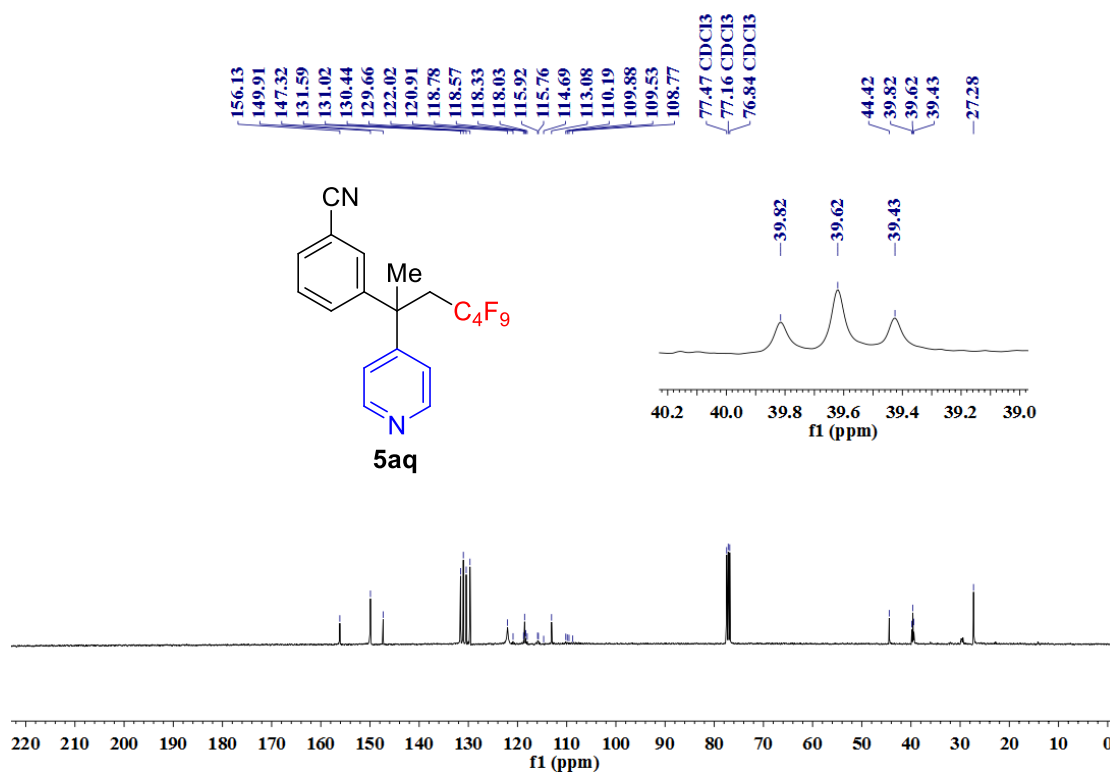

$^{19}\text{F}$  NMR (376 MHz,  $\text{CDCl}_3$ ):

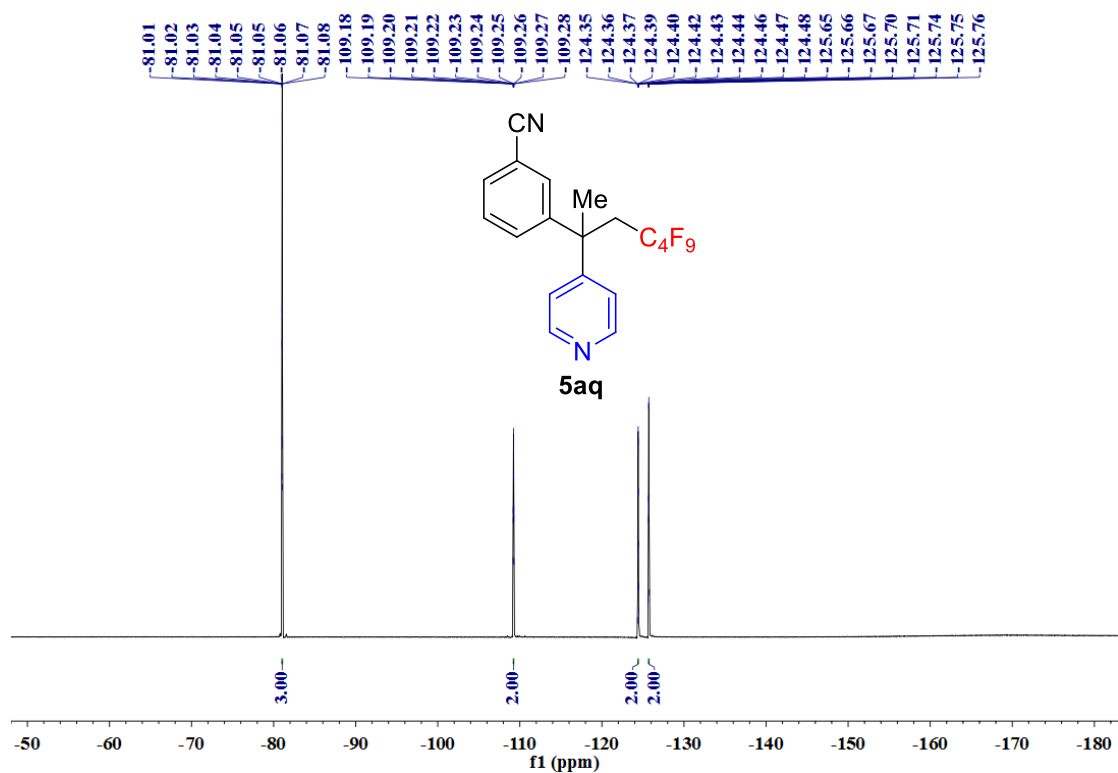

$^1\text{H}$  NMR (400 MHz,  $\text{CDCl}_3$ ):

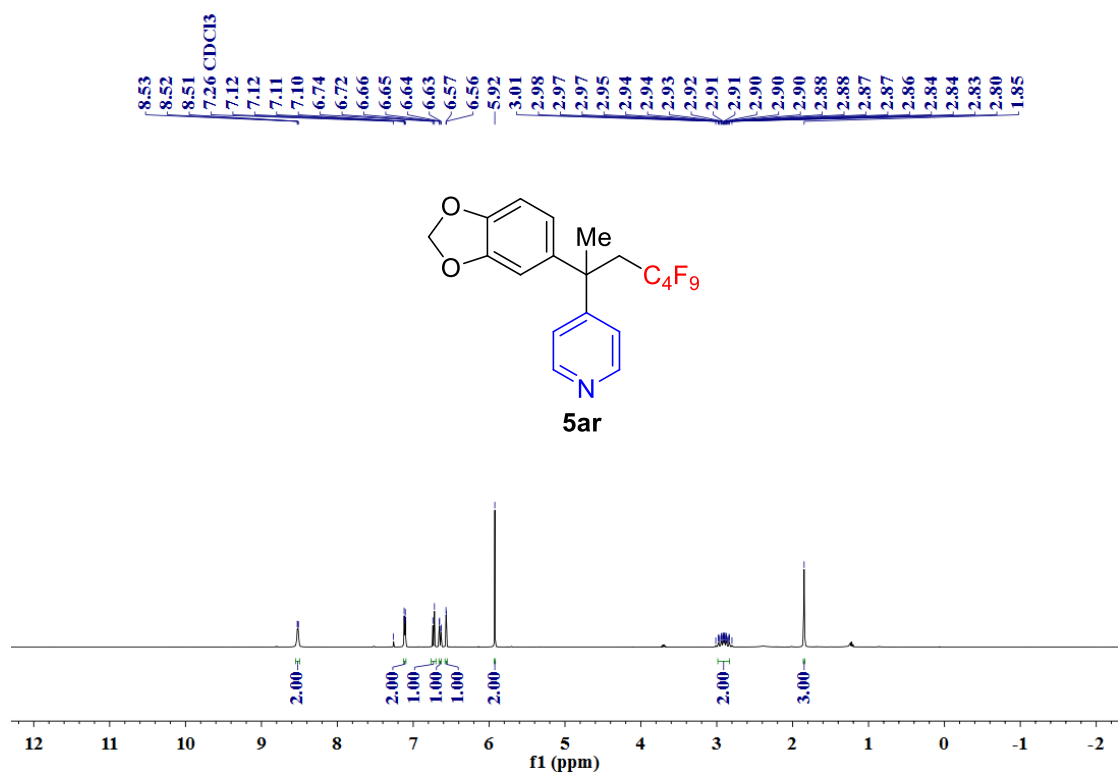

$^{13}\text{C}$  NMR (100 MHz,  $\text{CDCl}_3$ ):

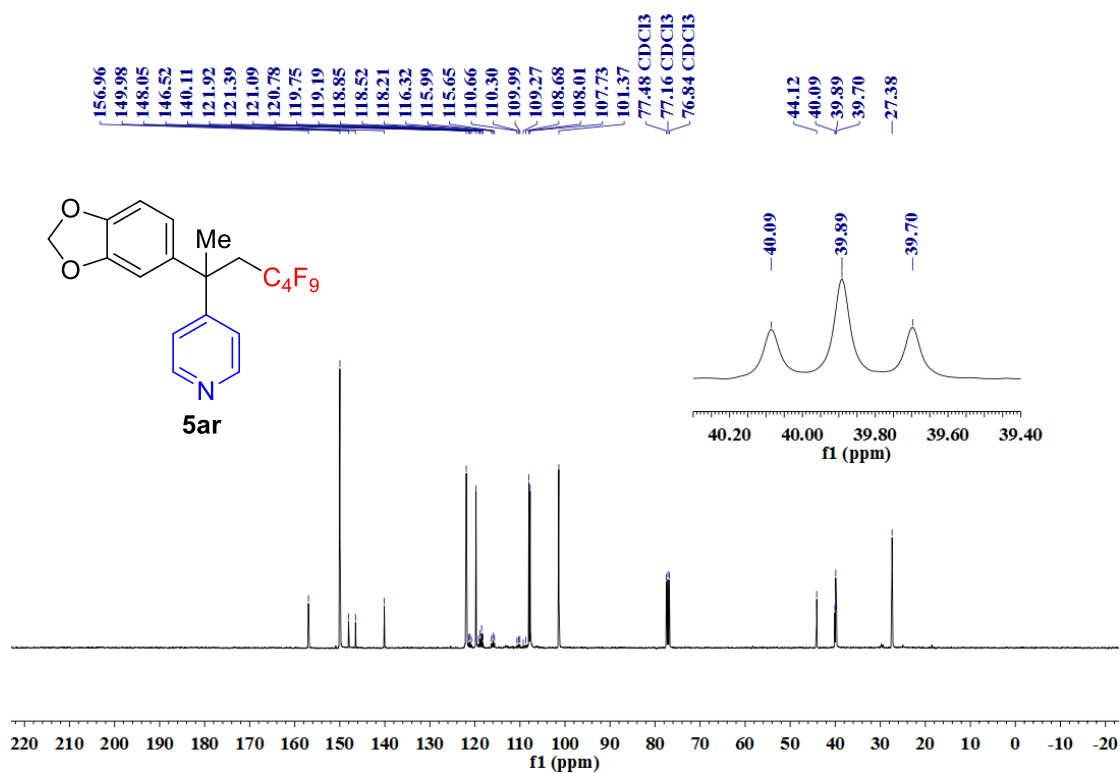

$^{19}\text{F}$  NMR (376 MHz,  $\text{CDCl}_3$ ):

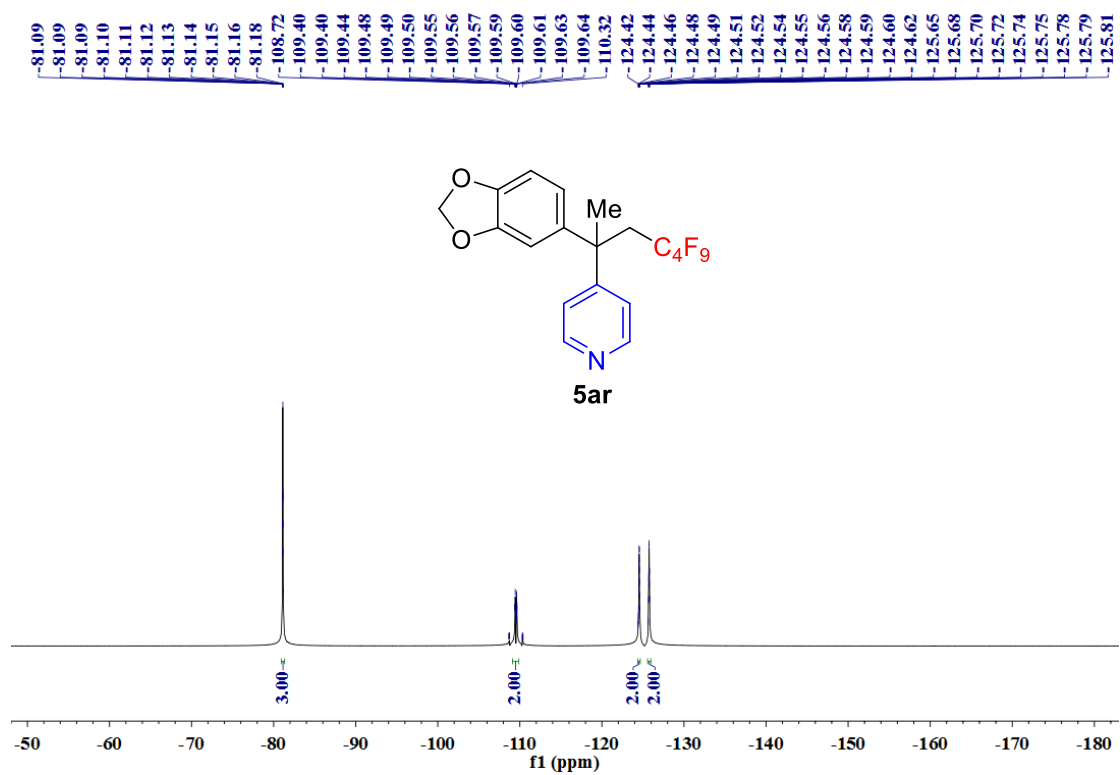

$^1\text{H}$  NMR (400 MHz,  $\text{CDCl}_3$ ):

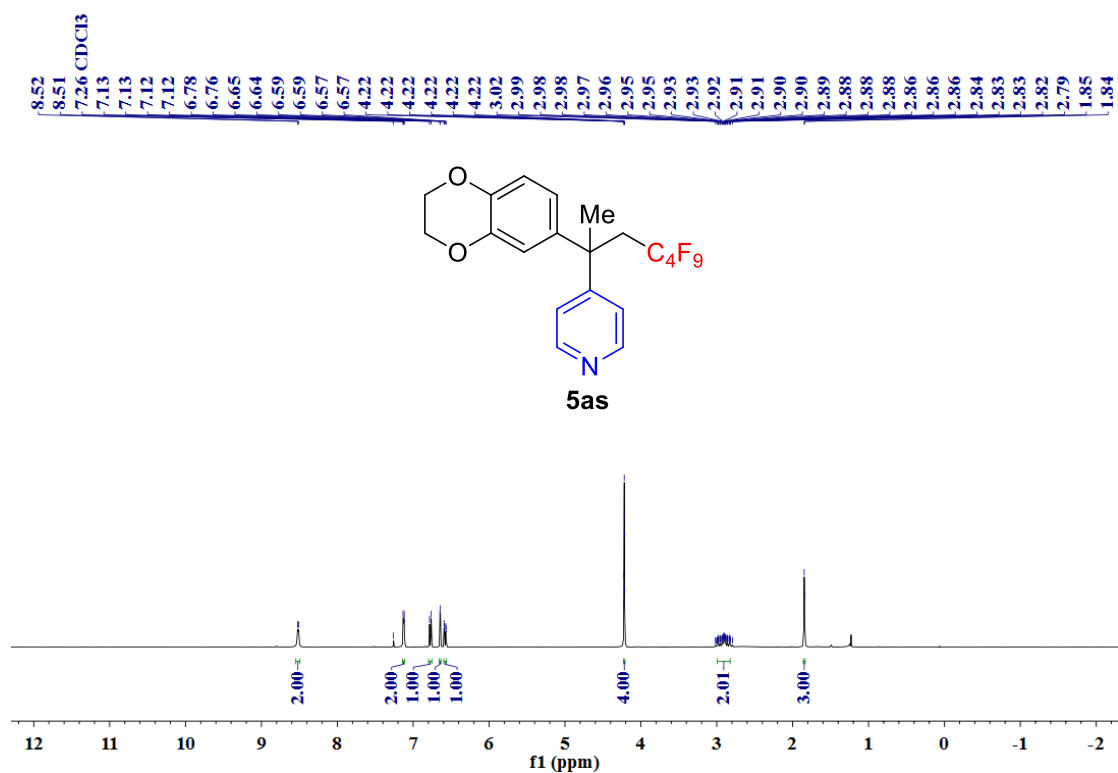

$^{13}\text{C}$  NMR (100 MHz,  $\text{CDCl}_3$ ):

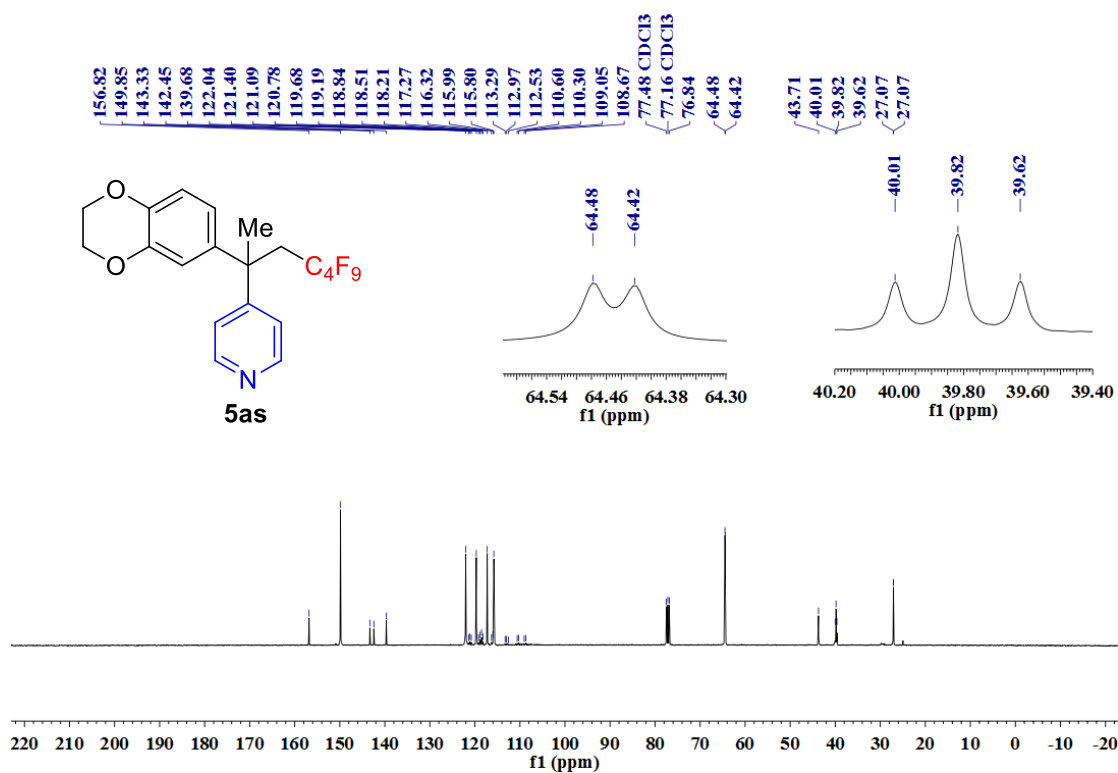

$^{19}\text{F}$  NMR (376 MHz,  $\text{CDCl}_3$ ):

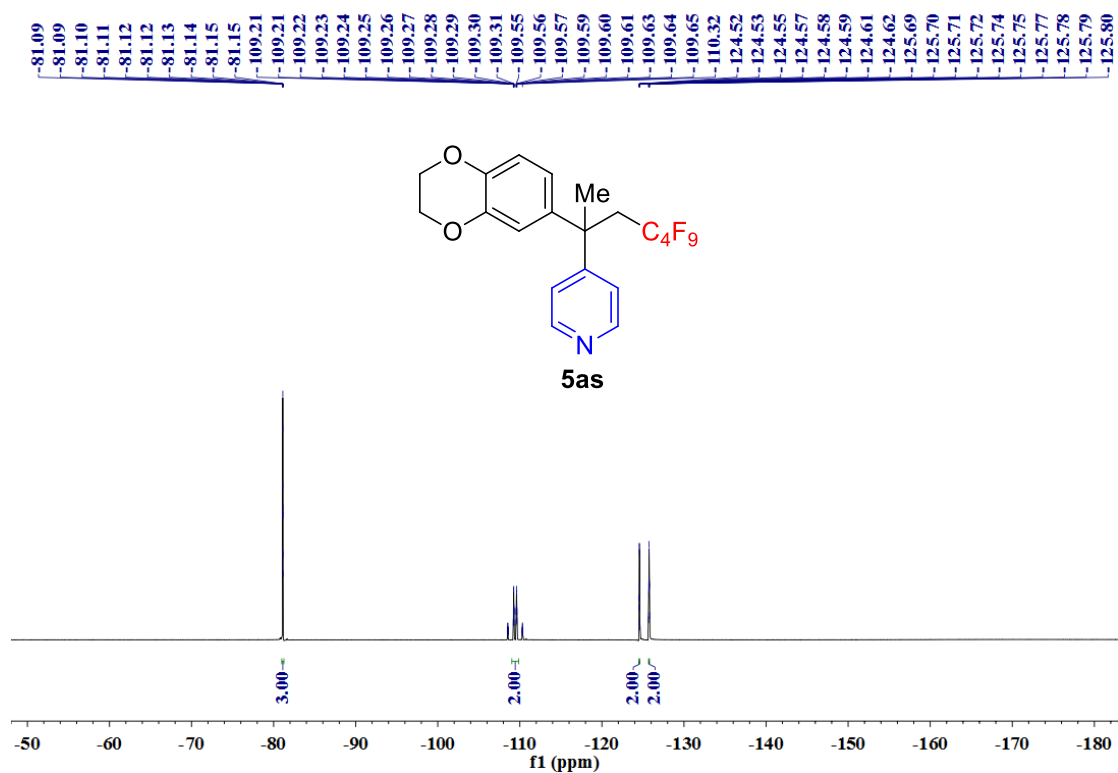

$^1\text{H}$  NMR (400 MHz,  $\text{CDCl}_3$ ):

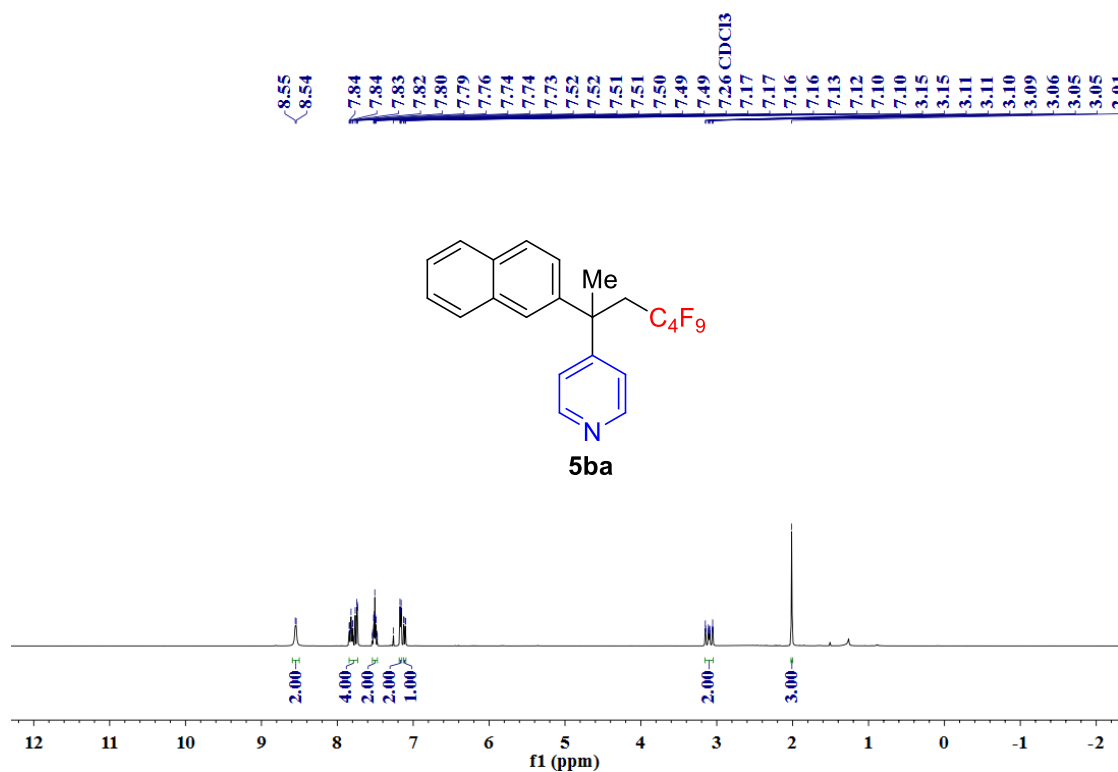

$^{13}\text{C}$  NMR (100 MHz,  $\text{CDCl}_3$ ):

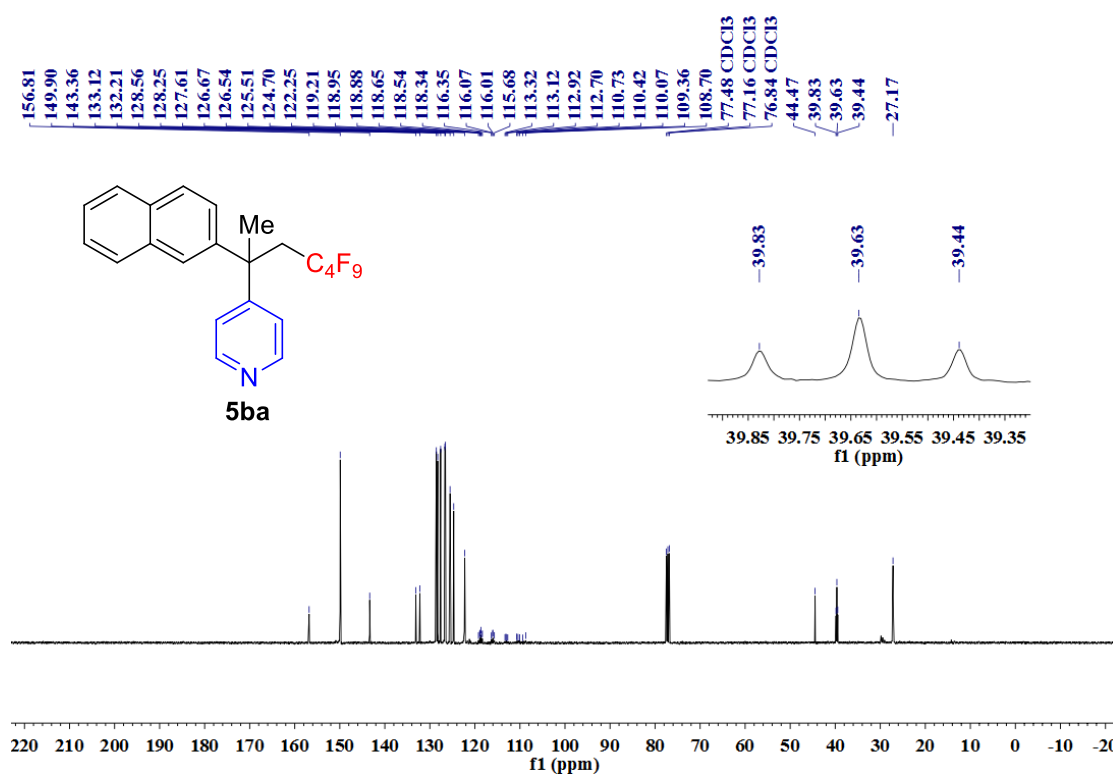

$^{19}\text{F}$  NMR (376 MHz,  $\text{CDCl}_3$ ):

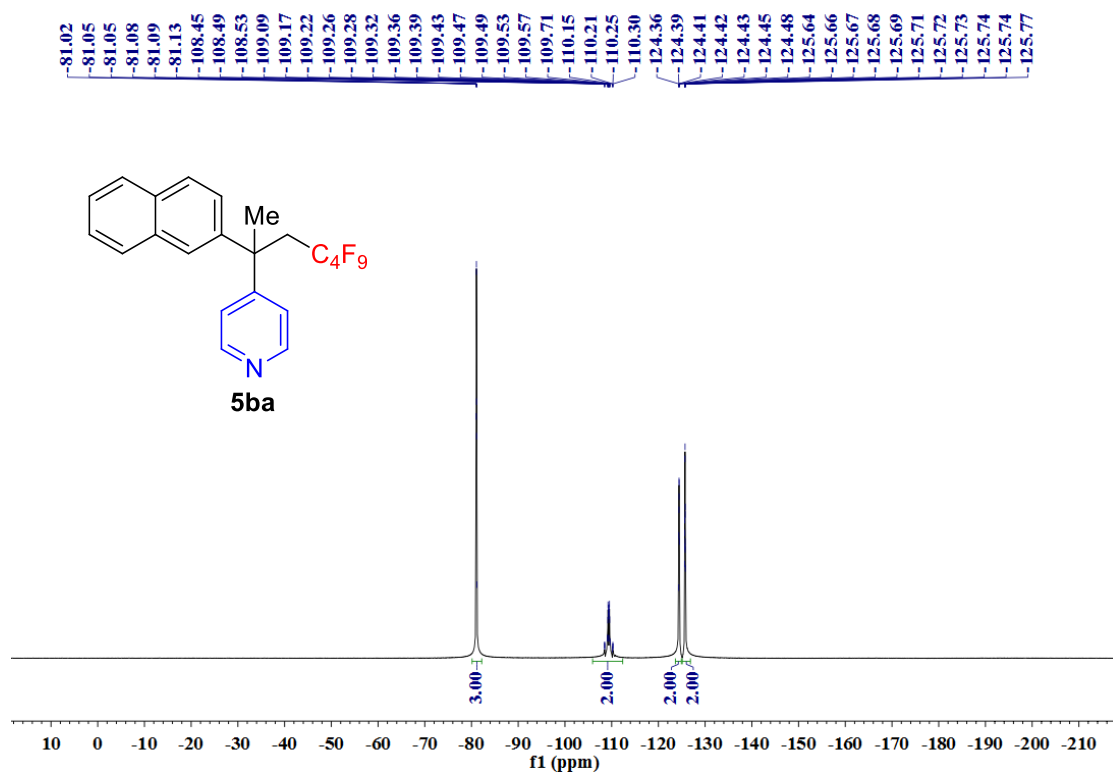

$^1\text{H}$  NMR (400 MHz,  $\text{CDCl}_3$ ):

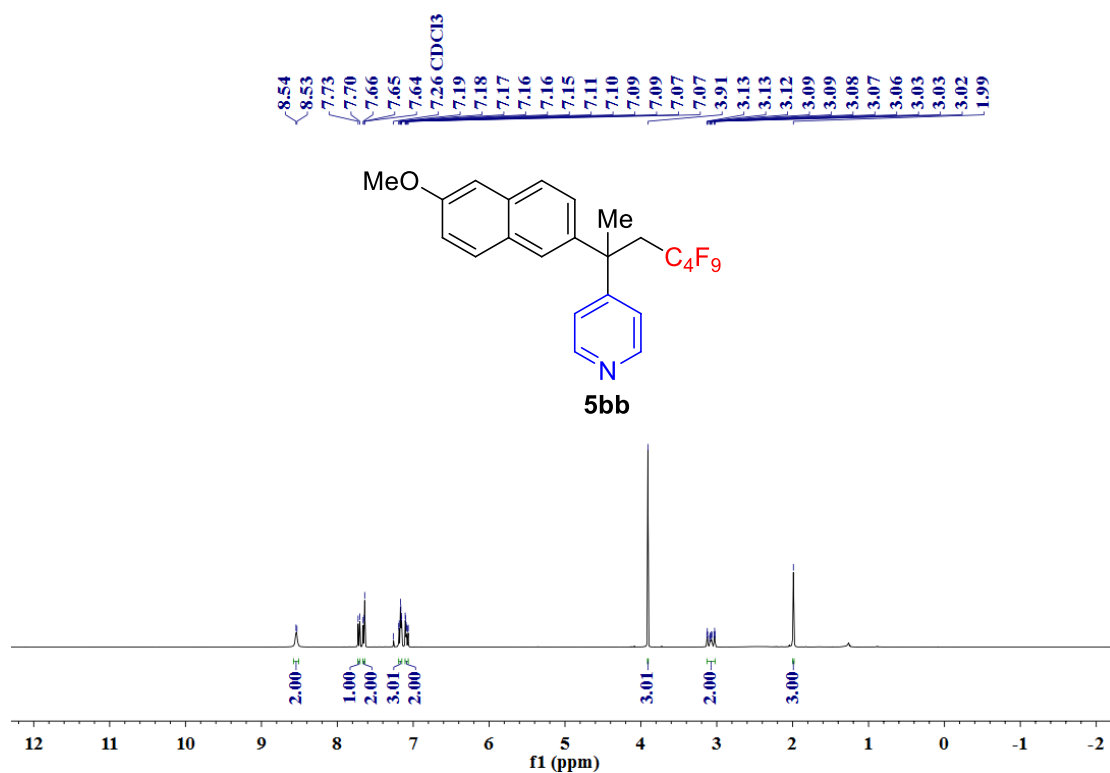

$^{13}\text{C}$  NMR (100 MHz,  $\text{CDCl}_3$ ):

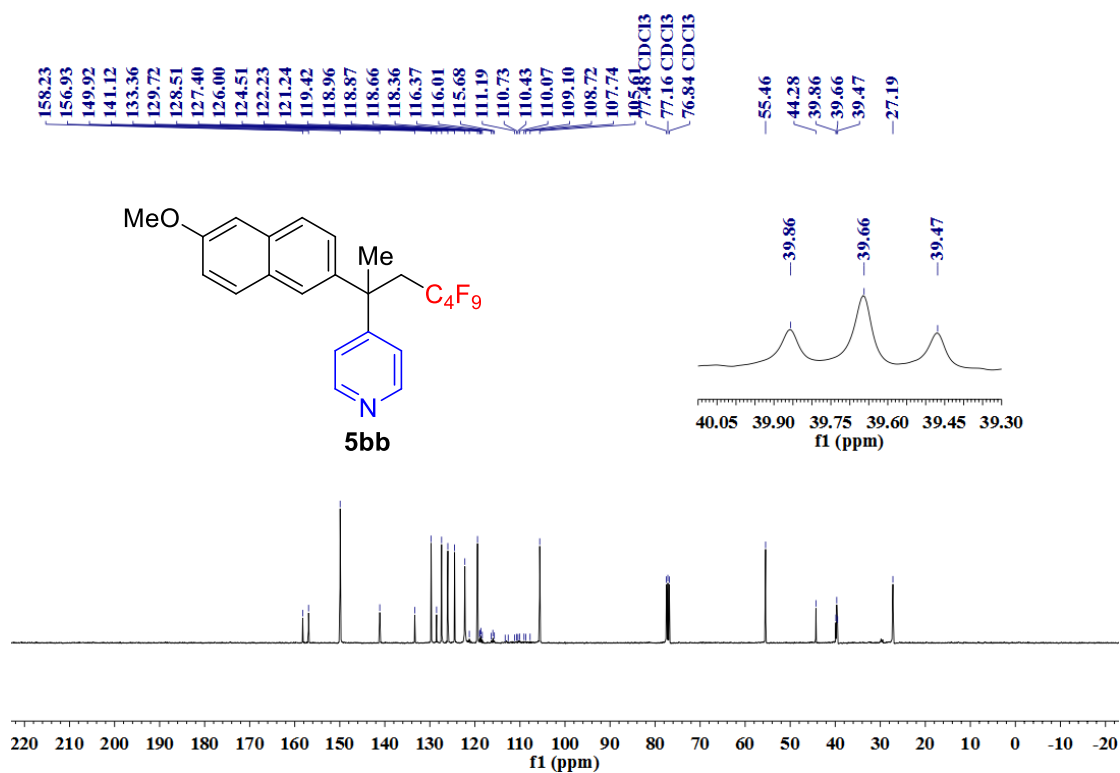



$^{19}\text{F}$  NMR (376 MHz,  $\text{CDCl}_3$ ):

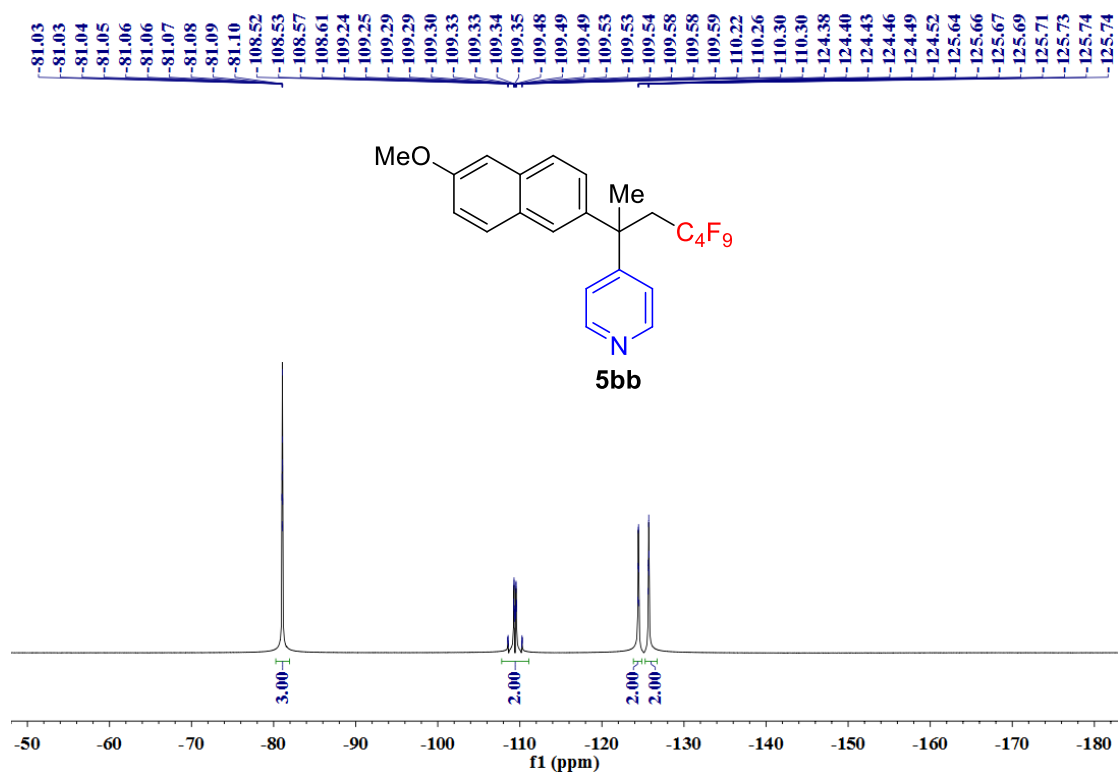

$^1\text{H}$  NMR (400 MHz,  $\text{CDCl}_3$ ):

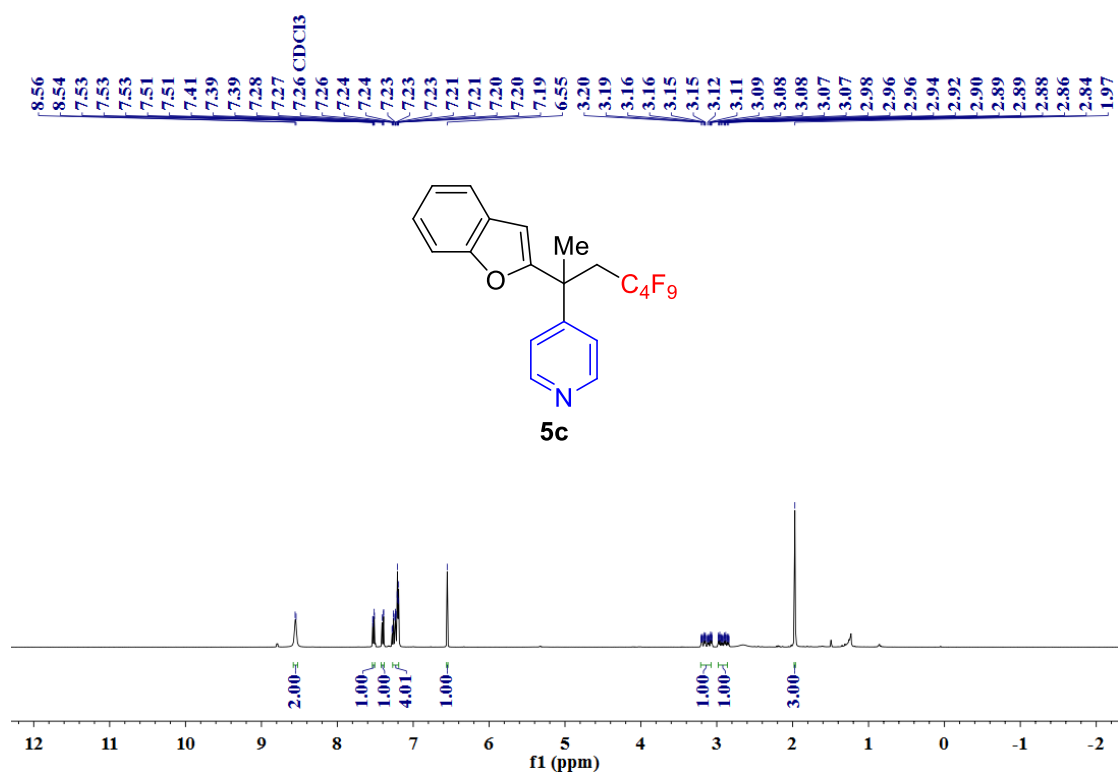

$^{13}\text{C}$  NMR (100 MHz,  $\text{CDCl}_3$ ):

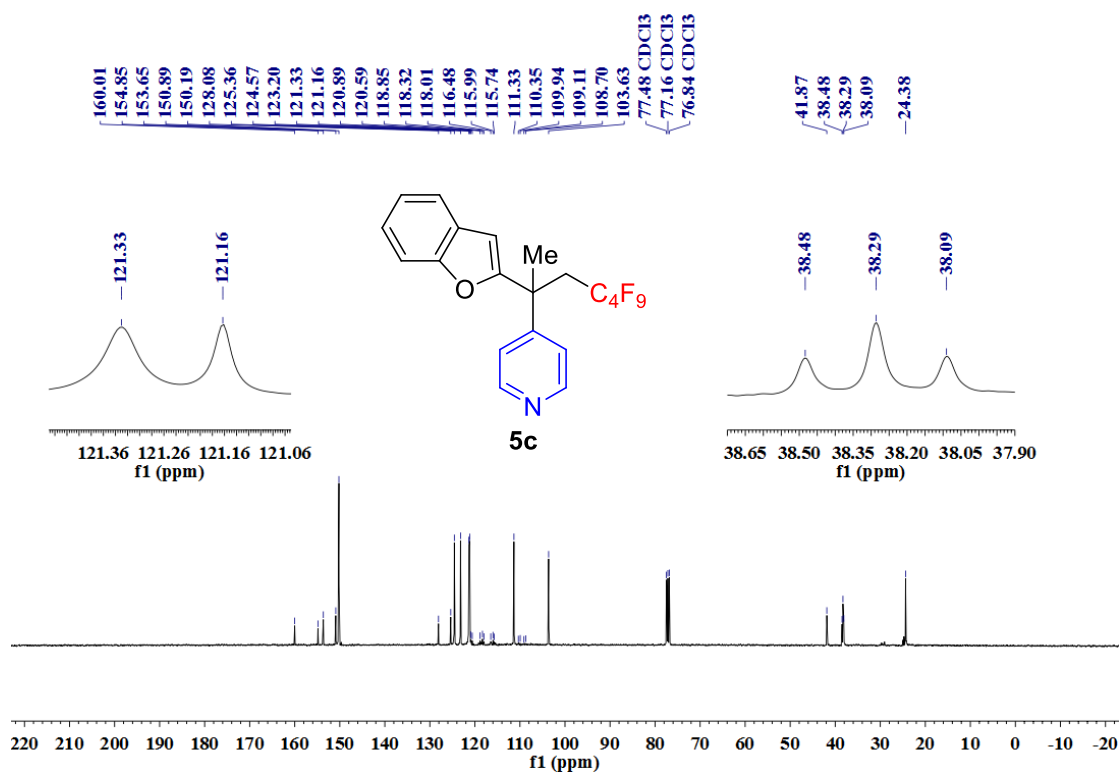

**<sup>19</sup>F NMR (376 MHz, CDCl<sub>3</sub>):**

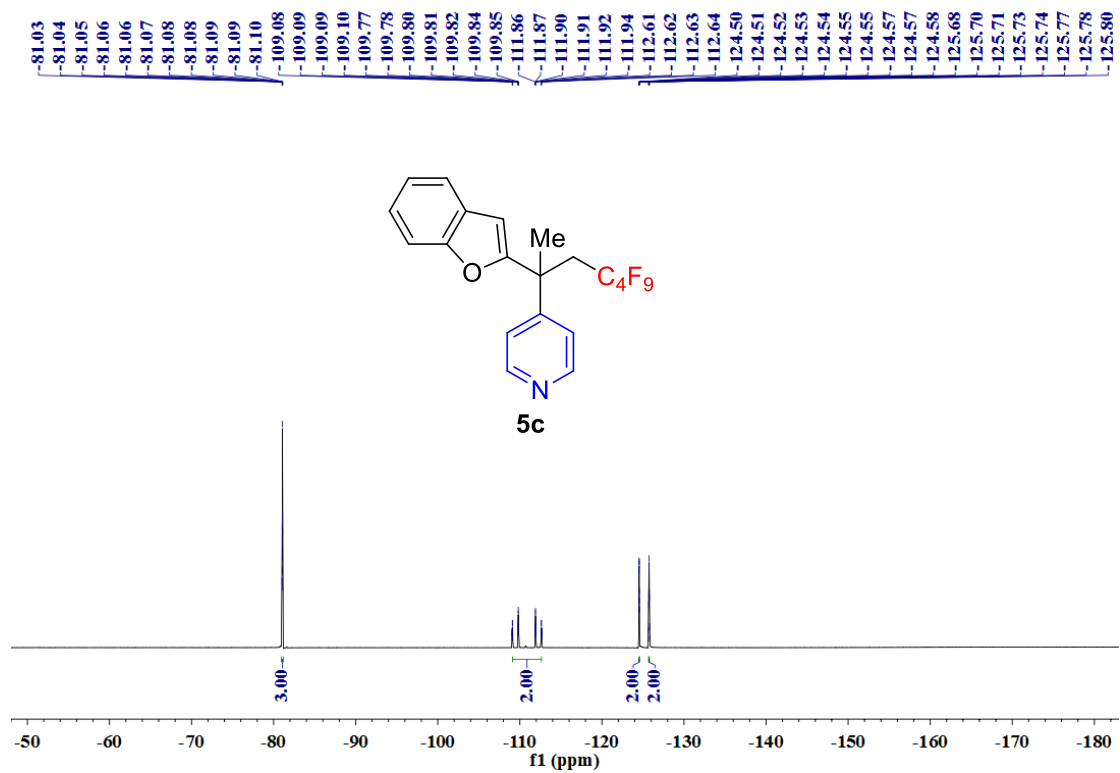

$^1\text{H}$  NMR (400 MHz,  $\text{CDCl}_3$ ):

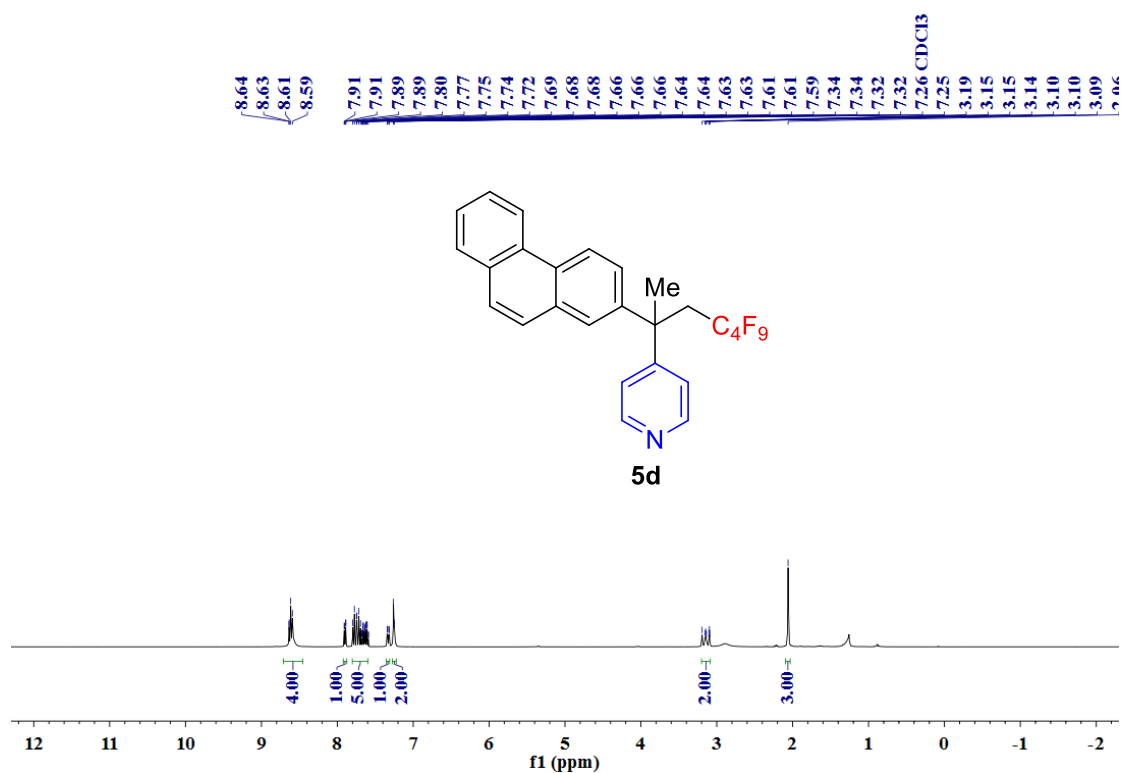

$^{13}\text{C}$  NMR (100 MHz,  $\text{CDCl}_3$ ):

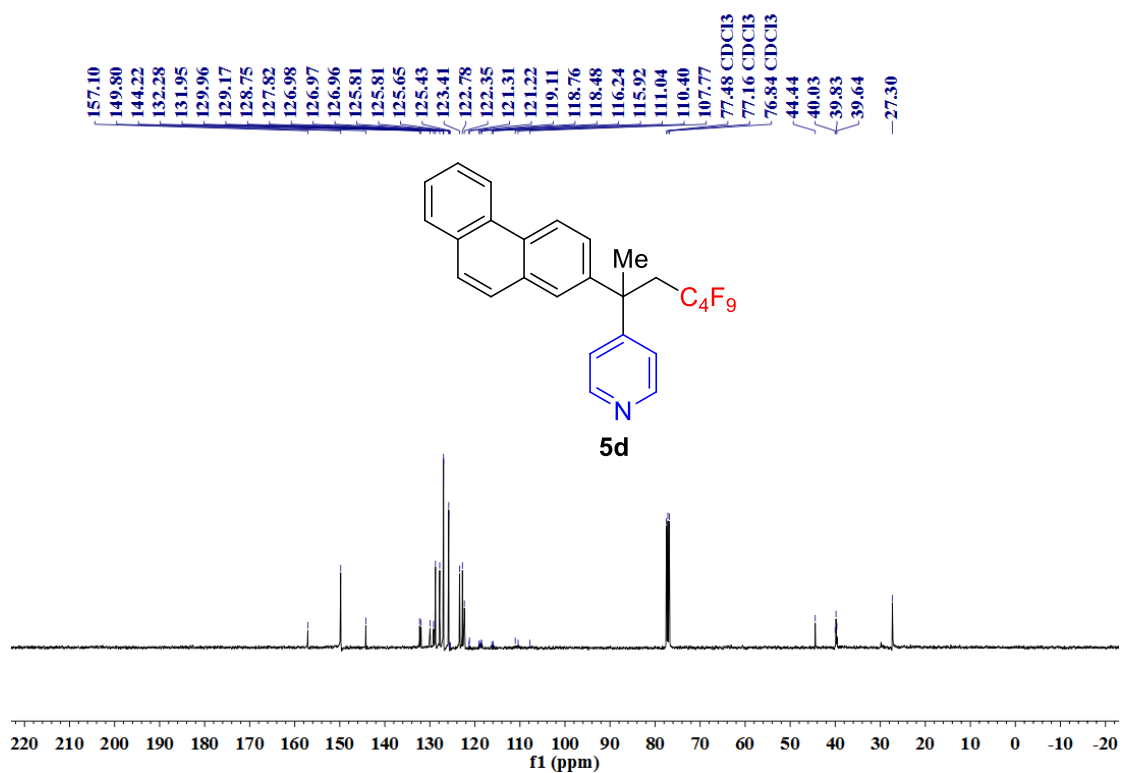

$^{19}\text{F}$  NMR (376 MHz,  $\text{CDCl}_3$ ):

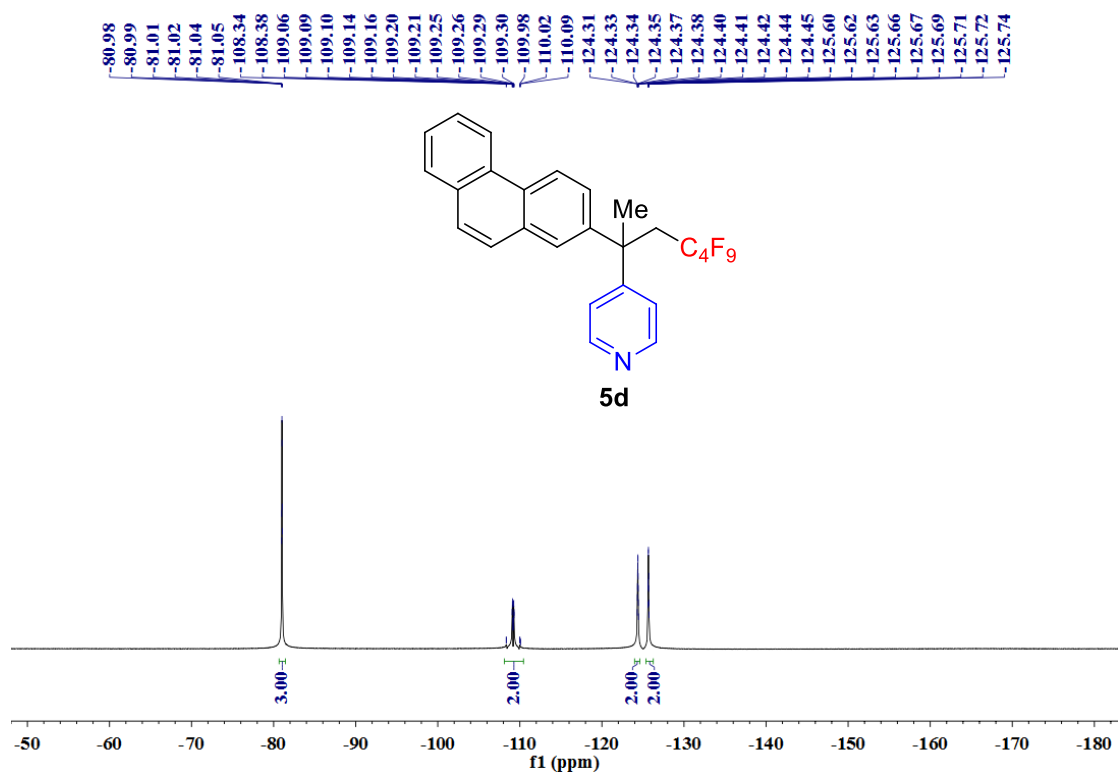

$^1\text{H}$  NMR (400 MHz,  $\text{CDCl}_3$ ):

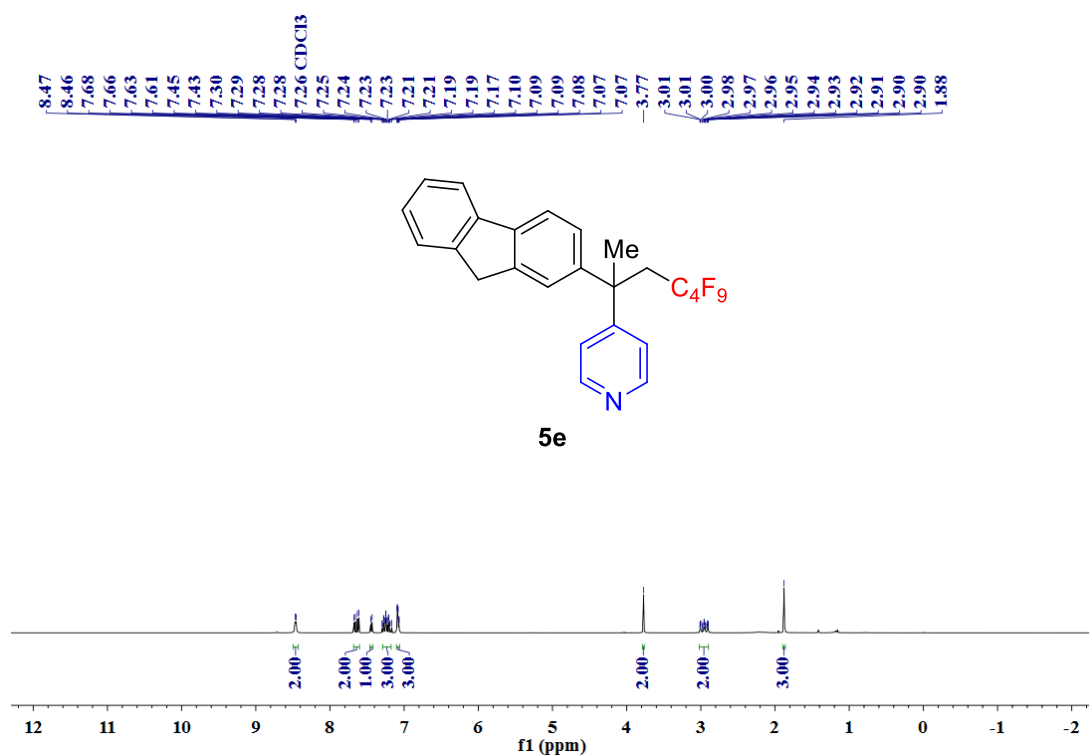

$^{13}\text{C}$  NMR (100 MHz,  $\text{CDCl}_3$ ):

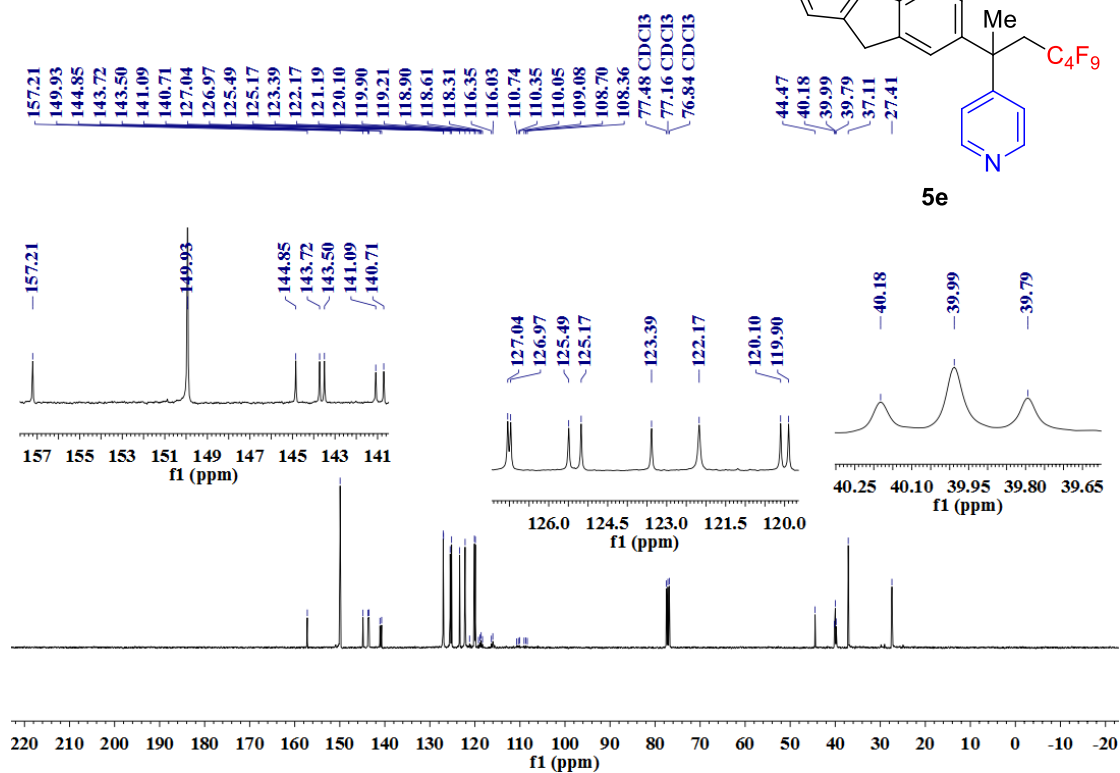

$^{19}\text{F}$  NMR (376 MHz,  $\text{CDCl}_3$ ):

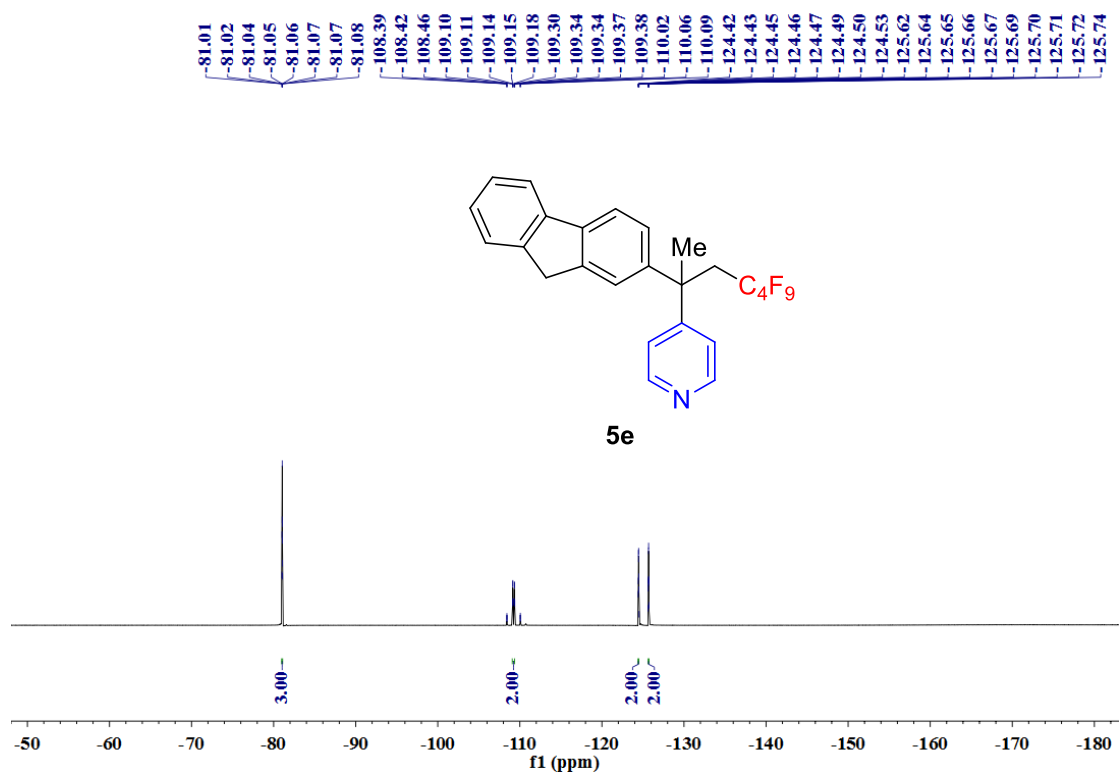

$^1\text{H}$  NMR (400 MHz,  $\text{CDCl}_3$ ):

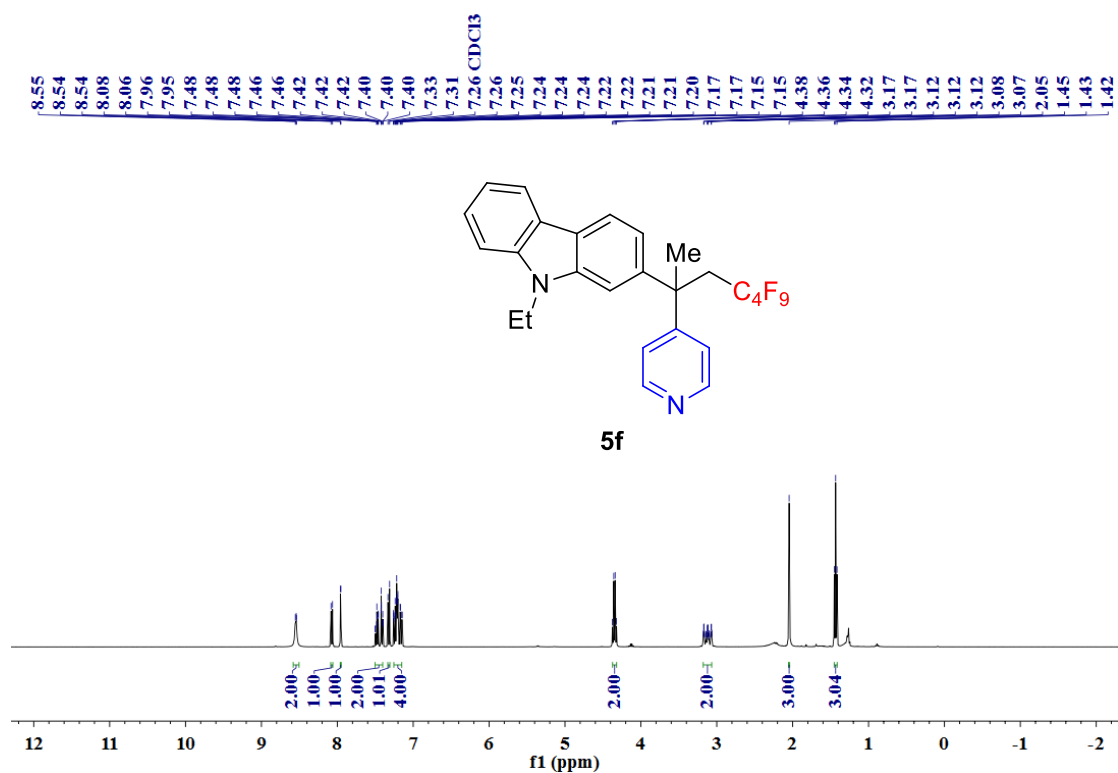

$^{13}\text{C}$  NMR (100 MHz,  $\text{CDCl}_3$ ):

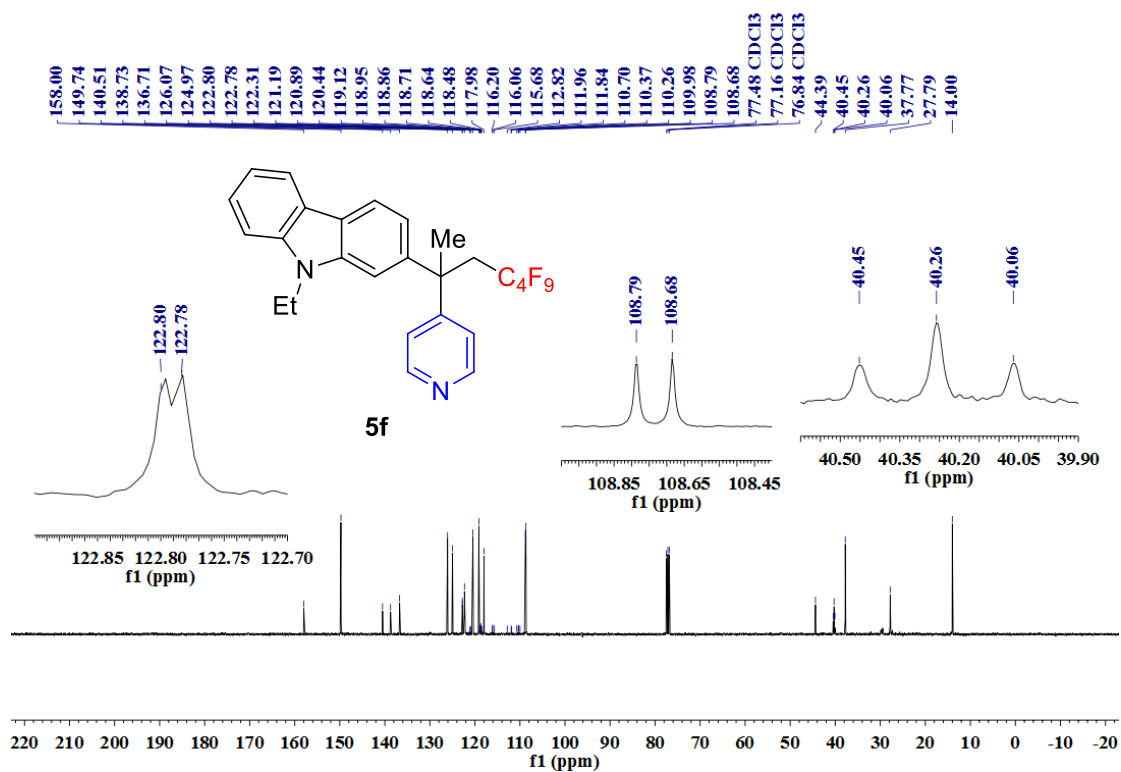

$^{19}\text{F}$  NMR (376 MHz,  $\text{CDCl}_3$ ):

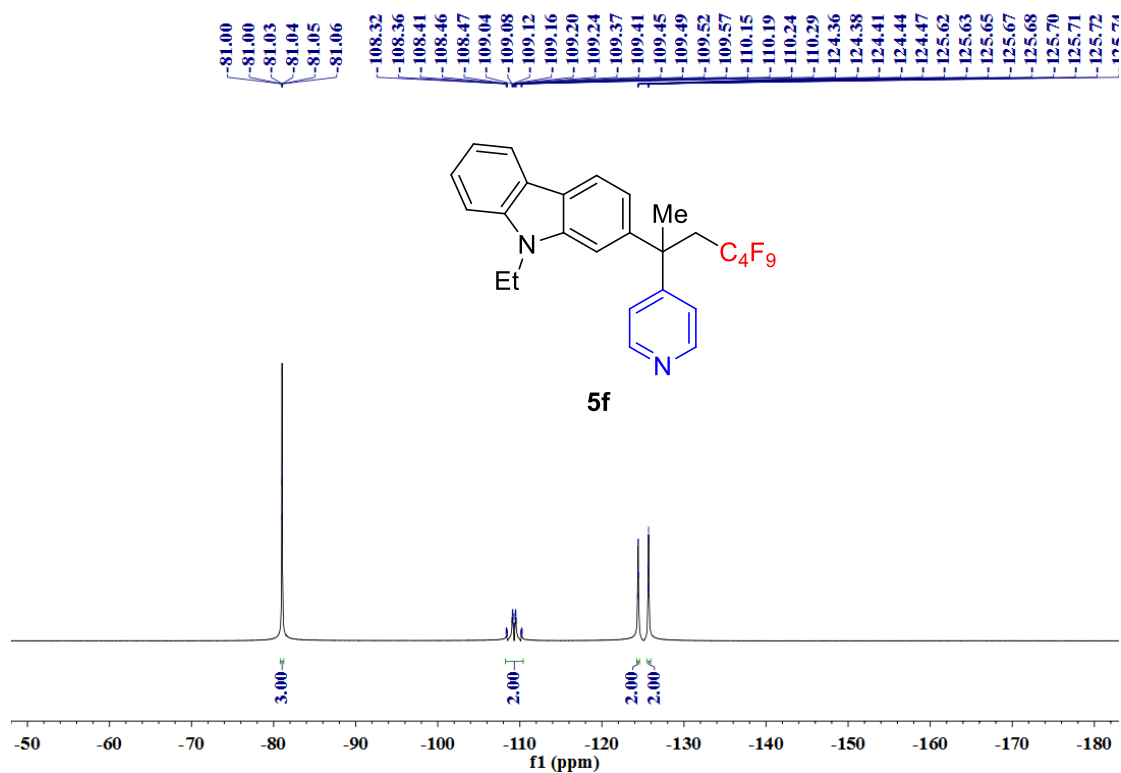

$^1\text{H}$  NMR (400 MHz,  $\text{CDCl}_3$ ):

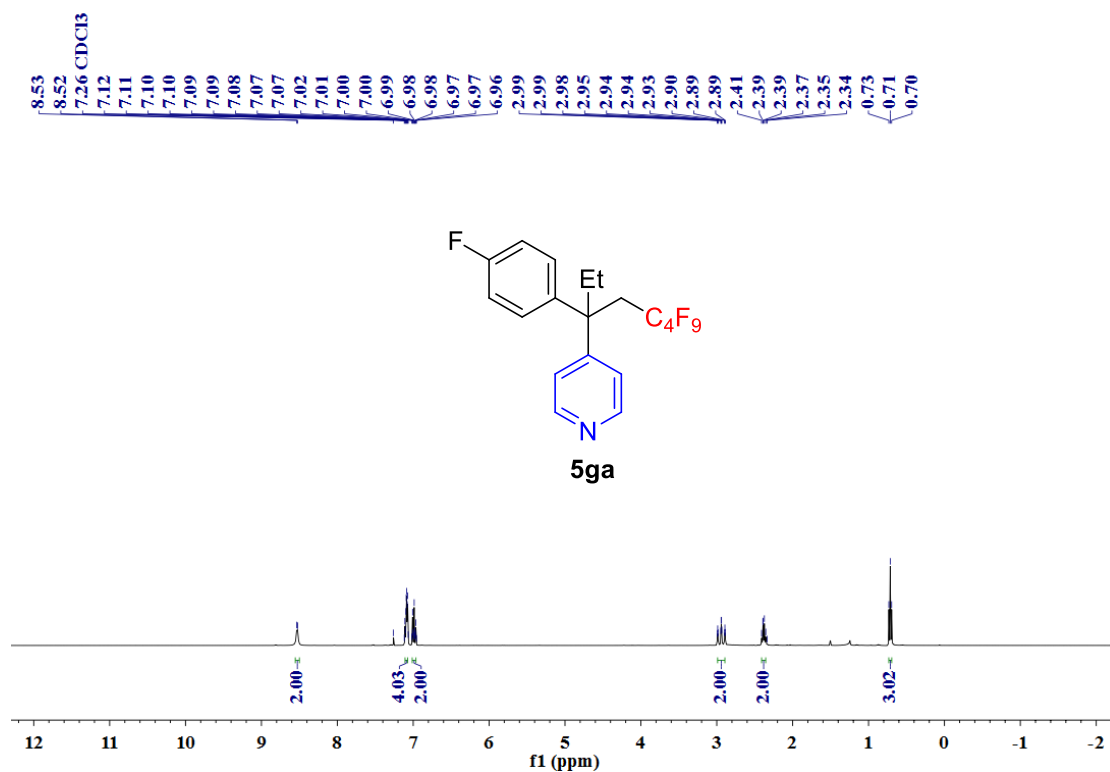

$^{13}\text{C}$  NMR (100 MHz,  $\text{CDCl}_3$ ):

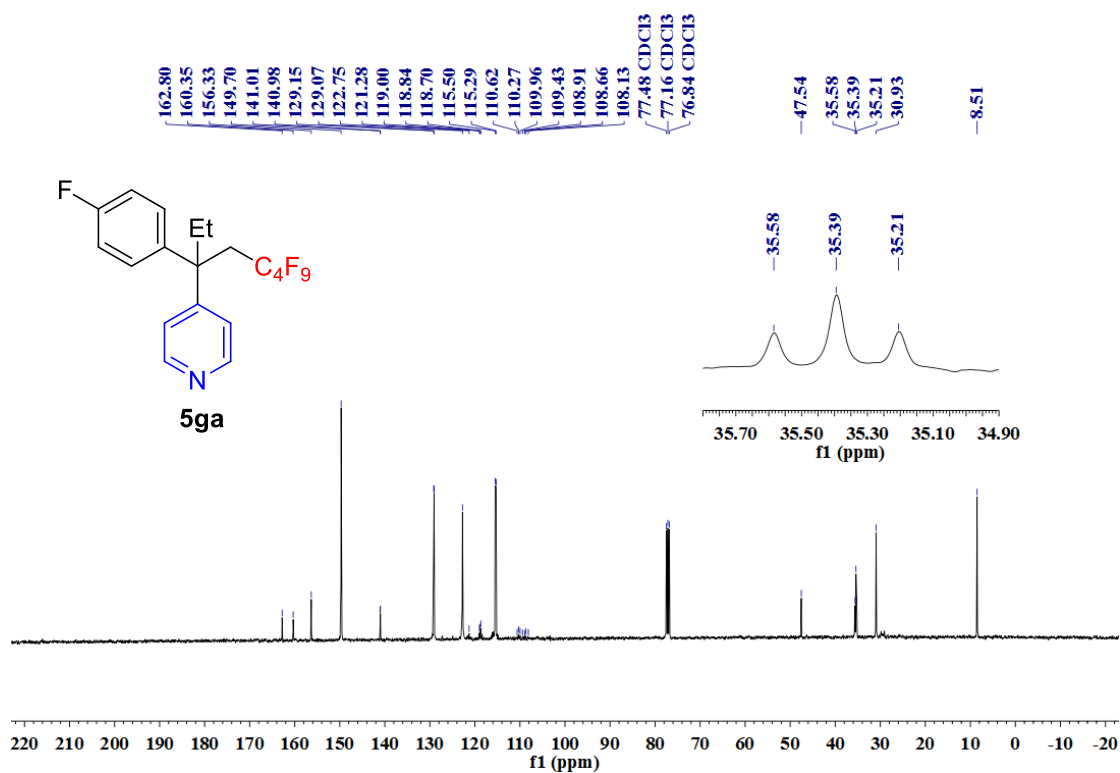

$^{19}\text{F}$  NMR (376 MHz,  $\text{CDCl}_3$ ):

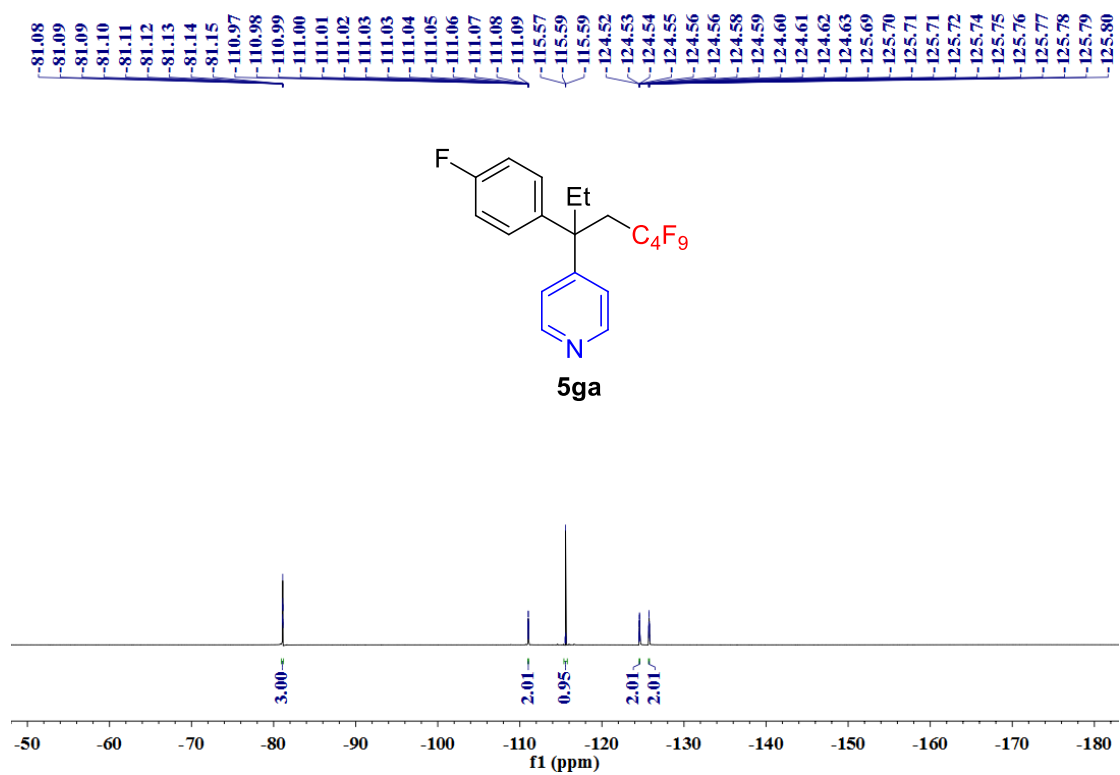



$^1\text{H}$  NMR (400 MHz,  $\text{CDCl}_3$ ):

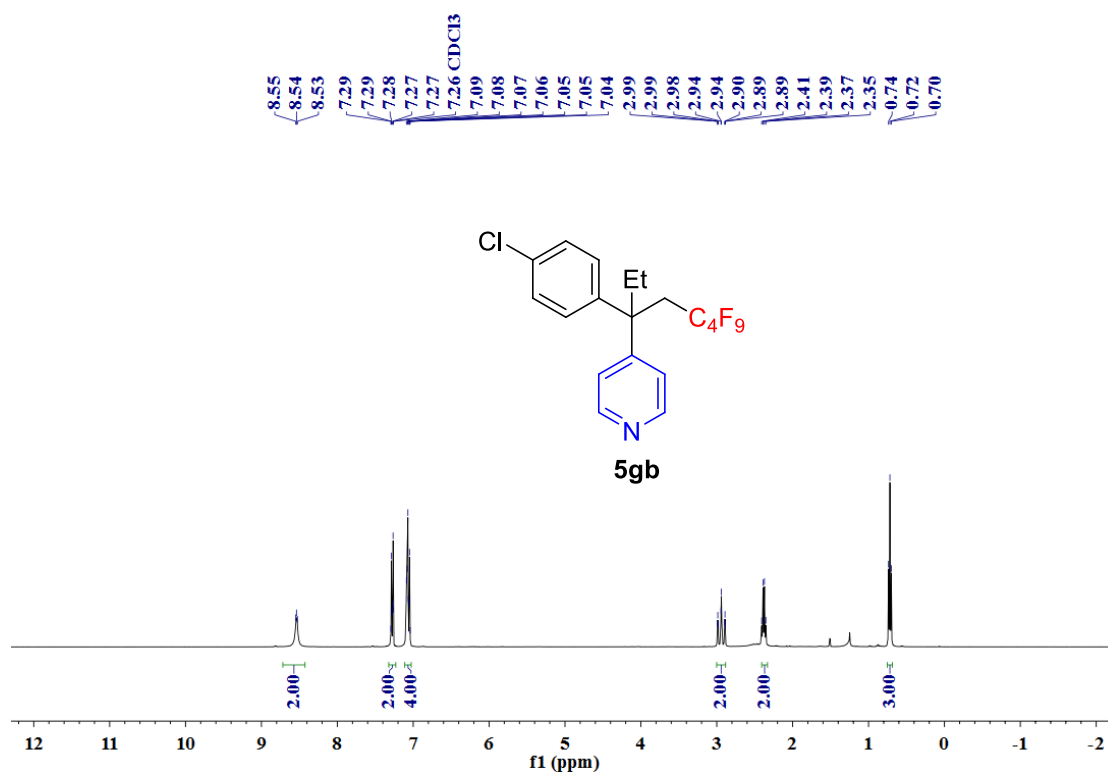

$^{13}\text{C}$  NMR (100 MHz,  $\text{CDCl}_3$ ):

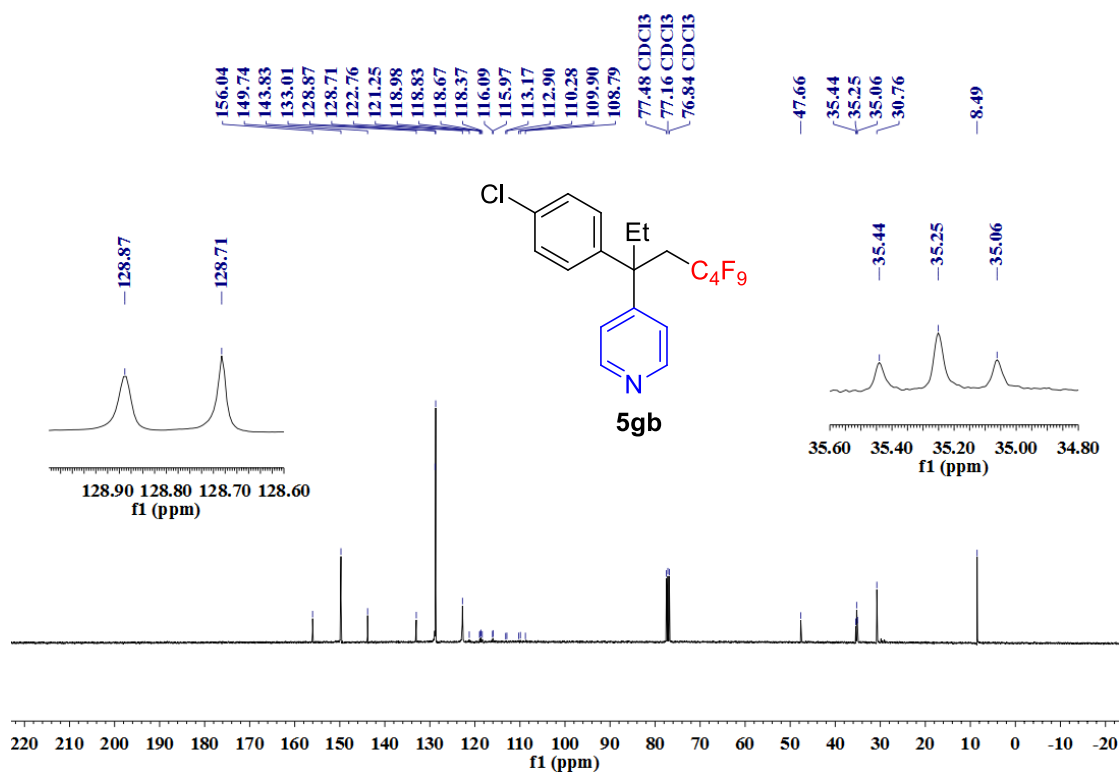

$^{19}\text{F}$  NMR (376 MHz,  $\text{CDCl}_3$ ):

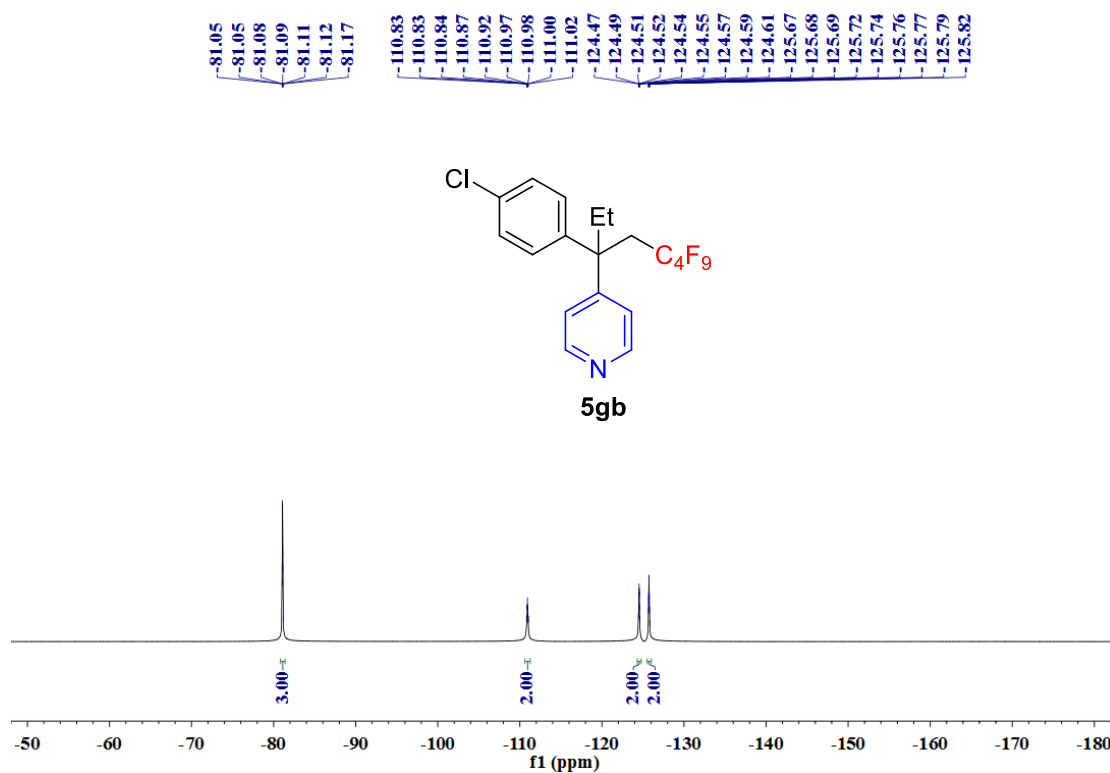

$^1\text{H}$  NMR (400 MHz,  $\text{CDCl}_3$ ):

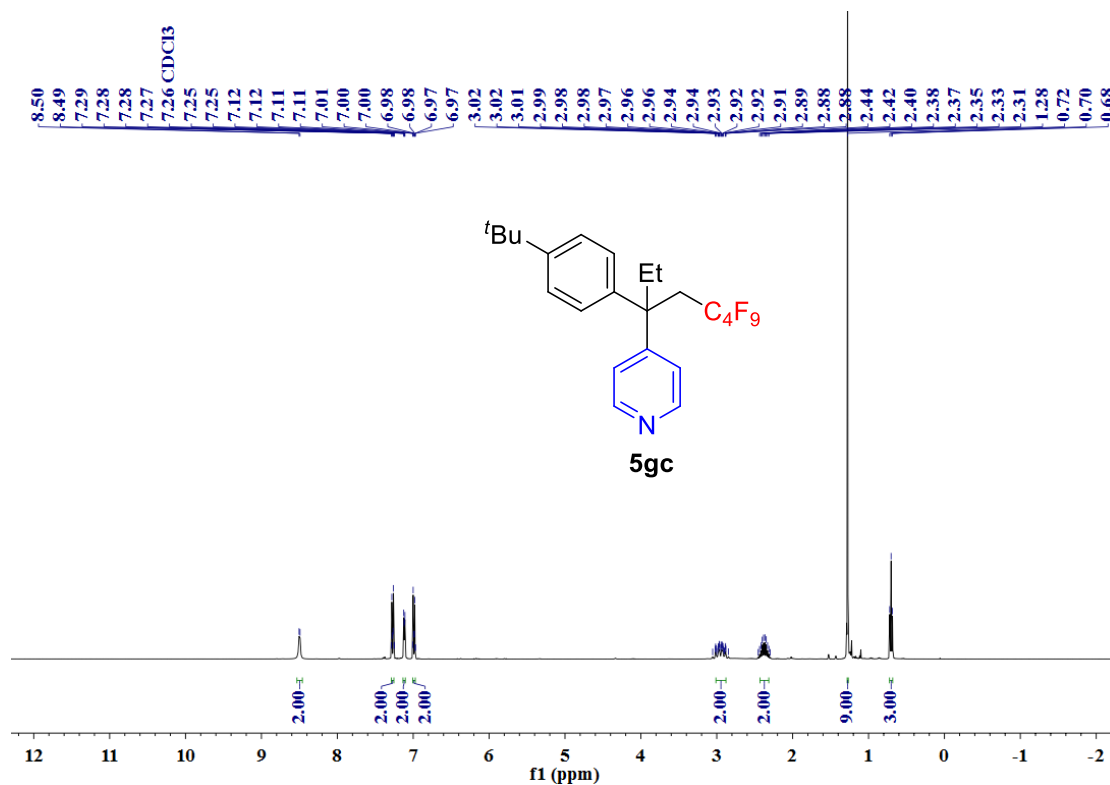

$^{13}\text{C}$  NMR (100 MHz,  $\text{CDCl}_3$ ):

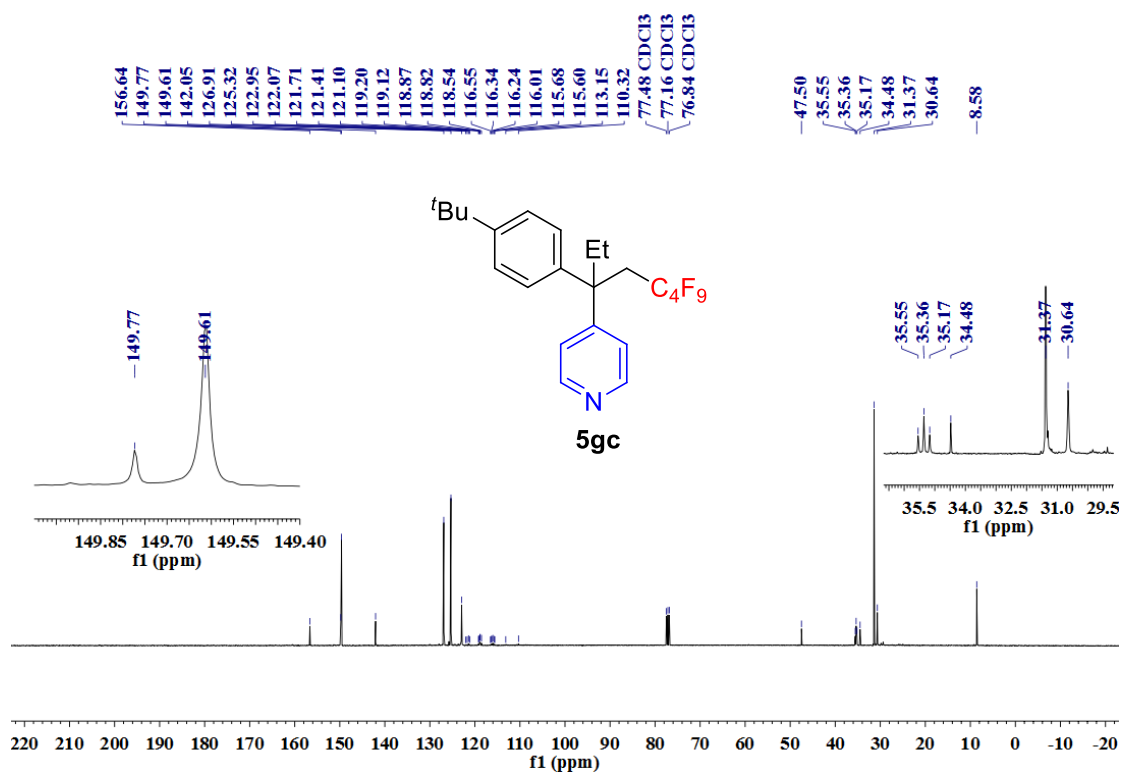

$^{19}\text{F}$  NMR (376 MHz,  $\text{CDCl}_3$ ):

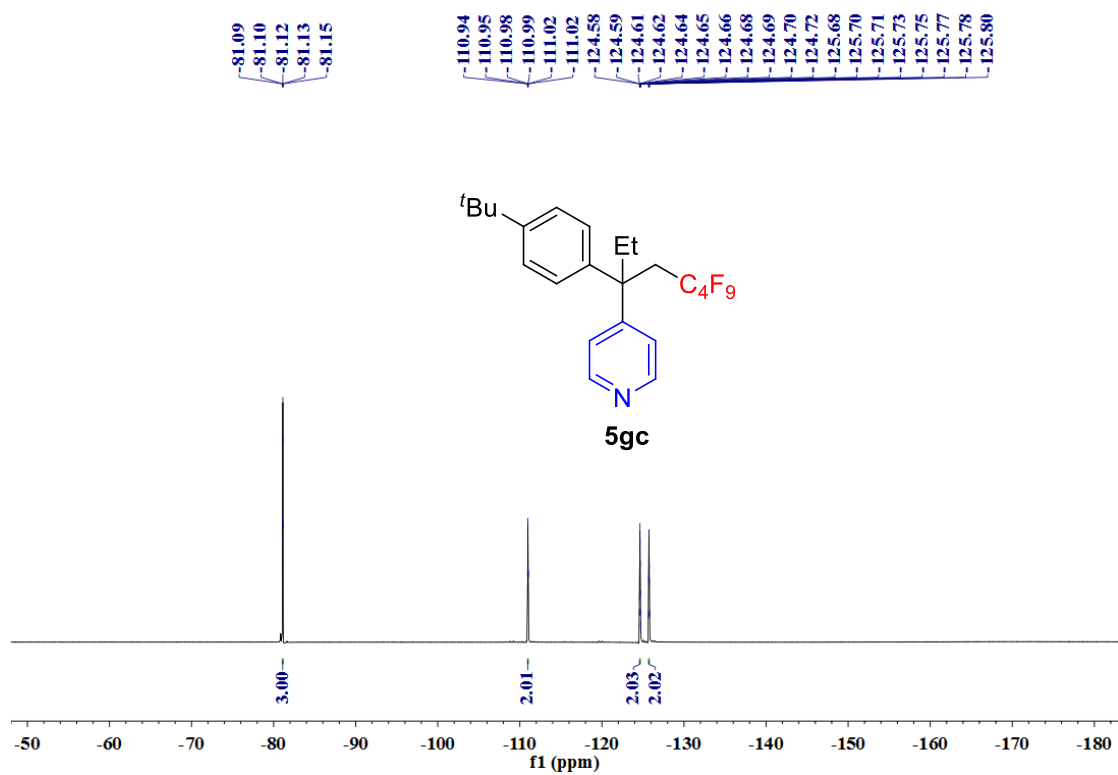

$^1\text{H}$  NMR (400 MHz,  $\text{CDCl}_3$ ):

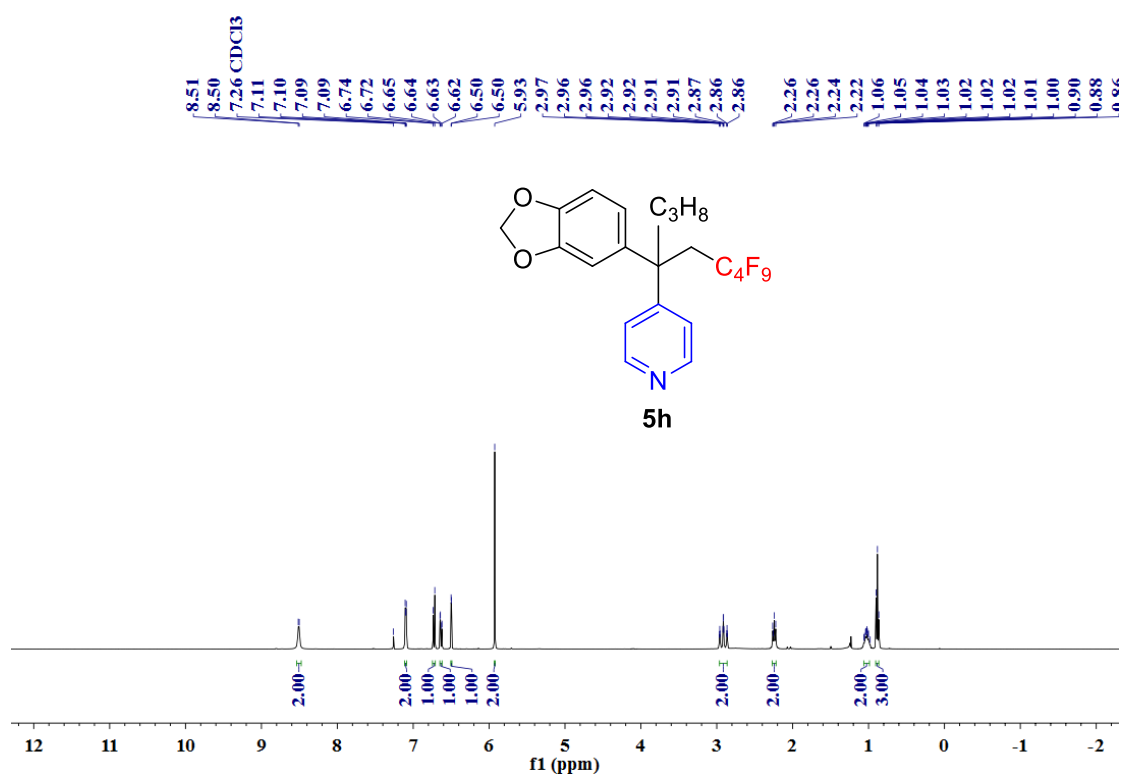

$^{13}\text{C}$  NMR (100 MHz,  $\text{CDCl}_3$ ):

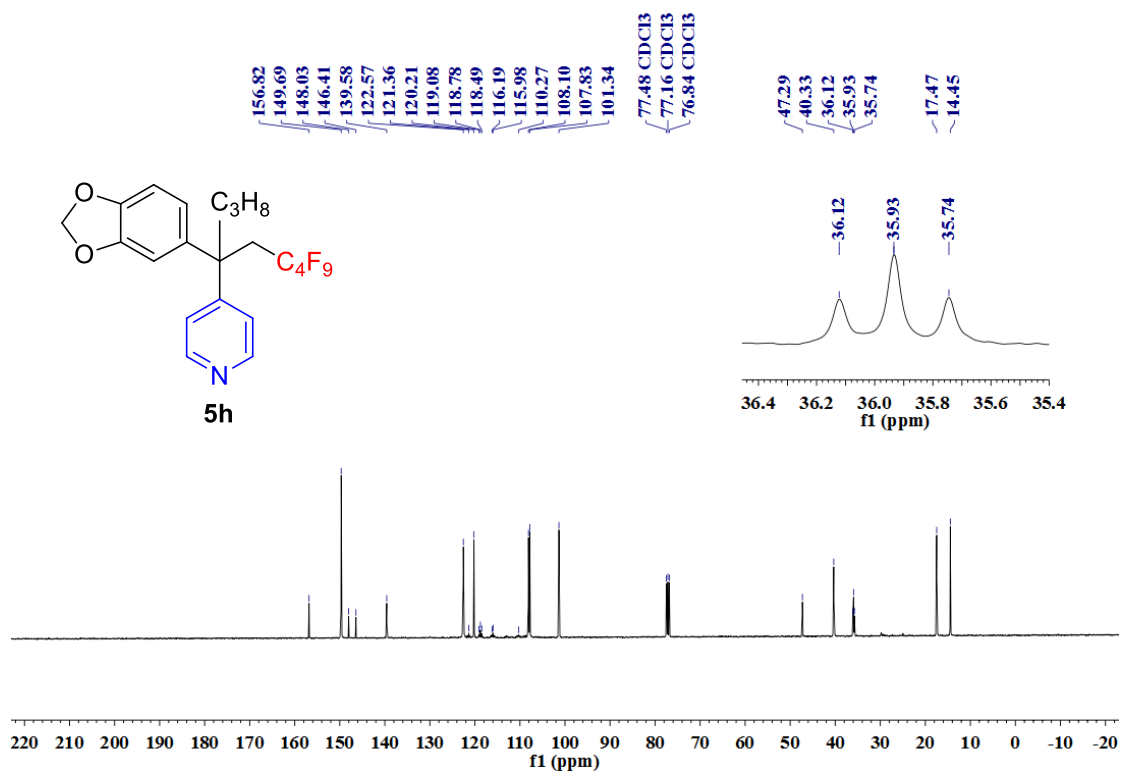

$^{19}\text{F}$  NMR (376 MHz,  $\text{CDCl}_3$ ):

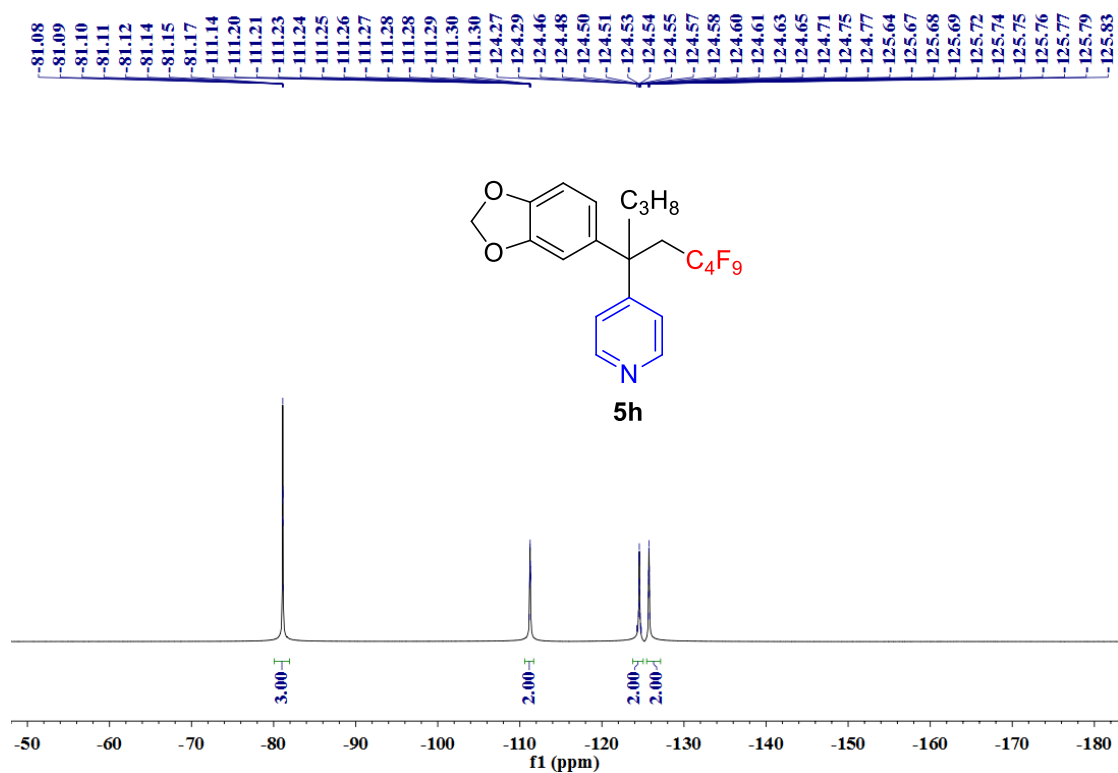

$^1\text{H}$  NMR (400 MHz,  $\text{CDCl}_3$ ):

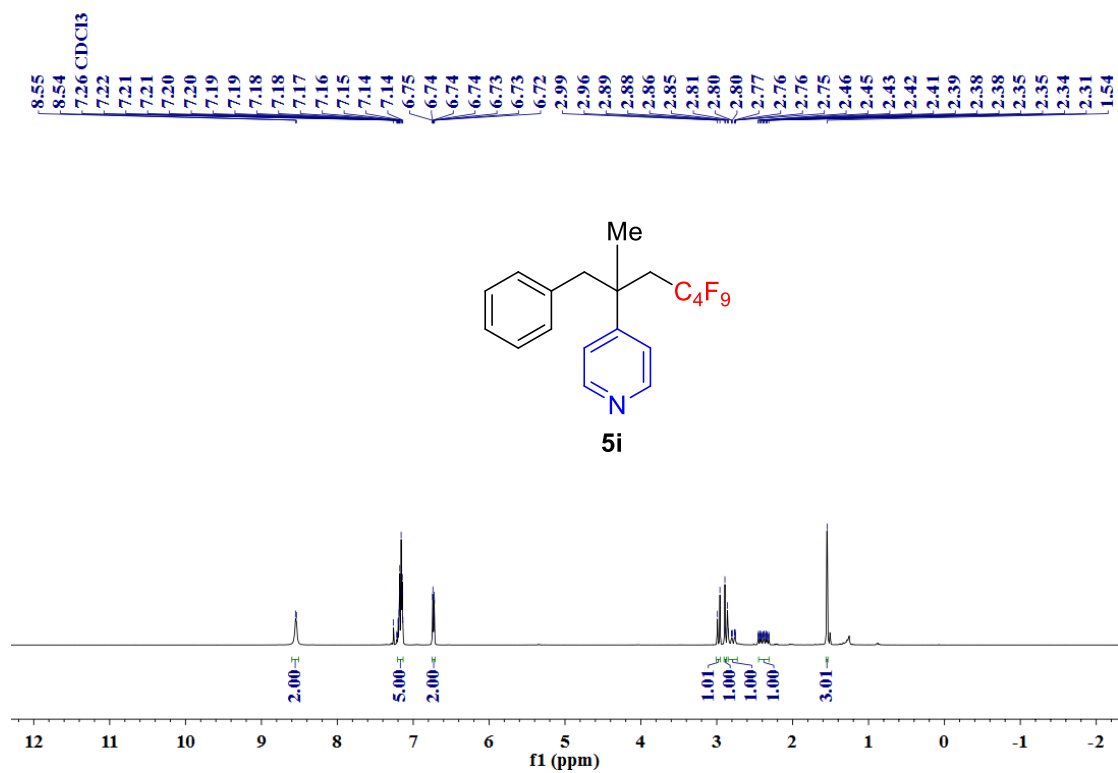

$^{13}\text{C}$  NMR (100 MHz,  $\text{CDCl}_3$ ):

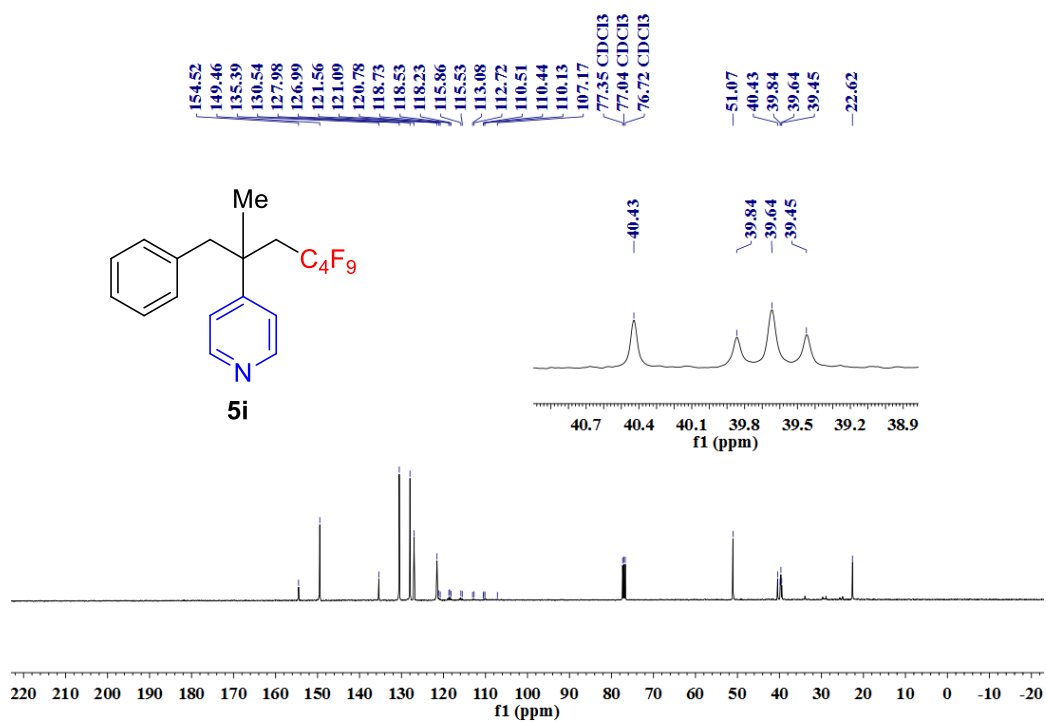

$^{19}\text{F}$  NMR (376 MHz,  $\text{CDCl}_3$ ):

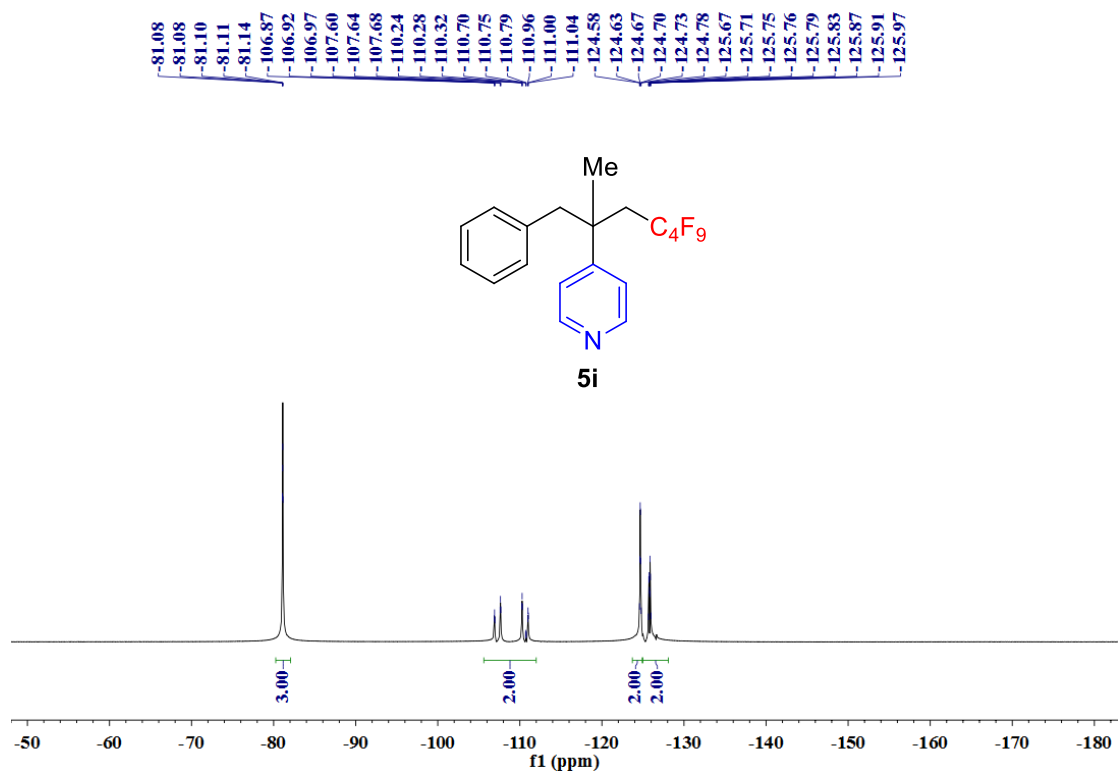

$^1\text{H}$  NMR (400 MHz,  $\text{CDCl}_3$ ):

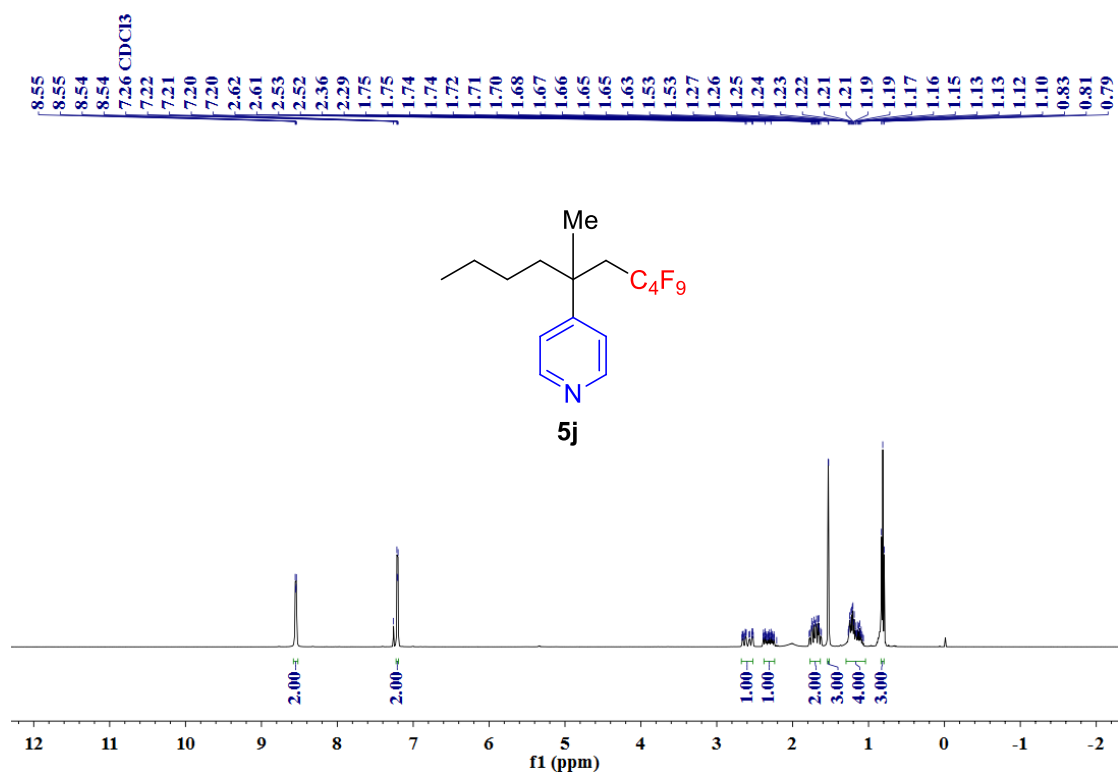

$^{13}\text{C}$  NMR (100 MHz,  $\text{CDCl}_3$ ):

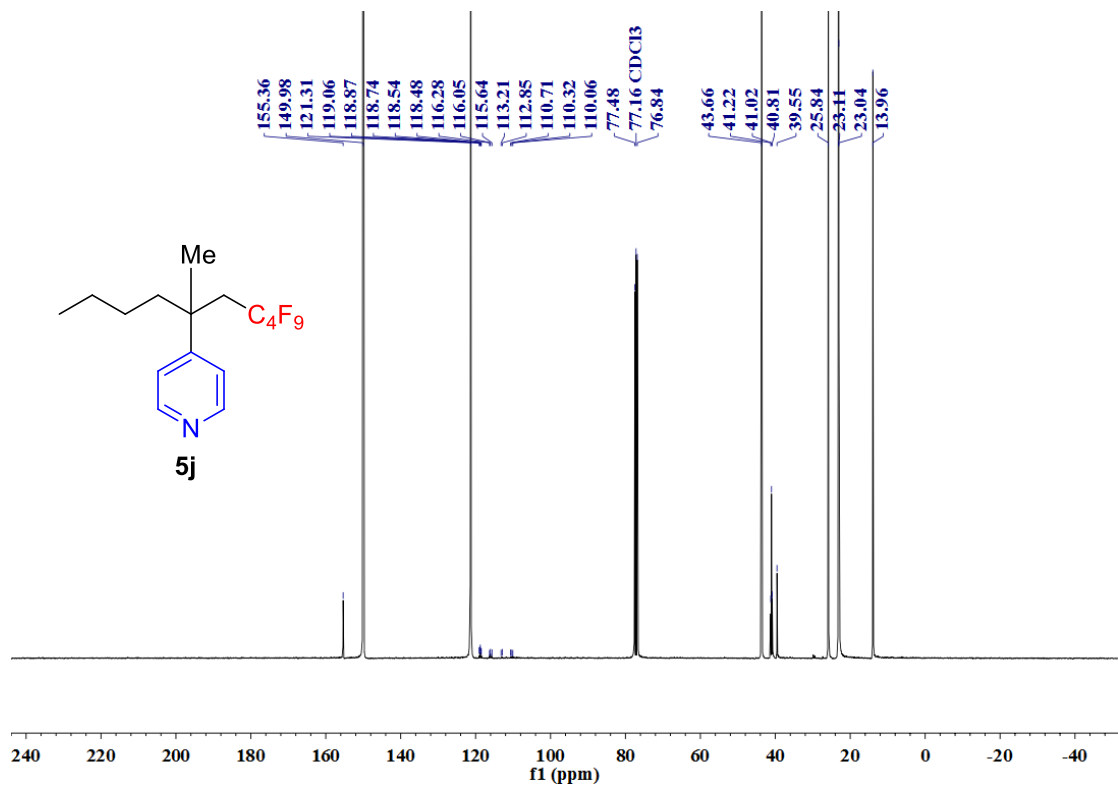

$^{19}\text{F}$  NMR (376 MHz,  $\text{CDCl}_3$ ):

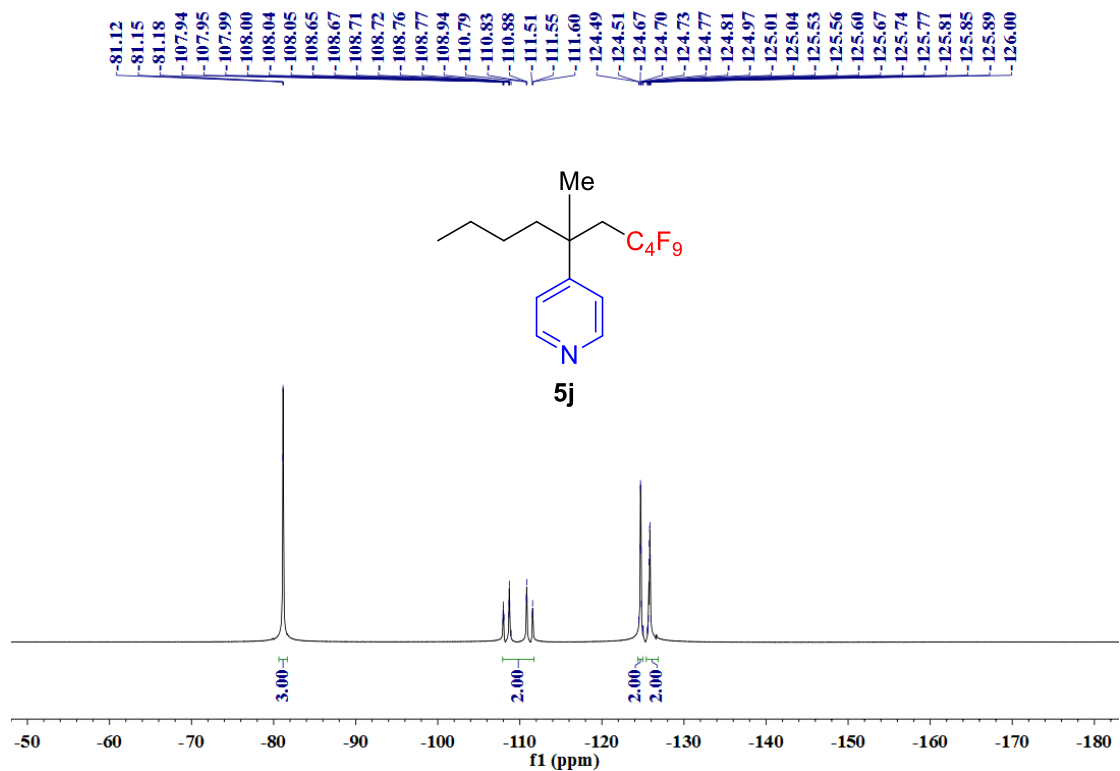

$^1\text{H}$  NMR (400 MHz,  $\text{CDCl}_3$ ):

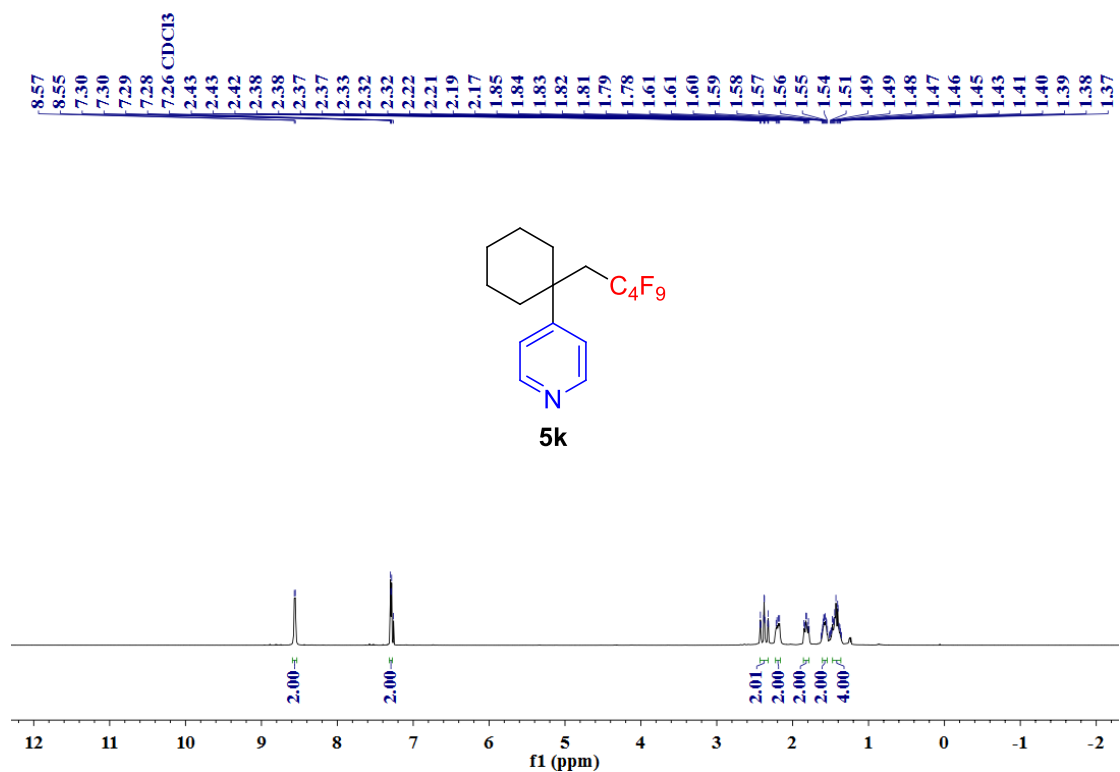



$^{13}\text{C}$  NMR (100 MHz,  $\text{CDCl}_3$ ):

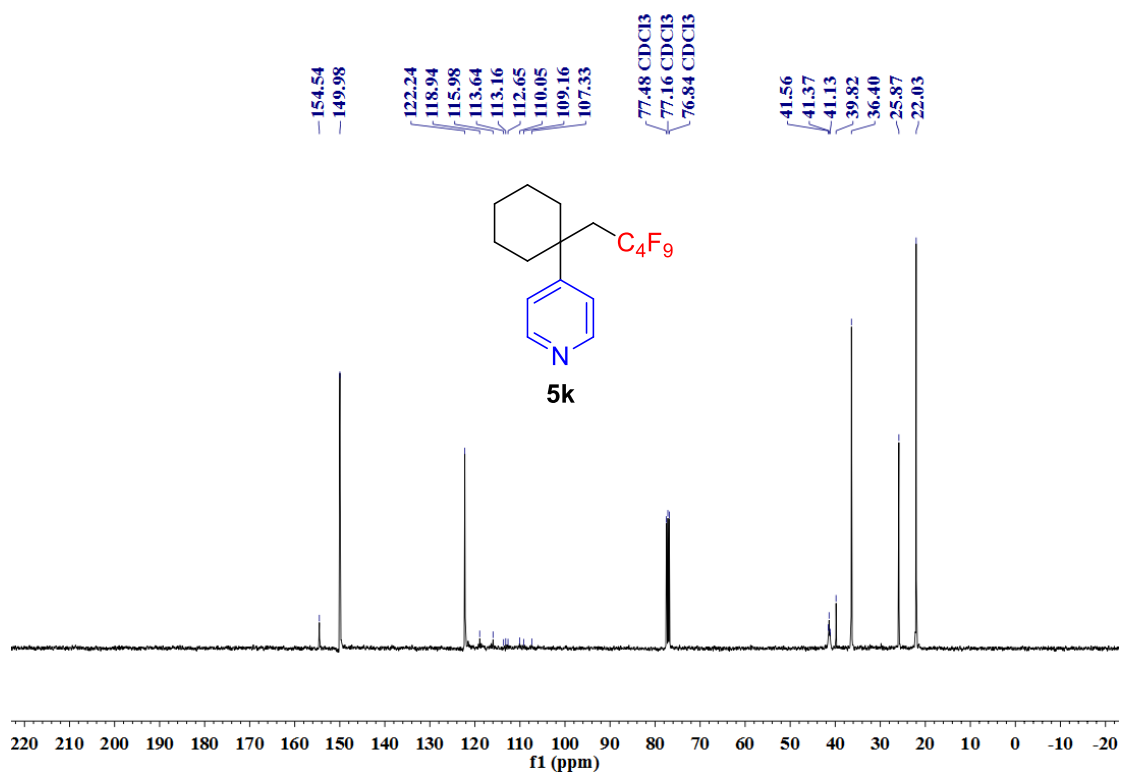

$^{19}\text{F}$  NMR (376 MHz,  $\text{CDCl}_3$ ):

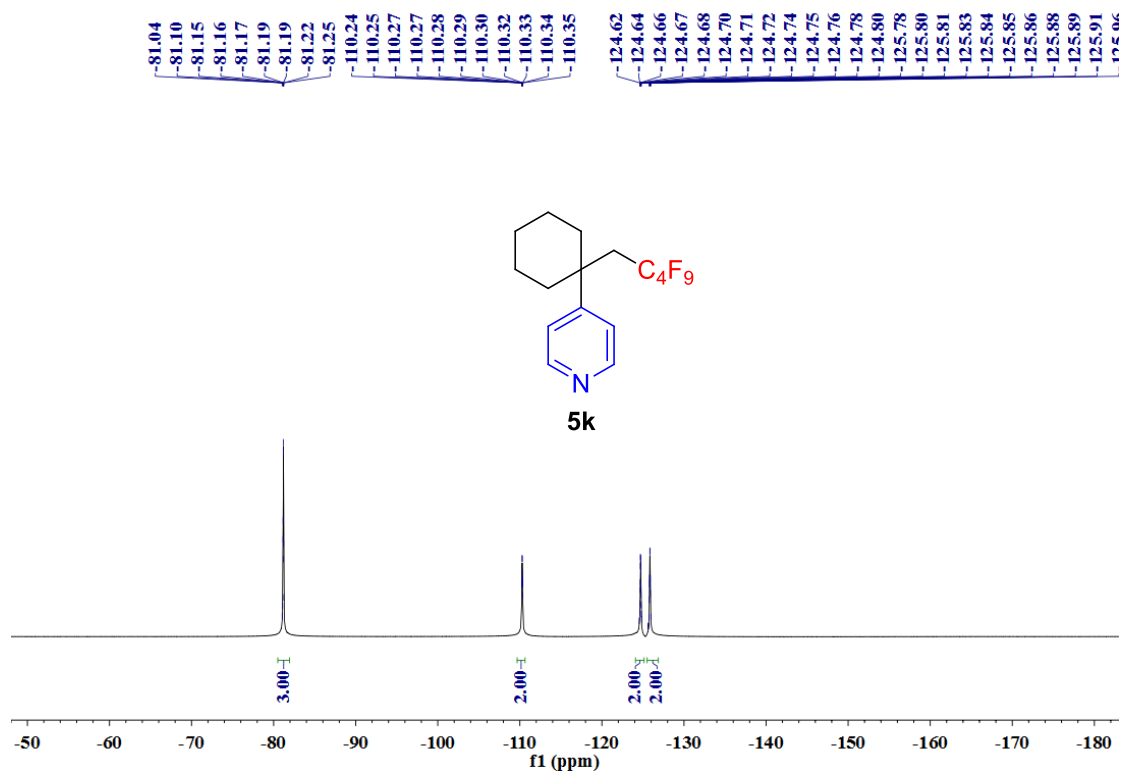

$^1\text{H}$  NMR (400 MHz,  $\text{CDCl}_3$ ):

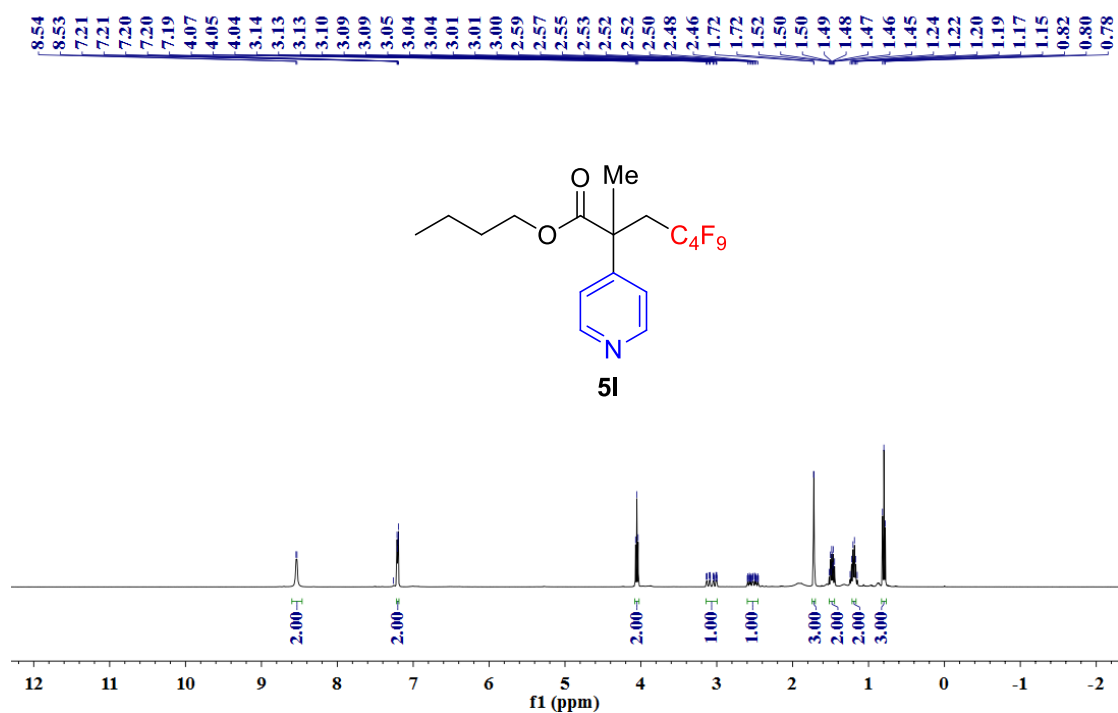

$^{13}\text{C}$  NMR (100 MHz,  $\text{CDCl}_3$ ):

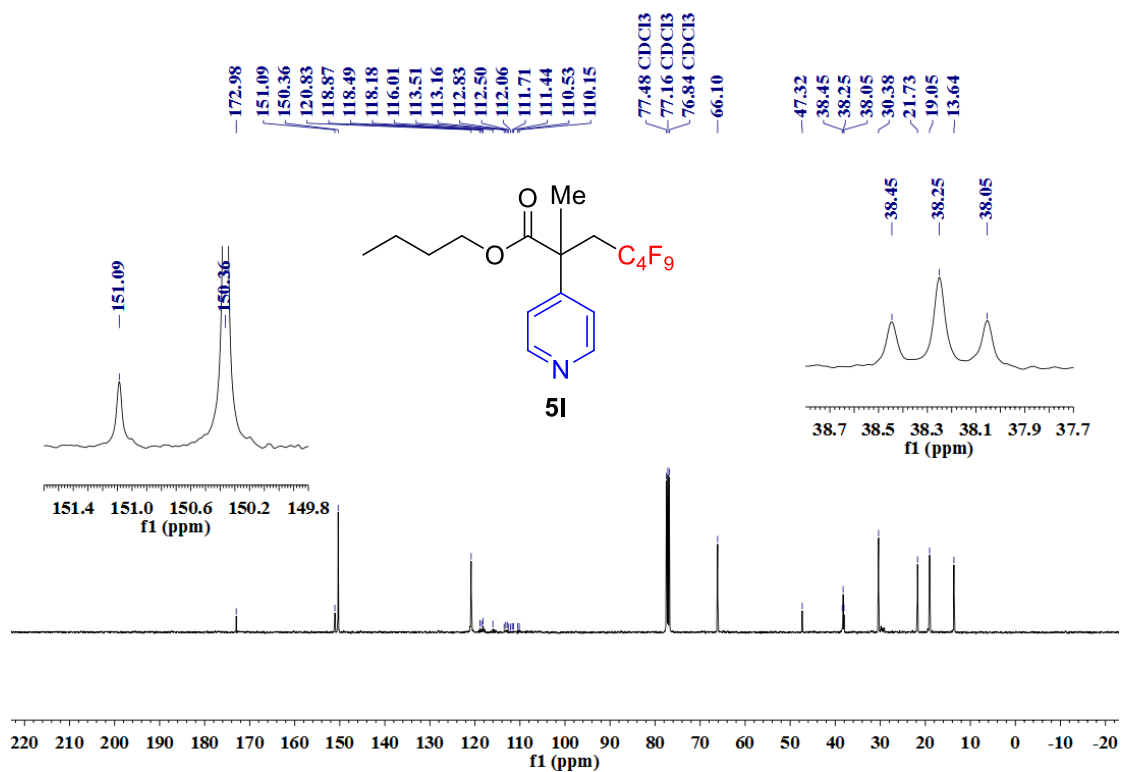

$^{19}\text{F}$  NMR (376 MHz,  $\text{CDCl}_3$ ):

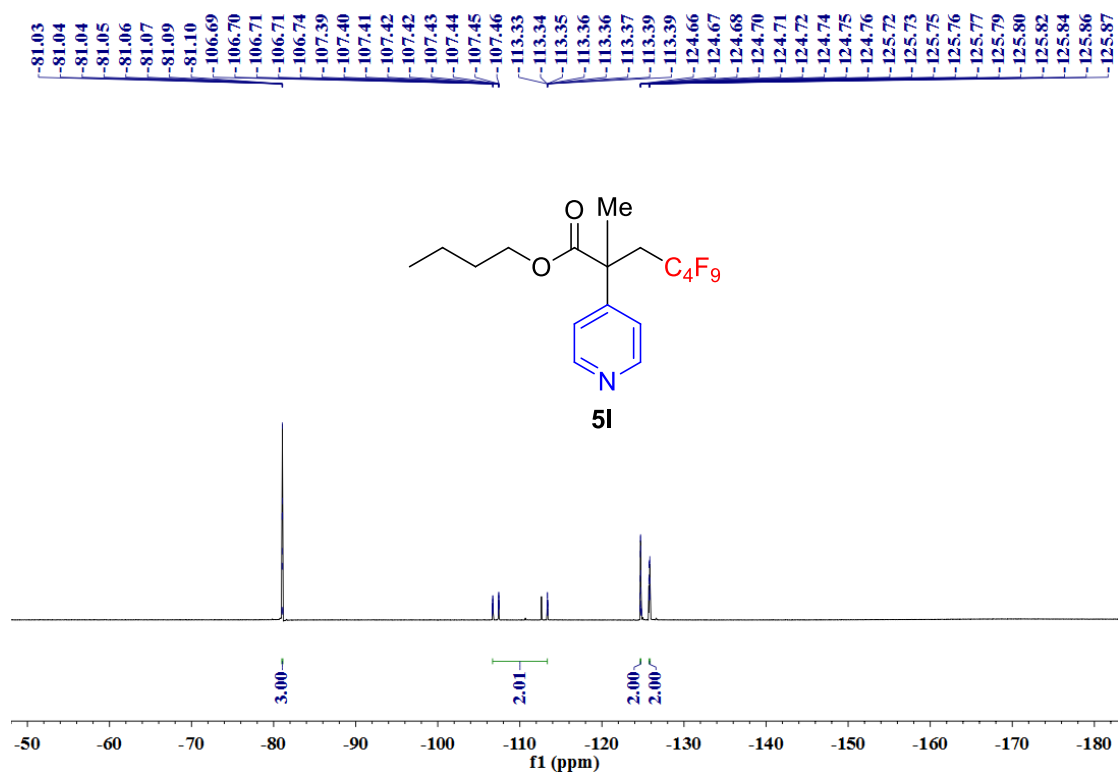

$^1\text{H}$  NMR (400 MHz,  $\text{CDCl}_3$ ):

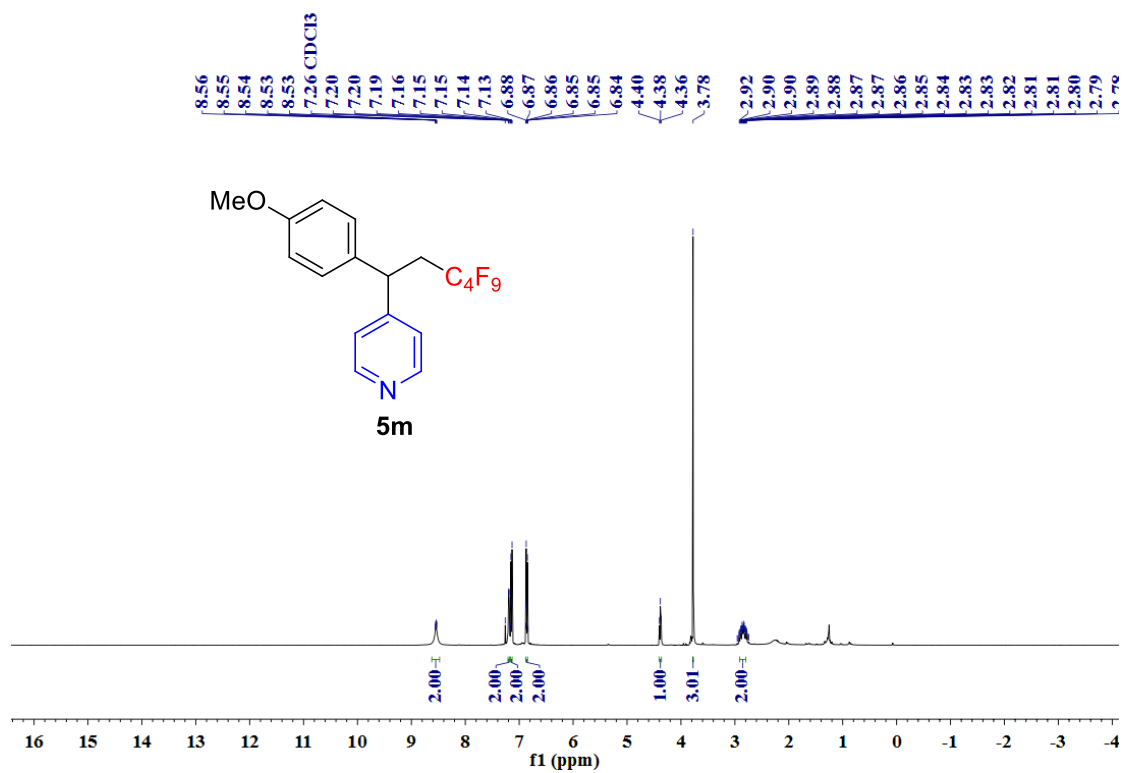

$^{13}\text{C}$  NMR (100 MHz,  $\text{CDCl}_3$ ):

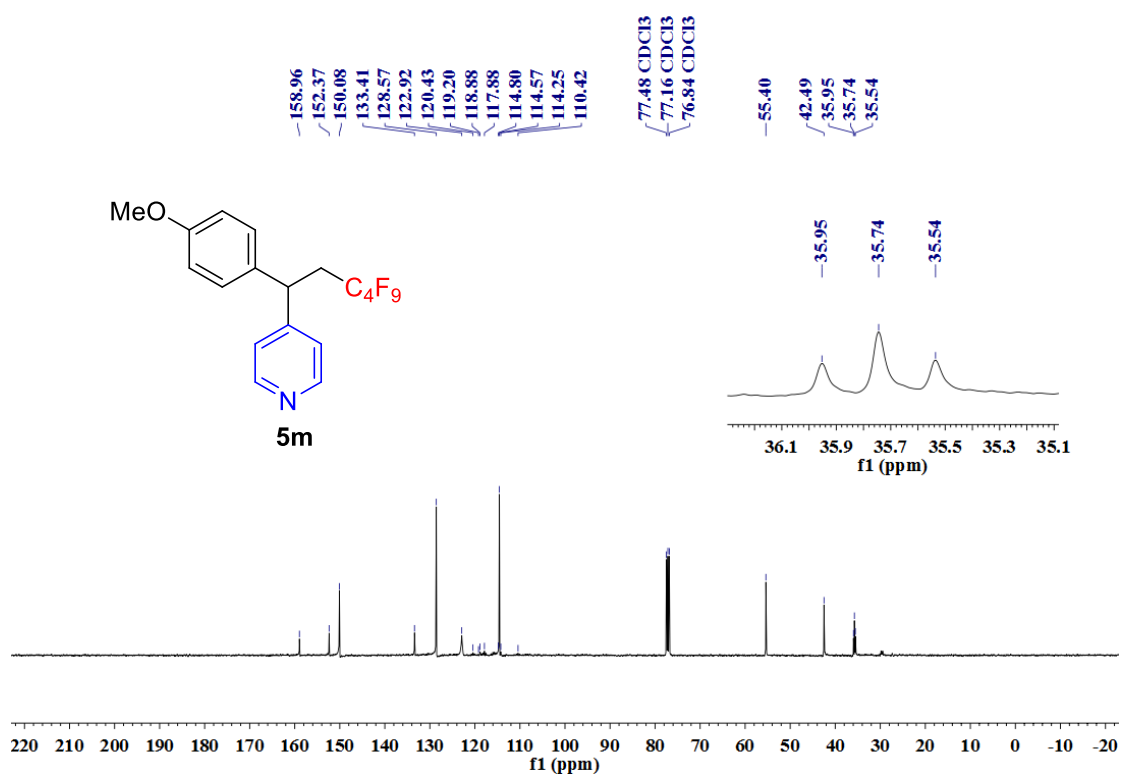

$^{19}\text{F}$  NMR (376 MHz,  $\text{CDCl}_3$ ):

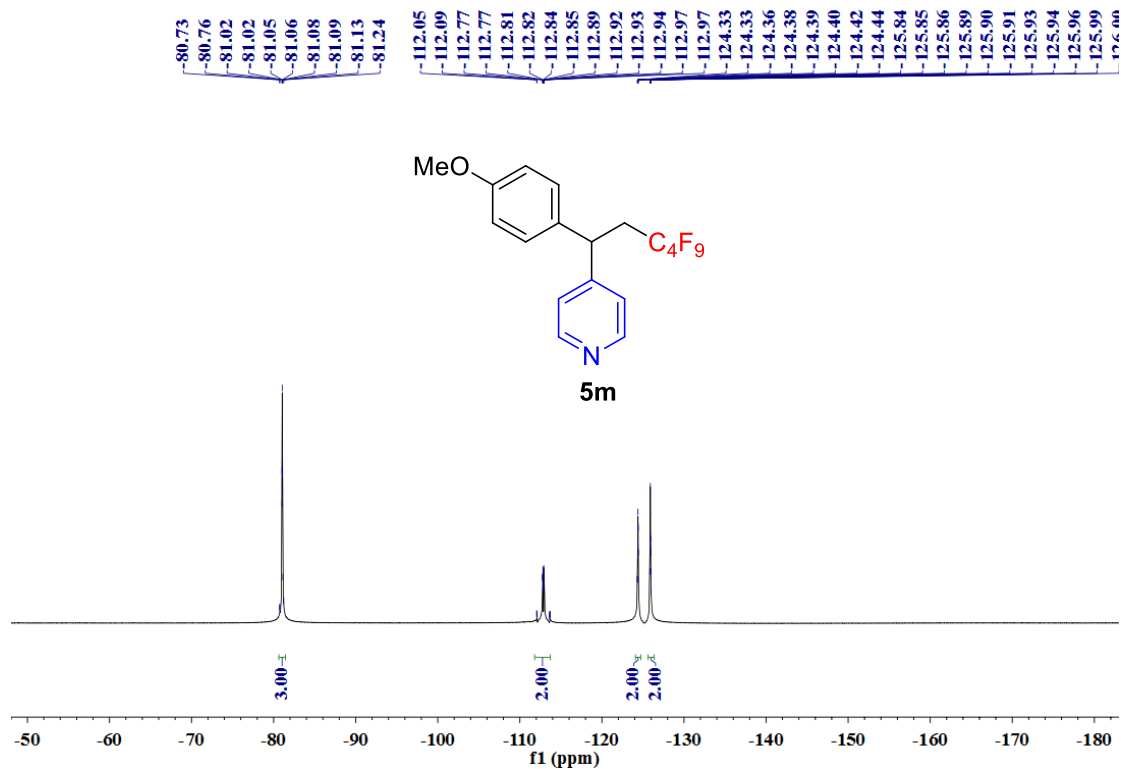

$^1\text{H}$  NMR (400 MHz,  $\text{CDCl}_3$ ):

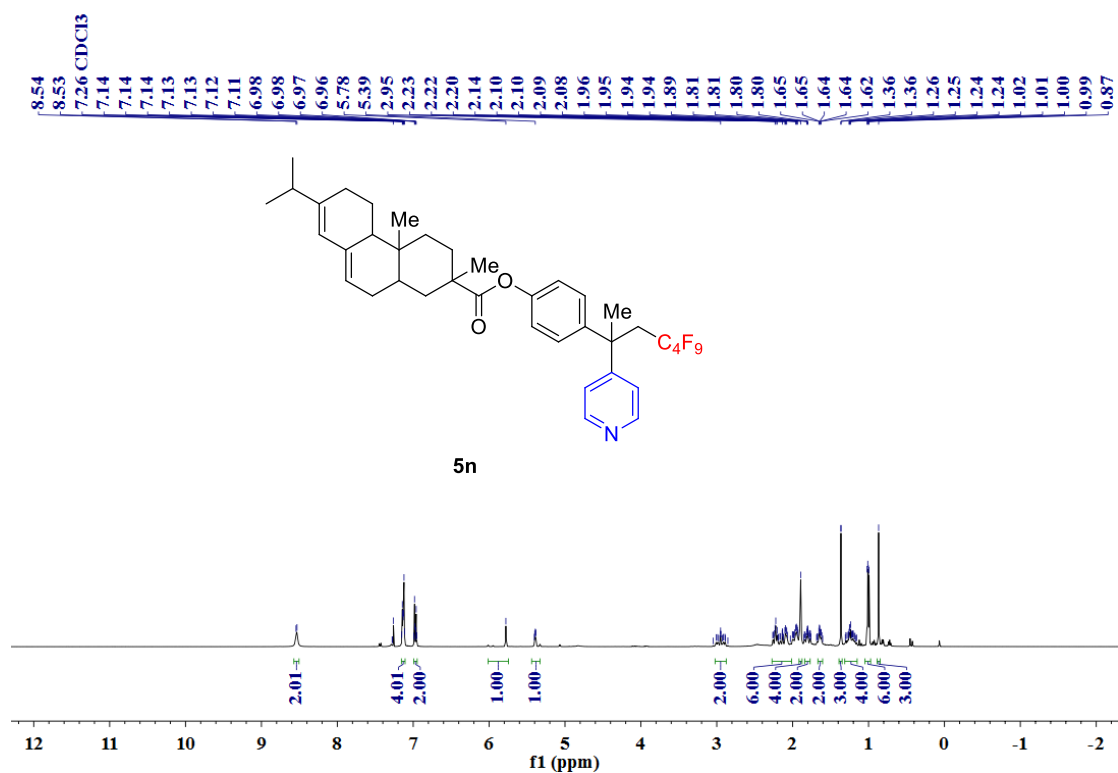

$^{13}\text{C}$  NMR (100 MHz,  $\text{CDCl}_3$ ):

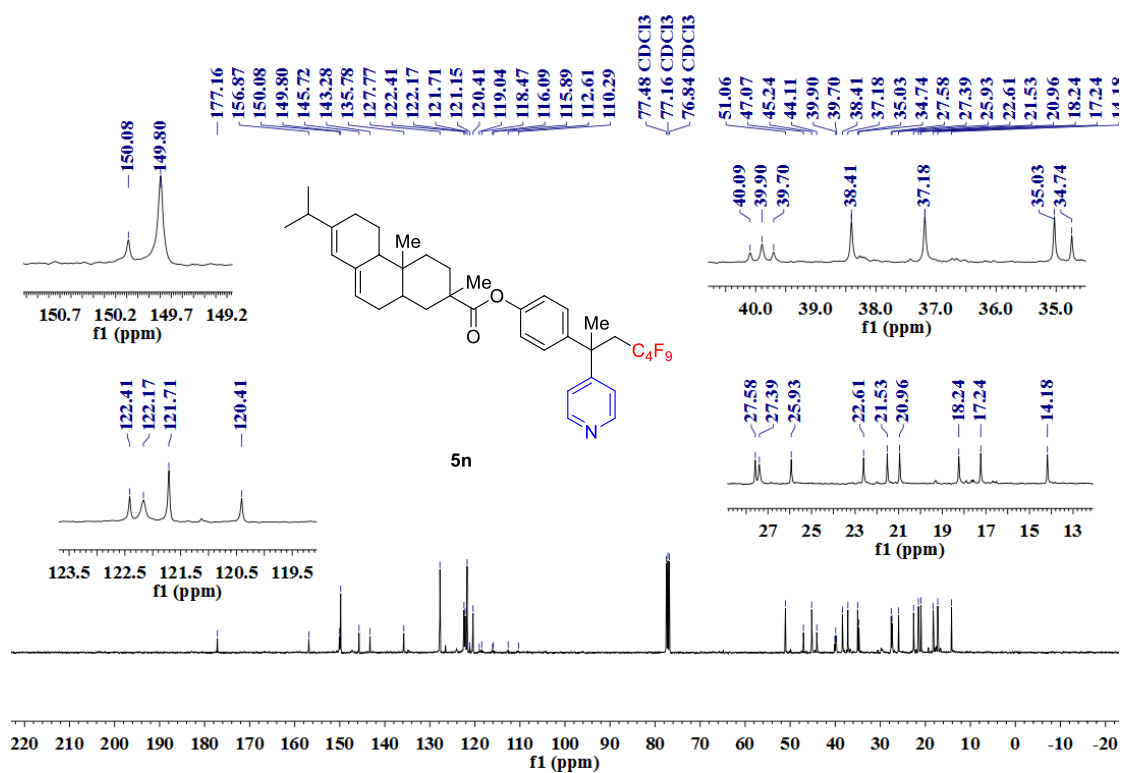

$^{19}\text{F}$  NMR (376 MHz,  $\text{CDCl}_3$ ):

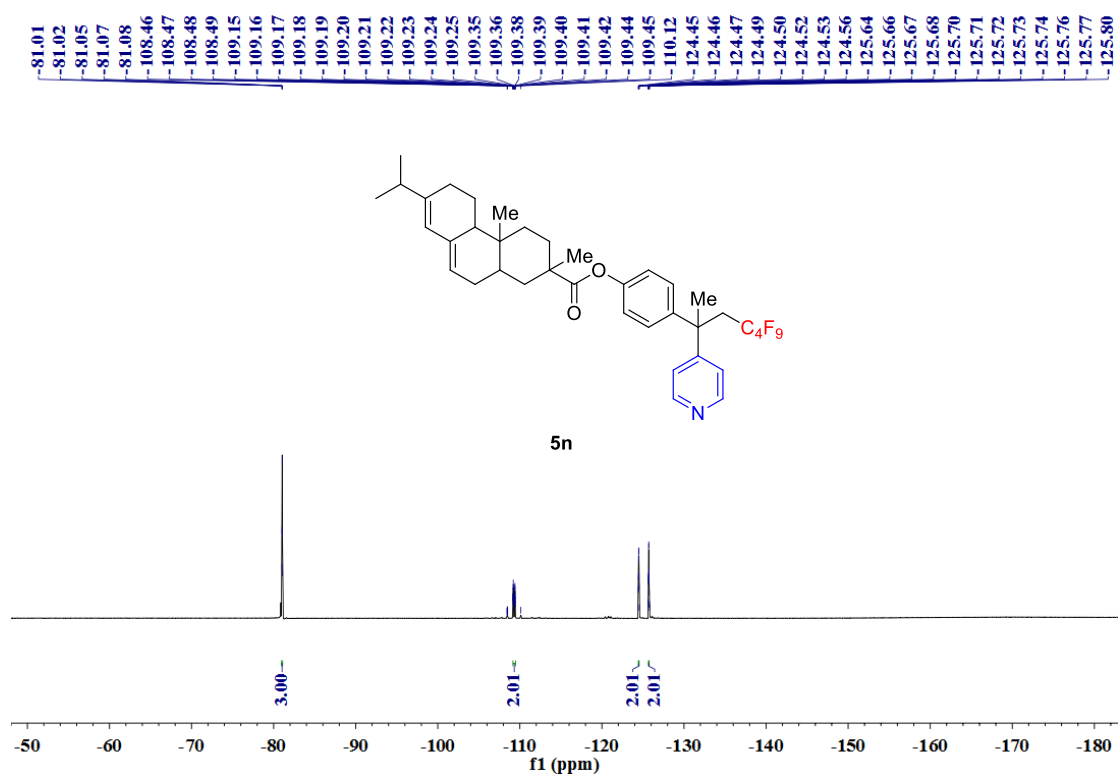

$^1\text{H}$  NMR (400 MHz,  $\text{CDCl}_3$ ):

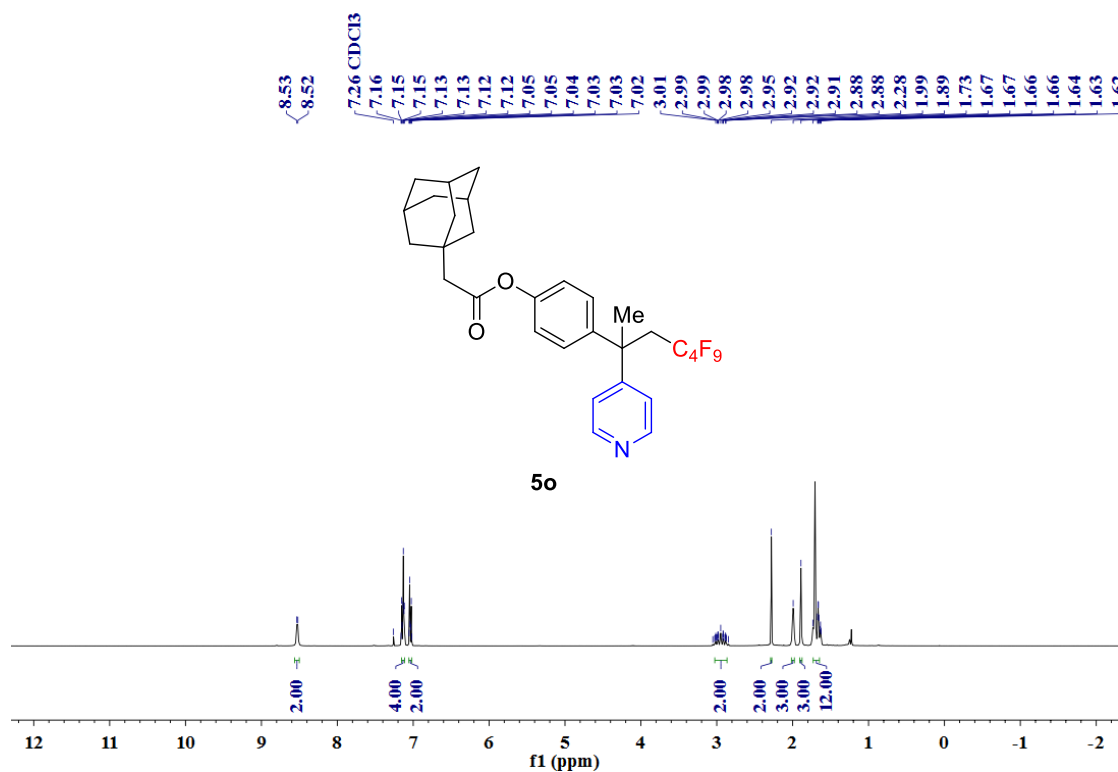

$^{13}\text{C}$  NMR (100 MHz,  $\text{CDCl}_3$ ):

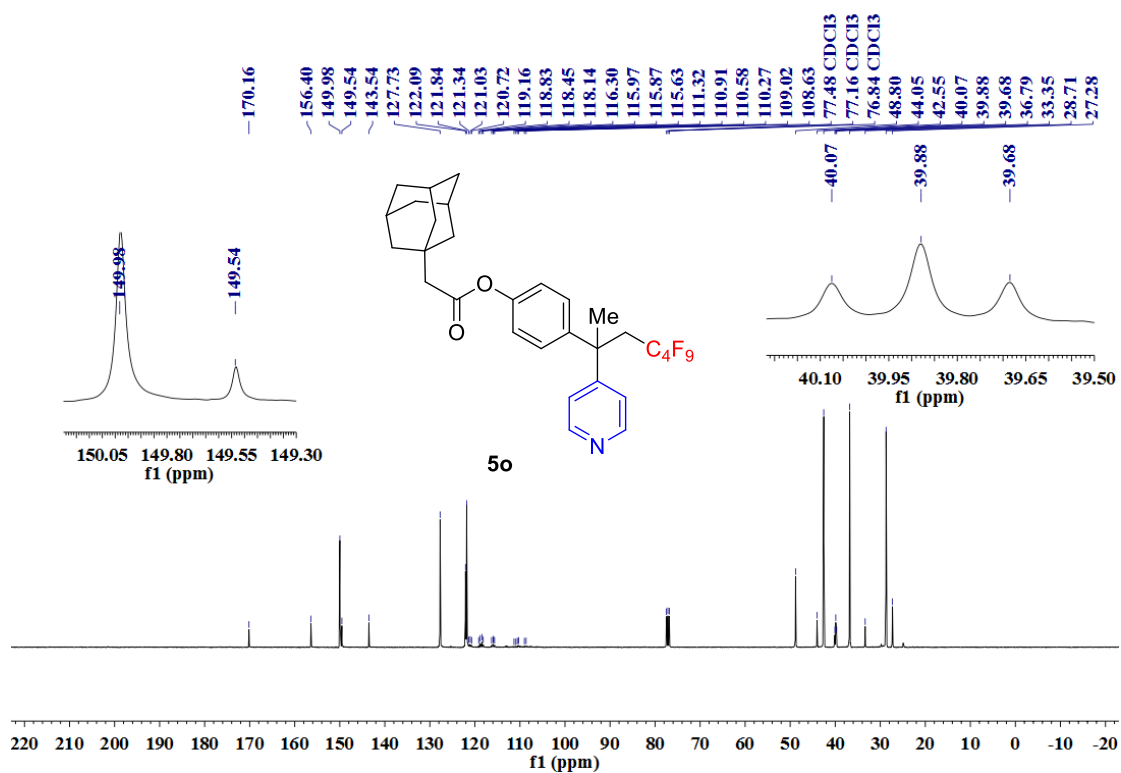

$^{19}\text{F}$  NMR (376 MHz,  $\text{CDCl}_3$ ):

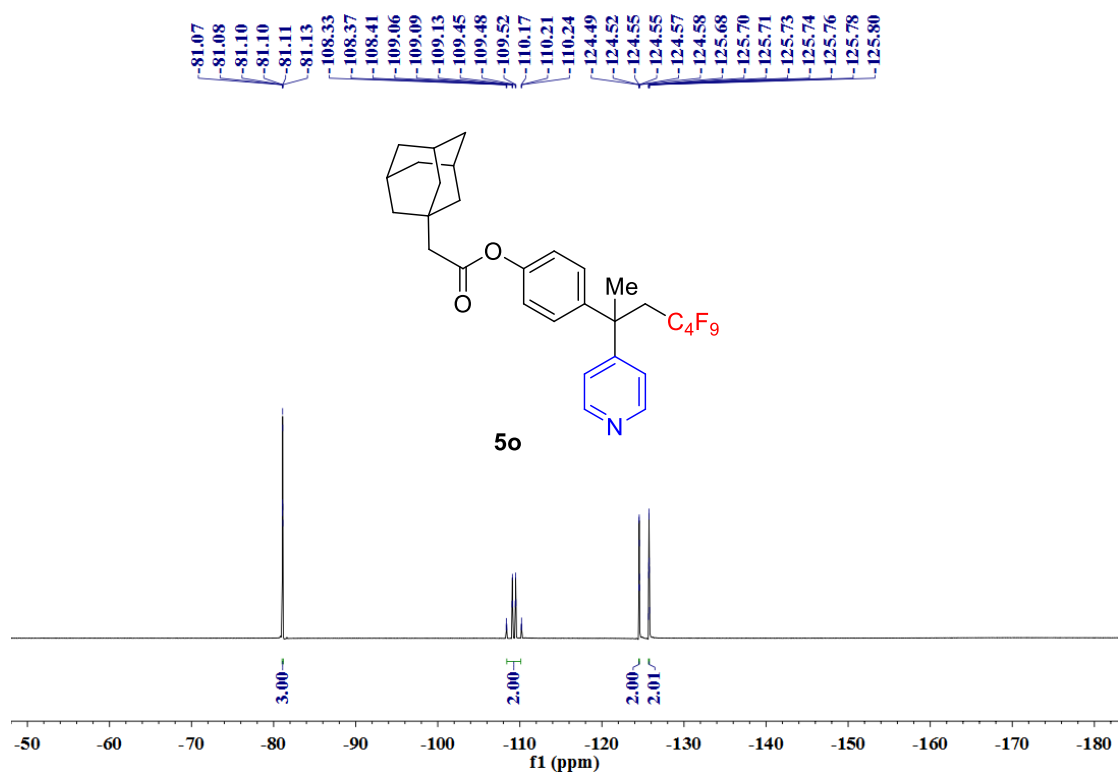

$^1\text{H}$  NMR (400 MHz,  $\text{CDCl}_3$ ):

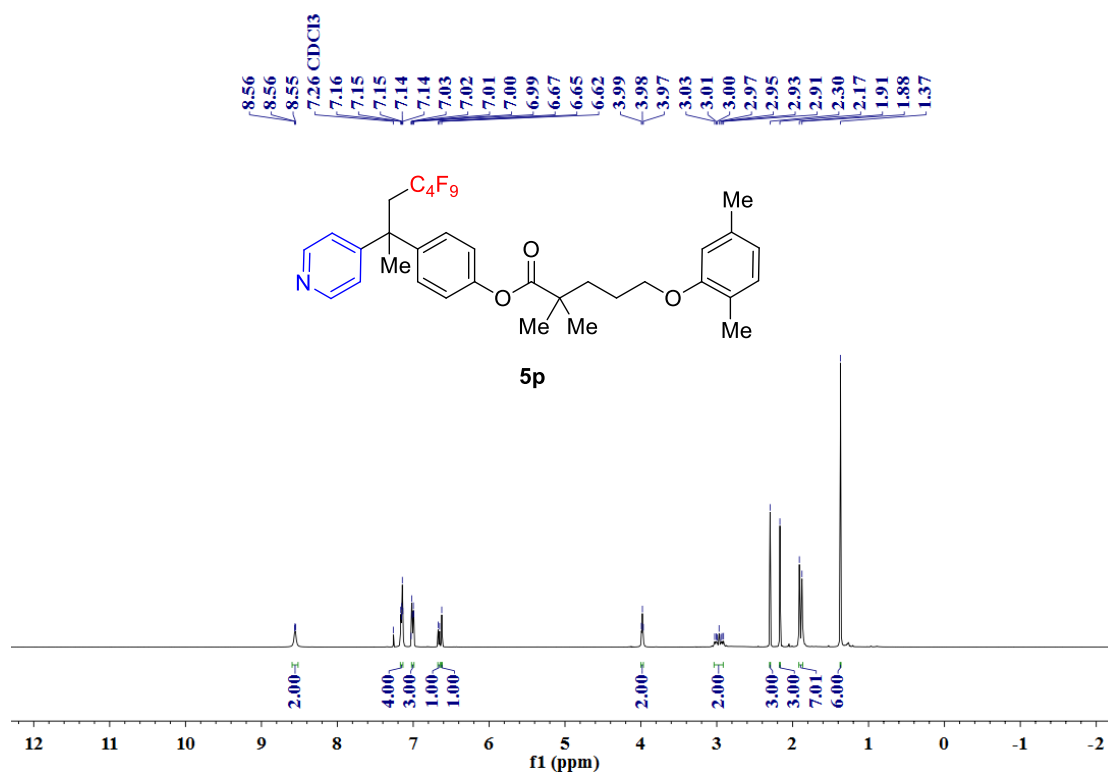

$^{13}\text{C}$  NMR (100 MHz,  $\text{CDCl}_3$ ):

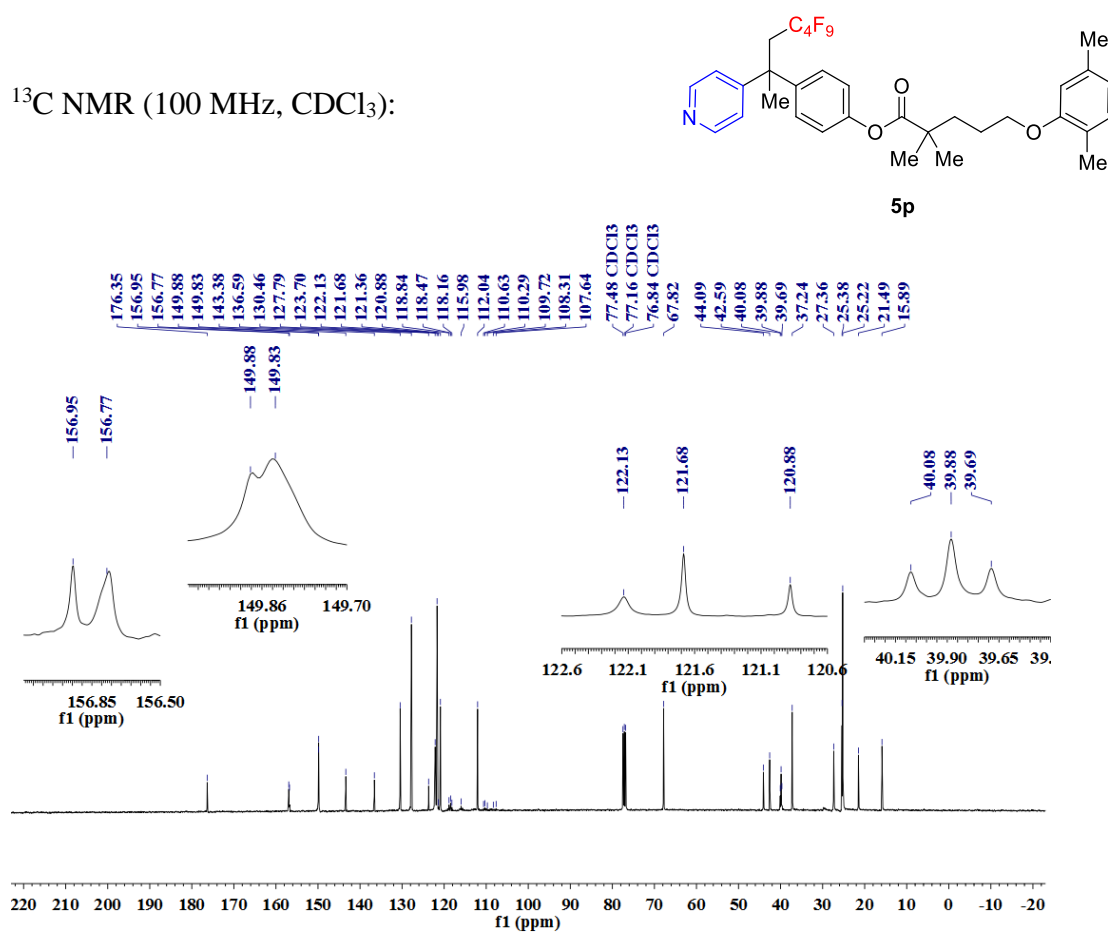



$^{19}\text{F}$  NMR (376 MHz,  $\text{CDCl}_3$ ):

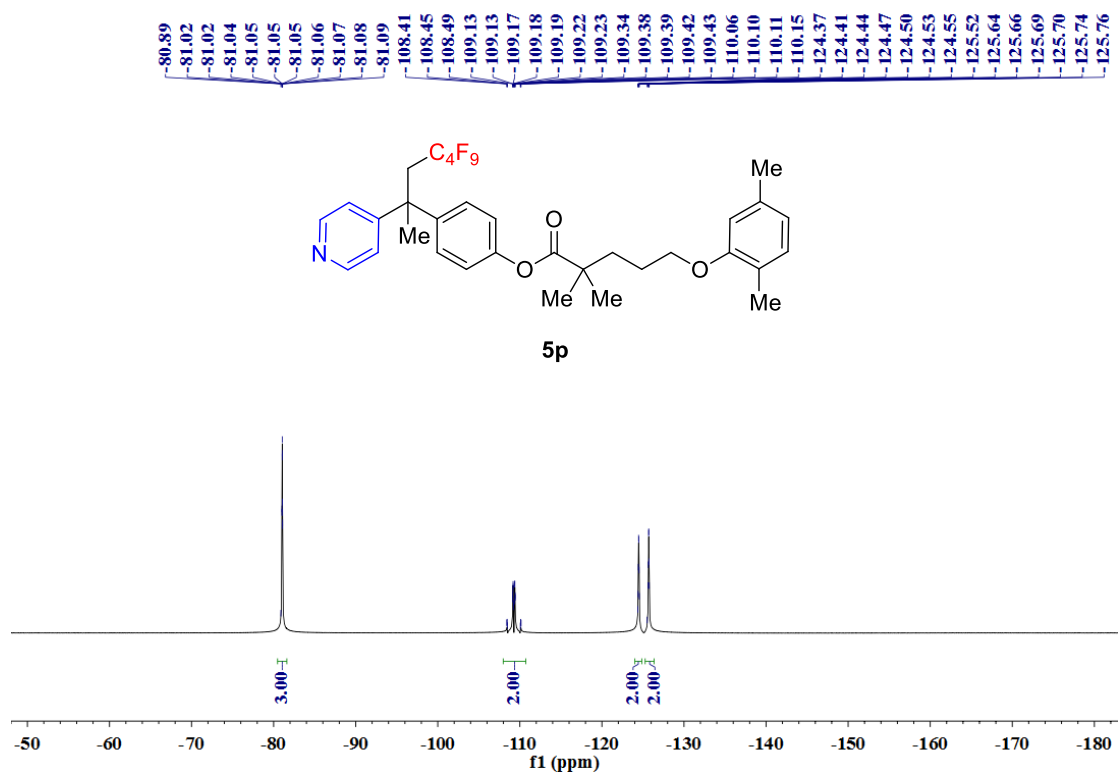

$^1\text{H}$  NMR (400 MHz,  $\text{CDCl}_3$ ):

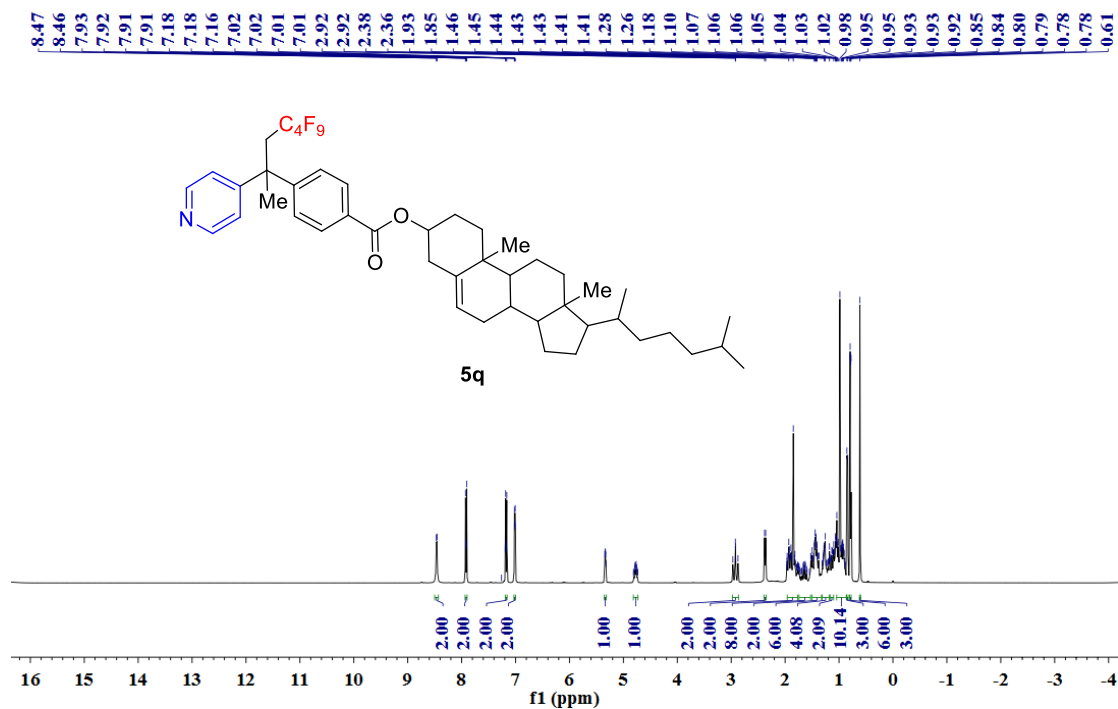

$^{13}\text{C}$  NMR (100 MHz,  $\text{CDCl}_3$ ):

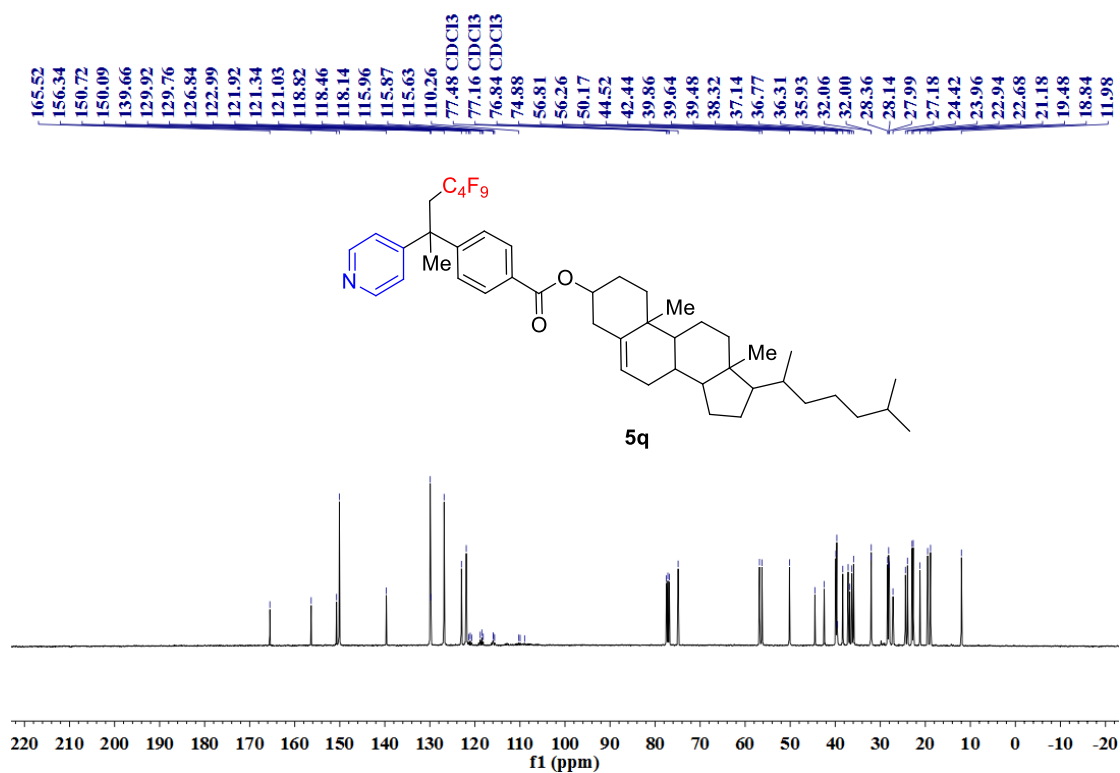

$^{19}\text{F}$  NMR (376 MHz,  $\text{CDCl}_3$ ):

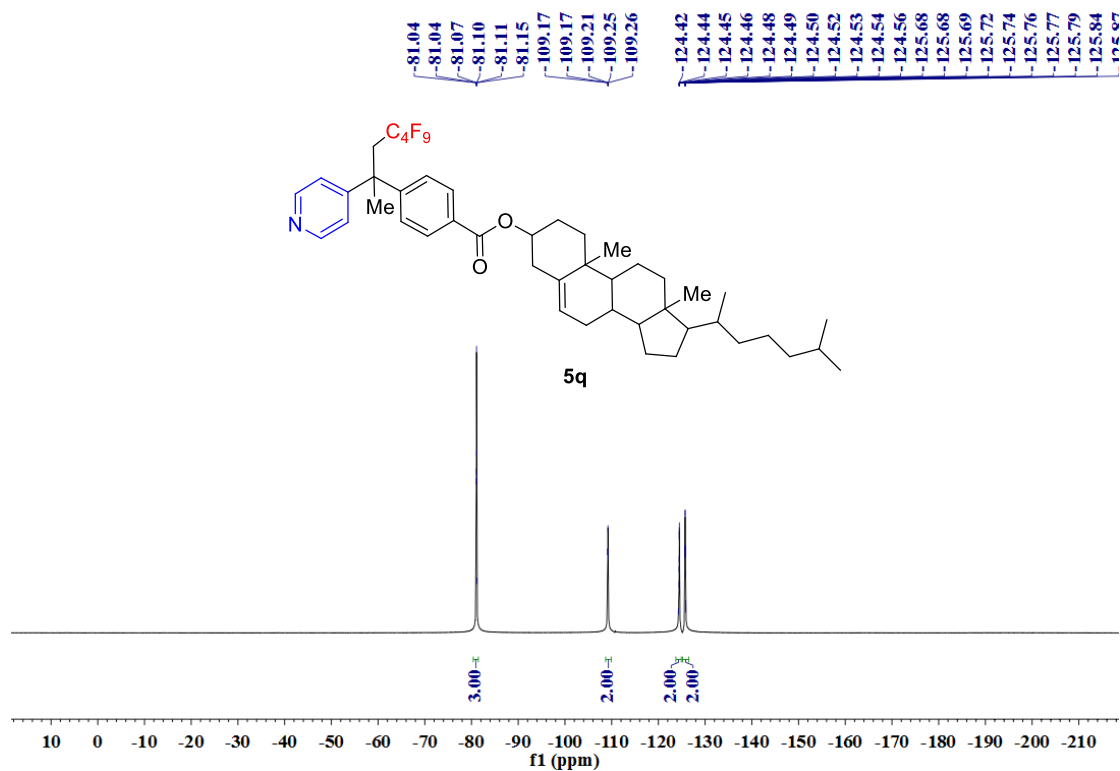

$^1\text{H}$  NMR (400 MHz,  $\text{CDCl}_3$ ):

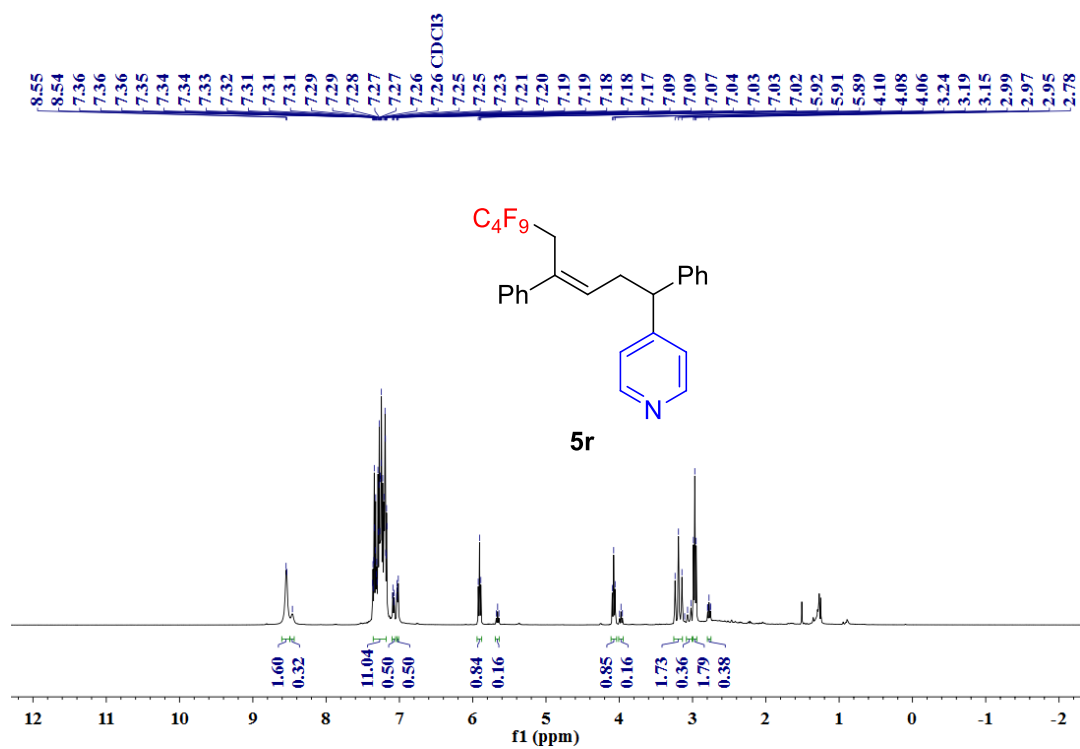

$^{13}\text{C}$  NMR (100 MHz,  $\text{CDCl}_3$ ):

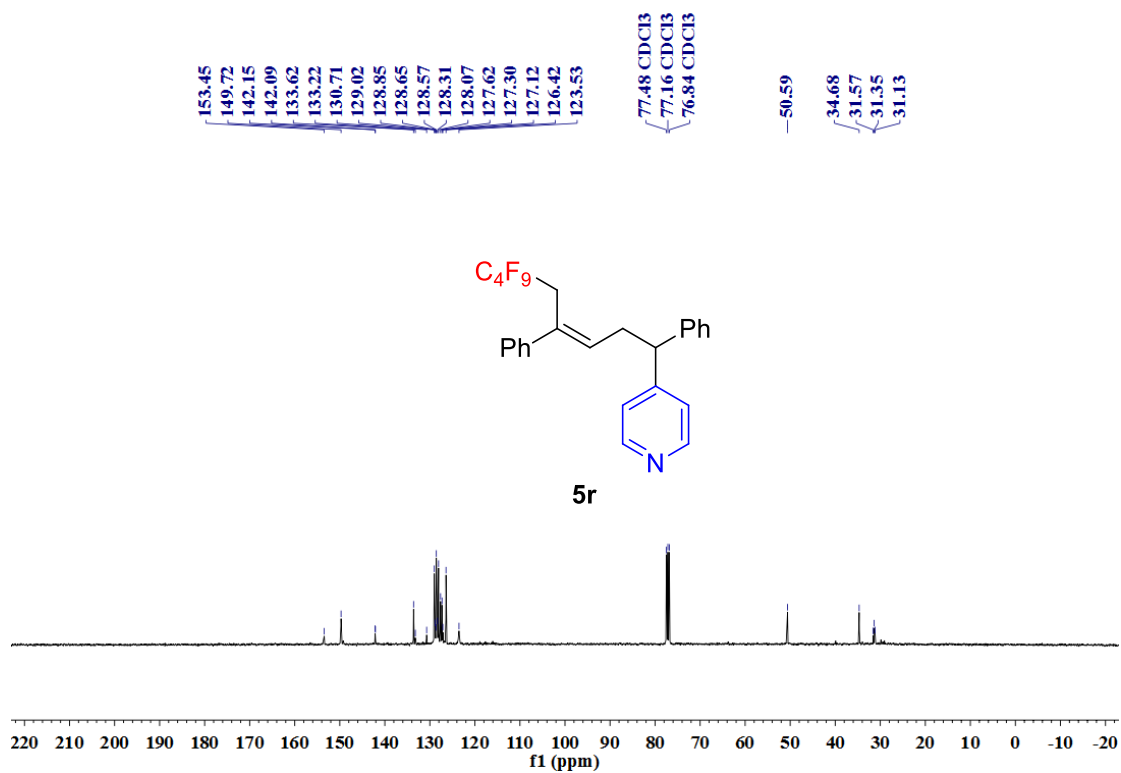

$^{19}\text{F}$  NMR (376 MHz,  $\text{CDCl}_3$ ):

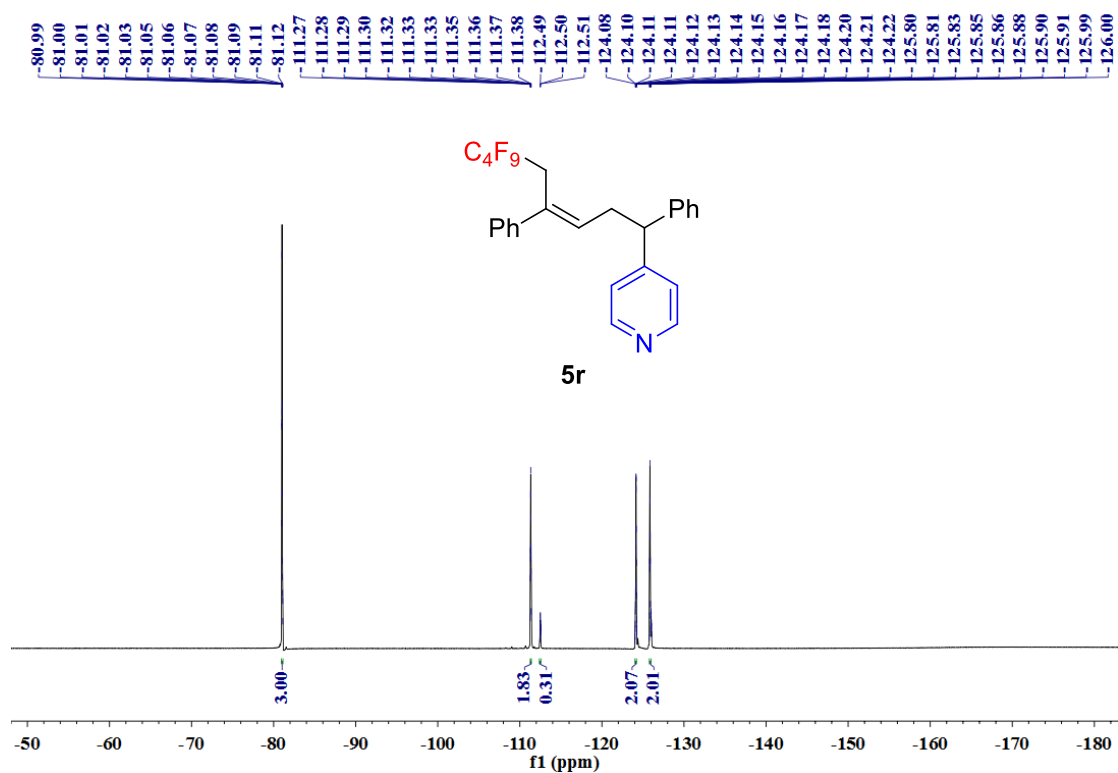

$^1\text{H}$  NMR (400 MHz,  $\text{CDCl}_3$ ):

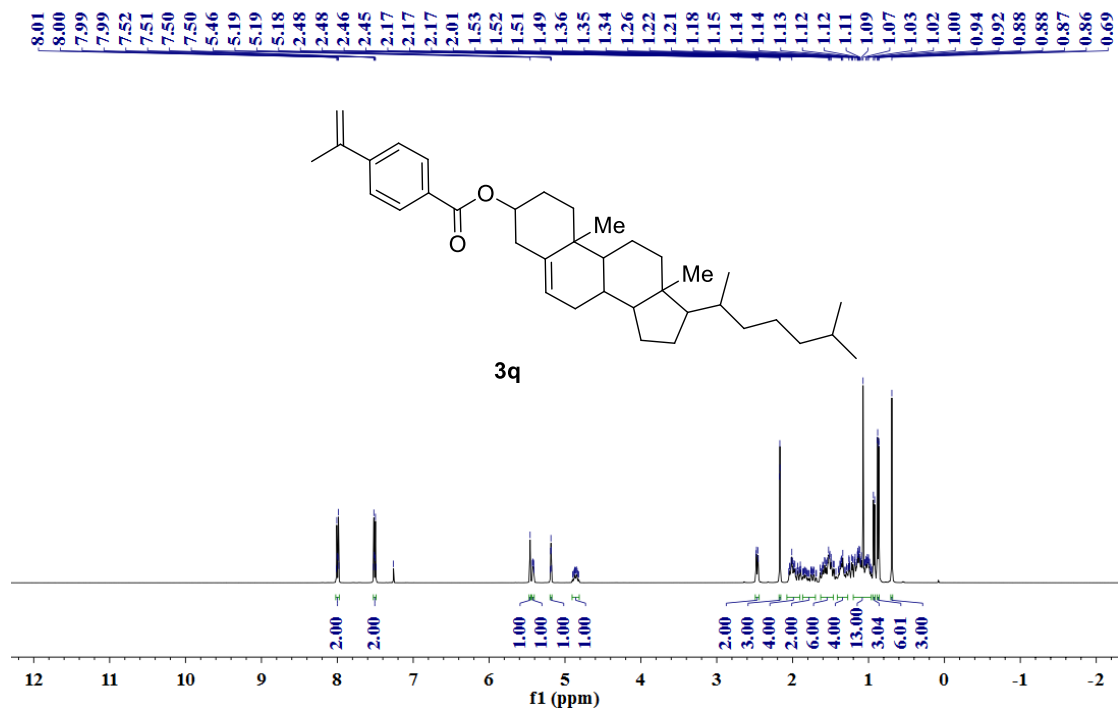

$^{13}\text{C}$  NMR (100 MHz,  $\text{CDCl}_3$ ):

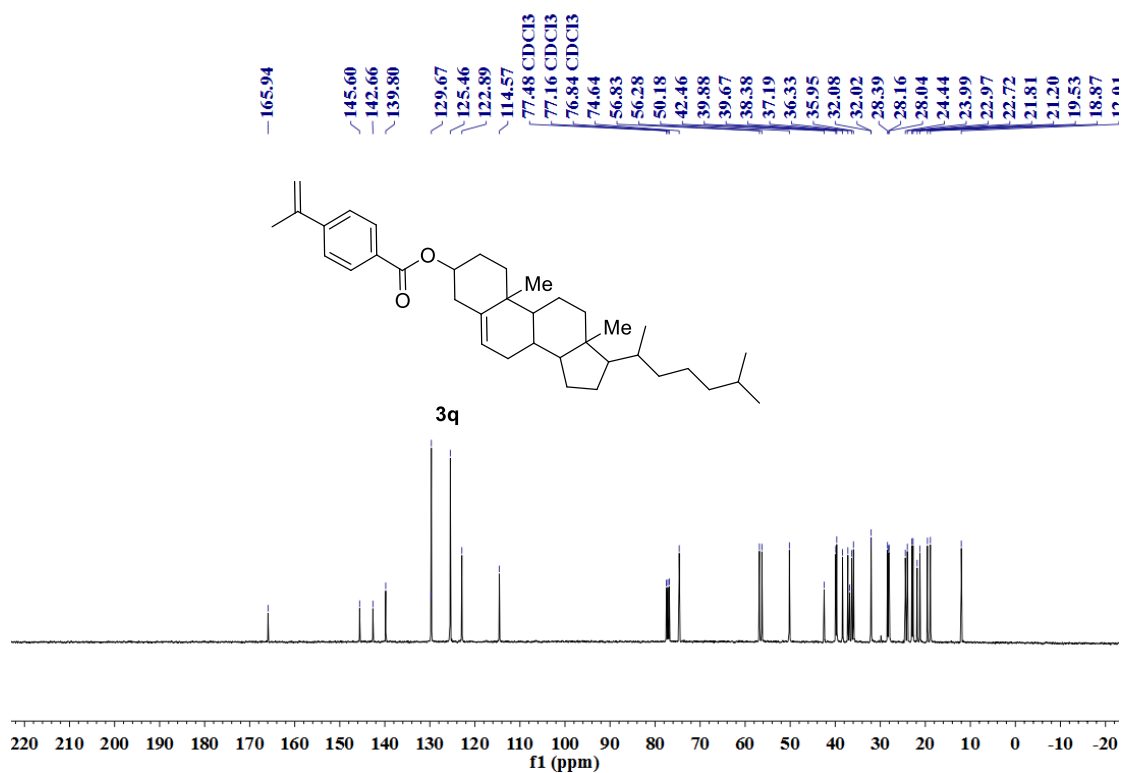

## 6. Cartesian Coordinates of the Optimized Structures

### CF<sub>3</sub>I

Zero-point correction= 0.014644 (Hartree/Particle)  
Thermal correction to Energy= 0.019359  
Thermal correction to Enthalpy= 0.020303  
Thermal correction to Gibbs Free Energy= -0.015577  
Sum of electronic and zero-point Energies= -348.816993  
Sum of electronic and thermal Energies= -348.812278  
Sum of electronic and thermal Enthalpies= -348.811333  
Sum of electronic and thermal Free Energies= -348.847214

Esol = -348.9903869

---

| Center<br>Number | Atomic<br>Number | Atomic<br>Type | Coordinates (Angstroms) |           |           |
|------------------|------------------|----------------|-------------------------|-----------|-----------|
|                  |                  |                | X                       | Y         | Z         |
| 1                | 9                | 0              | -1.650388               | 1.239559  | 0.081260  |
| 2                | 9                | 0              | -1.650236               | -0.690139 | 1.032892  |
| 3                | 9                | 0              | -1.650420               | -0.549094 | -1.113869 |
| 4                | 6                | 0              | -1.196314               | 0.000127  | 0.000118  |
| 5                | 53               | 0              | 0.988652                | -0.000274 | -0.000230 |

---

### CF<sub>3</sub>I anion

Zero-point correction= 0.012252 (Hartree/Particle)  
Thermal correction to Energy= 0.018032  
Thermal correction to Enthalpy= 0.018976  
Thermal correction to Gibbs Free Energy= -0.021531  
Sum of electronic and zero-point Energies= -348.858162  
Sum of electronic and thermal Energies= -348.852382  
Sum of electronic and thermal Enthalpies= -348.851438  
Sum of electronic and thermal Free Energies= -348.891945

Esol = -349.0769734

---

| Center | Atomic | Atomic | Coordinates (Angstroms) |  |  |
|--------|--------|--------|-------------------------|--|--|
|--------|--------|--------|-------------------------|--|--|

---

| Number | Number | Type | X         | Y         | Z         |
|--------|--------|------|-----------|-----------|-----------|
| 1      | 9      | 0    | 1.977625  | 0.882311  | -0.883684 |
| 2      | 9      | 0    | 1.977573  | -1.206691 | -0.321930 |
| 3      | 9      | 0    | 1.978477  | 0.324281  | 1.206024  |
| 4      | 6      | 0    | 1.481827  | -0.000023 | 0.000233  |
| 5      | 53     | 0    | -1.513899 | 0.000008  | -0.000548 |

#### 4-cyanopyridine-boryl (Int1)

|                                              |                             |
|----------------------------------------------|-----------------------------|
| Zero-point correction=                       | 0.272426 (Hartree/Particle) |
| Thermal correction to Energy=                | 0.288834                    |
| Thermal correction to Enthalpy=              | 0.289778                    |
| Thermal correction to Gibbs Free Energy=     | 0.227912                    |
| Sum of electronic and zero-point Energies=   | -751.250341                 |
| Sum of electronic and thermal Energies=      | -751.233933                 |
| Sum of electronic and thermal Enthalpies=    | -751.232989                 |
| Sum of electronic and thermal Free Energies= | -751.294855                 |

Esol = -751.7913445

| Center<br>Number | Atomic<br>Number | Atomic<br>Type | Coordinates (Angstroms) |           |           |
|------------------|------------------|----------------|-------------------------|-----------|-----------|
|                  |                  |                | X                       | Y         | Z         |
| 1                | 6                | 0              | 1.659096                | 1.185973  | -0.180389 |
| 2                | 6                | 0              | 3.014411                | 1.204109  | -0.183755 |
| 3                | 6                | 0              | 3.757894                | -0.000017 | -0.000053 |
| 4                | 6                | 0              | 3.014407                | -1.204136 | 0.183668  |
| 5                | 6                | 0              | 1.659092                | -1.185990 | 0.180337  |
| 6                | 7                | 0              | 0.942727                | -0.000006 | -0.000016 |
| 7                | 1                | 0              | 1.051679                | 2.071756  | -0.314909 |
| 8                | 1                | 0              | 3.531257                | 2.145335  | -0.327519 |
| 9                | 1                | 0              | 3.531249                | -2.145366 | 0.327418  |
| 10               | 1                | 0              | 1.051672                | -2.071769 | 0.314874  |
| 11               | 6                | 0              | 5.172422                | -0.000022 | -0.000072 |
| 12               | 7                | 0              | 6.335976                | -0.000025 | -0.000087 |
| 13               | 5                | 0              | -0.497292               | 0.000000  | 0.000005  |
| 14               | 8                | 0              | -1.235849               | -1.129146 | 0.227042  |
| 15               | 8                | 0              | -1.235845               | 1.129154  | -0.227011 |
| 16               | 6                | 0              | -2.601367               | -0.776254 | -0.104468 |
| 17               | 6                | 0              | -2.601356               | 0.776276  | 0.104543  |

|    |   |   |           |           |           |
|----|---|---|-----------|-----------|-----------|
| 18 | 6 | 0 | -3.542222 | -1.540887 | 0.809991  |
| 19 | 1 | 0 | -4.576183 | -1.223153 | 0.642282  |
| 20 | 1 | 0 | -3.473353 | -2.609868 | 0.594657  |
| 21 | 1 | 0 | -3.290618 | -1.385312 | 1.859912  |
| 22 | 6 | 0 | -2.822209 | -1.174404 | -1.561111 |
| 23 | 1 | 0 | -2.597029 | -2.237333 | -1.673512 |
| 24 | 1 | 0 | -3.857039 | -1.002112 | -1.868613 |
| 25 | 1 | 0 | -2.161107 | -0.609992 | -2.225328 |
| 26 | 6 | 0 | -3.542231 | 1.540919  | -0.809886 |
| 27 | 1 | 0 | -4.576192 | 1.223209  | -0.642133 |
| 28 | 1 | 0 | -3.473330 | 2.609901  | -0.594564 |
| 29 | 1 | 0 | -3.290672 | 1.385330  | -1.859815 |
| 30 | 6 | 0 | -2.822149 | 1.174428  | 1.561193  |
| 31 | 1 | 0 | -2.596958 | 2.237355  | 1.673587  |
| 32 | 1 | 0 | -3.856970 | 1.002143  | 1.868728  |
| 33 | 1 | 0 | -2.161030 | 0.610012  | 2.225389  |

---

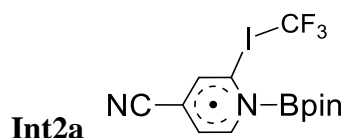

|                                              |                             |
|----------------------------------------------|-----------------------------|
| Zero-point correction=                       | 0.288623 (Hartree/Particle) |
| Thermal correction to Energy=                | 0.311740                    |
| Thermal correction to Enthalpy=              | 0.312684                    |
| Thermal correction to Gibbs Free Energy=     | 0.231236                    |
| Sum of electronic and zero-point Energies=   | -1100.065643                |
| Sum of electronic and thermal Energies=      | -1100.042526                |
| Sum of electronic and thermal Enthalpies=    | -1100.041581                |
| Sum of electronic and thermal Free Energies= | -1100.123029                |

Esol = -1100.7890144

---

| Center<br>Number | Atomic<br>Number | Atomic<br>Type | Coordinates (Angstroms) |           |           |
|------------------|------------------|----------------|-------------------------|-----------|-----------|
|                  |                  |                | X                       | Y         | Z         |
| 1                | 6                | 0              | 1.502341                | 0.954554  | -1.249748 |
| 2                | 6                | 0              | 2.857875                | 0.977417  | -1.238711 |
| 3                | 6                | 0              | 3.602109                | -0.202176 | -0.932074 |
| 4                | 6                | 0              | 2.860150                | -1.385438 | -0.646604 |
| 5                | 6                | 0              | 1.501777                | -1.373238 | -0.674785 |



|    |    |   |           |           |           |
|----|----|---|-----------|-----------|-----------|
| 6  | 7  | 0 | 0.787144  | -0.210649 | -0.971231 |
| 7  | 1  | 0 | 0.894308  | 1.823993  | -1.463528 |
| 8  | 1  | 0 | 3.375170  | 1.902709  | -1.461254 |
| 9  | 1  | 0 | 3.377290  | -2.309132 | -0.415098 |
| 10 | 1  | 0 | 0.894153  | -2.248330 | -0.480876 |
| 11 | 6  | 0 | 5.017037  | -0.198206 | -0.910962 |
| 12 | 7  | 0 | 6.179958  | -0.195110 | -0.893610 |
| 13 | 5  | 0 | -0.650204 | -0.187669 | -0.846728 |
| 14 | 8  | 0 | -1.360834 | -1.277739 | -0.435797 |
| 15 | 8  | 0 | -1.398474 | 0.926204  | -1.102411 |
| 16 | 6  | 0 | -2.757678 | -0.920335 | -0.571361 |
| 17 | 6  | 0 | -2.708918 | 0.647344  | -0.547946 |
| 18 | 6  | 0 | -3.526457 | -1.545526 | 0.580706  |
| 19 | 1  | 0 | -4.568770 | -1.211961 | 0.571343  |
| 20 | 1  | 0 | -3.514262 | -2.633349 | 0.479477  |
| 21 | 1  | 0 | -3.077878 | -1.285487 | 1.541027  |
| 22 | 6  | 0 | -3.230755 | -1.479426 | -1.909797 |
| 23 | 1  | 0 | -3.046622 | -2.555930 | -1.926327 |
| 24 | 1  | 0 | -4.299575 | -1.305504 | -2.059000 |
| 25 | 1  | 0 | -2.682313 | -1.023930 | -2.739345 |
| 26 | 6  | 0 | -3.759800 | 1.328859  | -1.407012 |
| 27 | 1  | 0 | -4.763658 | 1.062914  | -1.061814 |
| 28 | 1  | 0 | -3.647520 | 2.412801  | -1.329505 |
| 29 | 1  | 0 | -3.660645 | 1.047676  | -2.456246 |
| 30 | 6  | 0 | -2.715841 | 1.217847  | 0.867509  |
| 31 | 1  | 0 | -2.474982 | 2.282188  | 0.818568  |
| 32 | 1  | 0 | -3.694071 | 1.100965  | 1.341262  |
| 33 | 1  | 0 | -1.966735 | 0.723511  | 1.492404  |
| 34 | 53 | 0 | 0.771726  | -0.783198 | 2.576765  |
| 35 | 6  | 0 | -0.587154 | -0.371659 | 4.230575  |
| 36 | 9  | 0 | -0.298213 | 0.789562  | 4.794702  |
| 37 | 9  | 0 | -0.508430 | -1.322911 | 5.146339  |
| 38 | 9  | 0 | -1.840756 | -0.320359 | 3.784992  |

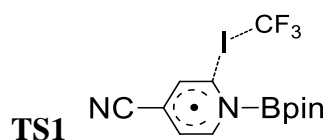

|                                            |                             |
|--------------------------------------------|-----------------------------|
| Zero-point correction=                     | 0.288206 (Hartree/Particle) |
| Thermal correction to Energy=              | 0.311163                    |
| Thermal correction to Enthalpy=            | 0.312107                    |
| Thermal correction to Gibbs Free Energy=   | 0.231338                    |
| Sum of electronic and zero-point Energies= | -1100.029343                |

Sum of electronic and thermal Energies= -1100.006387  
 Sum of electronic and thermal Enthalpies= -1100.005443  
 Sum of electronic and thermal Free Energies= -1100.086212

Esol = -1100.7486466

| Center<br>Number | Atomic<br>Number | Atomic<br>Type | Coordinates (Angstroms) |           |           |
|------------------|------------------|----------------|-------------------------|-----------|-----------|
|                  |                  |                | X                       | Y         | Z         |
| 1                | 6                | 0              | 1.507788                | 0.931813  | -1.367221 |
| 2                | 6                | 0              | 2.864310                | 0.978608  | -1.352614 |
| 3                | 6                | 0              | 3.586362                | -0.199540 | -0.983917 |
| 4                | 6                | 0              | 2.906172                | -1.313349 | -0.553069 |
| 5                | 6                | 0              | 1.497359                | -1.280012 | -0.486072 |
| 6                | 7                | 0              | 0.830691                | -0.218072 | -1.041383 |
| 7                | 1                | 0              | 0.883214                | 1.770534  | -1.649234 |
| 8                | 1                | 0              | 3.388670                | 1.882569  | -1.631294 |
| 9                | 1                | 0              | 3.427295                | -2.202750 | -0.221500 |
| 10               | 1                | 0              | 0.909782                | -2.175080 | -0.339630 |
| 11               | 6                | 0              | 5.020007                | -0.206287 | -1.053428 |
| 12               | 7                | 0              | 6.174800                | -0.203035 | -1.126133 |
| 13               | 5                | 0              | -0.639325               | -0.199333 | -0.930356 |
| 14               | 8                | 0              | -1.322866               | -1.299118 | -0.553334 |
| 15               | 8                | 0              | -1.364395               | 0.921883  | -1.156141 |
| 16               | 6                | 0              | -2.729297               | -0.924237 | -0.588884 |
| 17               | 6                | 0              | -2.664054               | 0.645065  | -0.546034 |
| 18               | 6                | 0              | -3.418150               | -1.556335 | 0.607938  |
| 19               | 1                | 0              | -4.457743               | -1.219208 | 0.667170  |
| 20               | 1                | 0              | -3.416576               | -2.642983 | 0.495544  |
| 21               | 1                | 0              | -2.906110               | -1.304904 | 1.538059  |
| 22               | 6                | 0              | -3.289015               | -1.466205 | -1.899322 |
| 23               | 1                | 0              | -3.123389               | -2.545184 | -1.934058 |
| 24               | 1                | 0              | -4.362301               | -1.275894 | -1.978470 |
| 25               | 1                | 0              | -2.788473               | -1.012315 | -2.759601 |
| 26               | 6                | 0              | -3.739139               | 1.347644  | -1.354409 |
| 27               | 1                | 0              | -4.729050               | 1.090863  | -0.965396 |
| 28               | 1                | 0              | -3.609744               | 2.428979  | -1.270091 |
| 29               | 1                | 0              | -3.692838               | 1.075002  | -2.409652 |
| 30               | 6                | 0              | -2.592965               | 1.196826  | 0.873460  |
| 31               | 1                | 0              | -2.361763               | 2.263395  | 0.824454  |
| 32               | 1                | 0              | -3.544683               | 1.069383  | 1.395578  |
| 33               | 1                | 0              | -1.810638               | 0.698987  | 1.454159  |

|    |    |   |           |           |          |
|----|----|---|-----------|-----------|----------|
| 34 | 53 | 0 | 1.061903  | -0.871489 | 2.228092 |
| 35 | 6  | 0 | -0.903767 | -0.391563 | 4.376450 |
| 36 | 9  | 0 | -0.642633 | 0.711768  | 5.053859 |
| 37 | 9  | 0 | -0.965778 | -1.427280 | 5.191814 |
| 38 | 9  | 0 | -2.063184 | -0.256636 | 3.733645 |

---

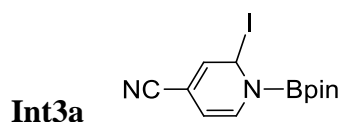

|                                              |                             |
|----------------------------------------------|-----------------------------|
| Zero-point correction=                       | 0.275542 (Hartree/Particle) |
| Thermal correction to Energy=                | 0.293682                    |
| Thermal correction to Enthalpy=              | 0.294626                    |
| Thermal correction to Gibbs Free Energy=     | 0.228064                    |
| Sum of electronic and zero-point Energies=   | -762.600992                 |
| Sum of electronic and thermal Energies=      | -762.582852                 |
| Sum of electronic and thermal Enthalpies=    | -762.581908                 |
| Sum of electronic and thermal Free Energies= | -762.648470                 |

Esol = -763.1532994

---

| Center<br>Number | Atomic<br>Number | Atomic<br>Type | Coordinates (Angstroms) |           |           |
|------------------|------------------|----------------|-------------------------|-----------|-----------|
|                  |                  |                | X                       | Y         | Z         |
| 1                | 6                | 0              | 1.344328                | 0.900812  | -0.624581 |
| 2                | 6                | 0              | 2.768452                | 0.887494  | -0.840266 |
| 3                | 6                | 0              | 3.438852                | -0.295425 | -0.799722 |
| 4                | 6                | 0              | 2.725862                | -1.528797 | -0.582004 |
| 5                | 6                | 0              | 1.374954                | -1.496322 | -0.595586 |
| 6                | 7                | 0              | 0.686618                | -0.313535 | -0.772425 |
| 7                | 1                | 0              | 0.771265                | 1.749837  | -0.973221 |
| 8                | 1                | 0              | 3.283927                | 1.831435  | -0.967566 |
| 9                | 1                | 0              | 3.260141                | -2.461085 | -0.462885 |
| 10               | 1                | 0              | 0.755301                | -2.380568 | -0.508010 |
| 11               | 6                | 0              | 4.864833                | -0.326806 | -0.980324 |
| 12               | 7                | 0              | 6.010614                | -0.369670 | -1.133639 |
| 13               | 5                | 0              | -0.771919               | -0.308714 | -0.805906 |
| 14               | 8                | 0              | -1.510686               | -1.436680 | -0.638157 |
| 15               | 8                | 0              | -1.475343               | 0.835623  | -0.997125 |
| 16               | 6                | 0              | -2.884924               | -1.042071 | -0.910443 |
| 17               | 6                | 0              | -2.846001               | 0.501848  | -0.642879 |

|    |    |   |           |           |           |
|----|----|---|-----------|-----------|-----------|
| 18 | 6  | 0 | -3.805971 | -1.821435 | 0.010789  |
| 19 | 1  | 0 | -4.837437 | -1.474815 | -0.104766 |
| 20 | 1  | 0 | -3.770467 | -2.882566 | -0.246760 |
| 21 | 1  | 0 | -3.510340 | -1.709378 | 1.054481  |
| 22 | 6  | 0 | -3.158183 | -1.385199 | -2.371449 |
| 23 | 1  | 0 | -2.963352 | -2.448570 | -2.527386 |
| 24 | 1  | 0 | -4.197586 | -1.178127 | -2.638436 |
| 25 | 1  | 0 | -2.505935 | -0.812892 | -3.037443 |
| 26 | 6  | 0 | -3.787421 | 1.320346  | -1.507838 |
| 27 | 1  | 0 | -4.824103 | 1.019832  | -1.327682 |
| 28 | 1  | 0 | -3.688798 | 2.377702  | -1.252304 |
| 29 | 1  | 0 | -3.563453 | 1.199826  | -2.568647 |
| 30 | 6  | 0 | -3.012102 | 0.855396  | 0.831681  |
| 31 | 1  | 0 | -2.750373 | 1.906190  | 0.973092  |
| 32 | 1  | 0 | -4.042448 | 0.698257  | 1.161570  |
| 33 | 1  | 0 | -2.341722 | 0.260842  | 1.459218  |
| 34 | 53 | 0 | 1.101959  | 1.595933  | 1.788026  |

---

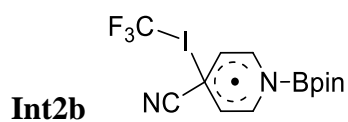

|                                              |                             |
|----------------------------------------------|-----------------------------|
| Zero-point correction=                       | 0.288474 (Hartree/Particle) |
| Thermal correction to Energy=                | 0.311779                    |
| Thermal correction to Enthalpy=              | 0.312723                    |
| Thermal correction to Gibbs Free Energy=     | 0.228448                    |
| Sum of electronic and zero-point Energies=   | -1100.063363                |
| Sum of electronic and thermal Energies=      | -1100.040059                |
| Sum of electronic and thermal Enthalpies=    | -1100.039114                |
| Sum of electronic and thermal Free Energies= | -1100.123389                |

Esol = -1100.7873177

---

| Center<br>Number | Atomic<br>Number | Atomic<br>Type | Coordinates (Angstroms) |           |           |
|------------------|------------------|----------------|-------------------------|-----------|-----------|
|                  |                  |                | X                       | Y         | Z         |
| 1                | 6                | 0              | 1.659096                | 1.185973  | -0.180389 |
| 2                | 6                | 0              | 3.014411                | 1.204109  | -0.183755 |
| 3                | 6                | 0              | 3.757894                | -0.000017 | -0.000053 |
| 4                | 6                | 0              | 3.014407                | -1.204136 | 0.183668  |
| 5                | 6                | 0              | 1.659092                | -1.185990 | 0.180337  |

|    |   |   |           |           |           |
|----|---|---|-----------|-----------|-----------|
| 6  | 7 | 0 | 0.942727  | -0.000006 | -0.000016 |
| 7  | 1 | 0 | 1.051679  | 2.071756  | -0.314909 |
| 8  | 1 | 0 | 3.531257  | 2.145335  | -0.327519 |
| 9  | 1 | 0 | 3.531249  | -2.145366 | 0.327418  |
| 10 | 1 | 0 | 1.051672  | -2.071769 | 0.314874  |
| 11 | 6 | 0 | 5.172422  | -0.000022 | -0.000072 |
| 12 | 7 | 0 | 6.335976  | -0.000025 | -0.000087 |
| 13 | 5 | 0 | -0.497292 | 0.000000  | 0.000005  |
| 14 | 8 | 0 | -1.235849 | -1.129146 | 0.227042  |
| 15 | 8 | 0 | -1.235845 | 1.129154  | -0.227011 |
| 16 | 6 | 0 | -2.601367 | -0.776254 | -0.104468 |
| 17 | 6 | 0 | -2.601356 | 0.776276  | 0.104543  |
| 18 | 6 | 0 | -3.542222 | -1.540887 | 0.809991  |
| 19 | 1 | 0 | -4.576183 | -1.223153 | 0.642282  |
| 20 | 1 | 0 | -3.473353 | -2.609868 | 0.594657  |
| 21 | 1 | 0 | -3.290618 | -1.385312 | 1.859912  |
| 22 | 6 | 0 | -2.822209 | -1.174404 | -1.561111 |
| 23 | 1 | 0 | -2.597029 | -2.237333 | -1.673512 |
| 24 | 1 | 0 | -3.857039 | -1.002112 | -1.868613 |
| 25 | 1 | 0 | -2.161107 | -0.609992 | -2.225328 |
| 26 | 6 | 0 | -3.542231 | 1.540919  | -0.809886 |
| 27 | 1 | 0 | -4.576192 | 1.223209  | -0.642133 |
| 28 | 1 | 0 | -3.473330 | 2.609901  | -0.594564 |
| 29 | 1 | 0 | -3.290672 | 1.385330  | -1.859815 |
| 30 | 6 | 0 | -2.822149 | 1.174428  | 1.561193  |
| 31 | 1 | 0 | -2.596958 | 2.237355  | 1.673587  |
| 32 | 1 | 0 | -3.856970 | 1.002143  | 1.868728  |
| 33 | 1 | 0 | -2.161030 | 0.610012  | 2.225389  |

---

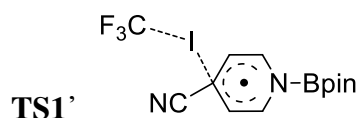

|                                              |                             |
|----------------------------------------------|-----------------------------|
| Zero-point correction=                       | 0.288218 (Hartree/Particle) |
| Thermal correction to Energy=                | 0.311310                    |
| Thermal correction to Enthalpy=              | 0.312254                    |
| Thermal correction to Gibbs Free Energy=     | 0.229019                    |
| Sum of electronic and zero-point Energies=   | -1100.018179                |
| Sum of electronic and thermal Energies=      | -1099.995088                |
| Sum of electronic and thermal Enthalpies=    | -1099.994144                |
| Sum of electronic and thermal Free Energies= | -1100.077379                |

Esol = -1100.7382104

---

| Center<br>Number | Atomic<br>Number | Atomic<br>Type | Coordinates (Angstroms) |           |           |
|------------------|------------------|----------------|-------------------------|-----------|-----------|
|                  |                  |                | X                       | Y         | Z         |
| 1                | 6                | 0              | 1.298074                | 1.054842  | -1.314851 |
| 2                | 6                | 0              | 2.637879                | 1.153919  | -1.420122 |
| 3                | 6                | 0              | 3.489706                | 0.021438  | -1.087111 |
| 4                | 6                | 0              | 2.786836                | -1.246121 | -0.953204 |
| 5                | 6                | 0              | 1.442524                | -1.275382 | -0.863620 |
| 6                | 7                | 0              | 0.671238                | -0.133406 | -0.984613 |
| 7                | 1                | 0              | 0.632200                | 1.889459  | -1.497484 |
| 8                | 1                | 0              | 3.095624                | 2.094849  | -1.696568 |
| 9                | 1                | 0              | 3.359540                | -2.160636 | -0.869842 |
| 10               | 1                | 0              | 0.884867                | -2.190966 | -0.708578 |
| 11               | 6                | 0              | 4.757433                | -0.036959 | -1.790862 |
| 12               | 7                | 0              | 5.730717                | -0.097790 | -2.412908 |
| 13               | 5                | 0              | -0.771986               | -0.195010 | -0.839385 |
| 14               | 8                | 0              | -1.420745               | -1.342636 | -0.499941 |
| 15               | 8                | 0              | -1.570844               | 0.889427  | -1.036907 |
| 16               | 6                | 0              | -2.833232               | -1.063891 | -0.695733 |
| 17               | 6                | 0              | -2.884652               | 0.495771  | -0.556528 |
| 18               | 6                | 0              | -3.630357               | -1.822310 | 0.350558  |
| 19               | 1                | 0              | -4.689663               | -1.555360 | 0.286930  |
| 20               | 1                | 0              | -3.537158               | -2.896301 | 0.173922  |
| 21               | 1                | 0              | -3.271236               | -1.607710 | 1.357741  |
| 22               | 6                | 0              | -3.186547               | -1.544774 | -2.100112 |
| 23               | 1                | 0              | -2.928577               | -2.602540 | -2.186216 |
| 24               | 1                | 0              | -4.254378               | -1.428434 | -2.301842 |
| 25               | 1                | 0              | -2.625778               | -0.990208 | -2.858181 |
| 26               | 6                | 0              | -3.940947               | 1.175947  | -1.409063 |
| 27               | 1                | 0              | -4.938238               | 0.822156  | -1.130391 |
| 28               | 1                | 0              | -3.903233               | 2.255347  | -1.245457 |
| 29               | 1                | 0              | -3.781413               | 0.983645  | -2.470755 |
| 30               | 6                | 0              | -2.979215               | 0.957752  | 0.894584  |
| 31               | 1                | 0              | -2.798022               | 2.033971  | 0.934614  |
| 32               | 1                | 0              | -3.968962               | 0.754406  | 1.311170  |
| 33               | 1                | 0              | -2.229399               | 0.459657  | 1.516044  |
| 34               | 53               | 0              | 4.398413                | 0.526253  | 1.204558  |
| 35               | 6                | 0              | 5.347502                | 1.149689  | 4.101568  |
| 36               | 9                | 0              | 5.881949                | 2.353157  | 4.118095  |
| 37               | 9                | 0              | 6.224246                | 0.240165  | 4.472868  |
| 38               | 9                | 0              | 4.273000                | 1.103588  | 4.863981  |

---

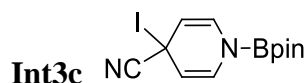

Zero-point correction= 0.275222 (Hartree/Particle)  
 Thermal correction to Energy= 0.293334  
 Thermal correction to Enthalpy= 0.294279  
 Thermal correction to Gibbs Free Energy= 0.227704  
 Sum of electronic and zero-point Energies= -762.591352  
 Sum of electronic and thermal Energies= -762.573240  
 Sum of electronic and thermal Enthalpies= -762.572295  
 Sum of electronic and thermal Free Energies= -762.638870

Esol = -763.143816

| Center<br>Number | Atomic<br>Number | Atomic<br>Type | Coordinates (Angstroms) |           |           |
|------------------|------------------|----------------|-------------------------|-----------|-----------|
|                  |                  |                | X                       | Y         | Z         |
| 1                | 6                | 0              | 1.393481                | 0.880304  | -0.834736 |
| 2                | 6                | 0              | 2.736459                | 0.910364  | -0.779910 |
| 3                | 6                | 0              | 3.501953                | -0.297174 | -0.455921 |
| 4                | 6                | 0              | 2.710971                | -1.529588 | -0.522654 |
| 5                | 6                | 0              | 1.368830                | -1.483842 | -0.586758 |
| 6                | 7                | 0              | 0.669545                | -0.291787 | -0.686305 |
| 7                | 1                | 0              | 0.797294                | 1.766030  | -1.018311 |
| 8                | 1                | 0              | 3.267545                | 1.842848  | -0.920602 |
| 9                | 1                | 0              | 3.222410                | -2.481710 | -0.465462 |
| 10               | 1                | 0              | 0.753967                | -2.375797 | -0.584381 |
| 11               | 6                | 0              | 4.795409                | -0.380716 | -1.119394 |
| 12               | 7                | 0              | 5.788266                | -0.453261 | -1.707753 |
| 13               | 5                | 0              | -0.777761               | -0.279710 | -0.715787 |
| 14               | 8                | 0              | -1.521439               | -1.410561 | -0.554886 |
| 15               | 8                | 0              | -1.495644               | 0.862439  | -0.910646 |
| 16               | 6                | 0              | -2.882239               | -1.034213 | -0.892848 |
| 17               | 6                | 0              | -2.874568               | 0.509084  | -0.624821 |
| 18               | 6                | 0              | -3.839663               | -1.826426 | -0.020225 |
| 19               | 1                | 0              | -4.868651               | -1.493000 | -0.186080 |
| 20               | 1                | 0              | -3.777804               | -2.886201 | -0.278066 |
| 21               | 1                | 0              | -3.598071               | -1.716031 | 1.037595  |
| 22               | 6                | 0              | -3.082162               | -1.377715 | -2.366229 |
| 23               | 1                | 0              | -2.865565               | -2.438049 | -2.513426 |
| 24               | 1                | 0              | -4.110129               | -1.184227 | -2.683090 |
| 25               | 1                | 0              | -2.406103               | -0.796566 | -3.000165 |

|    |    |   |           |           |           |
|----|----|---|-----------|-----------|-----------|
| 26 | 6  | 0 | -3.784992 | 1.316928  | -1.532674 |
| 27 | 1  | 0 | -4.824993 | 1.001286  | -1.405186 |
| 28 | 1  | 0 | -3.714730 | 2.375562  | -1.272373 |
| 29 | 1  | 0 | -3.506526 | 1.201950  | -2.580971 |
| 30 | 6  | 0 | -3.124120 | 0.856179  | 0.840065  |
| 31 | 1  | 0 | -2.895472 | 1.912712  | 0.995699  |
| 32 | 1  | 0 | -4.166390 | 0.679688  | 1.117767  |
| 33 | 1  | 0 | -2.481713 | 0.264692  | 1.498842  |
| 34 | 53 | 0 | 4.241553  | -0.062655 | 1.840826  |

---

### CF<sub>3</sub> radical

|                                              |                             |
|----------------------------------------------|-----------------------------|
| Zero-point correction=                       | 0.012690 (Hartree/Particle) |
| Thermal correction to Energy=                | 0.016102                    |
| Thermal correction to Enthalpy=              | 0.017046                    |
| Thermal correction to Gibbs Free Energy=     | -0.013995                   |
| Sum of electronic and zero-point Energies=   | -337.425185                 |
| Sum of electronic and thermal Energies=      | -337.421773                 |
| Sum of electronic and thermal Enthalpies=    | -337.420829                 |
| Sum of electronic and thermal Free Energies= | -337.451870                 |

Esol = -337.5898162

---

| Center<br>Number | Atomic<br>Number | Atomic<br>Type | Coordinates (Angstroms) |           |           |
|------------------|------------------|----------------|-------------------------|-----------|-----------|
|                  |                  |                | X                       | Y         | Z         |
| 1                | 6                | 0              | 0.477950                | -0.276754 | 0.025720  |
| 2                | 9                | 0              | 0.935391                | 0.369695  | 1.078557  |
| 3                | 9                | 0              | 0.935457                | -1.511919 | -0.007741 |
| 4                | 9                | 0              | -0.838805               | -0.257324 | -0.007879 |

---

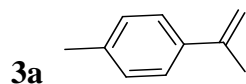

|                                            |                             |
|--------------------------------------------|-----------------------------|
| Zero-point correction=                     | 0.190866 (Hartree/Particle) |
| Thermal correction to Energy=              | 0.200724                    |
| Thermal correction to Enthalpy=            | 0.201668                    |
| Thermal correction to Gibbs Free Energy=   | 0.155120                    |
| Sum of electronic and zero-point Energies= | -387.916954                 |



Sum of electronic and thermal Energies= -387.907096  
 Sum of electronic and thermal Enthalpies= -387.906152  
 Sum of electronic and thermal Free Energies= -387.952700

Esol = -388.2364733

| Center<br>Number | Atomic<br>Number | Atomic<br>Type | Coordinates (Angstroms) |           |           |
|------------------|------------------|----------------|-------------------------|-----------|-----------|
|                  |                  |                | X                       | Y         | Z         |
| 1                | 6                | 0              | -2.192137               | -0.607695 | -0.538838 |
| 2                | 6                | 0              | -0.806015               | -0.640159 | -0.515333 |
| 3                | 6                | 0              | -0.065449               | 0.411851  | 0.042856  |
| 4                | 6                | 0              | -0.776189               | 1.478533  | 0.601383  |
| 5                | 6                | 0              | -2.167770               | 1.508663  | 0.574137  |
| 6                | 6                | 0              | -2.900382               | 0.471272  | 0.000733  |
| 7                | 1                | 0              | -2.740352               | -1.441348 | -0.970796 |
| 8                | 1                | 0              | -0.284891               | -1.507066 | -0.909297 |
| 9                | 1                | 0              | -0.241495               | 2.305760  | 1.057185  |
| 10               | 1                | 0              | -2.692781               | 2.354784  | 1.009594  |
| 11               | 6                | 0              | 1.421064                | 0.387475  | 0.056289  |
| 12               | 6                | 0              | 2.122236                | -0.274903 | -0.868562 |
| 13               | 1                | 0              | 3.206530                | -0.301171 | -0.834808 |
| 14               | 1                | 0              | 1.643621                | -0.789566 | -1.694787 |
| 15               | 6                | 0              | 2.116915                | 1.159923  | 1.148632  |
| 16               | 1                | 0              | 1.707570                | 0.909042  | 2.132008  |
| 17               | 1                | 0              | 3.187907                | 0.949965  | 1.148888  |
| 18               | 1                | 0              | 1.990185                | 2.239172  | 1.011029  |
| 19               | 6                | 0              | -4.406113               | 0.501271  | -0.042925 |
| 20               | 1                | 0              | -4.804648               | 1.306663  | 0.577847  |
| 21               | 1                | 0              | -4.765286               | 0.657340  | -1.065229 |
| 22               | 1                | 0              | -4.830191               | -0.442712 | 0.310830  |

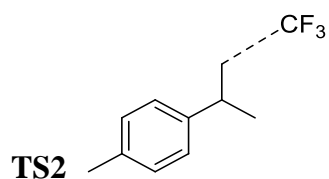

Zero-point correction= 0.203710 (Hartree/Particle)  
 Thermal correction to Energy= 0.218171  
 Thermal correction to Enthalpy= 0.219115

Thermal correction to Gibbs Free Energy= 0.158546  
 Sum of electronic and zero-point Energies= -725.347459  
 Sum of electronic and thermal Energies= -725.332998  
 Sum of electronic and thermal Enthalpies= -725.332054  
 Sum of electronic and thermal Free Energies= -725.392623

Esol = -725.8294859

| Center<br>Number | Atomic<br>Number | Atomic<br>Type | Coordinates (Angstroms) |           |           |
|------------------|------------------|----------------|-------------------------|-----------|-----------|
|                  |                  |                | X                       | Y         | Z         |
| 1                | 6                | 0              | -0.361868               | -1.562230 | 1.374790  |
| 2                | 6                | 0              | 0.726134                | -0.978167 | 0.743905  |
| 3                | 6                | 0              | 0.673829                | 0.351250  | 0.296105  |
| 4                | 6                | 0              | -0.523332               | 1.052684  | 0.480602  |
| 5                | 6                | 0              | -1.609689               | 0.463022  | 1.118282  |
| 6                | 6                | 0              | -1.548242               | -0.850851 | 1.581357  |
| 7                | 1                | 0              | -0.298039               | -2.597007 | 1.701644  |
| 8                | 1                | 0              | 1.617047                | -1.571703 | 0.563467  |
| 9                | 1                | 0              | -0.609391               | 2.077175  | 0.132904  |
| 10               | 1                | 0              | -2.523926               | 1.034290  | 1.255514  |
| 11               | 6                | 0              | 1.832940                | 0.980147  | -0.373589 |
| 12               | 6                | 0              | 3.093414                | 0.547871  | -0.156445 |
| 13               | 1                | 0              | 3.935971                | 1.031141  | -0.641333 |
| 14               | 1                | 0              | 3.324567                | -0.172634 | 0.621461  |
| 15               | 6                | 0              | 1.562119                | 2.083923  | -1.360027 |
| 16               | 1                | 0              | 1.172016                | 2.977683  | -0.861111 |
| 17               | 1                | 0              | 2.475791                | 2.369526  | -1.884477 |
| 18               | 1                | 0              | 0.815744                | 1.770942  | -2.097186 |
| 19               | 6                | 0              | -2.715693               | -1.490125 | 2.286717  |
| 20               | 1                | 0              | -2.530156               | -1.561309 | 3.363415  |
| 21               | 1                | 0              | -3.630785               | -0.911338 | 2.143738  |
| 22               | 1                | 0              | -2.892105               | -2.504350 | 1.918318  |
| 23               | 6                | 0              | 3.190396                | -1.297887 | -1.781204 |
| 24               | 9                | 0              | 3.311369                | -2.438763 | -1.112357 |
| 25               | 9                | 0              | 2.021251                | -1.255511 | -2.395484 |
| 26               | 9                | 0              | 4.174206                | -1.181283 | -2.658966 |

**Int4**

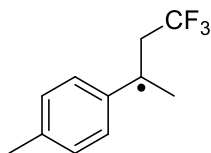

|                                              |                             |
|----------------------------------------------|-----------------------------|
| Zero-point correction=                       | 0.206938 (Hartree/Particle) |
| Thermal correction to Energy=                | 0.219764                    |
| Thermal correction to Enthalpy=              | 0.220708                    |
| Thermal correction to Gibbs Free Energy=     | 0.165924                    |
| Sum of electronic and zero-point Energies=   | -725.419174                 |
| Sum of electronic and thermal Energies=      | -725.406348                 |
| Sum of electronic and thermal Enthalpies=    | -725.405403                 |
| Sum of electronic and thermal Free Energies= | -725.460187                 |

Esol = -725.9015591

| Center Number | Atomic Number | Atomic Type | Coordinates (Angstroms) |           |           |
|---------------|---------------|-------------|-------------------------|-----------|-----------|
|               |               |             | X                       | Y         | Z         |
| 1             | 6             | 0           | -0.342146               | -1.793973 | 1.254712  |
| 2             | 6             | 0           | 0.730181                | -1.265287 | 0.561420  |
| 3             | 6             | 0           | 0.664067                | 0.024360  | -0.025144 |
| 4             | 6             | 0           | -0.555401               | 0.728087  | 0.124861  |
| 5             | 6             | 0           | -1.620716               | 0.185291  | 0.824717  |
| 6             | 6             | 0           | -1.540661               | -1.083198 | 1.405813  |
| 7             | 1             | 0           | -0.257956               | -2.788261 | 1.686379  |
| 8             | 1             | 0           | 1.621893                | -1.869459 | 0.438294  |
| 9             | 1             | 0           | -0.656513               | 1.721125  | -0.299932 |
| 10            | 1             | 0           | -2.538216               | 0.758912  | 0.927239  |
| 11            | 6             | 0           | 1.761437                | 0.604145  | -0.734246 |
| 12            | 6             | 0           | 3.121622                | -0.029297 | -0.732426 |
| 13            | 1             | 0           | 3.900992                | 0.738503  | -0.779554 |
| 14            | 1             | 0           | 3.306370                | -0.628497 | 0.162790  |
| 15            | 6             | 0           | 1.601214                | 1.887151  | -1.492695 |
| 16            | 1             | 0           | 1.491966                | 2.748439  | -0.818695 |
| 17            | 1             | 0           | 2.465740                | 2.072203  | -2.132519 |
| 18            | 1             | 0           | 0.712829                | 1.867652  | -2.132645 |
| 19            | 6             | 0           | -2.702302               | -1.684014 | 2.150758  |
| 20            | 1             | 0           | -3.487190               | -0.944620 | 2.324156  |
| 21            | 1             | 0           | -3.142662               | -2.513982 | 1.588211  |
| 22            | 1             | 0           | -2.387627               | -2.080251 | 3.120621  |
| 23            | 6             | 0           | 3.347812                | -0.932792 | -1.925498 |
| 24            | 9             | 0           | 2.500744                | -1.972422 | -1.930478 |

|    |   |   |          |           |           |
|----|---|---|----------|-----------|-----------|
| 25 | 9 | 0 | 3.176531 | -0.273117 | -3.082120 |
| 26 | 9 | 0 | 4.593500 | -1.431919 | -1.930839 |

---

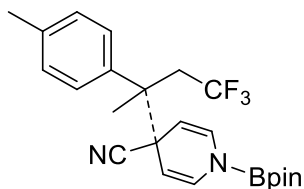

**TS3**

|                                              |                             |
|----------------------------------------------|-----------------------------|
| Zero-point correction=                       | 0.482086 (Hartree/Particle) |
| Thermal correction to Energy=                | 0.512671                    |
| Thermal correction to Enthalpy=              | 0.513615                    |
| Thermal correction to Gibbs Free Energy=     | 0.417978                    |
| Sum of electronic and zero-point Energies=   | -1476.684014                |
| Sum of electronic and thermal Energies=      | -1476.653429                |
| Sum of electronic and thermal Enthalpies=    | -1476.652485                |
| Sum of electronic and thermal Free Energies= | -1476.748122                |

Esol = -1477.7062327

---

| Center<br>Number | Atomic<br>Number | Atomic<br>Type | Coordinates (Angstroms) |           |           |
|------------------|------------------|----------------|-------------------------|-----------|-----------|
|                  |                  |                | X                       | Y         | Z         |
| 1                | 6                | 0              | -4.106907               | 2.439404  | 0.432584  |
| 2                | 6                | 0              | -3.772324               | 1.098874  | 0.393780  |
| 3                | 6                | 0              | -2.643834               | 0.644528  | -0.333729 |
| 4                | 6                | 0              | -1.899083               | 1.625633  | -1.028875 |
| 5                | 6                | 0              | -2.254288               | 2.967468  | -0.988743 |
| 6                | 6                | 0              | -3.358529               | 3.404706  | -0.256296 |
| 7                | 1                | 0              | -4.973558               | 2.752598  | 1.009220  |
| 8                | 1                | 0              | -4.383489               | 0.394116  | 0.944880  |
| 9                | 1                | 0              | -1.036274               | 1.329958  | -1.615326 |
| 10               | 1                | 0              | -1.661741               | 3.692420  | -1.541285 |
| 11               | 6                | 0              | -2.214612               | -0.726955 | -0.312771 |
| 12               | 6                | 0              | -3.113400               | -1.816208 | 0.196070  |
| 13               | 1                | 0              | -2.523432               | -2.698810 | 0.466610  |
| 14               | 1                | 0              | -3.683521               | -1.524385 | 1.082090  |
| 15               | 6                | 0              | -1.044178               | -1.155479 | -1.141333 |
| 16               | 1                | 0              | -0.165200               | -0.528286 | -0.947315 |
| 17               | 1                | 0              | -0.770972               | -2.191612 | -0.928865 |
| 18               | 1                | 0              | -1.267629               | -1.086108 | -2.214278 |

|    |   |   |           |           |           |
|----|---|---|-----------|-----------|-----------|
| 19 | 6 | 0 | -3.757625 | 4.855762  | -0.219358 |
| 20 | 1 | 0 | -4.697591 | 5.018372  | -0.756989 |
| 21 | 1 | 0 | -3.909460 | 5.197873  | 0.808681  |
| 22 | 1 | 0 | -2.995694 | 5.488847  | -0.679697 |
| 23 | 6 | 0 | -4.106941 | -2.274494 | -0.848198 |
| 24 | 9 | 0 | -4.950448 | -1.295775 | -1.202726 |
| 25 | 9 | 0 | -3.490750 | -2.692925 | -1.968862 |
| 26 | 9 | 0 | -4.848530 | -3.299725 | -0.399750 |
| 27 | 6 | 0 | 1.421164  | -1.433161 | 1.284384  |
| 28 | 6 | 0 | 0.176744  | -1.550948 | 1.801739  |
| 29 | 6 | 0 | -0.687419 | -0.408901 | 1.893470  |
| 30 | 6 | 0 | -0.135478 | 0.853565  | 1.493579  |
| 31 | 6 | 0 | 1.110951  | 0.921903  | 0.971569  |
| 32 | 7 | 0 | 1.927172  | -0.205097 | 0.856615  |
| 33 | 1 | 0 | 2.102644  | -2.268141 | 1.182706  |
| 34 | 1 | 0 | -0.168341 | -2.520913 | 2.140794  |
| 35 | 1 | 0 | -0.731854 | 1.754455  | 1.575274  |
| 36 | 1 | 0 | 1.559206  | 1.847381  | 0.632558  |
| 37 | 6 | 0 | -1.892143 | -0.464384 | 2.637811  |
| 38 | 7 | 0 | -2.898837 | -0.517925 | 3.219626  |
| 39 | 5 | 0 | 3.257154  | -0.103022 | 0.313068  |
| 40 | 8 | 0 | 3.809746  | 1.088648  | -0.066943 |
| 41 | 8 | 0 | 4.064858  | -1.191454 | 0.131735  |
| 42 | 6 | 0 | 5.021234  | 0.746486  | -0.785706 |
| 43 | 6 | 0 | 5.373882  | -0.658118 | -0.189775 |
| 44 | 6 | 0 | 6.061277  | 1.824203  | -0.533729 |
| 45 | 1 | 0 | 7.017225  | 1.543911  | -0.986805 |
| 46 | 1 | 0 | 5.731332  | 2.763033  | -0.984623 |
| 47 | 1 | 0 | 6.210825  | 1.990391  | 0.533850  |
| 48 | 6 | 0 | 4.655664  | 0.684066  | -2.266418 |
| 49 | 1 | 0 | 4.219536  | 1.640849  | -2.561927 |
| 50 | 1 | 0 | 5.535895  | 0.495019  | -2.886290 |
| 51 | 1 | 0 | 3.919749  | -0.103071 | -2.455063 |
| 52 | 6 | 0 | 6.064296  | -1.604293 | -1.156575 |
| 53 | 1 | 0 | 7.015057  | -1.178573 | -1.491950 |
| 54 | 1 | 0 | 6.272088  | -2.552217 | -0.654753 |
| 55 | 1 | 0 | 5.440467  | -1.807162 | -2.028016 |
| 56 | 6 | 0 | 6.149425  | -0.564993 | 1.121629  |
| 57 | 1 | 0 | 6.173375  | -1.552829 | 1.587024  |
| 58 | 1 | 0 | 7.177215  | -0.232985 | 0.953628  |
| 59 | 1 | 0 | 5.666032  | 0.130367  | 1.814051  |

---

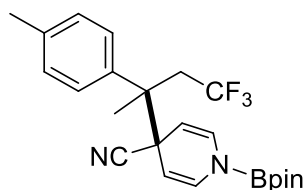

**Int5**

Zero-point correction= 0.486587 (Hartree/Particle)  
 Thermal correction to Energy= 0.516472  
 Thermal correction to Enthalpy= 0.517416  
 Thermal correction to Gibbs Free Energy= 0.424399  
 Sum of electronic and zero-point Energies= -1476.730969  
 Sum of electronic and thermal Energies= -1476.701084  
 Sum of electronic and thermal Enthalpies= -1476.700140  
 Sum of electronic and thermal Free Energies= -1476.793157

Esol= -1477.7533334

| Center Number | Atomic Number | Atomic Type | Coordinates (Angstroms) |           |           |
|---------------|---------------|-------------|-------------------------|-----------|-----------|
|               |               |             | X                       | Y         | Z         |
| 1             | 6             | 0           | 7.704005                | 0.964369  | -3.971408 |
| 2             | 6             | 0           | 6.621777                | 1.368646  | -3.199504 |
| 3             | 6             | 0           | 6.004633                | 0.491535  | -2.297857 |
| 4             | 6             | 0           | 6.527230                | -0.801478 | -2.204424 |
| 5             | 6             | 0           | 7.610679                | -1.203421 | -2.980523 |
| 6             | 6             | 0           | 8.217557                | -0.330552 | -3.881290 |
| 7             | 1             | 0           | 8.158586                | 1.672856  | -4.658917 |
| 8             | 1             | 0           | 6.275577                | 2.390821  | -3.303295 |
| 9             | 1             | 0           | 6.093928                | -1.516343 | -1.514457 |
| 10            | 1             | 0           | 7.989334                | -2.217390 | -2.880933 |
| 11            | 6             | 0           | 4.852849                | 0.947454  | -1.393719 |
| 12            | 6             | 0           | 3.854619                | 1.844111  | -2.154951 |
| 13            | 1             | 0           | 3.131682                | 2.277054  | -1.456783 |
| 14            | 1             | 0           | 4.359446                | 2.677421  | -2.647203 |
| 15            | 6             | 0           | 4.106774                | -0.243131 | -0.776920 |
| 16            | 1             | 0           | 4.724481                | -0.741033 | -0.024920 |
| 17            | 1             | 0           | 3.190101                | 0.092694  | -0.289007 |
| 18            | 1             | 0           | 3.837993                | -0.967137 | -1.548687 |
| 19            | 6             | 0           | 9.369716                | -0.770198 | -4.746613 |
| 20            | 1             | 0           | 9.873500                | -1.641878 | -4.322597 |
| 21            | 1             | 0           | 9.022956                | -1.041797 | -5.748976 |
| 22            | 1             | 0           | 10.106167               | 0.029430  | -4.860182 |
| 23            | 6             | 0           | 3.026346                | 1.149669  | -3.211527 |

|    |   |   |          |           |           |
|----|---|---|----------|-----------|-----------|
| 24 | 9 | 0 | 3.754168 | 0.385654  | -4.034793 |
| 25 | 9 | 0 | 2.077840 | 0.358841  | -2.676505 |
| 26 | 9 | 0 | 2.386556 | 2.057786  | -3.967010 |
| 27 | 6 | 0 | 4.438027 | 1.621366  | 2.099524  |
| 28 | 6 | 0 | 4.423318 | 2.140181  | 0.869318  |
| 29 | 6 | 0 | 5.466237 | 1.805243  | -0.180947 |
| 30 | 6 | 0 | 6.611221 | 1.061210  | 0.479372  |
| 31 | 6 | 0 | 6.544456 | 0.581415  | 1.722872  |
| 32 | 7 | 0 | 5.446237 | 0.777201  | 2.565063  |
| 33 | 1 | 0 | 3.666810 | 1.845722  | 2.827708  |
| 34 | 1 | 0 | 3.632988 | 2.834492  | 0.608719  |
| 35 | 1 | 0 | 7.508898 | 0.902135  | -0.105154 |
| 36 | 1 | 0 | 7.358363 | 0.020543  | 2.167982  |
| 37 | 6 | 0 | 5.984787 | 3.084776  | -0.721340 |
| 38 | 7 | 0 | 6.361270 | 4.097803  | -1.133671 |
| 39 | 5 | 0 | 5.404065 | 0.219698  | 3.883890  |
| 40 | 8 | 0 | 6.427484 | -0.523851 | 4.409717  |
| 41 | 8 | 0 | 4.337348 | 0.388723  | 4.727090  |
| 42 | 6 | 0 | 5.910416 | -1.096188 | 5.634708  |
| 43 | 6 | 0 | 4.780727 | -0.083550 | 6.021638  |
| 44 | 6 | 0 | 7.042039 | -1.202543 | 6.642438  |
| 45 | 1 | 0 | 6.659918 | -1.541615 | 7.610357  |
| 46 | 1 | 0 | 7.777437 | -1.930135 | 6.290973  |
| 47 | 1 | 0 | 7.545375 | -0.244226 | 6.776693  |
| 48 | 6 | 0 | 5.367238 | -2.479703 | 5.286031  |
| 49 | 1 | 0 | 6.165709 | -3.064715 | 4.824198  |
| 50 | 1 | 0 | 5.017951 | -3.007320 | 6.177441  |
| 51 | 1 | 0 | 4.538696 | -2.406361 | 4.575562  |
| 52 | 6 | 0 | 3.598091 | -0.696983 | 6.751355  |
| 53 | 1 | 0 | 3.923884 | -1.148937 | 7.693384  |
| 54 | 1 | 0 | 2.866405 | 0.081393  | 6.980404  |
| 55 | 1 | 0 | 3.108617 | -1.459195 | 6.143724  |
| 56 | 6 | 0 | 5.312472 | 1.129440  | 6.781128  |
| 57 | 1 | 0 | 4.526360 | 1.886219  | 6.830039  |
| 58 | 1 | 0 | 5.606387 | 0.864267  | 7.800101  |
| 59 | 1 | 0 | 6.176577 | 1.563262  | 6.269489  |

---

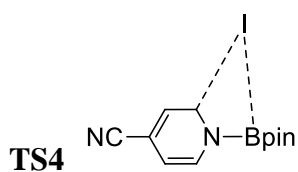

Zero-point correction=

0.275165 (Hartree/Particle)

|                                              |             |
|----------------------------------------------|-------------|
| Thermal correction to Energy=                | 0.292695    |
| Thermal correction to Enthalpy=              | 0.293639    |
| Thermal correction to Gibbs Free Energy=     | 0.228582    |
| Sum of electronic and zero-point Energies=   | -762.593986 |
| Sum of electronic and thermal Energies=      | -762.576456 |
| Sum of electronic and thermal Enthalpies=    | -762.575512 |
| Sum of electronic and thermal Free Energies= | -762.640570 |

Esol = -763.1522273

| Center<br>Number | Atomic<br>Number | Atomic<br>Type | Coordinates (Angstroms) |           |           |
|------------------|------------------|----------------|-------------------------|-----------|-----------|
|                  |                  |                | X                       | Y         | Z         |
| 1                | 6                | 0              | 1.392252                | 0.846388  | -0.583086 |
| 2                | 6                | 0              | 2.777818                | 0.844172  | -0.649114 |
| 3                | 6                | 0              | 3.432775                | -0.365252 | -0.857800 |
| 4                | 6                | 0              | 2.696237                | -1.552984 | -1.004338 |
| 5                | 6                | 0              | 1.323157                | -1.477589 | -0.969710 |
| 6                | 7                | 0              | 0.699924                | -0.293971 | -0.797635 |
| 7                | 1                | 0              | 0.802295                | 1.736944  | -0.413070 |
| 8                | 1                | 0              | 3.328588                | 1.764248  | -0.504454 |
| 9                | 1                | 0              | 3.191961                | -2.504633 | -1.141927 |
| 10               | 1                | 0              | 0.672768                | -2.339163 | -1.059329 |
| 11               | 6                | 0              | 4.869430                | -0.404340 | -0.923474 |
| 12               | 7                | 0              | 6.022982                | -0.439557 | -0.991819 |
| 13               | 5                | 0              | -0.797659               | -0.260719 | -0.603700 |
| 14               | 8                | 0              | -1.499071               | -1.411802 | -0.523868 |
| 15               | 8                | 0              | -1.490819               | 0.867923  | -0.858930 |
| 16               | 6                | 0              | -2.875098               | -1.047222 | -0.843741 |
| 17               | 6                | 0              | -2.887638               | 0.511793  | -0.621410 |
| 18               | 6                | 0              | -3.801642               | -1.820544 | 0.076625  |
| 19               | 1                | 0              | -4.838452               | -1.508493 | -0.081458 |
| 20               | 1                | 0              | -3.727147               | -2.888261 | -0.142624 |
| 21               | 1                | 0              | -3.536723               | -1.662202 | 1.122354  |
| 22               | 6                | 0              | -3.090571               | -1.448560 | -2.299517 |
| 23               | 1                | 0              | -2.887470               | -2.516716 | -2.405599 |
| 24               | 1                | 0              | -4.119314               | -1.257757 | -2.615035 |
| 25               | 1                | 0              | -2.415362               | -0.900214 | -2.963022 |
| 26               | 6                | 0              | -3.744799               | 1.279900  | -1.613012 |
| 27               | 1                | 0              | -4.790479               | 0.969758  | -1.525218 |
| 28               | 1                | 0              | -3.686434               | 2.347109  | -1.388334 |
| 29               | 1                | 0              | -3.414852               | 1.124810  | -2.641277 |



|    |    |   |           |          |          |
|----|----|---|-----------|----------|----------|
| 30 | 6  | 0 | -3.224671 | 0.917081 | 0.807837 |
| 31 | 1  | 0 | -3.024731 | 1.984622 | 0.924669 |
| 32 | 1  | 0 | -4.281298 | 0.732084 | 1.020051 |
| 33 | 1  | 0 | -2.603860 | 0.389176 | 1.535499 |
| 34 | 53 | 0 | 0.323088  | 0.400311 | 2.366189 |

---

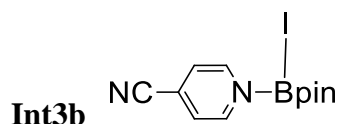

|                                              |                             |
|----------------------------------------------|-----------------------------|
| Zero-point correction=                       | 0.274903 (Hartree/Particle) |
| Thermal correction to Energy=                | 0.292892                    |
| Thermal correction to Enthalpy=              | 0.293836                    |
| Thermal correction to Gibbs Free Energy=     | 0.227883                    |
| Sum of electronic and zero-point Energies=   | -762.608633                 |
| Sum of electronic and thermal Energies=      | -762.590644                 |
| Sum of electronic and thermal Enthalpies=    | -762.589700                 |
| Sum of electronic and thermal Free Energies= | -762.655653                 |

Esol = -763.1611282

---

| Center<br>Number | Atomic<br>Number | Atomic<br>Type | Coordinates (Angstroms) |           |           |
|------------------|------------------|----------------|-------------------------|-----------|-----------|
|                  |                  |                | X                       | Y         | Z         |
| 1                | 6                | 0              | 1.255771                | 0.856533  | -0.685721 |
| 2                | 6                | 0              | 2.518009                | 0.790752  | -1.248180 |
| 3                | 6                | 0              | 3.121903                | -0.462545 | -1.380663 |
| 4                | 6                | 0              | 2.446331                | -1.608537 | -0.954041 |
| 5                | 6                | 0              | 1.186016                | -1.461913 | -0.401576 |
| 6                | 7                | 0              | 0.627104                | -0.251953 | -0.272468 |
| 7                | 1                | 0              | 0.706952                | 1.780796  | -0.543243 |
| 8                | 1                | 0              | 3.021893                | 1.690748  | -1.576976 |
| 9                | 1                | 0              | 2.893777                | -2.589398 | -1.052328 |
| 10               | 1                | 0              | 0.581970                | -2.288496 | -0.043733 |
| 11               | 6                | 0              | 4.434679                | -0.573000 | -1.961858 |
| 12               | 7                | 0              | 5.486759                | -0.662156 | -2.432337 |
| 13               | 5                | 0              | -0.835155               | -0.128050 | 0.409534  |
| 14               | 8                | 0              | -1.573074               | -1.309789 | 0.235426  |
| 15               | 8                | 0              | -1.494234               | 0.974467  | -0.155148 |
| 16               | 6                | 0              | -2.654917               | -0.982813 | -0.656598 |

|    |    |   |           |           |           |
|----|----|---|-----------|-----------|-----------|
| 17 | 6  | 0 | -2.846416 | 0.545750  | -0.395772 |
| 18 | 6  | 0 | -3.855818 | -1.844292 | -0.303208 |
| 19 | 1  | 0 | -4.730604 | -1.544526 | -0.889331 |
| 20 | 1  | 0 | -3.636866 | -2.891798 | -0.526146 |
| 21 | 1  | 0 | -4.092978 | -1.763052 | 0.758178  |
| 22 | 6  | 0 | -2.187382 | -1.273154 | -2.083747 |
| 23 | 1  | 0 | -1.848317 | -2.311218 | -2.139159 |
| 24 | 1  | 0 | -2.992272 | -1.133114 | -2.810674 |
| 25 | 1  | 0 | -1.354583 | -0.618540 | -2.360725 |
| 26 | 6  | 0 | -3.399225 | 1.326448  | -1.577603 |
| 27 | 1  | 0 | -4.385335 | 0.945425  | -1.861746 |
| 28 | 1  | 0 | -3.506867 | 2.378425  | -1.301840 |
| 29 | 1  | 0 | -2.734628 | 1.264908  | -2.441254 |
| 30 | 6  | 0 | -3.669558 | 0.824049  | 0.860898  |
| 31 | 1  | 0 | -3.561945 | 1.879802  | 1.120742  |
| 32 | 1  | 0 | -4.729175 | 0.607940  | 0.696235  |
| 33 | 1  | 0 | -3.308963 | 0.230612  | 1.705090  |
| 34 | 53 | 0 | -0.206104 | 0.163192  | 2.674290  |

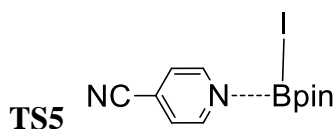

|                                              |                             |
|----------------------------------------------|-----------------------------|
| Zero-point correction=                       | 0.275165 (Hartree/Particle) |
| Thermal correction to Energy=                | 0.292695                    |
| Thermal correction to Enthalpy=              | 0.293639                    |
| Thermal correction to Gibbs Free Energy=     | 0.228582                    |
| Sum of electronic and zero-point Energies=   | -762.593986                 |
| Sum of electronic and thermal Energies=      | -762.576456                 |
| Sum of electronic and thermal Enthalpies=    | -762.575512                 |
| Sum of electronic and thermal Free Energies= | -762.640570                 |

Esol = -763.1522273

| Center Number | Atomic Number | Atomic Type | Coordinates (Angstroms) |           |           |
|---------------|---------------|-------------|-------------------------|-----------|-----------|
|               |               |             | X                       | Y         | Z         |
| 1             | 6             | 0           | 1.392252                | 0.846388  | -0.583086 |
| 2             | 6             | 0           | 2.777818                | 0.844172  | -0.649114 |
| 3             | 6             | 0           | 3.432775                | -0.365252 | -0.857800 |

|    |    |   |           |           |           |
|----|----|---|-----------|-----------|-----------|
| 4  | 6  | 0 | 2.696237  | -1.552984 | -1.004338 |
| 5  | 6  | 0 | 1.323157  | -1.477589 | -0.969710 |
| 6  | 7  | 0 | 0.699924  | -0.293971 | -0.797635 |
| 7  | 1  | 0 | 0.802295  | 1.736944  | -0.413070 |
| 8  | 1  | 0 | 3.328588  | 1.764248  | -0.504454 |
| 9  | 1  | 0 | 3.191961  | -2.504633 | -1.141927 |
| 10 | 1  | 0 | 0.672768  | -2.339163 | -1.059329 |
| 11 | 6  | 0 | 4.869430  | -0.404340 | -0.923474 |
| 12 | 7  | 0 | 6.022982  | -0.439557 | -0.991819 |
| 13 | 5  | 0 | -0.797659 | -0.260719 | -0.603700 |
| 14 | 8  | 0 | -1.499071 | -1.411802 | -0.523868 |
| 15 | 8  | 0 | -1.490819 | 0.867923  | -0.858930 |
| 16 | 6  | 0 | -2.875098 | -1.047222 | -0.843741 |
| 17 | 6  | 0 | -2.887638 | 0.511793  | -0.621410 |
| 18 | 6  | 0 | -3.801642 | -1.820544 | 0.076625  |
| 19 | 1  | 0 | -4.838452 | -1.508493 | -0.081458 |
| 20 | 1  | 0 | -3.727147 | -2.888261 | -0.142624 |
| 21 | 1  | 0 | -3.536723 | -1.662202 | 1.122354  |
| 22 | 6  | 0 | -3.090571 | -1.448560 | -2.299517 |
| 23 | 1  | 0 | -2.887470 | -2.516716 | -2.405599 |
| 24 | 1  | 0 | -4.119314 | -1.257757 | -2.615035 |
| 25 | 1  | 0 | -2.415362 | -0.900214 | -2.963022 |
| 26 | 6  | 0 | -3.744799 | 1.279900  | -1.613012 |
| 27 | 1  | 0 | -4.790479 | 0.969758  | -1.525218 |
| 28 | 1  | 0 | -3.686434 | 2.347109  | -1.388334 |
| 29 | 1  | 0 | -3.414852 | 1.124810  | -2.641277 |
| 30 | 6  | 0 | -3.224671 | 0.917081  | 0.807837  |
| 31 | 1  | 0 | -3.024731 | 1.984622  | 0.924669  |
| 32 | 1  | 0 | -4.281298 | 0.732084  | 1.020051  |
| 33 | 1  | 0 | -2.603860 | 0.389176  | 1.535499  |
| 34 | 53 | 0 | 0.323088  | 0.400311  | 2.366189  |

---

### IBpin

|                                              |                             |
|----------------------------------------------|-----------------------------|
| Zero-point correction=                       | 0.183964 (Hartree/Particle) |
| Thermal correction to Energy=                | 0.194929                    |
| Thermal correction to Enthalpy=              | 0.195873                    |
| Thermal correction to Gibbs Free Energy=     | 0.146765                    |
| Sum of electronic and zero-point Energies=   | -422.284105                 |
| Sum of electronic and thermal Energies=      | -422.273140                 |
| Sum of electronic and thermal Enthalpies=    | -422.272196                 |
| Sum of electronic and thermal Free Energies= | -422.321304                 |

Esol = -422.6251154

---

| Center<br>Number | Atomic<br>Number | Atomic<br>Type | Coordinates (Angstroms) |           |           |
|------------------|------------------|----------------|-------------------------|-----------|-----------|
|                  |                  |                | X                       | Y         | Z         |
| 1                | 5                | 0              | -0.790690               | -0.321589 | -0.863066 |
| 2                | 8                | 0              | -1.534671               | -1.437301 | -0.663009 |
| 3                | 8                | 0              | -1.493739               | 0.828967  | -1.005479 |
| 4                | 6                | 0              | -2.911756               | -1.041421 | -0.914209 |
| 5                | 6                | 0              | -2.864705               | 0.498682  | -0.648135 |
| 6                | 6                | 0              | -3.820716               | -1.823874 | 0.016874  |
| 7                | 1                | 0              | -4.855171               | -1.481980 | -0.087847 |
| 8                | 1                | 0              | -3.781933               | -2.884489 | -0.241621 |
| 9                | 1                | 0              | -3.515018               | -1.713320 | 1.057942  |
| 10               | 6                | 0              | -3.203336               | -1.384654 | -2.372069 |
| 11               | 1                | 0              | -3.008744               | -2.447773 | -2.528630 |
| 12               | 1                | 0              | -4.245801               | -1.176941 | -2.627331 |
| 13               | 1                | 0              | -2.556336               | -0.814545 | -3.044868 |
| 14               | 6                | 0              | -3.804268               | 1.324875  | -1.508402 |
| 15               | 1                | 0              | -4.842663               | 1.031644  | -1.324777 |
| 16               | 1                | 0              | -3.696327               | 2.381990  | -1.255266 |
| 17               | 1                | 0              | -3.584244               | 1.202224  | -2.569550 |
| 18               | 6                | 0              | -3.027219               | 0.852871  | 0.827065  |
| 19               | 1                | 0              | -2.771110               | 1.905306  | 0.966238  |
| 20               | 1                | 0              | -4.055844               | 0.694524  | 1.161577  |
| 21               | 1                | 0              | -2.358639               | 0.251535  | 1.449697  |
| 22               | 53               | 0              | 1.358284                | -0.374235 | -0.951483 |

---

#### 4-cyanopyridine

Zero-point correction= 0.088413 (Hartree/Particle)  
Thermal correction to Energy= 0.094380  
Thermal correction to Enthalpy= 0.095324  
Thermal correction to Gibbs Free Energy= 0.058181  
Sum of electronic and zero-point Energies= -340.300304  
Sum of electronic and thermal Energies= -340.294337  
Sum of electronic and thermal Enthalpies= -340.293393  
Sum of electronic and thermal Free Energies= -340.330537

Esol = -340.5096342

| Center<br>Number | Atomic<br>Number | Atomic<br>Type | Coordinates (Angstroms) |           |           |
|------------------|------------------|----------------|-------------------------|-----------|-----------|
|                  |                  |                | X                       | Y         | Z         |
| 1                | 6                | 0              | 1.501787                | 1.140544  | -0.000004 |
| 2                | 6                | 0              | 0.111946                | 1.203226  | 0.000009  |
| 3                | 6                | 0              | -0.594341               | 0.000000  | 0.000000  |
| 4                | 6                | 0              | 0.111946                | -1.203225 | -0.000009 |
| 5                | 6                | 0              | 1.501788                | -1.140543 | 0.000005  |
| 6                | 7                | 0              | 2.193304                | 0.000000  | 0.000000  |
| 7                | 1                | 0              | 2.087034                | 2.056307  | 0.000016  |
| 8                | 1                | 0              | -0.408026               | 2.153948  | 0.000025  |
| 9                | 1                | 0              | -0.408026               | -2.153948 | -0.000024 |
| 10               | 1                | 0              | 2.087034                | -2.056307 | -0.000016 |
| 11               | 6                | 0              | -2.035592               | 0.000000  | 0.000000  |
| 12               | 7                | 0              | -3.192093               | 0.000000  | 0.000000  |

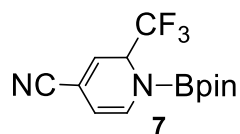

|                                              |                             |
|----------------------------------------------|-----------------------------|
| Zero-point correction=                       | 0.291215 (Hartree/Particle) |
| Thermal correction to Energy=                | 0.311002                    |
| Thermal correction to Enthalpy=              | 0.311946                    |
| Thermal correction to Gibbs Free Energy=     | 0.243296                    |
| Sum of electronic and zero-point Energies=   | -1088.780983                |
| Sum of electronic and thermal Energies=      | -1088.761196                |
| Sum of electronic and thermal Enthalpies=    | -1088.760252                |
| Sum of electronic and thermal Free Energies= | -1088.828902                |

Esol = -1089.484127

| Center<br>Number | Atomic<br>Number | Atomic<br>Type | Coordinates (Angstroms) |           |           |
|------------------|------------------|----------------|-------------------------|-----------|-----------|
|                  |                  |                | X                       | Y         | Z         |
| 1                | 6                | 0              | 1.663492                | 1.220623  | 0.300410  |
| 2                | 6                | 0              | 3.083370                | 1.122599  | -0.191455 |
| 3                | 6                | 0              | 3.713341                | -0.064227 | -0.141742 |
| 4                | 6                | 0              | 3.014414                | -1.283824 | 0.252027  |

|    |   |   |           |           |           |
|----|---|---|-----------|-----------|-----------|
| 5  | 6 | 0 | 1.676328  | -1.232801 | 0.354783  |
| 6  | 7 | 0 | 0.961812  | -0.053527 | 0.193742  |
| 7  | 1 | 0 | 1.103687  | 1.975326  | -0.260317 |
| 8  | 1 | 0 | 3.579824  | 2.019053  | -0.541719 |
| 9  | 1 | 0 | 3.554134  | -2.212893 | 0.364484  |
| 10 | 1 | 0 | 1.063820  | -2.112237 | 0.520984  |
| 11 | 6 | 0 | 5.088311  | -0.162802 | -0.562759 |
| 12 | 7 | 0 | 6.192345  | -0.258946 | -0.894738 |
| 13 | 5 | 0 | -0.467660 | -0.052148 | 0.085770  |
| 14 | 8 | 0 | -1.234116 | -1.173619 | 0.254984  |
| 15 | 8 | 0 | -1.177406 | 1.084413  | -0.195107 |
| 16 | 6 | 0 | -2.576497 | -0.795524 | -0.138445 |
| 17 | 6 | 0 | -2.559838 | 0.754803  | 0.080203  |
| 18 | 6 | 0 | -3.570712 | -1.548436 | 0.728491  |
| 19 | 1 | 0 | -4.590213 | -1.208549 | 0.521338  |
| 20 | 1 | 0 | -3.514479 | -2.616854 | 0.506899  |
| 21 | 1 | 0 | -3.359077 | -1.406105 | 1.789005  |
| 22 | 6 | 0 | -2.737212 | -1.181675 | -1.606274 |
| 23 | 1 | 0 | -2.524841 | -2.247569 | -1.715275 |
| 24 | 1 | 0 | -3.753743 | -0.989907 | -1.959688 |
| 25 | 1 | 0 | -2.036859 | -0.624406 | -2.235123 |
| 26 | 6 | 0 | -3.451547 | 1.540525  | -0.865139 |
| 27 | 1 | 0 | -4.495958 | 1.236534  | -0.744401 |
| 28 | 1 | 0 | -3.376990 | 2.606262  | -0.636433 |
| 29 | 1 | 0 | -3.157597 | 1.391065  | -1.904961 |
| 30 | 6 | 0 | -2.826059 | 1.149348  | 1.531055  |
| 31 | 1 | 0 | -2.574850 | 2.204675  | 1.658429  |
| 32 | 1 | 0 | -3.875560 | 1.001395  | 1.798825  |
| 33 | 1 | 0 | -2.201345 | 0.567754  | 2.214992  |
| 34 | 6 | 0 | 1.636616  | 1.695192  | 1.756015  |
| 35 | 9 | 0 | 2.174150  | 2.917661  | 1.854818  |
| 36 | 9 | 0 | 2.316378  | 0.876395  | 2.562497  |
| 37 | 9 | 0 | 0.376459  | 1.757869  | 2.213953  |

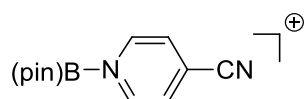

|                                            |                             |
|--------------------------------------------|-----------------------------|
| Zero-point correction=                     | 0.275528 (Hartree/Particle) |
| Thermal correction to Energy=              | 0.291487                    |
| Thermal correction to Enthalpy=            | 0.292431                    |
| Thermal correction to Gibbs Free Energy=   | 0.232592                    |
| Sum of electronic and zero-point Energies= | -751.038204                 |
| Sum of electronic and thermal Energies=    | -751.022246                 |

Sum of electronic and thermal Enthalpies= -751.021302  
 Sum of electronic and thermal Free Energies= -751.081140

Esol = -751.609417

| Center<br>Number | Atomic<br>Number | Atomic<br>Type | Coordinates (Angstroms) |           |           |
|------------------|------------------|----------------|-------------------------|-----------|-----------|
|                  |                  |                | X                       | Y         | Z         |
| 1                | 6                | 0              | 1.645404                | 1.169582  | -0.157746 |
| 2                | 6                | 0              | 3.024294                | 1.202433  | -0.163653 |
| 3                | 6                | 0              | 3.723220                | -0.000017 | -0.000054 |
| 4                | 6                | 0              | 3.024288                | -1.202461 | 0.163564  |
| 5                | 6                | 0              | 1.645399                | -1.169598 | 0.157697  |
| 6                | 7                | 0              | 0.985695                | -0.000005 | -0.000015 |
| 7                | 1                | 0              | 1.023470                | 2.050137  | -0.275684 |
| 8                | 1                | 0              | 3.548928                | 2.141337  | -0.291191 |
| 9                | 1                | 0              | 3.548917                | -2.141370 | 0.291088  |
| 10               | 1                | 0              | 1.023460                | -2.050148 | 0.275654  |
| 11               | 6                | 0              | 5.160311                | -0.000023 | -0.000075 |
| 12               | 7                | 0              | 6.316228                | -0.000028 | -0.000092 |
| 13               | 5                | 0              | -0.529990               | 0.000002  | 0.000007  |
| 14               | 8                | 0              | -1.206442               | -1.136048 | 0.198568  |
| 15               | 8                | 0              | -1.206438               | 1.136058  | -0.198533 |
| 16               | 6                | 0              | -2.609807               | -0.778523 | -0.108497 |
| 17               | 6                | 0              | -2.609797               | 0.778546  | 0.108574  |
| 18               | 6                | 0              | -3.516829               | -1.548994 | 0.830185  |
| 19               | 1                | 0              | -4.554494               | -1.236154 | 0.682931  |
| 20               | 1                | 0              | -3.450308               | -2.616440 | 0.610668  |
| 21               | 1                | 0              | -3.246810               | -1.391249 | 1.874729  |
| 22               | 6                | 0              | -2.838444               | -1.185104 | -1.557882 |
| 23               | 1                | 0              | -2.629097               | -2.251072 | -1.666959 |
| 24               | 1                | 0              | -3.875405               | -1.006323 | -1.850595 |
| 25               | 1                | 0              | -2.186850               | -0.630159 | -2.239416 |
| 26               | 6                | 0              | -3.516839               | 1.549026  | -0.830081 |
| 27               | 1                | 0              | -4.554503               | 1.236196  | -0.682796 |
| 28               | 1                | 0              | -3.450301               | 2.616471  | -0.610567 |
| 29               | 1                | 0              | -3.246853               | 1.391278  | -1.874634 |
| 30               | 6                | 0              | -2.838386               | 1.185129  | 1.557965  |
| 31               | 1                | 0              | -2.629026               | 2.251095  | 1.667036  |
| 32               | 1                | 0              | -3.875340               | 1.006358  | 1.850710  |
| 33               | 1                | 0              | -2.186777               | 0.630178  | 2.239480  |

## I anion

|                                              |                             |
|----------------------------------------------|-----------------------------|
| Zero-point correction=                       | 0.000000 (Hartree/Particle) |
| Thermal correction to Energy=                | 0.001416                    |
| Thermal correction to Enthalpy=              | 0.002360                    |
| Thermal correction to Gibbs Free Energy=     | -0.016848                   |
| Sum of electronic and zero-point Energies=   | -11.419267                  |
| Sum of electronic and thermal Energies=      | -11.417851                  |
| Sum of electronic and thermal Enthalpies=    | -11.416907                  |
| Sum of electronic and thermal Free Energies= | -11.436116                  |

Esol = -11.476239

## 7. References

- [1]. Gaussian 16, Revision A.03, M. J. Frisch, G. W. Trucks, H. B. Schlegel, G. E. Scuseria, M. A. Robb, J. R. Cheeseman, G. Scalmani, V. Barone, G. A. Petersson, H. Nakatsuji, X. Li, M. Caricato, A. V. Marenich, J. Bloino, B. G. Janesko, R. Gomperts, B. Mennucci, H. P. Hratchian, J. V. Ortiz, A. F. Izmaylov, J. L. Sonnenberg, D. Williams-Young, F. Ding, F. Lipparini, F. Egidi, J. Goings, B. Peng, A. Petrone, T. Henderson, D. Ranasinghe, V. G. Zakrzewski, J. Gao, N. Rega, G. Zheng, W. Liang, M. Hada, M. Ehara, K. Toyota, R. Fukuda, J. Hasegawa, M. Ishida, T. Nakajima, Y. Honda, O. Kitao, H. Nakai, T. Vreven, K. Throssell, J. A. Montgomery, Jr., J. E. Peralta, F. Ogliaro, M. J. Bearpark, J. J. Heyd, E. N. Brothers, K. N. Kudin, V. N. Staroverov, T. A. Keith, R. Kobayashi, J. Normand, K. Raghavachari, A. P. Rendell, J. C. Burant, S. S. Iyengar, J. Tomasi, M. Cossi, J. M. Millam, M. Klene, C. Adamo, R. Cammi, J. W. Ochterski, R. L. Martin, K. Morokuma, O. Farkas, J. B. Foresman, and D. J. Fox, Gaussian, Inc., Wallingford CT, 2016.
- [2]. a) Y. Zhao, N. E. Schultz, D. G. Truhlar, *J. Chem. Theory. Comput.* **2006**, 2, 364; b) Y. Zhao, D. G. Truhlar, *J. Chem. Phys.* **2006**, 125, 194101; c) Y. Zhao, D. G. Truhlar, *J. Phys. Chem. A* **2006**, 110, 13126.
- [3]. C. Gonzalez, H. B. Schlegel, *J. Chem. Phys.* **1989**, 90, 2154.
- [4]. J. Tomasi, M. Persico, *Chem. Rev.* **1994**, 94, 2027.
- [5]. CYLview, 1.0b ; C. Y. Legault, Université de Sherbrooke, **2009** (<http://www.cylview.org>)
- [6]. J. Z. Huang, O. Lu, J. Li, J. Zheng, W. X. Yan, W. Q. Wu, H. F. Jiang, *Org. Lett.* **2018**, 20, 5090.
- [7]. S. Mukherjee, R. A. Garza-Sanchez, A. Tlahuext-Aca, F. Glorius, *Angew. Chem. Int. Ed.* **2017**, 56, 14723.
- [8]. K. Miyazawa, T. Koike, M. Akita, *Chem. Eur. J.* **2015**, 21, 11677.
